# Supplementary material for: A viral assembly inhibitor blocks SARS-CoV-2 replication in airway epithelial cells
Source: Commun Biol. 2024 Apr 22;7:486. doi: 10.1038/s42003-024-06130-8 (PMC11035691; doi:10.1038/s42003-024-06130-8)
Supplement: Supplementary file 3 — Supplementary Data 1 [file 42003_2024_6130_MOESM3_ESM.xlsx]

## Sheet: Table S1
geneID	chrom	start	end	strand	symbol	biotype	baseMean	log2FoldChange	lfcSE	stat	pvalue	padj
ENSG00000111331	12	112938444	112973251	+	OAS3	protein_coding	848.34	2.78879	0.404738	6.89036	5.56494e-12	8.11758e-08
ENSG00000177606	1	58780791	58784047	-	JUN	protein_coding	1926.68	2.05186	0.352983	5.81291	6.13977e-09	4.47804e-05
ENSG00000181381	4	168356735	168537786	-	DDX60L	protein_coding	1505.65	2.05243	0.377561	5.43601	5.44854e-08	0.000264926
ENSG00000119922	10	89283694	89309271	+	IFIT2	protein_coding	2859.71	4.09301	0.762846	5.36545	8.07482e-08	0.000294468
ENSG00000169245	4	76021118	76023497	-	CXCL10	protein_coding	635.112	6.12913	1.16794	5.24783	1.53897e-07	0.00044898
ENSG00000130589	20	63558086	63574239	-	HELZ2	protein_coding	535.066	2.319	0.445679	5.2033	1.9578e-07	0.000475974
ENSG00000162772	1	212565334	212620777	+	ATF3	protein_coding	1014.52	1.68145	0.324982	5.17397	2.29171e-07	0.000477559
ENSG00000119917	10	89327997	89340971	+	IFIT3	protein_coding	1492.62	3.07936	0.601192	5.1221	3.02156e-07	0.000489728
ENSG00000187608	1	1001138	1014540	+	ISG15	protein_coding	1703.97	3.05434	0.593757	5.1441	2.6881e-07	0.000489728
ENSG00000111335	12	112978395	113011723	+	OAS2	protein_coding	3219.67	1.80605	0.358396	5.03926	4.67332e-07	0.000681698
ENSG00000089127	12	112906783	112933222	+	OAS1	protein_coding	1380.41	1.80662	0.362508	4.98368	6.23877e-07	0.000700038
ENSG00000134321	2	6865806	6898239	+	RSAD2	protein_coding	766.158	3.58745	0.719835	4.9837	6.23785e-07	0.000700038
ENSG00000185745	10	89392546	89406487	+	IFIT1	protein_coding	3376.98	3.70285	0.741401	4.9944	5.90189e-07	0.000700038
ENSG00000177409	7	93130056	93148385	-	SAMD9L	protein_coding	1960.99	1.7967	0.362708	4.95358	7.28607e-07	0.000759156
ENSG00000073756	1	186671791	186680423	-	PTGS2	protein_coding	458.643	1.78208	0.361812	4.92544	8.41717e-07	0.000818542
ENSG00000138623	15	74409289	74433958	-	SEMA7A	protein_coding	274.801	3.67487	0.756985	4.85461	1.20625e-06	0.00109972
ENSG00000137959	1	78619922	78646145	+	IFI44L	protein_coding	1312.95	4.03485	0.835426	4.82969	1.36748e-06	0.00110819
ENSG00000154764	3	13816258	13880071	-	WNT7A	protein_coding	112.702	3.2496	0.671795	4.83719	1.31689e-06	0.00110819
ENSG00000115267	2	162267074	162318684	-	IFIH1	protein_coding	873.939	1.67418	0.348448	4.80467	1.55006e-06	0.00119004
ENSG00000120738	5	138465479	138469303	+	EGR1	protein_coding	359.118	2.08711	0.438637	4.75816	1.95363e-06	0.00142488
ENSG00000138755	4	76001275	76007509	-	CXCL9	protein_coding	38.5785	4.13869	0.875991	4.72458	2.30592e-06	0.00160174
ENSG00000126368	17	40092793	40100589	-	NR1D1	protein_coding	1055.01	1.69711	0.363284	4.67158	2.98885e-06	0.00198174
ENSG00000185507	11	612553	615983	-	IRF7	protein_coding	370.881	1.7448	0.375165	4.65075	3.30737e-06	0.00209759
ENSG00000068079	17	43006725	43014456	+	IFI35	protein_coding	209.862	1.88078	0.411026	4.57581	4.74382e-06	0.00288325
ENSG00000107201	9	32455302	32526208	-	DDX58	protein_coding	1711.63	1.8811	0.412245	4.56305	5.0415e-06	0.0029216
ENSG00000169248	4	76033682	76041415	-	CXCL11	protein_coding	268.01	5.80519	1.27412	4.55625	5.20749e-06	0.0029216
ENSG00000138642	4	88378739	88443111	+	HERC6	protein_coding	981.418	1.63659	0.365275	4.48044	7.44903e-06	0.0040244
ENSG00000115414	2	215360440	215436073	-	FN1	protein_coding	1362.94	4.6068	1.03211	4.4635	8.06332e-06	0.00414902
ENSG00000121060	17	56836387	56914080	-	TRIM25	protein_coding	727.373	1.28612	0.288456	4.45863	8.24855e-06	0.00414902
ENSG00000102524	13	108251240	108308484	+	TNFSF13B	protein_coding	81.3396	1.9074	0.430065	4.43515	9.2007e-06	0.00447369
ENSG00000115415	2	190908460	191020960	-	STAT1	protein_coding	5154.63	1.2364	0.280034	4.41516	1.00935e-05	0.00453514
ENSG00000126709	1	27666064	27672198	-	IFI6	protein_coding	960.88	2.93023	0.664208	4.41162	1.02598e-05	0.00453514
ENSG00000134326	2	6840570	6866635	-	CMPK2	protein_coding	411.941	2.94756	0.666161	4.4247	9.65761e-06	0.00453514
ENSG00000055332	2	37099210	37157065	-	EIF2AK2	protein_coding	1638.78	1.0336	0.236692	4.36684	1.26059e-05	0.00540829
ENSG00000137965	1	78649796	78664078	+	IFI44	protein_coding	1294.41	1.78755	0.41087	4.35065	1.35735e-05	0.00549991
ENSG00000157601	21	41420304	41459214	+	MX1	protein_coding	2606.13	2.34282	0.538143	4.35353	1.33963e-05	0.00549991
ENSG00000168394	6	32845209	32853978	-	TAP1	protein_coding	651.932	1.33583	0.307513	4.34397	1.39934e-05	0.00551679
ENSG00000100985	20	46008908	46016561	+	MMP9	protein_coding	236.581	3.26199	0.754307	4.32449	1.52886e-05	0.00586881
ENSG00000120217	9	5450503	5470566	+	CD274	protein_coding	387.701	1.49994	0.349442	4.29238	1.76768e-05	0.00661158
ENSG00000137200	6	37433219	37482827	+	CMTR1	protein_coding	423.157	0.866382	0.202128	4.28629	1.81679e-05	0.00662537
ENSG00000166483	11	9573670	9593457	+	WEE1	protein_coding	762.193	0.611134	0.143896	4.24706	2.16597e-05	0.00770609
ENSG00000132530	17	6755447	6775647	+	XAF1	protein_coding	359.314	1.92207	0.454001	4.23362	2.29961e-05	0.00798676
ENSG00000125740	19	45467995	45475179	+	FOSB	protein_coding	102.653	4.05362	0.961565	4.21565	2.49059e-05	0.0084489
ENSG00000010818	6	142751469	142956698	-	HIVEP2	protein_coding	628.204	0.941348	0.225081	4.18226	2.88631e-05	0.00935613
ENSG00000140853	16	56989485	57083531	+	NLRC5	protein_coding	176.999	1.63824	0.391681	4.18258	2.88213e-05	0.00935613
ENSG00000110446	11	60937084	60952530	-	SLC15A3	protein_coding	64.3742	2.21164	0.530684	4.16753	3.07918e-05	0.00976435
ENSG00000140464	15	73994673	74047827	+	PML	protein_coding	668.299	1.37398	0.330658	4.15529	3.24872e-05	0.0100828
ENSG00000184979	22	18150170	18177397	+	USP18	protein_coding	335.61	1.60257	0.386345	4.14804	3.3534e-05	0.0101908
ENSG00000163840	3	122564338	122575203	+	DTX3L	protein_coding	623.92	1.1157	0.269535	4.13934	3.48302e-05	0.0103688
ENSG00000141971	19	17405722	17433724	+	MVB12A	protein_coding	354.935	0.946167	0.229459	4.12347	3.73213e-05	0.0108881
ENSG00000123143	19	14433053	14471867	+	PKN1	protein_coding	519.951	1.33321	0.323976	4.11515	3.86935e-05	0.0110671
ENSG00000205413	7	93099513	93118023	-	SAMD9	protein_coding	4406.48	1.2362	0.300832	4.10928	3.96898e-05	0.0111338
ENSG00000158050	2	96143169	96145440	-	DUSP2	protein_coding	81.1767	2.9539	0.7301	4.04589	5.21252e-05	0.0143462
ENSG00000163644	4	88257620	88284769	-	PPM1K	protein_coding	389.537	1.2794	0.317253	4.03274	5.51291e-05	0.014892
ENSG00000183486	21	41361999	41409393	+	MX2	protein_coding	1203.98	2.54648	0.633814	4.01771	5.8767e-05	0.0155861
ENSG00000128284	22	36140330	36166177	-	APOL3	protein_coding	120.483	1.12877	0.281593	4.00852	6.11e-05	0.0159155
ENSG00000271503	17	35871491	35880793	-	CCL5	protein_coding	36.8228	3.7952	0.963766	3.93788	8.22032e-05	0.0210368
ENSG00000173786	17	41966763	41977740	+	CNP	protein_coding	411.179	1.49695	0.381205	3.92689	8.60525e-05	0.0216422
ENSG00000179094	17	8140472	8156506	-	PER1	protein_coding	925.293	1.12378	0.287441	3.90961	9.2447e-05	0.0228563
ENSG00000118503	6	137867214	137883312	+	TNFAIP3	protein_coding	627.255	1.44186	0.369499	3.90219	9.53258e-05	0.0231753
ENSG00000136695	2	113058638	113065382	+	IL36RN	protein_coding	35.4994	3.36525	0.865999	3.88598	0.000101919	0.0243719
ENSG00000144655	3	39141855	39154562	-	CSRNP1	protein_coding	103.18	1.76243	0.454727	3.87579	0.000106279	0.0246078
ENSG00000155287	10	99610522	99620609	-	SLC25A28	protein_coding	291.332	0.930343	0.23985	3.87886	0.000104948	0.0246078
ENSG00000138166	10	110497907	110511533	+	DUSP5	protein_coding	3779.18	1.57426	0.409346	3.84579	0.000120164	0.027388
ENSG00000122861	10	73909177	73917496	+	PLAU	protein_coding	4308.8	1.91186	0.499178	3.83003	0.00012813	0.0287544
ENSG00000135114	12	121019111	121039242	-	OASL	protein_coding	285.377	3.60058	0.95613	3.76579	0.000166025	0.0366181
ENSG00000160888	19	13150411	13154911	+	IER2	protein_coding	170.032	1.4354	0.381497	3.76255	0.000168192	0.0366181
ENSG00000196684	19	16134028	16158575	+	HSH2D	protein_coding	214.838	1.57909	0.420726	3.75325	0.000174556	0.0374449
ENSG00000137628	4	168216294	168318804	-	DDX60	protein_coding	2074.32	1.42698	0.380897	3.74636	0.000179419	0.0379302
ENSG00000105327	19	47220822	47232766	-	BBC3	protein_coding	410.069	1.36735	0.366263	3.73326	0.00018902	0.0389733
ENSG00000162654	1	89181144	89198942	-	GBP4	protein_coding	1190.59	1.29794	0.347753	3.73236	0.000189697	0.0389733
ENSG00000172269	11	119096503	119108331	-	DPAGT1	protein_coding	896.904	-0.443355	0.119571	-3.70789	0.000208992	0.0423412
ENSG00000130303	19	17402939	17405630	-	BST2	protein_coding	824.383	1.4847	0.401437	3.69847	0.000216902	0.0430522
ENSG00000198286	7	2906141	3043945	-	CARD11	protein_coding	222.038	1.3953	0.377442	3.69672	0.000218404	0.0430522
ENSG00000138646	4	88457119	88506163	+	HERC5	protein_coding	259.356	4.00025	1.08478	3.68763	0.000226357	0.0434456
ENSG00000162817	1	220690363	220699153	+	C1orf115	protein_coding	84.4488	1.47216	0.398903	3.69053	0.000223786	0.0434456
ENSG00000117984	11	1752755	1764573	-	CTSD	protein_coding	2129.33	1.47257	0.39994	3.68197	0.000231442	0.0438447
ENSG00000078081	3	183122215	183163839	-	LAMP3	protein_coding	245.056	1.66705	0.453783	3.67368	0.000239082	0.0447114
ENSG00000136816	9	129803157	129811281	+	TOR1B	protein_coding	339.55	0.995914	0.271576	3.66716	0.00024526	0.0452862
ENSG00000117228	1	89052319	89065230	-	GBP1	protein_coding	1449.97	0.99133	0.271079	3.65698	0.000255208	0.0465341
ENSG00000101347	20	36889773	36951901	-	SAMHD1	protein_coding	1663.34	0.690746	0.189805	3.63925	0.000273435	0.0492419
ENSG00000159399	2	74834127	74893359	+	HK2	protein_coding	1227.79	1.36114	0.375894	3.62107	0.000293391	0.0521915
ENSG00000029993	X	150980509	150990771	+	HMGB3	protein_coding	1069.24	-0.710901	0.196956	-3.60944	0.000306856	0.0538364
ENSG00000135899	2	230167293	230225729	-	SP110	protein_coding	291.564	1.44343	0.4002	3.60678	0.000310019	0.0538364
ENSG00000100226	22	38705742	38738299	+	GTPBP1	protein_coding	799.854	0.792641	0.22022	3.59931	0.000319065	0.0547553
ENSG00000105939	7	139043515	139109720	-	ZC3HAV1	protein_coding	810.906	0.887924	0.246919	3.59602	0.000323123	0.054807
ENSG00000173821	17	80260866	80398786	+	RNF213	protein_coding	3685.76	1.17432	0.327915	3.58116	0.000342069	0.0573535
ENSG00000080493	4	71062667	71572087	+	SLC4A4	protein_coding	237.04	-1.62795	0.455434	-3.57451	0.000350881	0.0581626
ENSG00000109062	17	74748628	74769353	+	SLC9A3R1	protein_coding	1605.16	1.25953	0.353448	3.56354	0.000365884	0.0599679
ENSG00000172183	15	88636153	88656483	+	ISG20	protein_coding	553.124	1.1568	0.325884	3.54974	0.00038561	0.0624989
ENSG00000173193	3	122680839	122730840	+	PARP14	protein_coding	3861.86	1.06932	0.301508	3.54658	0.000390265	0.0625582
ENSG00000176658	17	32492522	32877177	-	MYO1D	protein_coding	955.479	1.26368	0.357458	3.5352	0.000407474	0.0646067
ENSG00000072121	14	67727374	67816590	-	ZFYVE26	protein_coding	457.796	0.873212	0.24768	3.52557	0.000422578	0.0662812
ENSG00000168062	11	64987945	64997018	-	BATF2	protein_coding	60.072	2.16316	0.615638	3.51369	0.000441935	0.0685798
ENSG00000077549	1	19338775	19485539	-	CAPZB	protein_coding	1286.19	1.04831	0.29961	3.49892	0.000467144	0.0717287
ENSG00000057657	6	105993463	106109939	+	PRDM1	protein_coding	288.18	1.15614	0.331222	3.49052	0.000482079	0.0728278
ENSG00000137193	6	37170152	37175428	+	PIM1	protein_coding	1737.57	1.29315	0.370605	3.4893	0.000484287	0.0728278
ENSG00000106785	9	98069275	98119222	-	TRIM14	protein_coding	477.585	1.0096	0.289916	3.48238	0.000496982	0.0739742
ENSG00000072062	19	14091688	14118084	-	PRKACA	protein_coding	258.315	1.16985	0.337041	3.47095	0.000518623	0.0749024
ENSG00000145901	5	151029945	151093577	-	TNIP1	protein_coding	920.056	1.24039	0.357272	3.47183	0.000516921	0.0749024
ENSG00000171223	19	12791486	12793315	+	JUNB	protein_coding	2458.55	1.24652	0.358862	3.47353	0.000513654	0.0749024
ENSG00000065320	17	9021510	9244000	+	NTN1	protein_coding	485.977	1.50621	0.434638	3.46543	0.000529386	0.0757073
ENSG00000148339	9	128068201	128109245	+	SLC25A25	protein_coding	318.516	1.05171	0.304257	3.45666	0.000546924	0.0774561
ENSG00000277749	15	74311516	74319688	-	AC023300.2	lncRNA	122.836	-0.977861	0.283335	-3.45126	0.000557983	0.0782625
ENSG00000159720	16	67438014	67481181	-	ATP6V0D1	protein_coding	823.635	0.888287	0.257964	3.44345	0.000574341	0.0797897
ENSG00000102921	16	48538726	48620148	-	N4BP1	protein_coding	563.707	0.713418	0.208918	3.41482	0.000638246	0.0871482
ENSG00000172354	7	100673567	100679174	+	GNB2	protein_coding	1700.09	1.13629	0.332796	3.41439	0.000639258	0.0871482
ENSG00000142871	1	85580761	85583950	+	CCN1	protein_coding	529.53	1.44206	0.424228	3.39926	0.000675695	0.0907732
ENSG00000170581	12	56341597	56360167	-	STAT2	protein_coding	1151.64	0.971829	0.285983	3.39821	0.000678295	0.0907732
ENSG00000143878	2	20447074	20449440	+	RHOB	protein_coding	561.441	1.44314	0.42581	3.38916	0.000701079	0.0921318
ENSG00000185338	16	11254408	11256204	-	SOCS1	protein_coding	35.0897	3.09043	0.911668	3.38987	0.000699263	0.0921318
ENSG00000130513	19	18374731	18389176	+	GDF15	protein_coding	8396.6	1.93561	0.57239	3.38163	0.000720579	0.093849
ENSG00000143819	1	225810092	225845563	+	EPHX1	protein_coding	1564.64	0.839016	0.248679	3.37389	0.000741131	0.0956715
ENSG00000107829	10	101610664	101695295	-	FBXW4	protein_coding	168.745	1.09365	0.324588	3.36935	0.000753449	0.0964084
ENSG00000242028	15	43796142	43803043	+	HYPK	protein_coding	25.6558	-1.62603	0.4832	-3.36513	0.000765089	0.0970465
ENSG00000053918	11	2444684	2849105	+	KCNQ1	protein_coding	177.766	1.34096	0.400606	3.34733	0.000815929	0.0983633
ENSG00000058085	1	183186238	183245127	+	LAMC2	protein_coding	11667.4	1.22941	0.367123	3.34878	0.000811695	0.0983633
ENSG00000071051	2	105744912	105894274	+	NCK2	protein_coding	455.182	0.894699	0.267033	3.35052	0.000806586	0.0983633
ENSG00000126005	20	35201745	35278131	-	MMP24OS	protein_coding	333.362	0.945732	0.282469	3.34809	0.000813709	0.0983633
ENSG00000130726	19	58544064	58550722	+	TRIM28	protein_coding	829.924	1.01407	0.302565	3.35159	0.000803489	0.0983633
ENSG00000134871	13	110305812	110513209	+	COL4A2	protein_coding	26.976	3.47612	1.03532	3.35753	0.000786421	0.0983633
ENSG00000100242	22	38734725	38794143	-	SUN2	protein_coding	389.285	0.716378	0.214763	3.33566	0.000850965	0.101746
ENSG00000221963	22	35648446	35668404	+	APOL6	protein_coding	1933.45	0.73982	0.222892	3.31918	0.000902822	0.107069
ENSG00000087245	16	55389700	55506691	+	MMP2	protein_coding	117.497	1.91392	0.577198	3.31588	0.000913547	0.107467
ENSG00000196116	9	97412096	97496125	+	TDRD7	protein_coding	468.627	0.798152	0.240921	3.31292	0.000923258	0.107741
ENSG00000130766	1	28259518	28282491	+	SESN2	protein_coding	223.674	1.19909	0.362484	3.30798	0.00093972	0.108791
ENSG00000116717	1	67685201	67688334	+	GADD45A	protein_coding	2281.91	1.0224	0.31059	3.29179	0.000995505	0.114342
ENSG00000100219	22	28794555	28800597	-	XBP1	protein_coding	9721.16	-0.553376	0.169	-3.27442	0.00105881	0.120663
ENSG00000122641	7	41667168	41705834	-	INHBA	protein_coding	82.2374	2.04967	0.627841	3.26463	0.00109606	0.123939
ENSG00000108771	17	42101404	42112714	-	DHX58	protein_coding	270.76	0.971036	0.2983	3.25523	0.001133	0.12616
ENSG00000164054	3	48467798	48504826	-	SHISA5	protein_coding	799.598	1.09399	0.335944	3.25647	0.00112805	0.12616
ENSG00000141574	17	82321024	82334074	-	SECTM1	protein_coding	405.171	1.3674	0.420673	3.25051	0.00115198	0.127303
ENSG00000078808	1	1216908	1232067	-	SDF4	protein_coding	923.852	0.941182	0.29069	3.23775	0.00120476	0.130992
ENSG00000090339	19	10271093	10286615	+	ICAM1	protein_coding	277.05	1.48612	0.459847	3.23177	0.00123027	0.130992
ENSG00000113140	5	151661096	151686975	-	SPARC	protein_coding	79.5623	1.21869	0.376877	3.23366	0.00122215	0.130992
ENSG00000141510	17	7661779	7687550	-	TP53	protein_coding	173.973	0.99284	0.306654	3.23766	0.00120516	0.130992
ENSG00000151014	4	139015781	139045939	+	NOCT	protein_coding	64.7598	1.31636	0.407072	3.23374	0.00122182	0.130992
ENSG00000124201	20	49237946	49278426	-	ZNFX1	protein_coding	1674.65	0.82056	0.254204	3.22796	0.00124678	0.13103
ENSG00000125534	20	63520765	63522206	+	PPDPF	protein_coding	2122.53	1.22998	0.381088	3.22754	0.00124859	0.13103
ENSG00000127666	19	4815932	4831704	-	TICAM1	protein_coding	212.834	1.31883	0.409683	3.21914	0.00128576	0.132179
ENSG00000127954	7	88270892	88306891	-	STEAP4	protein_coding	1544.79	-0.804996	0.250239	-3.21691	0.00129579	0.132179
ENSG00000141753	17	40443450	40457725	+	IGFBP4	protein_coding	1124.66	1.07406	0.333684	3.2188	0.00128729	0.132179
ENSG00000155367	1	112709994	112715477	-	PPM1J	protein_coding	36.9368	1.49712	0.464583	3.22251	0.00127073	0.132179
ENSG00000204052	6	43506969	43510686	-	LRRC73	protein_coding	82.0326	1.29831	0.404054	3.21322	0.00131257	0.132961
ENSG00000168961	17	27629798	27649560	+	LGALS9	protein_coding	499.842	0.949424	0.295668	3.21112	0.00132219	0.133012
ENSG00000140750	16	24919389	25015666	-	ARHGAP17	protein_coding	299.587	0.80335	0.250355	3.20884	0.00133272	0.133153
ENSG00000048052	7	18086949	19002416	+	HDAC9	protein_coding	626.956	1.27866	0.400548	3.19227	0.00141161	0.140075
ENSG00000161921	17	4733533	4739928	-	CXCL16	protein_coding	496.59	1.20802	0.379128	3.18631	0.00144099	0.142025
ENSG00000158125	2	31334321	31414742	-	XDH	protein_coding	124.806	1.45504	0.457147	3.18286	0.00145826	0.142762
ENSG00000053747	18	23689443	23956222	+	LAMA3	protein_coding	4736.11	1.20864	0.380631	3.17535	0.00149655	0.143619
ENSG00000140105	14	100333790	100376805	-	WARS1	protein_coding	2111.54	1.02685	0.323223	3.17691	0.00148855	0.143619
ENSG00000260284	16	1286351	1288837	-	TPSP2	unprocessed_pseudogene	50.148	3.54708	1.11596	3.17851	0.00148033	0.143619
ENSG00000168016	3	36826820	36945098	-	TRANK1	protein_coding	619.83	0.889818	0.280698	3.17002	0.0015243	0.145326
ENSG00000160710	1	154582057	154628013	-	ADAR	protein_coding	2969.99	0.628475	0.199173	3.15542	0.00160266	0.151805
ENSG00000166188	16	57994668	58000453	-	ZNF319	protein_coding	71.7358	1.45213	0.460674	3.1522	0.00162048	0.152502
ENSG00000198113	9	137277726	137282641	+	TOR4A	protein_coding	376.424	1.34342	0.427542	3.1422	0.00167684	0.156795
ENSG00000178685	8	143977153	144012772	-	PARP10	protein_coding	482.544	0.8666	0.276133	3.13834	0.00169906	0.157861
ENSG00000125347	5	132481609	132490777	-	IRF1	protein_coding	924.651	1.00577	0.321244	3.13085	0.001743	0.160919
ENSG00000103966	15	41895933	41972557	-	EHD4	protein_coding	687.186	1.31808	0.422213	3.12182	0.00179735	0.164892
ENSG00000106366	7	101127104	101139247	+	SERPINE1	protein_coding	1294.05	2.01159	0.645509	3.11629	0.00183145	0.166971
ENSG00000133106	13	42886388	42992271	-	EPSTI1	protein_coding	349.819	2.17997	0.70127	3.10861	0.00187971	0.170306
ENSG00000135926	2	218274197	218292586	-	TMBIM1	protein_coding	4418.59	1.09481	0.353034	3.10116	0.00192765	0.170416
ENSG00000171443	19	55600022	55603138	+	ZNF524	protein_coding	115.534	1.08487	0.34979	3.10148	0.00192559	0.170416
ENSG00000175550	11	65919274	65921563	+	DRAP1	protein_coding	595.242	1.10787	0.356728	3.10565	0.00189859	0.170416
ENSG00000185022	22	38200767	38216507	+	MAFF	protein_coding	579.744	1.30175	0.419469	3.10332	0.00191365	0.170416
ENSG00000196365	19	5691834	5720572	-	LONP1	protein_coding	428.094	0.870148	0.281045	3.09611	0.00196076	0.172299
ENSG00000178951	19	4043303	4066899	-	ZBTB7A	protein_coding	1088.52	0.839086	0.27133	3.09249	0.00198488	0.173374
ENSG00000124226	20	49936336	49953885	+	RNF114	protein_coding	885.635	0.745638	0.241396	3.08886	0.00200928	0.173885
ENSG00000189060	22	37805093	37807436	+	H1-0	protein_coding	1991.23	0.751422	0.24333	3.08808	0.00201458	0.173885
ENSG00000128283	22	37560480	37569405	+	CDC42EP1	protein_coding	240.102	1.17243	0.380575	3.08068	0.00206529	0.177214
ENSG00000130775	1	27872543	27886685	+	THEMIS2	protein_coding	88.6625	1.88184	0.611212	3.07887	0.00207786	0.17725
ENSG00000010030	6	36354091	36387800	-	ETV7	protein_coding	69.0259	1.36466	0.443522	3.07686	0.00209192	0.177412
ENSG00000181649	11	2928273	2929420	-	PHLDA2	protein_coding	1263.92	1.82448	0.593452	3.07435	0.00210964	0.177881
ENSG00000173110	1	161524540	161526894	+	HSPA6	protein_coding	617.788	1.4053	0.45788	3.06915	0.00214669	0.179964
ENSG00000072110	14	68874143	68979440	-	ACTN1	protein_coding	966.739	1.03074	0.336513	3.063	0.00219127	0.181614
ENSG00000140682	16	31471585	31477960	+	TGFB1I1	protein_coding	30.5268	1.39247	0.454477	3.06389	0.00218481	0.181614
ENSG00000157216	1	54225432	54413479	-	SSBP3	protein_coding	256.119	0.848426	0.277386	3.05865	0.00222335	0.183232
ENSG00000060491	20	62804835	62814000	+	OGFR	protein_coding	446.335	0.829857	0.272364	3.04687	0.00231236	0.186619
ENSG00000110651	11	2376177	2397419	+	CD81	protein_coding	1371.79	0.937	0.307421	3.04793	0.00230421	0.186619
ENSG00000117298	1	21217247	21345572	-	ECE1	protein_coding	939.428	1.27128	0.417298	3.04645	0.00231563	0.186619
ENSG00000122971	12	120725774	120740008	+	ACADS	protein_coding	100.734	0.860106	0.282183	3.04804	0.00230337	0.186619
ENSG00000173801	17	41754604	41786931	-	JUP	protein_coding	4360.34	1.06212	0.349269	3.04097	0.00235818	0.189004
ENSG00000184009	17	81509971	81523847	-	ACTG1	protein_coding	22092.5	1.09553	0.360596	3.03812	0.00238059	0.189758
ENSG00000138035	2	55634061	55693863	-	PNPT1	protein_coding	1119.01	0.70792	0.234034	3.02486	0.00248746	0.197199
ENSG00000172216	20	50190830	50192668	+	CEBPB	protein_coding	1418.62	1.17968	0.391762	3.01121	0.0026021	0.205172
ENSG00000125826	20	407498	430966	+	RBCK1	protein_coding	774.59	0.691266	0.22986	3.00733	0.00263549	0.206688
ENSG00000099860	19	2476122	2478259	+	GADD45B	protein_coding	1051.84	0.964882	0.321461	3.00156	0.00268604	0.208747
ENSG00000169583	9	136994608	136996568	-	CLIC3	protein_coding	228.955	1.44175	0.480414	3.00106	0.00269037	0.208747
ENSG00000255112	18	11851413	11854444	+	CHMP1B	protein_coding	1680.6	-0.364233	0.12145	-2.99903	0.00270839	0.209034
ENSG00000129757	11	2883213	2885773	-	CDKN1C	protein_coding	520.726	1.16497	0.389462	2.99122	0.00277868	0.212212
ENSG00000185803	8	144354135	144361272	+	SLC52A2	protein_coding	143.933	1.0322	0.344908	2.99268	0.00276539	0.212212
ENSG00000118523	6	131948176	131951372	-	CCN2	protein_coding	1279.06	0.907006	0.303812	2.98542	0.0028319	0.214036
ENSG00000127616	19	10960825	11079426	+	SMARCA4	protein_coding	1449.07	0.792627	0.265474	2.9857	0.00282928	0.214036
ENSG00000110057	11	67991100	68004982	-	UNC93B1	protein_coding	1429.82	1.00625	0.33747	2.98175	0.00286609	0.215503
ENSG00000118898	16	4882507	4960741	-	PPL	protein_coding	3607.1	0.949562	0.318927	2.97736	0.00290741	0.217489
ENSG00000108179	10	79347469	79355334	+	PPIF	protein_coding	442.371	0.821694	0.276496	2.97181	0.00296049	0.218104
ENSG00000135334	6	87674860	87702233	-	AKIRIN2	protein_coding	660.332	0.909861	0.306066	2.97276	0.00295138	0.218104
ENSG00000197879	17	1464186	1492686	-	MYO1C	protein_coding	1032.32	0.965677	0.324906	2.97217	0.00295703	0.218104
ENSG00000138496	3	122527924	122564577	-	PARP9	protein_coding	2230.27	0.862623	0.290629	2.96812	0.00299625	0.21963
ENSG00000052795	4	158769026	158908050	+	FNIP2	protein_coding	255.594	0.590242	0.200276	2.94714	0.00320724	0.232756
ENSG00000206503	6	29941260	29945884	+	HLA-A	protein_coding	5468.99	0.579103	0.19645	2.94784	0.00320006	0.232756
ENSG00000184363	11	392614	404908	+	PKP3	protein_coding	854.997	0.78471	0.266409	2.94551	0.00322426	0.232833
ENSG00000055070	1	16352575	16398145	+	SZRD1	protein_coding	340.826	0.866179	0.295128	2.93493	0.00333622	0.238556
ENSG00000134531	12	13196723	13219941	+	EMP1	protein_coding	2639.7	0.825312	0.281168	2.9353	0.00333223	0.238556
ENSG00000163932	3	53156009	53192717	+	PRKCD	protein_coding	605.381	0.8608	0.294163	2.92627	0.0034305	0.244101
ENSG00000067082	10	3775996	3785281	-	KLF6	protein_coding	1728.9	0.950338	0.325274	2.92166	0.00348175	0.245566
ENSG00000150457	13	20973036	21061586	-	LATS2	protein_coding	242.192	0.931769	0.318947	2.92139	0.00348476	0.245566
ENSG00000116962	1	235975830	236065109	-	NID1	protein_coding	66.2264	1.45692	0.499024	2.91955	0.00350541	0.245833
ENSG00000181467	3	153162226	153170627	+	RAP2B	protein_coding	876.973	0.81461	0.279872	2.91066	0.00360669	0.250528
ENSG00000196924	X	154348524	154374638	-	FLNA	protein_coding	2903.53	0.939851	0.322876	2.91087	0.00360425	0.250528
ENSG00000170345	14	75278826	75282230	+	FOS	protein_coding	986.732	1.04118	0.359015	2.9001	0.00373049	0.257899
ENSG00000105287	19	46674275	46717127	-	PRKD2	protein_coding	670.488	0.737542	0.2548	2.89459	0.00379656	0.260002
ENSG00000267430	18	63415317	63416469	-	AC036176.2	processed_pseudogene	54.2083	1.58094	0.546036	2.8953	0.00378799	0.260002
ENSG00000116096	2	72887382	72892158	+	SPR	protein_coding	177.604	0.889144	0.307722	2.88944	0.00385926	0.263061
ENSG00000165724	9	137582081	137590512	-	ZMYND19	protein_coding	115.604	0.79089	0.274065	2.88578	0.00390449	0.264906
ENSG00000176170	17	76376584	76387860	+	SPHK1	protein_coding	161.705	1.14269	0.396955	2.87865	0.00399387	0.269716
ENSG00000156453	5	141853111	141879246	-	PCDH1	protein_coding	1063.84	0.968026	0.33647	2.877	0.00401471	0.269873
ENSG00000127528	19	16324817	16327874	+	KLF2	protein_coding	47.8163	1.99809	0.695991	2.87085	0.00409365	0.273713
ENSG00000137198	6	16238587	16295549	+	GMPR	protein_coding	65.4765	1.66316	0.579571	2.86964	0.00410935	0.273713
ENSG00000006210	16	57372477	57385044	+	CX3CL1	protein_coding	799.792	2.06611	0.721269	2.86455	0.00417599	0.274393
ENSG00000160211	X	154531391	154547572	-	G6PD	protein_coding	541.937	1.06772	0.372678	2.86499	0.00417025	0.274393
ENSG00000174938	16	29871159	29899547	-	SEZ6L2	protein_coding	158.101	1.629	0.568406	2.86591	0.00415807	0.274393
ENSG00000173039	11	65653597	65663090	-	RELA	protein_coding	561.462	0.910419	0.318434	2.85905	0.00424913	0.277946
ENSG00000130813	19	10086122	10093252	+	SHFL	protein_coding	96.8104	0.973913	0.341211	2.85429	0.00431335	0.280888
ENSG00000128016	19	39406847	39409412	+	ZFP36	protein_coding	1771.22	0.762596	0.26749	2.85094	0.00435907	0.281353
ENSG00000141582	17	79833156	79839440	-	CBX4	protein_coding	304.744	0.940484	0.329793	2.85174	0.00434804	0.281353
ENSG00000160087	1	1253909	1273885	-	UBE2J2	protein_coding	236.185	0.772465	0.271154	2.8488	0.00438838	0.281997
ENSG00000167491	19	19385826	19508931	+	GATAD2A	protein_coding	386.31	0.782528	0.275004	2.84552	0.00443397	0.283677
ENSG00000159363	1	16985958	17011928	-	ATP13A2	protein_coding	298.159	1.22896	0.432257	2.84313	0.00446729	0.284561
ENSG00000101311	20	6074845	6123544	-	FERMT1	protein_coding	346.635	1.09537	0.385696	2.83998	0.00451164	0.286136
ENSG00000105953	7	44606572	44709066	+	OGDH	protein_coding	817.465	0.891743	0.314995	2.83097	0.00464069	0.290531
ENSG00000154451	1	89258950	89272804	-	GBP5	protein_coding	228.71	1.11873	0.395022	2.83208	0.00462466	0.290531
ENSG00000204267	6	32821833	32838770	-	TAP2	protein_coding	196.065	0.757747	0.267617	2.83147	0.00463353	0.290531
ENSG00000213699	2	26764284	26781231	+	SLC35F6	protein_coding	145.204	1.068	0.377791	2.82696	0.0046992	0.292937
ENSG00000104897	19	2236824	2248655	+	SF3A2	protein_coding	193.798	0.902618	0.319784	2.82259	0.00476377	0.295606
ENSG00000226025	19	39679374	39686373	+	AC005515.1	transcribed_unprocessed_pseudogene	26.552	6.05572	2.14641	2.82133	0.00478254	0.295606
ENSG00000156030	14	73715122	73790285	-	ELMSAN1	protein_coding	510.207	0.562679	0.199538	2.81991	0.00480374	0.295663
ENSG00000184545	11	1554051	1572271	-	DUSP8	protein_coding	120.401	1.22264	0.434115	2.8164	0.00485657	0.297659
ENSG00000128335	22	36226209	36239954	-	APOL2	protein_coding	464.099	0.9019	0.320809	2.81133	0.00493375	0.298036
ENSG00000143321	1	156742109	156766925	-	HDGF	protein_coding	2522.1	0.735708	0.261491	2.81351	0.00490031	0.298036
ENSG00000184640	17	77280569	77500596	+	SEPTIN9	protein_coding	2221.31	0.981134	0.34908	2.81063	0.00494445	0.298036
ENSG00000204463	6	31639028	31652705	-	BAG6	protein_coding	1464.31	0.81508	0.289993	2.81069	0.00494359	0.298036
ENSG00000059378	7	140023749	140062951	-	PARP12	protein_coding	587.009	0.827919	0.295509	2.80168	0.00508378	0.302682
ENSG00000151693	2	9206765	9405683	+	ASAP2	protein_coding	336.71	0.852112	0.30394	2.80355	0.00505433	0.302682
ENSG00000184371	1	109910242	109930992	+	CSF1	protein_coding	83.8332	1.35729	0.484258	2.80282	0.00506586	0.302682
ENSG00000105357	19	50188186	50310542	+	MYH14	protein_coding	2463.35	0.993088	0.354917	2.79809	0.00514059	0.303586
ENSG00000140832	16	71626161	71642114	+	MARVELD3	protein_coding	181.459	0.746701	0.26679	2.79883	0.00512875	0.303586
ENSG00000105699	19	35248330	35267964	+	LSR	protein_coding	520	1.00226	0.358875	2.79279	0.00522563	0.306147
ENSG00000176087	5	140564828	140569100	+	SLC35A4	protein_coding	367.879	0.856849	0.30681	2.79277	0.00522592	0.306147
ENSG00000004975	17	7225342	7234517	-	DVL2	protein_coding	307.362	0.656617	0.235388	2.78951	0.0052788	0.308007
ENSG00000179262	19	12945855	12953642	+	RAD23A	protein_coding	374.202	0.75174	0.269746	2.78685	0.00532236	0.309312
ENSG00000101335	20	36541497	36551447	+	MYL9	protein_coding	36.5493	2.67547	0.962688	2.77916	0.00544996	0.311759
ENSG00000151012	4	138164097	138242349	-	SLC7A11	protein_coding	498.731	0.676959	0.243579	2.77922	0.00544899	0.311759
ENSG00000151715	11	129815848	129860003	+	TMEM45B	protein_coding	2858.98	-0.409418	0.14717	-2.78193	0.00540369	0.311759
ENSG00000183421	21	41739369	41767089	-	RIPK4	protein_coding	700.266	0.669975	0.241037	2.77955	0.0054434	0.311759
ENSG00000100311	22	39223359	39244982	-	PDGFB	protein_coding	39.7048	1.96213	0.707338	2.77396	0.00553783	0.312566
ENSG00000104783	19	43766533	43781257	-	KCNN4	protein_coding	163.324	0.951282	0.343019	2.77326	0.00554977	0.312566
ENSG00000125651	19	6379572	6393981	-	GTF2F1	protein_coding	539.274	0.736527	0.265565	2.77344	0.00554677	0.312566
ENSG00000143641	1	230057990	230282122	+	GALNT2	protein_coding	348.58	1.35857	0.489398	2.77601	0.00550313	0.312566
ENSG00000014216	11	65180566	65212006	+	CAPN1	protein_coding	3022.64	0.819989	0.296303	2.7674	0.00565049	0.313903
ENSG00000065000	19	2100988	2164468	-	AP3D1	protein_coding	1035.79	0.792792	0.286529	2.76688	0.00565959	0.313903
ENSG00000141664	18	62523025	62587709	+	ZCCHC2	protein_coding	294.439	0.66144	0.238996	2.76758	0.00564743	0.313903
ENSG00000204389	6	31815543	31817946	+	HSPA1A	protein_coding	4387.03	0.852068	0.307777	2.76846	0.00563219	0.313903
ENSG00000006327	16	3018445	3022383	+	TNFRSF12A	protein_coding	843.632	1.13297	0.409956	2.76363	0.00571616	0.315148
ENSG00000196588	22	40410281	40636719	-	MRTFA	protein_coding	188.503	0.853484	0.308885	2.76312	0.00572524	0.315148
ENSG00000131759	17	40309180	40357643	+	RARA	protein_coding	125.738	1.0114	0.366694	2.75817	0.00581266	0.318757
ENSG00000024422	19	47713422	47743134	+	EHD2	protein_coding	371.502	1.03883	0.377049	2.75516	0.00586635	0.319029
ENSG00000099995	22	30331988	30356919	-	SF3A1	protein_coding	526.788	0.891429	0.32366	2.75422	0.00588324	0.319029
ENSG00000105447	19	48445841	48457022	+	GRWD1	protein_coding	263.897	0.762518	0.276737	2.75539	0.0058623	0.319029
ENSG00000070814	5	150357629	150400308	+	TCOF1	protein_coding	169.647	0.629211	0.22876	2.75053	0.0059499	0.319085
ENSG00000103187	16	84565596	84618078	-	COTL1	protein_coding	156.257	1.36239	0.494949	2.75258	0.00591275	0.319085
ENSG00000188290	1	998962	1000172	-	HES4	protein_coding	799.118	0.876147	0.318413	2.7516	0.00593041	0.319085
ENSG00000181396	17	82389210	82418637	-	OGFOD3	protein_coding	136.081	1.0393	0.378246	2.74768	0.00600185	0.320692
ENSG00000141448	18	22169392	22202528	+	GATA6	protein_coding	52.0452	1.21258	0.442646	2.7394	0.0061552	0.327686
ENSG00000159840	7	143381295	143391111	+	ZYX	protein_coding	825.367	0.864208	0.315679	2.73762	0.00618854	0.328263
ENSG00000131653	16	2155698	2178129	+	TRAF7	protein_coding	747.241	0.741883	0.271644	2.73108	0.00631273	0.333637
ENSG00000163050	1	226897536	226987545	+	COQ8A	protein_coding	230.541	0.507235	0.185968	2.72754	0.00638087	0.336021
ENSG00000174007	3	196706277	196712250	-	CEP19	protein_coding	168.947	-0.496557	0.182332	-2.72337	0.00646196	0.339067
ENSG00000075624	7	5527148	5563784	-	ACTB	protein_coding	15927.9	1.47722	0.543129	2.71984	0.00653144	0.339695
ENSG00000116273	1	6613731	6624030	+	PHF13	protein_coding	178.627	0.856946	0.315553	2.7157	0.00661366	0.339695
ENSG00000130202	19	44846175	44889223	+	NECTIN2	protein_coding	990.085	1.01088	0.371985	2.71752	0.00657731	0.339695
ENSG00000135074	5	157395534	157575775	-	ADAM19	protein_coding	33.5318	3.73902	1.37649	2.71635	0.0066007	0.339695
ENSG00000169692	9	136673143	136687457	-	AGPAT2	protein_coding	464.155	0.672498	0.247525	2.71689	0.00658993	0.339695
ENSG00000188157	1	1020120	1056118	+	AGRN	protein_coding	2488.08	1.0337	0.380415	2.71729	0.00658181	0.339695
ENSG00000125835	20	2461634	2470853	-	SNRPB	protein_coding	641.866	0.449182	0.165733	2.71028	0.00672268	0.344083
ENSG00000079257	3	158645822	158672648	-	LXN	protein_coding	990.082	-0.459077	0.16983	-2.70316	0.00686842	0.348581
ENSG00000100345	22	36281277	36388067	-	MYH9	protein_coding	3329.48	1.33828	0.494779	2.7048	0.00683456	0.348581
ENSG00000198133	14	67447084	67533739	-	TMEM229B	protein_coding	126.913	1.07264	0.396907	2.70249	0.00688224	0.348581
ENSG00000165175	X	38801432	38806537	+	MID1IP1	protein_coding	1025.88	0.704204	0.260999	2.69811	0.00697347	0.351979
ENSG00000158470	20	49632945	49713878	-	B4GALT5	protein_coding	3955.84	1.03272	0.382982	2.69653	0.00700665	0.352435
ENSG00000137409	6	36968141	36986298	-	MTCH1	protein_coding	1613.26	0.689512	0.255967	2.69375	0.00706525	0.354161
ENSG00000125398	17	72121020	72126416	+	SOX9	protein_coding	302.65	2.1504	0.80212	2.68089	0.00734259	0.365551
ENSG00000197892	8	29067278	29263124	-	KIF13B	protein_coding	637.93	1.0156	0.378681	2.68194	0.00731971	0.365551
ENSG00000177731	17	18244815	18258738	-	FLII	protein_coding	1618.06	0.822674	0.30748	2.67553	0.00746105	0.370185
ENSG00000280334	16	67006672	67009481	-	AC009084.2	TEC	51.1783	-1.01425	0.37933	-2.67379	0.00749984	0.370848
ENSG00000136811	9	128455186	128501292	+	ODF2	protein_coding	1116.45	-0.486718	0.182132	-2.67233	0.00753258	0.371209
ENSG00000080031	19	55181247	55209506	-	PTPRH	protein_coding	298.269	0.867237	0.325123	2.66742	0.00764371	0.371982
ENSG00000114019	3	134355874	134375479	-	AMOTL2	protein_coding	596.398	0.762241	0.285733	2.66766	0.00763804	0.371982
ENSG00000167658	19	3976056	3985463	-	EEF2	protein_coding	14689.3	0.95603	0.358449	2.66713	0.00765028	0.371982
ENSG00000246339	8	28690215	28702030	-	EXTL3-AS1	lncRNA	46.4737	-0.907667	0.340008	-2.66955	0.00759537	0.371982
ENSG00000072958	19	16197578	16245907	+	AP1M1	protein_coding	183.597	0.89274	0.335453	2.6613	0.00778401	0.377227
ENSG00000120129	5	172768096	172771195	-	DUSP1	protein_coding	5258.69	0.704354	0.264812	2.65982	0.00781818	0.377628
ENSG00000067066	2	230415942	230545606	+	SP100	protein_coding	1753.74	0.59529	0.224122	2.6561	0.00790512	0.380568
ENSG00000102032	X	153935269	153944687	-	RENBP	protein_coding	25.5814	2.40525	0.907449	2.65056	0.00803582	0.385587
ENSG00000112531	6	163414000	163578592	+	QKI	protein_coding	681.594	0.466135	0.176362	2.64306	0.00821601	0.390286
ENSG00000115234	2	27370496	27377535	+	SNX17	protein_coding	593.997	0.706379	0.267302	2.64262	0.00822664	0.390286
ENSG00000148841	10	104309698	104338465	-	ITPRIP	protein_coding	755.314	1.06082	0.401514	2.64204	0.00824077	0.390286
ENSG00000160789	1	156082573	156140089	+	LMNA	protein_coding	2510.69	0.696581	0.263495	2.64362	0.0082025	0.390286
ENSG00000112033	6	35342558	35428191	+	PPARD	protein_coding	421.108	0.59315	0.224774	2.63888	0.00831808	0.391618
ENSG00000128383	22	38952741	38992778	+	APOBEC3A	protein_coding	223.452	2.14225	0.811861	2.63869	0.00832259	0.391618
ENSG00000013364	16	29820394	29848039	+	MVP	protein_coding	2447.63	0.617912	0.234375	2.63642	0.00837856	0.392984
ENSG00000102119	X	154379273	154381523	+	EMD	protein_coding	241.696	0.933947	0.354481	2.63469	0.00842152	0.393733
ENSG00000104824	19	38836388	38852347	-	HNRNPL	protein_coding	1163.03	0.410209	0.155922	2.63087	0.00851676	0.39565
ENSG00000136449	17	50508384	50531501	+	MYCBPAP	protein_coding	233.659	-0.536865	0.204034	-2.63125	0.00850715	0.39565
ENSG00000064601	20	45890144	45898820	+	CTSA	protein_coding	498.318	0.97718	0.371609	2.62959	0.00854878	0.395876
ENSG00000119333	9	128633661	128656787	-	WDR34	protein_coding	817.068	0.610033	0.232356	2.62543	0.00865396	0.396189
ENSG00000151929	10	119651370	119677819	+	BAG3	protein_coding	1084.96	0.835134	0.317792	2.62793	0.0085907	0.396189
ENSG00000168404	16	74671855	74700960	-	MLKL	protein_coding	130.548	0.917019	0.349233	2.62581	0.00864441	0.396189
ENSG00000175220	11	46677080	46700619	-	ARHGAP1	protein_coding	499.772	0.794672	0.302729	2.62503	0.00866418	0.396189
ENSG00000110092	11	69641156	69654474	+	CCND1	protein_coding	1632.21	1.93523	0.738191	2.62159	0.00875211	0.398959
ENSG00000105438	19	48382575	48391551	-	KDELR1	protein_coding	1114.44	0.995344	0.38031	2.61719	0.00886575	0.401221
ENSG00000132471	17	75845699	75856507	-	WBP2	protein_coding	1166.11	0.865076	0.330626	2.61648	0.00888423	0.401221
ENSG00000177337	18	3593732	3598363	+	DLGAP1-AS1	lncRNA	144.466	-0.590908	0.225717	-2.61792	0.00884688	0.401221
ENSG00000189114	19	45178784	45216933	+	BLOC1S3	protein_coding	59.3894	1.27961	0.489598	2.6136	0.00895943	0.403368
ENSG00000147883	9	22002903	22009305	-	CDKN2B	protein_coding	551.524	1.09977	0.421189	2.6111	0.00902506	0.40383
ENSG00000183018	17	4498881	4539035	+	SPNS2	protein_coding	529.446	0.980879	0.37565	2.61115	0.00902389	0.40383
ENSG00000187134	10	4963253	4983283	+	AKR1C1	protein_coding	4455.22	-0.813067	0.312173	-2.60454	0.00919977	0.410388
ENSG00000183044	16	8674596	8784575	+	ABAT	protein_coding	113.178	0.736549	0.283041	2.60227	0.00926099	0.410608
ENSG00000253339	8	73358670	73364212	+	AC111149.2	lncRNA	386.887	-0.84703	0.325469	-2.60249	0.00925497	0.410608
ENSG00000027847	5	177600132	177610330	+	B4GALT7	protein_coding	184.915	0.731485	0.281369	2.59973	0.0093296	0.4114
ENSG00000114867	3	184314495	184335358	+	EIF4G1	protein_coding	2300.31	0.842909	0.324258	2.5995	0.00933585	0.4114
ENSG00000189143	7	73799542	73832693	+	CLDN4	protein_coding	7822.47	0.744256	0.286419	2.59849	0.00936346	0.4114
ENSG00000137076	9	35696948	35732195	-	TLN1	protein_coding	812.795	0.895607	0.344969	2.5962	0.00942613	0.41291
ENSG00000047849	3	47850690	48089272	-	MAP4	protein_coding	1133.56	0.841858	0.324677	2.59291	0.00951673	0.413157
ENSG00000115756	2	10302889	10427617	+	HPCAL1	protein_coding	76.1951	0.855719	0.329897	2.5939	0.00948943	0.413157
ENSG00000132024	19	13906201	13930879	+	CC2D1A	protein_coding	418.798	0.756783	0.291834	2.59319	0.0095089	0.413157
ENSG00000088247	19	6413348	6424794	-	KHSRP	protein_coding	548.787	0.856426	0.331873	2.58058	0.00986343	0.426937
ENSG00000156587	11	57551656	57568284	-	UBE2L6	protein_coding	1957.84	0.658517	0.255598	2.57638	0.00998417	0.430885
ENSG00000075945	1	169921326	170085208	-	KIFAP3	protein_coding	838.747	-0.378789	0.147347	-2.57073	0.0101486	0.432858
ENSG00000113594	5	38474668	38608354	-	LIFR	protein_coding	389.698	0.795584	0.309291	2.57228	0.010103	0.432858
ENSG00000168159	1	228487382	228496188	+	RNF187	protein_coding	455.101	1.01462	0.394375	2.57272	0.0100903	0.432858
ENSG00000185896	13	113297239	113323672	+	LAMP1	protein_coding	1866.58	0.898213	0.349389	2.57081	0.0101461	0.432858
ENSG00000100889	14	24094053	24110598	+	PCK2	protein_coding	181.862	0.869647	0.338538	2.56884	0.0102041	0.433957
ENSG00000022840	12	120533480	120577588	+	RNF10	protein_coding	1464.41	0.619852	0.241627	2.56532	0.0103079	0.435151
ENSG00000064393	7	139561570	139777998	-	HIPK2	protein_coding	773.086	0.926774	0.361476	2.56386	0.0103515	0.435151
ENSG00000165949	14	94104836	94116698	+	IFI27	protein_coding	1940.9	1.47872	0.576429	2.56531	0.0103084	0.435151
ENSG00000179051	1	17406760	17439677	-	RCC2	protein_coding	992.367	0.627099	0.244587	2.56391	0.0103501	0.435151
ENSG00000185215	14	103123442	103137439	+	TNFAIP2	protein_coding	1508.31	1.00932	0.393985	2.56182	0.0104127	0.436464
ENSG00000145439	4	168863770	169010275	-	CBR4	protein_coding	772.824	-0.3587	0.140369	-2.55541	0.0106063	0.443308
ENSG00000135048	9	71683366	71816690	-	CEMIP2	protein_coding	712.714	0.363082	0.142259	2.55227	0.0107023	0.444823
ENSG00000234127	6	30184455	30213427	-	TRIM26	protein_coding	445.027	0.541532	0.21218	2.55223	0.0107036	0.444823
ENSG00000043143	5	134524312	134583230	+	JADE2	protein_coding	390.729	0.672653	0.264423	2.54386	0.0109636	0.446586
ENSG00000070404	19	676392	683392	+	FSTL3	protein_coding	102.205	1.28026	0.502648	2.54704	0.0108641	0.446586
ENSG00000123240	10	13099449	13138308	+	OPTN	protein_coding	2199.64	0.576022	0.226337	2.54497	0.0109288	0.446586
ENSG00000126254	19	35629030	35637686	+	RBM42	protein_coding	387.524	0.687112	0.270199	2.54299	0.0109909	0.446586
ENSG00000141522	17	81867721	81871378	-	ARHGDIA	protein_coding	454.264	1.04591	0.410457	2.54815	0.0108295	0.446586
ENSG00000155749	2	201288271	201357398	-	FLACC1	protein_coding	331.425	-0.522936	0.205409	-2.54583	0.0109018	0.446586
ENSG00000161955	17	7558292	7561608	+	TNFSF13	protein_coding	57.6731	1.24338	0.488016	2.54784	0.0108394	0.446586
ENSG00000164181	5	60751791	60844274	-	ELOVL7	protein_coding	167.177	0.869003	0.3417	2.54318	0.010985	0.446586
ENSG00000197324	14	22871740	22881713	+	LRP10	protein_coding	2402.46	0.968646	0.381163	2.54129	0.0110443	0.44751
ENSG00000076924	19	7619525	7629545	-	XAB2	protein_coding	292.2	0.647398	0.254938	2.53943	0.0111034	0.448656
ENSG00000112699	6	1623806	2245605	-	GMDS	protein_coding	753.28	0.781674	0.30824	2.53593	0.0112151	0.450673
ENSG00000173950	3	195068284	195271159	-	XXYLT1	protein_coding	125.622	0.803114	0.316575	2.53688	0.0111844	0.450673
ENSG00000005108	7	11370365	11832198	-	THSD7A	protein_coding	60.9341	1.83032	0.722475	2.5334	0.0112961	0.45102
ENSG00000175467	11	65961728	65980137	+	SART1	protein_coding	272.888	0.790414	0.31204	2.53305	0.0113075	0.45102
ENSG00000178531	19	7924491	7926135	-	CTXN1	protein_coding	427.375	0.926962	0.365987	2.53277	0.0113165	0.45102
ENSG00000184470	22	19875517	19941820	-	TXNRD2	protein_coding	162.532	0.60481	0.238921	2.53142	0.0113603	0.451531
ENSG00000140406	15	81000923	81005788	+	TLNRD1	protein_coding	171.48	1.06887	0.423159	2.52593	0.0115391	0.457079
ENSG00000167996	11	61959718	61967634	-	FTH1	protein_coding	3109.87	0.895367	0.354569	2.52522	0.0115625	0.457079
ENSG00000121380	12	12049844	12211084	+	BCL2L14	protein_coding	208.88	0.636976	0.252546	2.52222	0.0116617	0.459505
ENSG00000148335	9	129608884	129636131	+	NTMT1	protein_coding	76.8417	0.783977	0.311388	2.51769	0.0118129	0.459505
ENSG00000167323	11	3854527	4093210	+	STIM1	protein_coding	636.95	0.734281	0.291337	2.52038	0.0117228	0.459505
ENSG00000185436	1	24154168	24187959	-	IFNLR1	protein_coding	99.1108	0.785856	0.311978	2.51895	0.0117707	0.459505
ENSG00000188021	X	56563639	56567868	+	UBQLN2	protein_coding	499.01	0.718999	0.285403	2.51924	0.0117609	0.459505
ENSG00000196961	19	49766968	49807113	+	AP2A1	protein_coding	613.258	0.770549	0.305952	2.51853	0.0117847	0.459505
ENSG00000143369	1	150508062	150513789	+	ECM1	protein_coding	1071.49	1.59055	0.632575	2.5144	0.0119235	0.461348
ENSG00000183020	11	924894	1012245	+	AP2A2	protein_coding	504.263	0.638623	0.25392	2.51506	0.0119013	0.461348
ENSG00000133816	11	12094008	12359144	+	MICAL2	protein_coding	491.555	0.695687	0.276901	2.5124	0.0119913	0.462202
ENSG00000167984	16	3539033	3577403	-	NLRC3	protein_coding	254.381	-0.543864	0.216516	-2.51188	0.012009	0.462202
ENSG00000139410	12	113422380	113438276	+	SDSL	protein_coding	65.5048	0.966398	0.385267	2.50839	0.0121283	0.465569
ENSG00000049246	1	7784320	7845177	+	PER3	protein_coding	503.816	0.729339	0.29127	2.50399	0.01228	0.46648
ENSG00000104044	15	27754875	28099315	-	OCA2	protein_coding	207.072	-0.963894	0.384681	-2.5057	0.0122209	0.46648
ENSG00000104880	19	7395113	7472484	+	ARHGEF18	protein_coding	225.063	0.895758	0.357729	2.50401	0.0122795	0.46648
ENSG00000136114	13	52377167	52416373	-	THSD1	protein_coding	68.8219	0.966077	0.385403	2.50667	0.0121875	0.46648
ENSG00000145819	5	142770377	143229011	+	ARHGAP26	protein_coding	166.201	0.905664	0.362439	2.4988	0.0124613	0.472138
ENSG00000122359	10	80150889	80205572	-	ANXA11	protein_coding	3242.6	0.678052	0.271716	2.49544	0.0125801	0.474559
ENSG00000197568	1	70354805	70385339	+	HHLA3	protein_coding	119.523	-0.497541	0.199403	-2.49515	0.0125903	0.474559
ENSG00000149418	11	130159782	130210362	+	ST14	protein_coding	2495.84	0.843953	0.338513	2.49312	0.0126627	0.476058
ENSG00000105655	19	18434388	18438167	-	ISYNA1	protein_coding	439.372	0.82436	0.330978	2.49068	0.0127501	0.476235
ENSG00000166145	15	40844018	40858207	+	SPINT1	protein_coding	3271.79	0.89825	0.36047	2.49188	0.0127067	0.476235
ENSG00000213445	11	65638101	65650918	+	SIPA1	protein_coding	298.787	0.828257	0.3326	2.49025	0.0127653	0.476235
ENSG00000142634	1	15409888	15430339	+	EFHD2	protein_coding	1464.18	0.782598	0.314385	2.4893	0.0127996	0.476294
ENSG00000146232	6	44258166	44265788	-	NFKBIE	protein_coding	345.732	0.637594	0.257001	2.4809	0.0131053	0.486429
ENSG00000130402	19	38647649	38731589	+	ACTN4	protein_coding	5622.09	0.724178	0.292082	2.47936	0.0131618	0.487287
ENSG00000184232	11	120211032	120230334	+	OAF	protein_coding	225.697	0.736458	0.297287	2.47726	0.0132395	0.488921
ENSG00000257923	7	101815904	102283958	+	CUX1	protein_coding	846.322	0.641999	0.259338	2.47553	0.013304	0.490063
ENSG00000087365	11	66050729	66069308	+	SF3B2	protein_coding	1572.1	0.63443	0.256738	2.47112	0.013469	0.493648
ENSG00000110048	11	59574398	59615774	-	OSBP	protein_coding	640.254	0.636753	0.257638	2.4715	0.0134548	0.493648
ENSG00000068308	X	48922028	48958386	-	OTUD5	protein_coding	498.194	0.55633	0.225508	2.46701	0.0136247	0.494072
ENSG00000145555	5	16661907	16936288	-	MYO10	protein_coding	731.569	0.65454	0.265257	2.46757	0.0136033	0.494072
ENSG00000173706	3	124965710	125055997	-	HEG1	protein_coding	145.714	1.19196	0.483257	2.46652	0.0136434	0.494072
ENSG00000185880	15	44728988	44767829	+	TRIM69	protein_coding	697.384	0.582657	0.236243	2.46635	0.0136499	0.494072
ENSG00000275395	19	39863323	39934626	-	FCGBP	protein_coding	185.439	2.42707	0.983998	2.46654	0.0136426	0.494072
ENSG00000079999	19	10486125	10503558	-	KEAP1	protein_coding	428.844	0.647573	0.26296	2.46263	0.0137921	0.495674
ENSG00000137216	6	44126914	44155519	+	TMEM63B	protein_coding	957.422	0.653952	0.265538	2.46274	0.013788	0.495674
ENSG00000168887	2	85605254	85612066	-	C2orf68	protein_coding	371.835	-0.408908	0.166052	-2.46253	0.0137961	0.495674
ENSG00000123095	12	26120030	26125037	-	BHLHE41	protein_coding	148.644	1.25187	0.509533	2.4569	0.0140142	0.496567
ENSG00000130487	22	50545899	50551023	+	KLHDC7B	protein_coding	31.0118	2.00829	0.817831	2.45563	0.0140639	0.496567
ENSG00000152778	10	89414568	89420997	+	IFIT5	protein_coding	827.661	0.848147	0.345447	2.45521	0.0140801	0.496567
ENSG00000165923	11	47659591	47715389	-	AGBL2	protein_coding	1033.75	-0.398915	0.162312	-2.45771	0.0139824	0.496567
ENSG00000167113	9	128322544	128334072	+	COQ4	protein_coding	690.969	0.39761	0.161967	2.45488	0.0140933	0.496567
ENSG00000167930	16	234521	272183	+	FAM234A	protein_coding	390.562	0.864549	0.35215	2.45506	0.0140863	0.496567
ENSG00000184897	3	129314771	129316286	-	H1-10	protein_coding	697.667	0.80952	0.329649	2.4557	0.0140611	0.496567
ENSG00000254986	11	66480013	66509657	+	DPP3	protein_coding	318.364	0.832049	0.338343	2.45919	0.0139251	0.496567
ENSG00000106346	7	6104884	6161564	+	USP42	protein_coding	147.447	0.643784	0.262533	2.4522	0.0141984	0.496702
ENSG00000116260	1	180154869	180204030	+	QSOX1	protein_coding	1841.67	0.838585	0.341907	2.45267	0.0141799	0.496702
ENSG00000205937	16	2253116	2268397	-	RNPS1	protein_coding	694.869	0.483264	0.197075	2.45218	0.0141993	0.496702
ENSG00000146233	6	46549580	46652830	-	CYP39A1	protein_coding	219.112	-0.611476	0.249562	-2.4502	0.0142778	0.498254
ENSG00000131508	5	139526431	139628434	+	UBE2D2	protein_coding	734.185	0.453151	0.185133	2.4477	0.0143772	0.500524
ENSG00000130669	19	39125770	39182816	+	PAK4	protein_coding	547.438	0.743875	0.304305	2.44451	0.0145051	0.503774
ENSG00000182010	10	62183035	62268844	-	RTKN2	protein_coding	312.314	0.831097	0.340315	2.44214	0.0146005	0.504992
ENSG00000185236	19	8389981	8404434	+	RAB11B	protein_coding	634.668	0.6468	0.264873	2.44192	0.0146093	0.504992
ENSG00000143368	1	149923317	149927803	-	SF3B4	protein_coding	287.216	0.763396	0.312732	2.44106	0.0146443	0.505004
ENSG00000198355	22	49960768	49964072	+	PIM3	protein_coding	2013.24	0.835373	0.342437	2.4395	0.0147078	0.505997
ENSG00000103202	16	396725	410367	+	NME4	protein_coding	311.911	0.932253	0.382749	2.43568	0.0148639	0.506077
ENSG00000112149	6	14117256	14136918	+	CD83	protein_coding	33.6889	1.42611	0.586725	2.43063	0.0150727	0.506077
ENSG00000120899	8	27311482	27459391	+	PTK2B	protein_coding	501.681	0.608561	0.250419	2.43017	0.0150918	0.506077
ENSG00000124256	20	57603846	57620576	-	ZBP1	protein_coding	29.6402	5.86717	2.41111	2.43339	0.0149582	0.506077
ENSG00000129667	17	76470891	76501790	-	RHBDF2	protein_coding	445.575	0.964848	0.397001	2.43034	0.0150847	0.506077
ENSG00000131043	20	36236459	36270918	+	AAR2	protein_coding	605.205	-0.404307	0.166045	-2.43493	0.0148947	0.506077
ENSG00000139289	12	76025447	76033932	-	PHLDA1	protein_coding	586.233	0.918249	0.37697	2.43587	0.0148562	0.506077
ENSG00000178719	8	143990056	143993415	+	GRINA	protein_coding	863.35	0.981048	0.403236	2.43294	0.0149769	0.506077
ENSG00000197081	6	159969099	160113507	+	IGF2R	protein_coding	1104.25	0.833754	0.342252	2.43608	0.0148474	0.506077
ENSG00000215271	14	23272422	23299447	-	HOMEZ	protein_coding	192.238	0.722944	0.297285	2.43182	0.0150232	0.506077
ENSG00000269967	1	31851913	31921841	-	AL136115.2	lncRNA	37.8328	-1.88261	0.772427	-2.43726	0.014799	0.506077
ENSG00000116514	1	32936445	32964685	-	RNF19B	protein_coding	835.411	0.694302	0.285849	2.42892	0.0151441	0.506666
ENSG00000151748	14	50632058	50668306	-	SAV1	protein_coding	195.493	0.768396	0.316626	2.42683	0.0152316	0.508428
ENSG00000085117	11	44564427	44620358	+	CD82	protein_coding	810.98	0.751498	0.310192	2.42268	0.0154063	0.508443
ENSG00000105894	7	137227341	137343774	-	PTN	protein_coding	99.0459	-1.02302	0.422216	-2.42299	0.0153935	0.508443
ENSG00000126934	19	4090321	4124129	-	MAP2K2	protein_coding	681.921	0.669524	0.276213	2.42394	0.0153529	0.508443
ENSG00000156232	15	82809628	82836108	+	WHAMM	protein_coding	265.601	0.712238	0.293671	2.42529	0.0152963	0.508443
ENSG00000253958	8	8701937	8704096	+	CLDN23	protein_coding	118.815	0.901313	0.371926	2.42337	0.0153775	0.508443
ENSG00000110047	11	64851642	64888296	-	EHD1	protein_coding	538.741	1.01437	0.419132	2.42016	0.0155136	0.510828
ENSG00000167105	17	50271406	50281485	+	TMEM92	protein_coding	54.6821	1.12755	0.466322	2.41796	0.0156077	0.512596
ENSG00000172426	6	43645036	43672600	+	RSPH9	protein_coding	1091.04	-0.469079	0.194054	-2.41727	0.0156376	0.512596
ENSG00000110717	11	68030617	68036644	+	NDUFS8	protein_coding	514.233	0.532773	0.221105	2.40959	0.0159704	0.515399
ENSG00000112304	6	24667035	24705065	+	ACOT13	protein_coding	341.406	-0.42271	0.175382	-2.41022	0.015943	0.515399
ENSG00000152763	1	66812885	66924856	-	WDR78	protein_coding	2719.58	-0.394684	0.163653	-2.41172	0.0158775	0.515399
ENSG00000161013	5	179797597	179806952	-	MGAT4B	protein_coding	1014.35	0.68186	0.282458	2.41402	0.0157774	0.515399
ENSG00000166289	19	29665459	29675477	+	PLEKHF1	protein_coding	79.4751	1.16176	0.481828	2.41115	0.0159024	0.515399
ENSG00000188313	3	146515180	146544856	-	PLSCR1	protein_coding	2994.75	0.55518	0.230312	2.41056	0.0159283	0.515399
ENSG00000196872	2	98793846	98936259	-	KIAA1211L	protein_coding	601.203	0.876293	0.363354	2.41168	0.0158792	0.515399
ENSG00000100218	22	23059415	23145021	-	RSPH14	protein_coding	326.573	-0.674567	0.280287	-2.4067	0.0160973	0.516771
ENSG00000156639	6	37819727	38154624	+	ZFAND3	protein_coding	918.487	0.689304	0.286469	2.40621	0.0161192	0.516771
ENSG00000186973	1	43145153	43156396	+	FAM183A	protein_coding	1593.04	-0.49094	0.204003	-2.40654	0.0161045	0.516771
ENSG00000243449	4	2041993	2043970	+	C4orf48	protein_coding	201.327	0.779937	0.324469	2.40373	0.0162286	0.519138
ENSG00000130939	1	10032832	10181239	+	UBE4B	protein_coding	490.323	0.563265	0.234787	2.39905	0.0164379	0.524681
ENSG00000155034	7	5431335	5513809	-	FBXL18	protein_coding	93.5821	0.835446	0.348566	2.39681	0.0165384	0.526737
ENSG00000006118	11	60924463	60937159	+	TMEM132A	protein_coding	1066.55	0.801893	0.335055	2.39331	0.0166969	0.52704
ENSG00000020577	14	54566117	54793315	+	SAMD4A	protein_coding	141.72	0.8832	0.369291	2.39161	0.0167746	0.52704
ENSG00000091513	3	133746040	133796641	+	TF	protein_coding	512.334	-0.88083	0.368386	-2.39105	0.0168001	0.52704
ENSG00000150456	13	20728731	20773961	-	EEF1AKMT1	protein_coding	205.634	-0.544208	0.227678	-2.39025	0.016837	0.52704
ENSG00000157881	1	2508537	2526611	-	PANK4	protein_coding	252.154	0.485676	0.203108	2.39123	0.0167922	0.52704
ENSG00000160445	9	128729786	128772414	-	ZER1	protein_coding	542.884	0.680628	0.284526	2.39215	0.01675	0.52704
ENSG00000185404	2	230327184	230403732	+	SP140L	protein_coding	337.068	0.531269	0.222257	2.39034	0.0168329	0.52704
ENSG00000249715	2	96642737	96704887	+	FER1L5	protein_coding	117.995	-0.629362	0.262781	-2.39501	0.01662	0.52704
ENSG00000139722	12	122865330	122896127	-	VPS37B	protein_coding	429.22	0.75173	0.314643	2.38915	0.0168874	0.527486
ENSG00000010219	12	4562204	4615302	+	DYRK4	protein_coding	198.732	-0.457165	0.191487	-2.38745	0.0169657	0.527673
ENSG00000146592	7	28299321	28825894	+	CREB5	protein_coding	28.4899	1.93786	0.811557	2.38783	0.0169482	0.527673
ENSG00000137745	11	102942995	102955732	-	MMP13	protein_coding	1452.13	0.812471	0.340633	2.38518	0.0170707	0.529808
ENSG00000125505	19	54173412	54189882	-	MBOAT7	protein_coding	758.381	0.888838	0.373418	2.38028	0.0172995	0.534635
ENSG00000244509	22	39014257	39020352	+	APOBEC3C	protein_coding	651.219	0.713577	0.299757	2.38052	0.0172882	0.534635
ENSG00000078061	X	47561100	47571920	+	ARAF	protein_coding	350.894	0.52595	0.221579	2.37364	0.0176135	0.537345
ENSG00000100558	14	67386984	67412167	-	PLEK2	protein_coding	207.103	0.71587	0.301584	2.3737	0.0176108	0.537345
ENSG00000153179	12	64507001	64697564	+	RASSF3	protein_coding	252.737	0.484149	0.203772	2.37594	0.0175043	0.537345
ENSG00000156304	21	31671000	31732118	-	SCAF4	protein_coding	276.886	0.513052	0.216276	2.37221	0.0176819	0.537345
ENSG00000159708	16	67326798	67385204	+	LRRC36	protein_coding	227.409	-0.551185	0.232098	-2.37479	0.0175588	0.537345
ENSG00000162191	11	62676498	62679117	-	UBXN1	protein_coding	1389.59	-0.316215	0.133286	-2.37245	0.0176704	0.537345
ENSG00000173153	11	64305497	64316743	+	ESRRA	protein_coding	904.839	0.512321	0.215639	2.37583	0.0175096	0.537345
ENSG00000276045	12	121626550	121642677	+	ORAI1	protein_coding	88.0614	1.1755	0.495143	2.37405	0.017594	0.537345
ENSG00000100403	22	41301525	41360147	+	ZC3H7B	protein_coding	485.567	0.692428	0.292141	2.37019	0.0177791	0.538273
ENSG00000128923	15	58771192	58861900	+	MINDY2	protein_coding	677.011	0.494373	0.208593	2.37004	0.0177862	0.538273
ENSG00000167617	19	54465026	54473296	-	CDC42EP5	protein_coding	628.389	0.711439	0.300308	2.36903	0.0178349	0.538628
ENSG00000102962	16	57358783	57366189	+	CCL22	protein_coding	112.746	2.26406	0.956684	2.36657	0.0179539	0.541103
ENSG00000101473	20	45841721	45857405	-	ACOT8	protein_coding	546.404	-0.474324	0.200604	-2.36447	0.0180556	0.543047
ENSG00000071127	4	10074339	10116949	-	WDR1	protein_coding	2551.86	0.619615	0.263075	2.35528	0.0185087	0.543049
ENSG00000071242	6	166409364	166906451	-	RPS6KA2	protein_coding	243.127	0.891747	0.377557	2.36189	0.0181822	0.543049
ENSG00000112981	5	138115175	138139443	-	NME5	protein_coding	1606.04	-0.442722	0.187711	-2.35853	0.0183475	0.543049
ENSG00000119986	10	97677424	97687241	-	AVPI1	protein_coding	1253.81	-0.518174	0.219858	-2.35686	0.0184303	0.543049
ENSG00000128268	22	39457012	39492194	+	MGAT3	protein_coding	159.364	0.815978	0.34574	2.36009	0.0182705	0.543049
ENSG00000134324	2	11677595	11827409	+	LPIN1	protein_coding	342.536	0.526575	0.223428	2.3568	0.0184333	0.543049
ENSG00000134954	11	128458761	128587558	-	ETS1	protein_coding	363.127	0.758093	0.321148	2.36057	0.0182469	0.543049
ENSG00000162734	1	160205337	160215376	+	PEA15	protein_coding	663.012	0.642816	0.272998	2.35466	0.0185397	0.543049
ENSG00000163291	4	78887127	78939438	-	PAQR3	protein_coding	218.065	0.443104	0.188006	2.35686	0.0184301	0.543049
ENSG00000164746	7	48035511	48061304	+	C7orf57	protein_coding	1106.1	-0.458146	0.194129	-2.36	0.0182747	0.543049
ENSG00000182197	8	117794490	118111853	-	EXT1	protein_coding	330.509	0.530649	0.225276	2.35555	0.0184955	0.543049
ENSG00000198959	20	38127385	38166578	-	TGM2	protein_coding	793.416	2.37417	1.00828	2.35466	0.0185395	0.543049
ENSG00000238227	9	136114581	136118875	-	TMEM250	protein_coding	203.579	0.801385	0.33928	2.36201	0.0181759	0.543049
ENSG00000099812	19	751112	764318	+	MISP	protein_coding	495.507	0.932127	0.396349	2.35178	0.0186836	0.546168
ENSG00000133985	14	70641916	70675366	+	TTC9	protein_coding	1823.22	0.918236	0.390693	2.35028	0.0187595	0.547288
ENSG00000166396	18	63752935	63805376	+	SERPINB7	protein_coding	860.692	0.955308	0.40675	2.34864	0.0188422	0.548604
ENSG00000011304	19	797075	812327	+	PTBP1	protein_coding	2211.16	0.564951	0.240961	2.34457	0.0190489	0.551321
ENSG00000132003	19	13795460	13832230	+	ZSWIM4	protein_coding	220.669	0.728773	0.310671	2.3458	0.0189861	0.551321
ENSG00000179950	8	143816344	143829352	-	PUF60	protein_coding	482.075	0.607192	0.258967	2.34467	0.0190438	0.551321
ENSG00000186471	X	119895837	119920716	+	AKAP14	protein_coding	924.784	-0.48566	0.207243	-2.34343	0.0191074	0.551441
ENSG00000196141	2	200305881	200482264	+	SPATS2L	protein_coding	2470.27	0.38029	0.162308	2.34302	0.0191286	0.551441
ENSG00000130164	19	11089462	11133820	+	LDLR	protein_coding	2796.82	0.755732	0.323179	2.33843	0.0193649	0.55564
ENSG00000154734	21	26835755	26845409	-	ADAMTS1	protein_coding	196.407	0.642253	0.274543	2.33936	0.019317	0.55564
ENSG00000213928	14	24161265	24166565	+	IRF9	protein_coding	71.9366	0.86598	0.370398	2.33797	0.0193886	0.55564
ENSG00000006016	19	18572220	18607741	-	CRLF1	protein_coding	96.6244	0.926625	0.397451	2.33142	0.0197312	0.557452
ENSG00000064655	20	46894624	47188844	+	EYA2	protein_coding	279.746	0.792631	0.339789	2.33271	0.0196632	0.557452
ENSG00000065060	6	34792015	34883138	+	UHRF1BP1	protein_coding	311.119	0.514851	0.22077	2.33207	0.0196968	0.557452
ENSG00000088298	20	35115364	35147336	-	EDEM2	protein_coding	273.068	-0.39845	0.171034	-2.32965	0.0198246	0.557452
ENSG00000092850	1	36084094	36088275	+	TEKT2	protein_coding	1257.95	-0.449814	0.193097	-2.32947	0.0198339	0.557452
ENSG00000134250	1	119911553	120100779	-	NOTCH2	protein_coding	1172.01	0.5973	0.255697	2.33597	0.0194928	0.557452
ENSG00000149115	11	57299638	57324952	-	TNKS1BP1	protein_coding	1200.82	0.701984	0.30125	2.33023	0.0197938	0.557452
ENSG00000176720	2	241551424	241574131	+	BOK	protein_coding	152.495	0.712512	0.305685	2.33087	0.0197601	0.557452
ENSG00000203780	10	125896564	126009592	+	FANK1	protein_coding	1766.88	-0.395684	0.16981	-2.33016	0.0197976	0.557452
ENSG00000280332	19	16356329	16358327	-	AC020917.4	TEC	27.8784	-1.02296	0.43842	-2.33329	0.0196328	0.557452
ENSG00000011422	19	43646095	43670547	-	PLAUR	protein_coding	1388.53	0.769293	0.331006	2.32411	0.0201196	0.560356
ENSG00000064666	19	1026586	1039068	+	CNN2	protein_coding	1078.81	0.874468	0.376835	2.32056	0.0203106	0.560356
ENSG00000110497	11	46396414	46594125	-	AMBRA1	protein_coding	316.851	0.516613	0.222666	2.32012	0.0203343	0.560356
ENSG00000131507	5	142108779	142154440	+	NDFIP1	protein_coding	1425.52	0.511264	0.219797	2.32607	0.0200148	0.560356
ENSG00000154898	17	20321164	20403557	+	CCDC144CP	transcribed_processed_pseudogene	29.3736	1.01622	0.437497	2.32281	0.0201895	0.560356
ENSG00000161905	17	4630919	4642294	-	ALOX15	protein_coding	1879.86	0.752632	0.324383	2.3202	0.0203303	0.560356
ENSG00000162910	1	228106679	228109312	-	MRPL55	protein_coding	296.636	-0.446818	0.192623	-2.31965	0.0203598	0.560356
ENSG00000167191	16	19856691	19886167	-	GPRC5B	protein_coding	66.2819	1.40333	0.604111	2.32297	0.0201807	0.560356
ENSG00000173013	4	7040849	7043001	-	CCDC96	protein_coding	191.276	0.653714	0.281465	2.32254	0.0202037	0.560356
ENSG00000176783	5	179550554	179610012	+	RUFY1	protein_coding	831.522	-0.304659	0.131288	-2.32055	0.0203113	0.560356
ENSG00000176834	12	118063593	118136026	-	VSIG10	protein_coding	160.499	0.590551	0.25434	2.3219	0.0202382	0.560356
ENSG00000136830	9	127505339	127578989	-	NIBAN2	protein_coding	3557.6	0.782672	0.337823	2.31681	0.020514	0.562477
ENSG00000144827	3	111979010	111993368	+	ABHD10	protein_coding	799.132	-0.37525	0.161922	-2.31747	0.0204782	0.562477
ENSG00000034152	17	21284672	21315232	+	MAP2K3	protein_coding	471.765	0.782839	0.33813	2.3152	0.0206021	0.563501
ENSG00000101187	20	62642503	62685785	+	SLCO4A1	protein_coding	88.1612	1.29918	0.561611	2.31331	0.0207054	0.563501
ENSG00000125844	20	17613678	17682295	-	RRBP1	protein_coding	1333.34	0.737749	0.319013	2.3126	0.0207445	0.563501
ENSG00000132256	11	5663195	5938619	-	TRIM5	protein_coding	429.467	0.557849	0.241195	2.31286	0.0207303	0.563501
ENSG00000197858	8	144082590	144086216	+	GPAA1	protein_coding	365.005	0.675312	0.291772	2.31452	0.020639	0.563501
ENSG00000008517	16	3065297	3082192	+	IL32	protein_coding	96.3614	0.914454	0.396391	2.30695	0.0210578	0.567249
ENSG00000122643	7	33014114	33062797	-	NT5C3A	protein_coding	1012.57	0.680549	0.295044	2.3066	0.0210769	0.567249
ENSG00000122705	9	36190856	36304781	+	CLTA	protein_coding	2090.43	0.507816	0.220091	2.3073	0.0210382	0.567249
ENSG00000129925	16	370788	387113	-	PGAP6	protein_coding	598.062	0.776184	0.336329	2.30781	0.0210095	0.567249
ENSG00000135622	2	74654228	74683853	+	SEMA4F	protein_coding	50.8391	1.13802	0.493179	2.30752	0.0210258	0.567249
ENSG00000119650	14	75902136	76084585	+	IFT43	protein_coding	1376.48	-0.475486	0.206345	-2.30432	0.0212045	0.569632
ENSG00000164889	7	151057210	151076526	+	SLC4A2	protein_coding	321.097	0.659568	0.286371	2.3032	0.0212677	0.570279
ENSG00000103653	15	74782057	74803198	+	CSK	protein_coding	415.567	0.727709	0.316224	2.30124	0.0213778	0.572181
ENSG00000106070	7	50590063	50793462	-	GRB10	protein_coding	159.772	0.817948	0.355994	2.29764	0.021582	0.574484
ENSG00000166068	15	38252836	38357249	+	SPRED1	protein_coding	216.499	0.540317	0.235061	2.29863	0.021526	0.574484
ENSG00000178764	8	122781655	122974510	+	ZHX2	protein_coding	120.985	0.865418	0.376639	2.29774	0.0215766	0.574484
ENSG00000213085	1	159872364	159900165	-	CFAP45	protein_coding	2390.42	-0.375177	0.163357	-2.29666	0.0216382	0.574929
ENSG00000163874	1	37474580	37484377	+	ZC3H12A	protein_coding	570.891	0.721413	0.314286	2.2954	0.02171	0.575408
ENSG00000171222	20	35953617	35959472	-	SCAND1	protein_coding	340.525	0.703601	0.306585	2.29497	0.0217351	0.575408
ENSG00000076067	12	56521820	56596193	+	RBMS2	protein_coding	1025.9	0.60509	0.263848	2.29333	0.0218289	0.576845
ENSG00000043591	10	114043866	114046904	+	ADRB1	protein_coding	43.46	1.15663	0.504586	2.29224	0.0218918	0.577371
ENSG00000087085	7	100889994	100896974	-	ACHE	protein_coding	39.144	1.5087	0.658356	2.29161	0.021928	0.577371
ENSG00000104856	19	45001449	45038198	+	RELB	protein_coding	99.9049	0.932537	0.407145	2.29043	0.0219963	0.578103
ENSG00000139537	12	48904110	48931840	+	CCDC65	protein_coding	1877.92	-0.435678	0.190272	-2.28976	0.022035	0.578103
ENSG00000160584	11	116843402	117098437	-	SIK3	protein_coding	398.954	0.547667	0.239499	2.28672	0.0222123	0.581706
ENSG00000204138	1	28369582	28500364	+	PHACTR4	protein_coding	667.139	0.466044	0.203913	2.2855	0.0222834	0.582522
ENSG00000106244	7	99392048	99408597	-	PDAP1	protein_coding	657.478	0.490479	0.214824	2.28316	0.0224207	0.585063
ENSG00000175874	2	101345550	101387503	-	CREG2	protein_coding	42.0568	1.47514	0.646526	2.28164	0.0225105	0.586359
ENSG00000070770	16	58157907	58198106	-	CSNK2A2	protein_coding	303.903	0.590988	0.259431	2.27802	0.0227255	0.587745
ENSG00000130479	19	17719242	17734513	+	MAP1S	protein_coding	160.015	0.879545	0.386025	2.27846	0.0226989	0.587745
ENSG00000135736	16	57512181	57536571	-	CCDC102A	protein_coding	47.1309	1.08501	0.476036	2.27925	0.0226521	0.587745
ENSG00000179133	10	23202696	23344845	-	C10orf67	protein_coding	130.13	-0.682502	0.299691	-2.27735	0.0227652	0.587745
ENSG00000188766	19	38388421	38399587	+	SPRED3	protein_coding	22.066	1.45493	0.63862	2.27825	0.0227118	0.587745
ENSG00000174243	12	48829756	48852842	-	DDX23	protein_coding	2013.01	-0.37247	0.163662	-2.27585	0.0228551	0.589024
ENSG00000011485	19	46347087	46392981	+	PPP5C	protein_coding	285.36	0.594696	0.262865	2.26237	0.0236748	0.591343
ENSG00000039068	16	68737292	68835541	+	CDH1	protein_coding	1603.99	0.811626	0.358228	2.26567	0.0234718	0.591343
ENSG00000069399	19	44747705	44760044	+	BCL3	protein_coding	617.027	0.471006	0.208106	2.2633	0.0236172	0.591343
ENSG00000072786	5	172042079	172188224	-	STK10	protein_coding	150.721	0.711428	0.314115	2.26486	0.0235212	0.591343
ENSG00000073792	3	185643739	185825056	-	IGF2BP2	protein_coding	1065.27	0.543997	0.240283	2.26399	0.023575	0.591343
ENSG00000089091	20	18383367	18467281	-	DZANK1	protein_coding	435.072	-0.451653	0.199255	-2.26671	0.0234081	0.591343
ENSG00000111321	12	6375045	6391571	+	LTBR	protein_coding	804.458	0.69067	0.304063	2.27147	0.0231187	0.591343
ENSG00000124787	6	4994717	5004063	-	RPP40	protein_coding	125.114	-0.693356	0.306458	-2.26248	0.0236675	0.591343
ENSG00000132109	11	4384897	4393702	-	TRIM21	protein_coding	454.4	0.636023	0.280616	2.26653	0.0234191	0.591343
ENSG00000132591	17	28855010	28861061	+	ERAL1	protein_coding	427.055	-0.333209	0.147136	-2.26463	0.0235354	0.591343
ENSG00000136802	9	128882112	128918039	+	LRRC8A	protein_coding	5049.64	0.783562	0.346076	2.26413	0.0235661	0.591343
ENSG00000137098	9	35808045	35812272	-	SPAG8	protein_coding	832.814	-0.450616	0.198569	-2.26931	0.0232492	0.591343
ENSG00000149782	11	64251523	64269150	+	PLCB3	protein_coding	363.993	0.706763	0.311735	2.26719	0.0233787	0.591343
ENSG00000161714	17	45108959	45133354	-	PLCD3	protein_coding	641.686	0.817033	0.360627	2.26559	0.0234764	0.591343
ENSG00000168495	8	22245133	22254601	+	POLR3D	protein_coding	340.447	0.439226	0.193447	2.27052	0.0231758	0.591343
ENSG00000172432	6	43605316	43629264	-	GTPBP2	protein_coding	598.291	0.634088	0.279996	2.26464	0.0235351	0.591343
ENSG00000183346	10	61662961	61766766	+	CABCOCO1	protein_coding	1146.55	-0.43932	0.194131	-2.263	0.0236355	0.591343
ENSG00000286061	1	24496254	24535400	-	RCAN3AS	lncRNA	24.2329	-0.941982	0.414479	-2.27269	0.0230449	0.591343
ENSG00000097007	9	130713016	130887675	+	ABL1	protein_coding	294.189	0.763578	0.337919	2.25965	0.0238429	0.59149
ENSG00000130159	19	11505929	11529172	-	ECSIT	protein_coding	182.335	0.593047	0.262268	2.26122	0.0237455	0.59149
ENSG00000184292	1	58575433	58577252	-	TACSTD2	protein_coding	25223.6	0.58565	0.259136	2.26001	0.0238204	0.59149
ENSG00000260708	22	46761894	46762563	-	AL118516.1	lncRNA	35.8315	-1.22626	0.542519	-2.26031	0.0238022	0.59149
ENSG00000069011	5	135027734	135034813	-	PITX1	protein_coding	3453.27	0.661781	0.293052	2.25824	0.0239306	0.591654
ENSG00000140545	15	88898683	88913381	-	MFGE8	protein_coding	377.777	0.940468	0.416366	2.25876	0.0238986	0.591654
ENSG00000120915	8	27490781	27545564	+	EPHX2	protein_coding	442.668	-0.44592	0.197701	-2.25552	0.0241007	0.593755
ENSG00000125430	17	14301081	14349404	+	HS3ST3B1	protein_coding	88.0765	-0.711256	0.315423	-2.25493	0.0241377	0.593755
ENSG00000204580	6	30876421	30900156	+	DDR1	protein_coding	3521.12	0.648944	0.287757	2.25518	0.0241218	0.593755
ENSG00000090372	19	46719511	46746994	-	STRN4	protein_coding	753.197	0.448125	0.199351	2.24792	0.0245813	0.594832
ENSG00000101890	X	109372906	109482086	-	GUCY2F	protein_coding	34.4326	-1.42763	0.634651	-2.24947	0.0244829	0.594832
ENSG00000117691	1	212432920	212446379	+	NENF	protein_coding	317.06	0.691521	0.307374	2.24977	0.0244633	0.594832
ENSG00000130005	19	1397026	1401570	-	GAMT	protein_coding	132.325	0.763697	0.339687	2.24824	0.0245612	0.594832
ENSG00000160570	19	42198598	42220140	-	DEDD2	protein_coding	770.227	0.548164	0.243443	2.25171	0.0243404	0.594832
ENSG00000167987	11	61130257	61161615	-	VPS37C	protein_coding	301.809	0.527127	0.234058	2.25212	0.0243147	0.594832
ENSG00000169710	17	82078338	82098294	-	FASN	protein_coding	4550.11	0.871594	0.38711	2.25154	0.0243513	0.594832
ENSG00000175602	11	65890673	65891635	+	CCDC85B	protein_coding	151.752	0.799107	0.354691	2.25296	0.0242614	0.594832
ENSG00000185361	19	4639516	4655568	+	TNFAIP8L1	protein_coding	586.726	0.620846	0.276202	2.24779	0.0245893	0.594832
ENSG00000185624	17	81843161	81860624	-	P4HB	protein_coding	2605.78	0.820069	0.364513	2.24976	0.024464	0.594832
ENSG00000005483	7	105014190	105115019	+	KMT2E	protein_coding	711.033	0.329666	0.146965	2.24316	0.0248862	0.595766
ENSG00000087074	19	48872421	48876058	+	PPP1R15A	protein_coding	2721.45	0.62995	0.281043	2.24147	0.0249955	0.595766
ENSG00000103876	15	80152490	80186946	+	FAH	protein_coding	274.849	-0.406103	0.180953	-2.24424	0.0248168	0.595766
ENSG00000120889	8	23020133	23069031	-	TNFRSF10B	protein_coding	1143.35	0.482644	0.215221	2.24256	0.0249254	0.595766
ENSG00000124766	6	21593751	21598619	+	SOX4	protein_coding	1430.73	0.693272	0.308717	2.24566	0.024726	0.595766
ENSG00000137801	15	39581079	39599466	+	THBS1	protein_coding	947.349	1.72077	0.767507	2.24203	0.0249594	0.595766
ENSG00000171206	10	102642310	102660680	+	TRIM8	protein_coding	956.587	0.625421	0.278866	2.24273	0.024914	0.595766
ENSG00000177885	17	75318076	75405709	-	GRB2	protein_coding	783.013	0.618347	0.275536	2.24416	0.0248219	0.595766
ENSG00000275342	8	8317736	8386439	-	PRAG1	protein_coding	103.287	1.15475	0.514285	2.24536	0.0247452	0.595766
ENSG00000100364	22	45190338	45240769	-	KIAA0930	protein_coding	687.196	0.765162	0.341682	2.2394	0.02513	0.596051
ENSG00000134287	12	48935723	48957487	-	ARF3	protein_coding	1674.73	0.519796	0.23209	2.23963	0.0251149	0.596051
ENSG00000242802	7	4775615	4794397	+	AP5Z1	protein_coding	301.459	0.579806	0.258899	2.23951	0.025123	0.596051
ENSG00000231925	6	33299694	33314387	-	TAPBP	protein_coding	1332.88	0.732267	0.327119	2.23853	0.0251864	0.596419
ENSG00000067057	10	3066333	3137718	+	PFKP	protein_coding	1343.73	0.679832	0.303975	2.23647	0.0253207	0.598627
ENSG00000175267	16	22092538	22156964	+	VWA3A	protein_coding	1695.11	-0.458975	0.205286	-2.23578	0.025366	0.598727
ENSG00000114315	3	194136148	194138732	+	HES1	protein_coding	1667.6	0.451069	0.201914	2.23397	0.0254852	0.600571
ENSG00000076864	1	21596215	21669363	-	RAP1GAP	protein_coding	143.094	0.882052	0.395241	2.23168	0.0256362	0.601214
ENSG00000153046	6	4706159	4955551	+	CDYL	protein_coding	353.902	0.607585	0.272205	2.23209	0.0256091	0.601214
ENSG00000175130	1	32333839	32336233	-	MARCKSL1	protein_coding	892.342	1.33362	0.597292	2.23278	0.0255632	0.601214
ENSG00000138629	15	74445977	74461182	-	UBL7	protein_coding	434.657	-0.357821	0.160429	-2.2304	0.0257207	0.602228
ENSG00000090020	1	27098809	27166981	-	SLC9A1	protein_coding	552.039	0.814413	0.365599	2.22761	0.0259064	0.604635
ENSG00000185950	13	109752695	109786583	-	IRS2	protein_coding	502.028	0.931411	0.418084	2.22781	0.0258931	0.604635
ENSG00000161791	12	49636499	49708165	-	FMNL3	protein_coding	34.5972	0.834084	0.374627	2.22644	0.0259849	0.605498
ENSG00000119523	9	99216425	99221942	-	ALG2	protein_coding	263.471	0.557085	0.250466	2.22419	0.0261357	0.60804
ENSG00000169223	5	177331567	177351668	-	LMAN2	protein_coding	910.212	0.599012	0.269529	2.22244	0.0262538	0.609814
ENSG00000131016	6	151239967	151358559	+	AKAP12	protein_coding	98.4059	1.92853	0.868242	2.22119	0.0263382	0.610804
ENSG00000011347	11	61513714	61581148	-	SYT7	protein_coding	147.963	1.01994	0.459378	2.22027	0.0264006	0.611278
ENSG00000130175	19	11435288	11450968	+	PRKCSH	protein_coding	808.591	0.691181	0.31149	2.21895	0.0264899	0.611405
ENSG00000148840	10	102132994	102150333	+	PPRC1	protein_coding	141.379	0.669604	0.301726	2.21924	0.0264701	0.611405
ENSG00000167676	19	4502180	4518465	-	PLIN4	protein_coding	71.4708	-0.721436	0.325543	-2.2161	0.0266849	0.614933
ENSG00000129351	19	10654261	10692417	+	ILF3	protein_coding	1382.37	0.428038	0.193335	2.21397	0.0268307	0.617317
ENSG00000006712	19	39385629	39391154	-	PAF1	protein_coding	338.501	0.617456	0.281987	2.18966	0.0285488	0.6179
ENSG00000008130	1	1751232	1780457	-	NADK	protein_coding	728.102	0.682678	0.311741	2.18988	0.0285326	0.6179
ENSG00000017483	X	48458537	48470260	-	SLC38A5	protein_coding	188.724	0.839914	0.379683	2.21215	0.0269565	0.6179
ENSG00000050820	16	75228181	75268053	-	BCAR1	protein_coding	577.127	0.499826	0.228481	2.1876	0.0286985	0.6179
ENSG00000060069	18	79679801	79756623	+	CTDP1	protein_coding	267.899	0.596312	0.272834	2.18562	0.0288434	0.6179
ENSG00000067182	12	6328757	6342114	-	TNFRSF1A	protein_coding	1362.46	0.654912	0.29985	2.18413	0.0289527	0.6179
ENSG00000073008	19	44643798	44666162	+	PVR	protein_coding	180.581	0.695595	0.315621	2.20389	0.0275321	0.6179
ENSG00000073060	12	124776856	124882668	-	SCARB1	protein_coding	180.314	0.852127	0.385282	2.2117	0.0269875	0.6179
ENSG00000075420	3	172039578	172401669	+	FNDC3B	protein_coding	1253.5	0.712496	0.325533	2.18871	0.028618	0.6179
ENSG00000090581	16	1351931	1364113	+	GNPTG	protein_coding	249.828	0.470442	0.215368	2.18437	0.0289353	0.6179
ENSG00000099797	19	14517085	14565980	+	TECR	protein_coding	1222.05	0.589244	0.268633	2.19349	0.0282721	0.6179
ENSG00000100170	22	32043261	32113029	+	SLC5A1	protein_coding	170.781	1.09195	0.495725	2.20274	0.0276133	0.6179
ENSG00000100280	22	29327680	29423179	-	AP1B1	protein_coding	755.907	0.726893	0.332046	2.18913	0.0285873	0.6179
ENSG00000100982	20	45934683	45948023	+	PCIF1	protein_coding	211.237	0.641719	0.293832	2.18396	0.0289649	0.6179
ENSG00000101670	18	49560699	49599185	+	LIPG	protein_coding	215.505	0.830512	0.377893	2.19774	0.0279675	0.6179
ENSG00000102081	X	147911951	147951125	+	FMR1	protein_coding	932.795	0.360893	0.163169	2.21177	0.0269825	0.6179
ENSG00000107738	10	71747556	71773520	-	VSIR	protein_coding	822.804	0.479251	0.218791	2.19045	0.0284917	0.6179
ENSG00000112182	6	89926528	90296908	-	BACH2	protein_coding	22.4056	1.22406	0.560801	2.1827	0.029058	0.6179
ENSG00000113645	5	168291651	168472303	+	WWC1	protein_coding	544.782	0.707429	0.323862	2.18435	0.0289366	0.6179
ENSG00000114450	3	179396088	179451476	-	GNB4	protein_coding	197.13	0.592895	0.271376	2.18477	0.0289055	0.6179
ENSG00000116871	1	36155579	36180849	+	MAP7D1	protein_coding	1263.33	0.78173	0.354668	2.20412	0.0275159	0.6179
ENSG00000117643	1	25617468	25786207	+	MAN1C1	protein_coding	191.986	0.760244	0.345365	2.20128	0.0277164	0.6179
ENSG00000124882	4	74365145	74388749	+	EREG	protein_coding	769.586	0.847814	0.388522	2.18215	0.0290983	0.6179
ENSG00000126391	11	65386621	65413525	+	FRMD8	protein_coding	573.358	0.563591	0.25613	2.20041	0.0277778	0.6179
ENSG00000131446	5	180784782	180815652	-	MGAT1	protein_coding	863.344	0.660253	0.299711	2.20296	0.0275974	0.6179
ENSG00000132359	17	2755705	3037741	+	AC002316.1	protein_coding	52.6396	1.02928	0.465641	2.21046	0.0270734	0.6179
ENSG00000138036	2	43774039	43810010	+	DYNC2LI1	protein_coding	1343.75	-0.374371	0.170047	-2.20157	0.0276958	0.6179
ENSG00000139637	12	53299695	53307177	+	C12orf10	protein_coding	255.392	-0.414621	0.189858	-2.18385	0.0289733	0.6179
ENSG00000144802	3	101827991	101861022	+	NFKBIZ	protein_coding	1418.74	0.558357	0.254729	2.19197	0.0283818	0.6179
ENSG00000147010	X	19533977	19887600	-	SH3KBP1	protein_coding	439.802	0.725441	0.329862	2.19923	0.0278617	0.6179
ENSG00000149658	20	63195429	63216139	-	YTHDF1	protein_coding	303.626	0.62965	0.287822	2.18764	0.028696	0.6179
ENSG00000151726	4	184755595	184826818	-	ACSL1	protein_coding	4073.36	0.414727	0.189614	2.18722	0.0287264	0.6179
ENSG00000152518	2	43222402	43226606	-	ZFP36L2	protein_coding	883.505	0.644376	0.292065	2.20628	0.0273645	0.6179
ENSG00000160932	8	143017982	143023832	+	LY6E	protein_coding	5517.81	0.521829	0.237119	2.2007	0.027757	0.6179
ENSG00000161638	12	54395261	54419266	-	ITGA5	protein_coding	560.116	1.38179	0.626777	2.20459	0.027483	0.6179
ENSG00000162302	11	64359148	64372215	+	RPS6KA4	protein_coding	210.115	0.659567	0.299289	2.20378	0.0275399	0.6179
ENSG00000162814	1	217631324	217871696	+	SPATA17	protein_coding	1012.58	-0.399996	0.180984	-2.21013	0.0270965	0.6179
ENSG00000163517	3	13479724	13506424	+	HDAC11	protein_coding	282.154	0.60904	0.278864	2.184	0.028962	0.6179
ENSG00000170542	6	2887270	2903309	-	SERPINB9	protein_coding	95.7584	1.18227	0.540802	2.18615	0.0288049	0.6179
ENSG00000171604	5	139647299	139683882	+	CXXC5	protein_coding	652.781	0.636995	0.290485	2.19287	0.0283169	0.6179
ENSG00000171992	5	150601080	150659207	+	SYNPO	protein_coding	300.513	0.733571	0.334023	2.19617	0.0280799	0.6179
ENSG00000172361	18	50227193	50266495	-	CFAP53	protein_coding	1382.43	-0.430559	0.194945	-2.20862	0.0272012	0.6179
ENSG00000173451	12	71664301	71680644	+	THAP2	protein_coding	155.319	-0.522003	0.238916	-2.18488	0.0288974	0.6179
ENSG00000175592	11	65892049	65900573	-	FOSL1	protein_coding	226.912	1.05562	0.482329	2.18859	0.0286263	0.6179
ENSG00000176845	17	83079609	83095122	+	METRNL	protein_coding	310.209	0.818702	0.370479	2.20985	0.0271159	0.6179
ENSG00000183077	17	78187317	78207701	+	AFMID	protein_coding	316.036	-0.419112	0.191058	-2.19364	0.0282616	0.6179
ENSG00000183087	13	113820549	113864076	-	GAS6	protein_coding	268.247	0.605151	0.277323	2.18211	0.0291011	0.6179
ENSG00000184792	22	30693782	30907824	+	OSBP2	protein_coding	73.9665	0.796985	0.363481	2.19264	0.0283331	0.6179
ENSG00000188112	6	42101119	42142620	-	C6orf132	protein_coding	1244.5	0.636073	0.291235	2.18406	0.0289581	0.6179
ENSG00000213965	19	32691961	32713796	+	NUDT19	protein_coding	173.082	0.764849	0.347352	2.20194	0.0276695	0.6179
ENSG00000243701	3	107220744	107348464	+	DUBR	lncRNA	289.125	-0.448506	0.205048	-2.18732	0.0287195	0.6179
ENSG00000249082	5	135038831	135040047	-	C5orf66-AS1	lncRNA	118.555	0.728539	0.333867	2.18212	0.0291005	0.6179
ENSG00000261455	7	152463786	152465549	+	LINC01003	lncRNA	57.097	0.787806	0.358771	2.19585	0.028103	0.6179
ENSG00000169991	1	18904280	18956676	-	IFFO2	protein_coding	481.538	0.671186	0.30768	2.18145	0.0291505	0.618049
ENSG00000144867	3	133784023	133825772	+	SRPRB	protein_coding	938.459	-0.448175	0.205815	-2.17757	0.0294382	0.620978
ENSG00000162849	1	245154985	245709432	+	KIF26B	protein_coding	74.3734	1.27251	0.584971	2.17534	0.0296048	0.620978
ENSG00000169871	7	101085481	101097967	+	TRIM56	protein_coding	962.718	0.454732	0.208936	2.17642	0.0295237	0.620978
ENSG00000172403	4	118850688	119061247	+	SYNPO2	protein_coding	67.1248	0.805847	0.370372	2.17578	0.0295719	0.620978
ENSG00000196878	1	209614870	209652425	-	LAMB3	protein_coding	5092.21	1.34636	0.617945	2.17877	0.029349	0.620978
ENSG00000197102	14	101964573	102056443	+	DYNC1H1	protein_coding	2828.51	0.582816	0.26796	2.17501	0.0296292	0.620978
ENSG00000225190	17	45435900	45490749	-	PLEKHM1	protein_coding	715.998	0.488598	0.224568	2.17573	0.0295757	0.620978
ENSG00000234911	14	64341673	64387986	-	TEX21P	transcribed_unitary_pseudogene	66.8907	-0.745683	0.342825	-2.17511	0.029622	0.620978
ENSG00000070423	19	647526	663233	-	RNF126	protein_coding	340.873	0.598022	0.27544	2.17116	0.0299195	0.621392
ENSG00000078902	11	1274371	1309654	-	TOLLIP	protein_coding	586.442	0.605399	0.279256	2.1679	0.0301661	0.621392
ENSG00000131196	18	79395856	79529325	+	NFATC1	protein_coding	48.1098	1.01554	0.467721	2.17124	0.0299127	0.621392
ENSG00000141985	19	4360370	4400547	-	SH3GL1	protein_coding	799.569	0.702593	0.323921	2.16902	0.0300808	0.621392
ENSG00000143373	1	151281618	151292176	+	ZNF687	protein_coding	244.753	0.700084	0.322848	2.16847	0.0301232	0.621392
ENSG00000158856	8	22048995	22082527	+	DMTN	protein_coding	213.798	0.540312	0.249288	2.16742	0.0302027	0.621392
ENSG00000167074	22	41367333	41399326	+	TEF	protein_coding	263.487	0.583621	0.268948	2.17001	0.0300059	0.621392
ENSG00000168528	1	31409565	31434680	+	SERINC2	protein_coding	3097.05	0.793869	0.366189	2.16792	0.0301646	0.621392
ENSG00000173402	3	49468703	49535618	+	DAG1	protein_coding	579.561	0.816393	0.376187	2.17018	0.0299933	0.621392
ENSG00000178773	16	89575758	89597246	+	CPNE7	protein_coding	46.6704	1.01905	0.469932	2.16851	0.0301201	0.621392
ENSG00000184602	16	11668455	11679152	+	SNN	protein_coding	231.285	0.953905	0.439556	2.17016	0.0299949	0.621392
ENSG00000196411	7	100802565	100827523	-	EPHB4	protein_coding	436.347	0.639056	0.294793	2.16781	0.030173	0.621392
ENSG00000225492	1	89407679	89426243	+	GBP1P1	transcribed_unprocessed_pseudogene	129.426	0.985378	0.454597	2.16759	0.0301902	0.621392
ENSG00000170043	17	7930345	7932123	-	TRAPPC1	protein_coding	257.072	0.481042	0.222074	2.16613	0.0303009	0.622332
ENSG00000186222	4	6716174	6717664	+	BLOC1S4	protein_coding	84.3805	0.753992	0.348151	2.1657	0.0303337	0.622332
ENSG00000105559	19	48837097	48868617	-	PLEKHA4	protein_coding	168.827	0.830665	0.383699	2.16488	0.0303966	0.622746
ENSG00000196428	3	150408335	150466431	+	TSC22D2	protein_coding	463.475	0.610397	0.282262	2.16252	0.0305778	0.625579
ENSG00000117362	1	150265399	150269580	-	APH1A	protein_coding	1130.54	0.4852	0.22456	2.16066	0.0307213	0.627635
ENSG00000068323	X	49028726	49043410	-	TFE3	protein_coding	515.395	0.55154	0.255599	2.15783	0.0309408	0.631235
ENSG00000065054	16	2025356	2039026	+	SLC9A3R2	protein_coding	432.563	0.829916	0.385318	2.15384	0.0312524	0.631563
ENSG00000065491	6	37257772	37332970	+	TBC1D22B	protein_coding	411.092	0.446228	0.206959	2.15612	0.0310747	0.631563
ENSG00000065809	10	14518557	14774897	-	FAM107B	protein_coding	3210.14	-0.32041	0.148594	-2.15628	0.0310619	0.631563
ENSG00000104112	15	51681492	51721026	+	SCG3	protein_coding	82.4248	-0.83901	0.389659	-2.15319	0.0313037	0.631563
ENSG00000105229	19	4007736	4039386	+	PIAS4	protein_coding	184.986	0.493773	0.229119	2.15509	0.0311545	0.631563
ENSG00000144061	2	110122311	110205066	-	NPHP1	protein_coding	2357.4	-0.427377	0.198536	-2.15265	0.0313465	0.631563
ENSG00000158480	20	49903391	49915529	-	SPATA2	protein_coding	114.398	0.675104	0.313154	2.15582	0.0310977	0.631563
ENSG00000162545	1	20482391	20486210	-	CAMK2N1	protein_coding	253.513	0.938086	0.435578	2.15366	0.031267	0.631563
ENSG00000185722	17	4163821	4263995	-	ANKFY1	protein_coding	794.144	0.556029	0.258181	2.15364	0.0312682	0.631563
ENSG00000102048	X	15235288	15270467	-	ASB9	protein_coding	81.4306	-0.805912	0.374558	-2.15164	0.0314259	0.632289
ENSG00000101160	20	58995185	59007254	-	CTSZ	protein_coding	346.826	0.800992	0.373167	2.14647	0.0318353	0.636828
ENSG00000126106	1	44635238	44674481	-	TMEM53	protein_coding	316.717	-0.375648	0.175087	-2.14549	0.0319134	0.636828
ENSG00000129250	17	4997950	5028401	+	KIF1C	protein_coding	1064.1	0.73952	0.344344	2.14762	0.0317437	0.636828
ENSG00000132821	20	37903111	37945350	+	VSTM2L	protein_coding	854.038	0.907086	0.422719	2.14584	0.0318861	0.636828
ENSG00000176018	5	90515611	90529584	-	LYSMD3	protein_coding	721.743	-0.329497	0.15341	-2.14781	0.0317285	0.636828
ENSG00000179820	19	53864763	53876435	+	MYADM	protein_coding	317.188	0.961343	0.448019	2.14576	0.0318918	0.636828
ENSG00000135414	12	55743122	55757264	+	GDF11	protein_coding	83.3171	0.81151	0.378346	2.14489	0.0319616	0.636917
ENSG00000070366	17	2059839	2303785	-	SMG6	protein_coding	248.366	0.705411	0.329047	2.1438	0.0320489	0.637786
ENSG00000169180	16	28097979	28211920	-	XPO6	protein_coding	572.673	0.52402	0.24471	2.1414	0.032242	0.640754
ENSG00000118096	11	118544528	118572970	-	IFT46	protein_coding	1636.47	-0.357838	0.167152	-2.1408	0.0322902	0.64084
ENSG00000261221	19	55605405	55617269	+	ZNF865	protein_coding	149.49	0.626986	0.292999	2.13989	0.0323637	0.641425
ENSG00000165591	X	57286706	57489196	+	FAAH2	protein_coding	467.115	-0.496935	0.232287	-2.13931	0.0324104	0.641479
ENSG00000134470	10	5943639	5978187	-	IL15RA	protein_coding	106.952	0.817705	0.382338	2.1387	0.0324603	0.641596
ENSG00000269473	19	58440448	58445849	+	AC012313.8	lncRNA	41.0237	-0.939521	0.439546	-2.13748	0.0325588	0.642673
ENSG00000137267	6	3153666	3157544	-	TUBB2A	protein_coding	91.9224	1.1	0.514827	2.13665	0.0326266	0.643141
ENSG00000168350	14	100143957	100159645	-	DEGS2	protein_coding	218.472	0.569266	0.26677	2.13392	0.0328494	0.646659
ENSG00000021300	11	73646178	73662819	+	PLEKHB1	protein_coding	1225.62	-0.430147	0.201681	-2.13281	0.0329407	0.647583
ENSG00000155506	5	154712843	154817605	+	LARP1	protein_coding	1290.04	0.525034	0.246266	2.13198	0.0330085	0.648041
ENSG00000166578	12	113195441	113221094	-	IQCD	protein_coding	642.524	-0.385838	0.181085	-2.1307	0.0331136	0.64836
ENSG00000169231	1	155195588	155209051	-	THBS3	protein_coding	405.412	-0.442863	0.207801	-2.13119	0.0330736	0.64836
ENSG00000152611	5	35904288	35938779	-	CAPSL	protein_coding	3446.59	-0.422629	0.198566	-2.12841	0.0333031	0.650392
ENSG00000182446	17	81556887	81648465	-	NPLOC4	protein_coding	864.406	0.532909	0.250384	2.12837	0.0333065	0.650392
ENSG00000026950	6	26402237	26415208	+	BTN3A1	protein_coding	372.805	0.465861	0.218984	2.12738	0.0333889	0.651128
ENSG00000131473	17	41866917	41930542	-	ACLY	protein_coding	1139.59	0.614642	0.289154	2.12566	0.0335317	0.65304
ENSG00000115073	2	97655939	97664044	-	ACTR1B	protein_coding	534.598	0.482046	0.226902	2.12447	0.0336311	0.653231
ENSG00000142002	19	4675224	4724673	-	DPP9	protein_coding	322.424	0.678301	0.319269	2.12455	0.0336246	0.653231
ENSG00000020256	20	52051663	52204308	-	ZFP64	protein_coding	92.4143	0.79937	0.376613	2.12253	0.0337937	0.655516
ENSG00000132274	11	5689697	5737089	+	TRIM22	protein_coding	4915.46	0.549433	0.259097	2.12057	0.0339583	0.656962
ENSG00000176994	17	18315293	18328056	+	SMCR8	protein_coding	307.391	0.606439	0.285913	2.12106	0.0339165	0.656962
ENSG00000137309	6	34236873	34246231	+	HMGA1	protein_coding	2412.85	0.788261	0.372164	2.11805	0.0341709	0.659597
ENSG00000143614	1	153789030	153923360	-	GATAD2B	protein_coding	310.123	0.473158	0.223523	2.11682	0.0342753	0.659597
ENSG00000185055	7	105565120	105600875	-	EFCAB10	protein_coding	371.31	-0.348911	0.164817	-2.11696	0.0342635	0.659597
ENSG00000198752	14	102932380	103057549	-	CDC42BPB	protein_coding	980.917	0.589169	0.278272	2.11724	0.0342396	0.659597
ENSG00000163877	1	37534449	37554293	-	SNIP1	protein_coding	199.413	0.536696	0.253861	2.11414	0.0345037	0.662296
ENSG00000174231	17	1650629	1684867	-	PRPF8	protein_coding	1959.24	0.514949	0.243578	2.1141	0.0345064	0.662296
ENSG00000078369	1	1785285	1891117	-	GNB1	protein_coding	2902.64	0.648101	0.306656	2.11345	0.0345626	0.662502
ENSG00000185112	3	194685883	194689037	+	FAM43A	protein_coding	48.5932	1.19325	0.564846	2.11252	0.0346416	0.663145
ENSG00000157985	2	235494043	236131800	+	AGAP1	protein_coding	336.26	0.566696	0.268348	2.1118	0.034704	0.663469
ENSG00000166889	11	59636716	59669037	-	PATL1	protein_coding	721.546	0.440172	0.208579	2.11033	0.0348297	0.665001
ENSG00000125731	19	6752160	6767463	-	SH2D3A	protein_coding	582.364	0.475643	0.225507	2.10921	0.0349261	0.665029
ENSG00000133216	1	22710839	22921500	+	EPHB2	protein_coding	169.709	0.776557	0.368193	2.1091	0.0349359	0.665029
ENSG00000142627	1	16124337	16156069	-	EPHA2	protein_coding	4674.96	0.527183	0.25	2.10873	0.034968	0.665029
ENSG00000105402	19	47487637	47515091	-	NAPA	protein_coding	244.231	0.531352	0.252076	2.10791	0.0350391	0.665514
ENSG00000214756	11	62665309	62668496	+	CSKMT	protein_coding	29.6783	-1.03511	0.49121	-2.10726	0.0350948	0.665706
ENSG00000077942	22	45502238	45601135	+	FBLN1	protein_coding	617.172	1.36001	0.646118	2.10489	0.0353009	0.667045
ENSG00000135631	2	73073382	73156721	-	RAB11FIP5	protein_coding	346.679	0.783085	0.372156	2.10418	0.0353624	0.667045
ENSG00000155729	2	200488958	200519784	-	KCTD18	protein_coding	249.006	0.391533	0.186244	2.10226	0.0355305	0.667045
ENSG00000156928	7	23298739	23311729	+	MALSU1	protein_coding	297.438	-0.350323	0.16665	-2.10215	0.0355399	0.667045
ENSG00000158517	7	74773962	74789376	+	NCF1	protein_coding	93.1136	1.2765	0.607247	2.1021	0.0355444	0.667045
ENSG00000172602	12	48857145	48865870	-	RND1	protein_coding	281.691	1.95843	0.931816	2.10173	0.0355769	0.667045
ENSG00000176909	19	48712725	48719725	-	MAMSTR	protein_coding	30.2827	0.895509	0.425308	2.10555	0.0352431	0.667045
ENSG00000188064	22	45920366	45977162	-	WNT7B	protein_coding	1051.79	0.719515	0.341912	2.10439	0.0353447	0.667045
ENSG00000204673	19	49869033	49878459	-	AKT1S1	protein_coding	262.048	0.498922	0.237381	2.10178	0.0355728	0.667045
ENSG00000140931	16	66603874	66613892	+	CMTM3	protein_coding	96.1587	0.997452	0.475004	2.09988	0.0357392	0.669227
ENSG00000095906	16	1782932	1789186	+	NUBP2	protein_coding	192.883	0.579022	0.276384	2.09499	0.0361719	0.674409
ENSG00000112530	6	162727132	163315492	+	PACRG	protein_coding	959.21	-0.426511	0.203719	-2.09363	0.0362933	0.674409
ENSG00000116663	1	11664200	11674354	+	FBXO6	protein_coding	407.014	0.437845	0.208967	2.09528	0.0361462	0.674409
ENSG00000135801	1	229593111	229626047	-	TAF5L	protein_coding	135.944	0.531264	0.253661	2.09438	0.0362257	0.674409
ENSG00000161999	16	681670	684528	-	JMJD8	protein_coding	69.6712	0.794498	0.379431	2.09392	0.0362674	0.674409
ENSG00000230084	3	42601963	42654388	-	AC006059.1	lncRNA	76.4333	0.660903	0.315633	2.0939	0.0362692	0.674409
ENSG00000047644	X	10015562	10144478	+	WWC3	protein_coding	314.785	0.609226	0.29107	2.09305	0.0363445	0.674432
ENSG00000090530	3	189956728	190122437	-	P3H2	protein_coding	64.476	1.03438	0.494307	2.09258	0.0363871	0.674432
ENSG00000129951	19	812488	821977	-	PLPPR3	protein_coding	260.678	0.639717	0.305853	2.09158	0.0364758	0.675157
ENSG00000184216	X	154010506	154019902	-	IRAK1	protein_coding	627.152	0.609648	0.291544	2.0911	0.0365188	0.675157
ENSG00000213563	8	144525733	144529132	-	C8orf82	protein_coding	81.8437	0.714199	0.341928	2.08874	0.0367308	0.678218
ENSG00000196636	7	97117698	97181763	+	SDHAF3	protein_coding	226.137	-0.464909	0.222673	-2.08786	0.0368106	0.678832
ENSG00000171488	1	89633072	89769903	+	LRRC8C	protein_coding	192.524	0.584686	0.280267	2.08617	0.036963	0.680782
ENSG00000105289	19	3708362	3750813	+	TJP3	protein_coding	1366.21	0.588194	0.282084	2.08517	0.0370536	0.681399
ENSG00000204950	11	61508749	61511018	+	LRRC10B	protein_coding	1000.79	0.550948	0.264272	2.08477	0.0370899	0.681399
ENSG00000089234	12	111642146	111685956	-	BRAP	protein_coding	283.587	0.368994	0.177153	2.08291	0.0372596	0.681898
ENSG00000111652	12	6724014	6731875	+	COPS7A	protein_coding	550.699	0.392208	0.18843	2.08146	0.0373918	0.681898
ENSG00000127507	19	14732392	14778560	-	ADGRE2	protein_coding	37.1984	1.24653	0.598878	2.08144	0.0373936	0.681898
ENSG00000153347	5	95391366	95450454	+	FAM81B	protein_coding	1898.75	-0.441968	0.212083	-2.08394	0.0371655	0.681898
ENSG00000242607	8	12570350	12571130	-	RPS3AP34	processed_pseudogene	106.617	-0.730523	0.35081	-2.08239	0.0373068	0.681898
ENSG00000269825	19	52650437	52653284	-	AC022150.4	lncRNA	107.415	0.574932	0.276224	2.0814	0.0373976	0.681898
ENSG00000102226	X	47232866	47248328	+	USP11	protein_coding	231.669	0.736976	0.354364	2.07971	0.0375517	0.683854
ENSG00000184678	1	149884459	149886652	-	H2BC21	protein_coding	367.379	0.741835	0.356821	2.07901	0.0376165	0.68418
ENSG00000167969	16	2239402	2252300	-	ECI1	protein_coding	449.957	0.455654	0.219247	2.07827	0.0376847	0.684566
ENSG00000006555	1	54779712	54801323	-	TTC22	protein_coding	337.986	0.653493	0.314553	2.07753	0.037753	0.684954
ENSG00000140416	15	63042632	63071915	+	TPM1	protein_coding	600.371	0.648165	0.312198	2.07613	0.0378817	0.685516
ENSG00000168243	1	235547685	235650754	-	GNG4	protein_coding	41.7209	1.50845	0.726733	2.07566	0.037925	0.685516
ENSG00000231738	12	85014311	85036277	-	TSPAN19	protein_coding	1106.8	-0.509336	0.245325	-2.07617	0.0378783	0.685516
ENSG00000134363	5	53480626	53487134	+	FST	protein_coding	361.892	0.892472	0.430295	2.07409	0.0380706	0.687296
ENSG00000278493	15	41908204	41908714	-	AC039056.2	lncRNA	35.6054	1.76565	0.851857	2.0727	0.0381999	0.688779
ENSG00000088833	20	1442162	1473842	-	NSFL1C	protein_coding	634.455	0.354665	0.171216	2.07145	0.0383167	0.6889
ENSG00000103269	16	675666	678268	+	RHBDL1	protein_coding	60.1144	-0.857462	0.41409	-2.07071	0.0383856	0.6889
ENSG00000104320	8	89933336	90003228	-	NBN	protein_coding	808.436	0.349052	0.168575	2.07061	0.0383955	0.6889
ENSG00000278338	13	41955808	41981565	+	VWA8-AS1	lncRNA	88.4092	-0.762761	0.368221	-2.07147	0.0383145	0.6889
ENSG00000140548	15	90001324	90082206	+	ZNF710	protein_coding	183.688	0.748001	0.361499	2.06917	0.0385303	0.690469
ENSG00000100243	22	42617840	42649392	-	CYB5R3	protein_coding	966.23	0.613369	0.296747	2.06698	0.0387364	0.693158
ENSG00000114353	3	50226292	50259362	+	GNAI2	protein_coding	1709.6	0.59241	0.286665	2.06656	0.0387754	0.693158
ENSG00000180357	15	64460742	64686068	+	ZNF609	protein_coding	898.907	0.5107	0.247326	2.06489	0.0389337	0.695135
ENSG00000100605	14	92936914	93116320	-	ITPK1	protein_coding	254.239	0.682415	0.330745	2.06326	0.0390876	0.697031
ENSG00000110841	12	27523431	27695564	+	PPFIBP1	protein_coding	973.771	0.338936	0.164394	2.06172	0.039234	0.697085
ENSG00000134830	19	47332175	47347329	+	C5AR2	protein_coding	28.5226	2.56823	1.24514	2.0626	0.0391506	0.697085
ENSG00000179632	8	144104461	144107611	+	MAF1	protein_coding	368.016	0.686755	0.333081	2.06183	0.0392243	0.697085
ENSG00000100461	14	22893204	22919182	-	RBM23	protein_coding	1123.41	-0.264049	0.128258	-2.05873	0.0395198	0.698757
ENSG00000101493	18	76357682	76495242	-	ZNF516	protein_coding	643.301	0.448709	0.217866	2.05957	0.03944	0.698757
ENSG00000123358	12	52022832	52059507	+	NR4A1	protein_coding	197.289	0.912992	0.443236	2.05983	0.0394147	0.698757
ENSG00000172818	11	65787063	65797214	+	OVOL1	protein_coding	318.564	0.800906	0.388945	2.05918	0.0394772	0.698757
ENSG00000163251	2	207762598	207769906	-	FZD5	protein_coding	169.639	0.641365	0.311697	2.05765	0.0396235	0.699689
ENSG00000168140	16	4371848	4383538	+	VASN	protein_coding	212.886	1.56757	0.761998	2.05719	0.0396684	0.699689
ENSG00000183741	22	38861422	38872249	-	CBX6	protein_coding	709.818	0.678541	0.329961	2.05643	0.0397411	0.700126
ENSG00000198919	3	108589705	108694840	+	DZIP3	protein_coding	4025.3	-0.33507	0.162986	-2.05582	0.0398001	0.700318
ENSG00000147400	X	152826994	152830757	-	CETN2	protein_coding	6325.48	-0.386194	0.187925	-2.05504	0.0398748	0.700788
ENSG00000152102	2	131047876	131093460	-	FAM168B	protein_coding	626.126	0.558202	0.271919	2.05283	0.0400894	0.703712
ENSG00000134686	1	33323623	33431052	-	PHC2	protein_coding	485.102	0.598187	0.291586	2.05149	0.0402191	0.70514
ENSG00000032742	13	20567069	20691437	+	IFT88	protein_coding	1301.04	-0.321545	0.156836	-2.0502	0.040345	0.705294
ENSG00000091137	7	107660828	107717809	+	SLC26A4	protein_coding	38.0219	1.95619	0.954269	2.04993	0.0403711	0.705294
ENSG00000104142	15	40894450	40903975	+	VPS18	protein_coding	558.272	0.715518	0.349216	2.04892	0.0404697	0.705294
ENSG00000204388	6	31827738	31830254	+	HSPA1B	protein_coding	3773.1	0.676938	0.330277	2.04961	0.0404027	0.705294
ENSG00000205336	16	57610652	57665580	+	ADGRG1	protein_coding	1712.29	0.595265	0.290467	2.04934	0.0404292	0.705294
ENSG00000140057	14	96392128	96489427	+	AK7	protein_coding	2518.45	-0.387035	0.189009	-2.04771	0.0405884	0.706519
ENSG00000005884	17	50055968	50090481	+	ITGA3	protein_coding	3758.72	0.532193	0.259976	2.04709	0.0406496	0.70674
ENSG00000167487	19	18637025	18671721	+	KLHL26	protein_coding	79.0998	0.752442	0.367685	2.04643	0.0407139	0.707016
ENSG00000136826	9	107484852	107490482	-	KLF4	protein_coding	407.664	0.834378	0.407843	2.04583	0.0407731	0.707203
ENSG00000100997	20	25294742	25390835	-	ABHD12	protein_coding	445.89	0.542531	0.265414	2.0441	0.040944	0.708482
ENSG00000163975	3	196988621	197029817	-	MELTF	protein_coding	67.0834	1.16793	0.571287	2.04438	0.040916	0.708482
ENSG00000065618	10	104031286	104085880	-	COL17A1	protein_coding	5282.61	0.687604	0.336826	2.04142	0.0412087	0.709695
ENSG00000159314	17	45393902	45434421	-	ARHGAP27	protein_coding	864.036	0.477403	0.233798	2.04195	0.0411569	0.709695
ENSG00000163082	2	222424543	222562621	+	SGPP2	protein_coding	1200.96	0.54944	0.269138	2.04148	0.0412034	0.709695
ENSG00000170836	17	60600183	60666280	+	PPM1D	protein_coding	94.1205	0.601816	0.294735	2.04189	0.0411627	0.709695
ENSG00000008513	8	133454848	133571940	-	ST3GAL1	protein_coding	593.752	0.489838	0.240406	2.03754	0.0415956	0.712991
ENSG00000100902	14	35278633	35317493	+	PSMA6	protein_coding	54.7659	0.843236	0.413838	2.0376	0.0415898	0.712991
ENSG00000105516	19	48630030	48637379	-	DBP	protein_coding	1180.2	0.401588	0.197002	2.0385	0.0415001	0.712991
ENSG00000179403	1	1434861	1442882	+	VWA1	protein_coding	261.789	0.78622	0.385595	2.03898	0.0414523	0.712991
ENSG00000008083	6	15246069	15522042	+	JARID2	protein_coding	388.363	0.367486	0.180404	2.03701	0.0416486	0.71306
ENSG00000088367	20	36091504	36232799	+	EPB41L1	protein_coding	777.145	0.539476	0.265086	2.0351	0.0418405	0.713515
ENSG00000134070	3	10164919	10243745	+	IRAK2	protein_coding	178.838	0.782312	0.384452	2.03488	0.0418633	0.713515
ENSG00000154529	9	41890314	42129510	-	CNTNAP3B	protein_coding	145.367	0.469058	0.230545	2.03456	0.0418949	0.713515
ENSG00000157330	1	12746200	12763699	+	C1orf158	protein_coding	484.002	-0.467124	0.229548	-2.03498	0.0418533	0.713515
ENSG00000229598	22	38722743	38723505	-	PRDX3P1	processed_pseudogene	32.499	1.06448	0.523334	2.03403	0.0419491	0.713515
ENSG00000267002	17	43148368	43171037	-	AC060780.1	lncRNA	446.295	-0.427467	0.210178	-2.03383	0.0419686	0.713515
ENSG00000081870	1	53916574	53945929	-	HSPB11	protein_coding	1389.3	-0.426321	0.209731	-2.0327	0.0420825	0.713788
ENSG00000157837	12	120762510	120904358	-	SPPL3	protein_coding	413.679	0.537594	0.264413	2.03316	0.0420368	0.713788
ENSG00000124422	17	20999596	21043760	-	USP22	protein_coding	685.974	0.627708	0.309265	2.02968	0.0423891	0.714737
ENSG00000125779	20	3888839	3929882	+	PANK2	protein_coding	332.207	0.419757	0.206637	2.03138	0.042217	0.714737
ENSG00000127948	7	75899200	75986855	+	POR	protein_coding	1804.19	0.564975	0.278207	2.03077	0.0422781	0.714737
ENSG00000131370	3	15254353	15341368	-	SH3BP5	protein_coding	46.8956	0.770953	0.379766	2.03007	0.0423493	0.714737
ENSG00000145911	5	178113532	178126081	+	N4BP3	protein_coding	130.152	0.884449	0.435972	2.02868	0.0424906	0.714737
ENSG00000148180	9	121207794	121332843	+	GSN	protein_coding	11487.5	0.684018	0.336955	2.02999	0.0423571	0.714737
ENSG00000166311	11	6390440	6394998	+	SMPD1	protein_coding	101.493	0.807602	0.398143	2.02842	0.0425175	0.714737
ENSG00000277443	6	113857345	113863475	+	MARCKS	protein_coding	2392.99	0.448371	0.221058	2.02829	0.0425305	0.714737
ENSG00000129474	14	22971177	22982551	-	AJUBA	protein_coding	444.634	0.409327	0.201894	2.02744	0.0426176	0.715378
ENSG00000170298	17	20449395	20467539	-	LGALS9B	protein_coding	103.094	0.934692	0.461168	2.02679	0.0426837	0.715663
ENSG00000035862	17	78852977	78925387	-	TIMP2	protein_coding	477.9	1.38678	0.685033	2.0244	0.042929	0.71895
ENSG00000072858	3	113532296	113629578	+	SIDT1	protein_coding	264.752	0.560543	0.276982	2.02375	0.0429955	0.719106
ENSG00000105323	19	41262496	41307787	+	HNRNPUL1	protein_coding	1275.83	0.419873	0.207514	2.02335	0.0430369	0.719106
ENSG00000196576	22	50274979	50307646	-	PLXNB2	protein_coding	6643.88	0.688746	0.340511	2.02268	0.0431058	0.719433
ENSG00000131188	5	177446445	177456286	+	PRR7	protein_coding	157.862	0.745319	0.368598	2.02204	0.0431725	0.719723
ENSG00000100075	22	19175581	19178739	-	SLC25A1	protein_coding	432.194	0.827462	0.410777	2.01438	0.0439695	0.724243
ENSG00000119596	14	74763316	74859435	+	YLPM1	protein_coding	524.68	0.445842	0.22135	2.01419	0.0439898	0.724243
ENSG00000123689	1	209675412	209676390	+	G0S2	protein_coding	470.297	1.33584	0.662652	2.0159	0.0438099	0.724243
ENSG00000125733	19	6737925	6751530	+	TRIP10	protein_coding	2473.4	0.510796	0.253077	2.01834	0.043556	0.724243
ENSG00000130584	20	63743666	63832038	-	ZBTB46	protein_coding	66.148	1.06708	0.529399	2.01565	0.0438369	0.724243
ENSG00000145491	5	10441524	10472029	+	ROPN1L	protein_coding	3248.38	-0.353924	0.175542	-2.01618	0.0437815	0.724243
ENSG00000149927	16	30005514	30023270	-	DOC2A	protein_coding	387.142	-0.450579	0.22357	-2.01539	0.0438642	0.724243
ENSG00000160766	1	155213821	155227422	-	GBAP1	transcribed_unprocessed_pseudogene	68.5233	-0.75938	0.376657	-2.0161	0.0437891	0.724243
ENSG00000179163	1	23845077	23868294	-	FUCA1	protein_coding	925.518	0.655693	0.325337	2.01543	0.0438601	0.724243
ENSG00000181885	17	7259903	7263983	-	CLDN7	protein_coding	3007.51	0.458054	0.2271	2.01697	0.0436983	0.724243
ENSG00000250479	22	23765834	23768443	-	CHCHD10	protein_coding	509.979	0.647896	0.321614	2.01451	0.0439556	0.724243
ENSG00000130985	X	47190861	47215128	+	UBA1	protein_coding	2663.52	0.432446	0.215301	2.00857	0.0445829	0.724379
ENSG00000140990	16	1959538	1961975	+	NDUFB10	protein_coding	1161.55	-0.336166	0.167447	-2.0076	0.0446855	0.724379
ENSG00000152689	2	33436324	33564750	+	RASGRP3	protein_coding	57.9456	0.967681	0.481543	2.00954	0.0444795	0.724379
ENSG00000160691	1	154962298	154974395	-	SHC1	protein_coding	1644.16	0.51036	0.253919	2.00993	0.0444388	0.724379
ENSG00000163956	4	3503612	3532446	-	LRPAP1	protein_coding	808.821	0.545802	0.271326	2.01161	0.044261	0.724379
ENSG00000168994	6	3722614	3752026	-	PXDC1	protein_coding	267.569	0.642029	0.319444	2.00983	0.0444491	0.724379
ENSG00000173465	11	65570460	65573942	+	ZNRD2	protein_coding	370.313	-0.394792	0.19655	-2.00861	0.0445781	0.724379
ENSG00000173473	3	47585269	47782106	-	SMARCC1	protein_coding	807.311	0.492187	0.24517	2.00753	0.0446933	0.724379
ENSG00000174307	1	201464278	201469237	-	PHLDA3	protein_coding	1526.22	0.572028	0.284462	2.01092	0.0443344	0.724379
ENSG00000185479	12	52446651	52452146	-	KRT6B	protein_coding	619.733	1.34597	0.669339	2.01089	0.0443374	0.724379
ENSG00000186007	1	205381378	205455954	-	LEMD1	protein_coding	110.303	0.964012	0.480173	2.00764	0.0446819	0.724379
ENSG00000226328	22	45133020	45163781	-	NUP50-DT	lncRNA	822.412	-0.373392	0.18559	-2.01192	0.0442286	0.724379
ENSG00000227252	2	236910797	237085838	-	AC012063.1	lncRNA	59.902	-0.675568	0.33566	-2.01265	0.0441511	0.724379
ENSG00000237172	16	67148104	67150998	-	B3GNT9	protein_coding	45.0851	1.0616	0.527828	2.01125	0.0442988	0.724379
ENSG00000173227	11	67006778	67050863	+	SYT12	protein_coding	61.4804	0.745047	0.371266	2.00677	0.0447739	0.72488
ENSG00000181449	3	181711925	181714436	+	SOX2	protein_coding	718.899	0.573664	0.286012	2.00573	0.044885	0.725873
ENSG00000177483	2	237798389	237842808	+	RBM44	protein_coding	30.3354	1.3712	0.68435	2.00366	0.0451066	0.728193
ENSG00000196611	11	102789919	102798160	-	MMP1	protein_coding	1278.62	1.07632	0.53723	2.00346	0.0451283	0.728193
ENSG00000115649	2	219171897	219178106	-	CNPPD1	protein_coding	271.521	0.558868	0.279091	2.00246	0.0452357	0.72912
ENSG00000060558	19	3136033	3163749	+	GNA15	protein_coding	550.405	0.601887	0.3011	1.99896	0.0456123	0.730348
ENSG00000100258	22	50502949	50507702	-	LMF2	protein_coding	392.116	0.435117	0.21765	1.99916	0.0455913	0.730348
ENSG00000105698	19	35268962	35279821	+	USF2	protein_coding	691.458	0.465184	0.232536	2.00048	0.0454482	0.730348
ENSG00000124587	6	42963865	42979181	-	PEX6	protein_coding	338.173	0.707008	0.35364	1.99923	0.0455836	0.730348
ENSG00000163297	4	79901146	80125454	-	ANTXR2	protein_coding	311.922	0.627366	0.313795	1.99929	0.0455771	0.730348
ENSG00000184500	3	93873051	93980003	-	PROS1	protein_coding	1663.87	-0.441168	0.220666	-1.99926	0.0455807	0.730348
ENSG00000247077	12	132710819	132722734	+	PGAM5	protein_coding	162.494	0.570433	0.28555	1.99766	0.0457533	0.731801
ENSG00000105364	19	10251901	10260055	+	MRPL4	protein_coding	126.758	0.6592	0.330227	1.9962	0.0459118	0.73193
ENSG00000132361	17	2689386	2712663	-	CLUH	protein_coding	713.557	0.551619	0.276283	1.99657	0.0458716	0.73193
ENSG00000173947	1	111346600	111353013	+	PIFO	protein_coding	7126.15	-0.354796	0.17771	-1.99649	0.0458803	0.73193
ENSG00000006695	17	14069490	14231736	+	COX10	protein_coding	168.375	0.458413	0.229775	1.99505	0.0460375	0.732924
ENSG00000138587	15	56421544	56465137	-	MNS1	protein_coding	1413.84	-0.375146	0.188071	-1.99471	0.0460747	0.732924
ENSG00000023445	11	102317450	102339403	+	BIRC3	protein_coding	701.581	0.42207	0.212434	1.98683	0.0469414	0.734064
ENSG00000084070	1	40344850	40423326	+	SMAP2	protein_coding	543.771	0.46187	0.231981	1.99098	0.0464828	0.734064
ENSG00000096968	9	4984390	5128183	+	JAK2	protein_coding	533.505	0.423105	0.212789	1.98838	0.0467696	0.734064
ENSG00000104812	19	48968130	48993310	-	GYS1	protein_coding	293.9	0.57556	0.289549	1.98778	0.0468355	0.734064
ENSG00000106299	7	123681943	123749003	-	WASL	protein_coding	1488.29	0.492428	0.247763	1.9875	0.0468673	0.734064
ENSG00000126561	17	42287547	42311943	+	STAT5A	protein_coding	121.56	0.569431	0.286009	1.99096	0.0464858	0.734064
ENSG00000148426	10	11823339	11872277	+	PROSER2	protein_coding	379.182	0.625672	0.314555	1.98907	0.0466939	0.734064
ENSG00000152078	1	95117355	95197607	+	TLCD4	protein_coding	108.269	-0.626299	0.314544	-1.99113	0.0464662	0.734064
ENSG00000153443	16	4608883	4615027	-	UBALD1	protein_coding	127.103	0.721128	0.362353	1.99012	0.0465774	0.734064
ENSG00000156172	8	95244913	95269201	-	C8orf37	protein_coding	187.408	-0.375172	0.188256	-1.99288	0.0462742	0.734064
ENSG00000156515	10	69269984	69401884	+	HK1	protein_coding	1812.3	0.562229	0.282991	1.98674	0.0469515	0.734064
ENSG00000163870	3	127571232	127598267	-	TPRA1	protein_coding	315.903	0.544327	0.273497	1.99025	0.0465639	0.734064
ENSG00000167632	8	139727725	140458579	-	TRAPPC9	protein_coding	392.371	0.690969	0.34745	1.98869	0.0467358	0.734064
ENSG00000181222	17	7484366	7514616	+	POLR2A	protein_coding	1304.46	0.69882	0.351715	1.98689	0.0469342	0.734064
ENSG00000240184	5	141475947	141512977	+	PCDHGC3	protein_coding	55.2412	1.00947	0.507151	1.99046	0.04654	0.734064
ENSG00000273142	7	66902857	66906297	+	LINC02604	lncRNA	175.602	-0.574015	0.287997	-1.99313	0.0462473	0.734064
ENSG00000137331	6	30743199	30744548	-	IER3	protein_coding	439.361	0.769844	0.387591	1.98623	0.047008	0.73416
ENSG00000137434	6	10671418	10694797	-	C6orf52	protein_coding	92.0665	-0.633394	0.319062	-1.98518	0.0471248	0.735197
ENSG00000114346	3	172750682	172821474	+	ECT2	protein_coding	765.205	-0.426993	0.215152	-1.98461	0.0471879	0.735396
ENSG00000175662	17	17843511	17972422	-	TOM1L2	protein_coding	744.765	0.555978	0.280265	1.98376	0.0472827	0.736086
ENSG00000163060	2	94871430	94876823	+	TEKT4	protein_coding	151.379	-0.600394	0.302961	-1.98175	0.0475071	0.738792
ENSG00000106397	7	101205977	101218420	-	PLOD3	protein_coding	201.599	0.809479	0.408827	1.98001	0.0477029	0.739321
ENSG00000108679	17	78971238	78979947	-	LGALS3BP	protein_coding	3825.53	0.64619	0.326301	1.98035	0.0476644	0.739321
ENSG00000136485	17	63550477	63594279	+	DCAF7	protein_coding	824.769	0.61958	0.313033	1.97928	0.0477844	0.739321
ENSG00000171004	X	132626016	132961395	-	HS6ST2	protein_coding	335.357	-0.346448	0.175045	-1.97919	0.0477946	0.739321
ENSG00000185262	17	76265348	76271298	+	UBALD2	protein_coding	1044.11	0.573942	0.289859	1.98008	0.047695	0.739321
ENSG00000259225	15	37980676	38062340	+	LINC02345	lncRNA	314.864	-0.503905	0.254833	-1.97739	0.0479973	0.74167
ENSG00000274180	17	21238870	21253410	-	NATD1	protein_coding	134.356	0.795403	0.402485	1.97623	0.0481287	0.742913
ENSG00000101849	X	9463295	9741037	+	TBL1X	protein_coding	185.941	0.574465	0.290925	1.97462	0.0483118	0.743381
ENSG00000144063	2	110083870	110116022	-	MALL	protein_coding	178.802	0.815953	0.413189	1.97477	0.0482942	0.743381
ENSG00000155629	10	96593315	96720514	-	PIK3AP1	protein_coding	162.944	0.661294	0.334838	1.97497	0.048272	0.743381
ENSG00000088038	19	54137749	54155681	+	CNOT3	protein_coding	318.647	0.421799	0.213845	1.97245	0.0485581	0.745597
ENSG00000177663	22	17084954	17115694	+	IL17RA	protein_coding	160.563	0.567791	0.287855	1.97249	0.0485538	0.745597
ENSG00000006432	14	70722526	70809534	-	MAP3K9	protein_coding	872.375	0.47446	0.241018	1.96856	0.0490032	0.747721
ENSG00000108424	17	47649476	47685505	+	KPNB1	protein_coding	2226.72	0.369696	0.187786	1.9687	0.0489871	0.747721
ENSG00000121774	1	32013868	32060850	+	KHDRBS1	protein_coding	1011.57	0.437795	0.222249	1.96984	0.0488565	0.747721
ENSG00000123989	2	219538948	219543809	-	CHPF	protein_coding	731.428	1.37141	0.696734	1.96834	0.0490285	0.747721
ENSG00000159208	1	150282543	150287093	+	CIART	protein_coding	220.88	0.506669	0.257439	1.96811	0.0490553	0.747721
ENSG00000177105	11	3826978	3840959	-	RHOG	protein_coding	255.73	0.664232	0.337152	1.97013	0.0488236	0.747721
ENSG00000196776	3	108043091	108091862	-	CD47	protein_coding	1460.59	0.350024	0.177734	1.96937	0.0489104	0.747721
ENSG00000131876	15	101281510	101295282	-	SNRPA1	protein_coding	859.36	-0.265632	0.135065	-1.96669	0.0492185	0.749426
ENSG00000132321	2	236324147	236507535	-	IQCA1	protein_coding	695.154	-0.341845	0.173938	-1.96533	0.0493762	0.751043
ENSG00000174953	3	154272546	154324487	-	DHX36	protein_coding	685.398	0.345795	0.176053	1.96416	0.0495116	0.752318
ENSG00000125703	1	62784132	62865516	+	ATG4C	protein_coding	298.99	-0.424695	0.216328	-1.9632	0.0496229	0.753224
ENSG00000198157	X	81113699	81201913	-	HMGN5	protein_coding	413.747	-0.450457	0.229535	-1.96248	0.0497066	0.753711
ENSG00000118307	12	25108289	25195162	-	CASC1	protein_coding	1895.15	-0.396602	0.202368	-1.95981	0.0500182	0.753736
ENSG00000129451	19	51012739	51020175	-	KLK10	protein_coding	455.844	0.810063	0.413203	1.96045	0.0499433	0.753736
ENSG00000174695	5	83052846	83077863	-	TMEM167A	protein_coding	2252.72	-0.252936	0.129019	-1.96045	0.0499435	0.753736
ENSG00000179299	4	40749925	40811184	+	NSUN7	protein_coding	834.801	-0.378901	0.193299	-1.96018	0.0499745	0.753736
ENSG00000185164	16	18417325	18562211	-	NOMO2	protein_coding	296.099	0.807919	0.412045	1.96076	0.0499075	0.753736
ENSG00000196549	3	155024124	155183729	+	MME	protein_coding	91.9595	1.05185	0.536307	1.96129	0.0498453	0.753736
ENSG00000104863	19	49114324	49118460	+	LIN7B	protein_coding	43.7595	-0.647717	0.330727	-1.95846	0.0501755	0.75377
ENSG00000123552	6	99432379	99521728	-	USP45	protein_coding	363.313	-0.369537	0.188654	-1.95881	0.050135	0.75377
ENSG00000177733	5	137745651	137754363	-	HNRNPA0	protein_coding	719.067	0.520966	0.26599	1.95859	0.0501604	0.75377
ENSG00000072518	11	63838928	63911019	+	MARK2	protein_coding	790.475	0.463228	0.236613	1.95775	0.0502597	0.754258
ENSG00000108528	17	4937130	4940053	-	SLC25A11	protein_coding	380.703	0.494505	0.252701	1.95688	0.050362	0.755015
ENSG00000100425	22	49773283	49827512	-	BRD1	protein_coding	352.188	0.531092	0.271522	1.95598	0.0504678	0.75505
ENSG00000131323	14	102777449	102911500	+	TRAF3	protein_coding	362.886	0.533884	0.272927	1.95614	0.0504488	0.75505
ENSG00000140829	16	72093613	72112912	+	DHX38	protein_coding	295.931	0.497967	0.254689	1.9552	0.0505597	0.75565
ENSG00000164062	3	49674014	49683971	+	APEH	protein_coding	660.168	0.499343	0.255507	1.95432	0.0506632	0.756422
ENSG00000100320	22	35738736	36028824	-	RBFOX2	protein_coding	1256.37	0.313277	0.160347	1.95375	0.0507314	0.756665
ENSG00000048342	4	15469865	15601557	+	CC2D2A	protein_coding	2949.68	-0.338104	0.173152	-1.95264	0.0508623	0.757843
ENSG00000113739	5	173314713	173329503	-	STC2	protein_coding	65.5929	1.33028	0.681501	1.95199	0.0509399	0.758224
ENSG00000247596	3	52228612	52239158	-	TWF2	protein_coding	149.6	0.621359	0.318461	1.95113	0.0510412	0.758304
ENSG00000248383	5	140926369	141012344	+	PCDHAC1	protein_coding	47.7634	1.29268	0.662553	1.95107	0.0510492	0.758304
ENSG00000162643	1	84999147	85133138	+	WDR63	protein_coding	2329.86	-0.373743	0.191642	-1.95021	0.0511507	0.759039
ENSG00000002587	4	11393150	11429564	-	HS3ST1	protein_coding	531.145	0.61377	0.315968	1.94251	0.0520756	0.759729
ENSG00000011132	19	3750772	3761692	-	APBA3	protein_coding	128.684	0.475715	0.244317	1.94712	0.0515204	0.759729
ENSG00000070047	11	576470	612222	+	PHRF1	protein_coding	379.235	0.519222	0.267414	1.94164	0.0521805	0.759729
ENSG00000099864	19	708935	748329	+	PALM	protein_coding	135.987	0.918315	0.472146	1.94498	0.0517775	0.759729
ENSG00000112514	6	33416442	33418317	-	CUTA	protein_coding	1449.76	-0.326369	0.167559	-1.94779	0.0514406	0.759729
ENSG00000112576	6	41934933	42050357	-	CCND3	protein_coding	291.797	0.763302	0.392858	1.94295	0.0520224	0.759729
ENSG00000116017	19	925781	975939	+	ARID3A	protein_coding	68.0575	0.69687	0.358917	1.94159	0.0521868	0.759729
ENSG00000136542	2	157257705	157318491	+	GALNT5	protein_coding	2537.49	0.379504	0.195288	1.94331	0.0519792	0.759729
ENSG00000137868	15	74179466	74212267	-	STRA6	protein_coding	550.113	0.889783	0.457013	1.94695	0.0515404	0.759729
ENSG00000142677	1	24119771	24143140	-	IL22RA1	protein_coding	27.8867	1.3413	0.69009	1.94366	0.0519368	0.759729
ENSG00000147535	8	38263130	38269243	-	PLPP5	protein_coding	570.024	-0.336472	0.173215	-1.94251	0.0520754	0.759729
ENSG00000155363	1	112673141	112700746	+	MOV10	protein_coding	600.403	0.524746	0.269387	1.94793	0.0514234	0.759729
ENSG00000166123	16	46884362	46931289	+	GPT2	protein_coding	444.166	0.639345	0.328204	1.94801	0.0514137	0.759729
ENSG00000167703	17	1569267	1628886	-	SLC43A2	protein_coding	214.099	0.806608	0.415288	1.94228	0.0521026	0.759729
ENSG00000174628	16	19716456	19858467	+	IQCK	protein_coding	845.506	-0.404139	0.207614	-1.94659	0.0515842	0.759729
ENSG00000197122	20	37344685	37406050	+	SRC	protein_coding	482.534	0.589573	0.303478	1.94272	0.0520497	0.759729
ENSG00000198183	20	33235995	33243311	+	BPIFA1	protein_coding	104201	-0.648905	0.33387	-1.94358	0.0519456	0.759729
ENSG00000204394	6	31777518	31795752	-	VARS1	protein_coding	456.189	0.65366	0.335644	1.94748	0.0514773	0.759729
ENSG00000214530	11	72754729	72793681	-	STARD10	protein_coding	897.933	-0.312313	0.160564	-1.9451	0.0517633	0.759729
ENSG00000138760	4	76158737	76234536	-	SCARB2	protein_coding	2337.12	0.505983	0.260807	1.94007	0.0523718	0.760903
ENSG00000148468	10	15211643	15371289	-	FAM171A1	protein_coding	33.8089	1.34074	0.690988	1.94032	0.0523404	0.760903
ENSG00000084112	12	108778191	108857590	-	SSH1	protein_coding	699.545	0.481345	0.248411	1.9377	0.0526599	0.761034
ENSG00000108829	17	50375059	50397523	-	LRRC59	protein_coding	612.938	0.657014	0.33885	1.93895	0.052507	0.761034
ENSG00000112367	6	109691312	109825428	+	FIG4	protein_coding	549.013	-0.305951	0.15789	-1.93775	0.0526542	0.761034
ENSG00000143436	1	151759647	151763496	-	MRPL9	protein_coding	207.184	-0.37857	0.195298	-1.93842	0.0525718	0.761034
ENSG00000149177	11	47980558	48170841	+	PTPRJ	protein_coding	258.178	0.730771	0.377188	1.93742	0.0526938	0.761034
ENSG00000170265	7	149195546	149226238	+	ZNF282	protein_coding	223.387	0.487334	0.25153	1.93748	0.0526867	0.761034
ENSG00000129911	19	1852399	1863579	-	KLF16	protein_coding	102.492	0.755021	0.390032	1.93579	0.0528929	0.76219
ENSG00000169499	8	38901235	38973912	+	PLEKHA2	protein_coding	416.096	0.548458	0.283291	1.93602	0.0528651	0.76219
ENSG00000183779	8	37695782	37700019	+	ZNF703	protein_coding	181.217	0.722109	0.373089	1.93549	0.0529306	0.76219
ENSG00000112763	6	26457904	26476621	+	BTN2A1	protein_coding	551.144	-0.244333	0.12627	-1.93501	0.0529896	0.762288
ENSG00000063601	X	150692971	150765108	+	MTMR1	protein_coding	447.934	0.394765	0.20422	1.93304	0.0532316	0.76366
ENSG00000090565	16	425649	523011	+	RAB11FIP3	protein_coding	251.385	0.462072	0.239244	1.93138	0.0534361	0.76366
ENSG00000105373	19	47745546	47757058	+	NOP53	protein_coding	1135.63	0.496157	0.256879	1.93148	0.0534237	0.76366
ENSG00000122642	7	32957404	33006930	+	FKBP9	protein_coding	487.23	0.635738	0.328844	1.93325	0.0532048	0.76366
ENSG00000143222	1	161152776	161158856	+	UFC1	protein_coding	3162.04	-0.413813	0.214203	-1.93187	0.0533759	0.76366
ENSG00000145715	5	87267883	87391931	+	RASA1	protein_coding	777.488	0.35106	0.181778	1.93126	0.0534515	0.76366
ENSG00000163931	3	53224712	53256052	-	TKT	protein_coding	5214.38	0.417496	0.216102	1.93193	0.0533677	0.76366
ENSG00000140479	15	101297142	101525202	-	PCSK6	protein_coding	73.7117	0.798182	0.413412	1.93072	0.0535179	0.763861
ENSG00000171428	8	18170477	18223689	+	NAT1	protein_coding	868.61	-0.315965	0.163688	-1.93029	0.0535707	0.763867
ENSG00000100342	22	36253010	36267530	+	APOL1	protein_coding	2434.23	0.606448	0.314658	1.92732	0.0539392	0.76538
ENSG00000131435	5	132257696	132273454	+	PDLIM4	protein_coding	484.075	0.551094	0.285792	1.92831	0.0538169	0.76538
ENSG00000135205	7	77122434	77329533	+	CCDC146	protein_coding	3957.13	-0.363447	0.188509	-1.92801	0.0538543	0.76538
ENSG00000186952	5	110289233	110738956	-	TMEM232	protein_coding	1429.21	-0.374541	0.194309	-1.92755	0.0539107	0.76538
ENSG00000231064	1	155195004	155205495	+	AC234582.1	lncRNA	46.0229	-0.829939	0.430374	-1.92841	0.0538036	0.76538
ENSG00000049656	5	1317752	1345099	-	CLPTM1L	protein_coding	647.548	0.522423	0.271463	1.92447	0.0542953	0.768445
ENSG00000105771	19	43727983	43754962	-	SMG9	protein_coding	296.309	0.465813	0.242214	1.92315	0.054461	0.768445
ENSG00000164070	4	127781821	127840733	+	HSPA4L	protein_coding	2395.16	-0.381094	0.198158	-1.92319	0.0544567	0.768445
ENSG00000168672	8	126552443	126558478	-	LRATD2	protein_coding	678.038	0.531487	0.276173	1.92447	0.054296	0.768445
ENSG00000169100	X	1386152	1392113	-	SLC25A6	protein_coding	2550.62	0.517668	0.269183	1.92311	0.0544666	0.768445
ENSG00000171475	17	40219304	40284136	+	WIPF2	protein_coding	567.917	0.444349	0.231062	1.92307	0.0544713	0.768445
ENSG00000140044	14	75427716	75474111	+	JDP2	protein_coding	206.389	0.515263	0.267997	1.92265	0.0545242	0.768449
ENSG00000038382	5	14143342	14532128	+	TRIO	protein_coding	850.226	0.47839	0.248917	1.92189	0.05462	0.769056
ENSG00000142327	2	240565804	240581372	+	RNPEPL1	protein_coding	347.252	0.628642	0.327326	1.92054	0.0547903	0.77071
ENSG00000059728	2	69897688	69942945	+	MXD1	protein_coding	2023.19	0.698282	0.365636	1.90977	0.0561626	0.771172
ENSG00000082781	3	124761948	124901418	-	ITGB5	protein_coding	389.654	0.882588	0.46046	1.91675	0.0552694	0.771172
ENSG00000100906	14	35401511	35404749	-	NFKBIA	protein_coding	1096.89	0.56763	0.295768	1.91917	0.0549627	0.771172
ENSG00000101210	20	63488014	63499185	-	EEF1A2	protein_coding	74.511	2.25212	1.17842	1.91113	0.0559883	0.771172
ENSG00000104687	8	30678066	30727846	-	GSR	protein_coding	2230.12	0.420735	0.219787	1.91428	0.0555841	0.771172
ENSG00000104774	19	12646511	12666742	-	MAN2B1	protein_coding	290.419	0.750162	0.391279	1.91721	0.0552119	0.771172
ENSG00000109756	4	159103013	159360174	+	RAPGEF2	protein_coding	602.475	0.298701	0.155838	1.91674	0.0552707	0.771172
ENSG00000113141	5	140647058	140662480	+	IK	protein_coding	6413.08	-0.335322	0.175589	-1.90969	0.0561726	0.771172
ENSG00000117407	1	43933320	43937240	+	ARTN	protein_coding	307.005	0.738057	0.384882	1.91762	0.0551595	0.771172
ENSG00000118508	6	146543833	146554953	+	RAB32	protein_coding	236.353	0.765872	0.399831	1.91549	0.0554299	0.771172
ENSG00000137203	6	10393186	10419659	-	TFAP2A	protein_coding	399.585	0.461694	0.241653	1.91057	0.0560602	0.771172
ENSG00000137478	11	72836745	73142318	-	FCHSD2	protein_coding	203.472	0.521138	0.272706	1.91099	0.0560059	0.771172
ENSG00000138375	2	216412414	216483053	+	SMARCAL1	protein_coding	390.78	-0.35079	0.183708	-1.9095	0.0561977	0.771172
ENSG00000143294	1	156750610	156800815	+	PRCC	protein_coding	261.055	0.551657	0.287581	1.91826	0.0550774	0.771172
ENSG00000143384	1	150574551	150579738	-	MCL1	protein_coding	6127.04	0.44496	0.232764	1.91163	0.0559233	0.771172
ENSG00000158747	1	19596979	19658456	+	NBL1	protein_coding	538.579	0.663785	0.347263	1.91148	0.0559434	0.771172
ENSG00000160948	8	144423601	144428563	-	VPS28	protein_coding	1238.36	-0.280569	0.146927	-1.90958	0.0561867	0.771172
ENSG00000168298	6	26156354	26157107	+	H1-4	protein_coding	26.6344	1.47949	0.772577	1.91501	0.0554915	0.771172
ENSG00000172336	7	100706121	100707486	+	POP7	protein_coding	118.953	0.473854	0.247594	1.91384	0.055641	0.771172
ENSG00000181004	4	122732702	122744942	+	BBS12	protein_coding	444.206	-0.446148	0.233434	-1.91124	0.0559742	0.771172
ENSG00000185522	11	554850	560738	-	LMNTD2	protein_coding	122.454	-0.614108	0.319922	-1.91956	0.054914	0.771172
ENSG00000185885	11	313506	315272	+	IFITM1	protein_coding	403.391	0.771084	0.402894	1.91386	0.0556377	0.771172
ENSG00000186212	4	76894152	76898144	-	SOWAHB	protein_coding	182.21	0.803541	0.420529	1.91079	0.056032	0.771172
ENSG00000222019	16	90039761	90047773	-	URAHP	transcribed_unprocessed_pseudogene	30.8995	-0.999577	0.52213	-1.91442	0.0555664	0.771172
ENSG00000230526	10	71878356	71879107	+	AC073370.1	lncRNA	56.5041	-1.31727	0.687132	-1.91705	0.055231	0.771172
ENSG00000280378	1	54033126	54034880	-	AL353898.3	TEC	33.896	-0.853542	0.445743	-1.91487	0.0555087	0.771172
ENSG00000086758	X	53532096	53686728	-	HUWE1	protein_coding	1846.21	0.472857	0.247821	1.90806	0.0563836	0.77227
ENSG00000147955	9	34634722	34637809	-	SIGMAR1	protein_coding	243.507	0.577794	0.302791	1.90822	0.0563623	0.77227
ENSG00000039523	16	67518418	67546788	+	RIPOR1	protein_coding	229.721	0.666838	0.349823	1.90621	0.0566225	0.774815
ENSG00000002834	17	38869859	38921770	+	LASP1	protein_coding	1656.72	0.581423	0.305236	1.90483	0.0568023	0.776083
ENSG00000102996	16	58025754	58046901	+	MMP15	protein_coding	308.751	1.20349	0.632159	1.90377	0.0569396	0.776083
ENSG00000138175	10	102673731	102714397	-	ARL3	protein_coding	1181.24	-0.377644	0.198399	-1.90346	0.0569812	0.776083
ENSG00000141873	19	2732204	2740028	-	SLC39A3	protein_coding	94.9571	0.735311	0.386275	1.90359	0.056963	0.776083
ENSG00000142910	1	31576485	31587686	+	TINAGL1	protein_coding	2147.64	1.27892	0.671746	1.90387	0.0569267	0.776083
ENSG00000008323	12	6310436	6328506	+	PLEKHG6	protein_coding	425.875	0.34515	0.182693	1.88924	0.0588595	0.776396
ENSG00000060656	1	29236516	29326813	+	PTPRU	protein_coding	1005.41	0.570109	0.300447	1.89754	0.0577573	0.776396
ENSG00000067606	1	2050411	2185395	+	PRKCZ	protein_coding	160.027	0.533846	0.282581	1.88918	0.058868	0.776396
ENSG00000074842	19	4641374	4670362	-	MYDGF	protein_coding	357.194	0.646209	0.341432	1.89264	0.0584052	0.776396
ENSG00000075856	12	108522214	108561400	-	SART3	protein_coding	317.461	0.384501	0.202373	1.89996	0.057438	0.776396
ENSG00000088826	20	4120980	4187747	+	SMOX	protein_coding	56.2322	0.899572	0.473546	1.89965	0.0574793	0.776396
ENSG00000089902	14	102592649	102730561	+	RCOR1	protein_coding	1063.37	0.365114	0.192563	1.89608	0.0579499	0.776396
ENSG00000101384	20	10637684	10673999	-	JAG1	protein_coding	1492.11	0.380399	0.20122	1.89047	0.0586957	0.776396
ENSG00000101844	X	108091668	108154671	+	ATG4A	protein_coding	767.453	-0.390639	0.206856	-1.88846	0.0589641	0.776396
ENSG00000102870	16	30778456	30787205	-	ZNF629	protein_coding	130.611	0.673363	0.356682	1.88785	0.0590458	0.776396
ENSG00000103227	16	853634	981318	-	LMF1	protein_coding	98.6294	0.467326	0.246677	1.89449	0.0581605	0.776396
ENSG00000103335	16	88715338	88785220	-	PIEZO1	protein_coding	572.726	0.670831	0.353303	1.89874	0.0575983	0.776396
ENSG00000107890	10	26991914	27100498	-	ANKRD26	protein_coding	565.441	-0.314295	0.166505	-1.8876	0.05908	0.776396
ENSG00000114670	3	131026850	131350465	+	NEK11	protein_coding	1886.2	-0.404704	0.213357	-1.89684	0.0578489	0.776396
ENSG00000115009	2	227805739	227817564	+	CCL20	protein_coding	433.488	0.780573	0.413337	1.88847	0.0589635	0.776396
ENSG00000117318	1	23557926	23559501	-	ID3	protein_coding	230.802	0.526119	0.278535	1.88888	0.0589078	0.776396
ENSG00000119574	19	58513530	58538911	-	ZBTB45	protein_coding	90.1461	0.854173	0.450353	1.89667	0.0578711	0.776396
ENSG00000124067	16	67943474	67969601	-	SLC12A4	protein_coding	403.567	0.525294	0.276171	1.90206	0.057163	0.776396
ENSG00000131462	17	42609683	42615238	+	TUBG1	protein_coding	167.175	0.700532	0.369569	1.89554	0.0580209	0.776396
ENSG00000138771	4	76435229	76783253	+	SHROOM3	protein_coding	752.343	0.648655	0.343524	1.88824	0.0589943	0.776396
ENSG00000142961	1	46607715	46616891	-	MOB3C	protein_coding	339.706	0.464963	0.246037	1.88981	0.0587836	0.776396
ENSG00000148926	11	10305073	10307397	+	ADM	protein_coding	1036.63	0.770589	0.406062	1.89771	0.0577341	0.776396
ENSG00000157240	7	91264433	91271326	+	FZD1	protein_coding	97.3711	0.730258	0.385331	1.89514	0.0580733	0.776396
ENSG00000166750	17	35243071	35273655	+	SLFN5	protein_coding	3548.97	0.387413	0.204997	1.88985	0.0587781	0.776396
ENSG00000167858	17	6789133	6831761	-	TEKT1	protein_coding	3918.9	-0.385	0.203489	-1.892	0.0584916	0.776396
ENSG00000168234	18	23992773	24135610	+	TTC39C	protein_coding	338.29	-0.38831	0.204864	-1.89545	0.0580332	0.776396
ENSG00000169247	5	148923639	149063163	-	SH3TC2	protein_coding	363.487	0.811368	0.426931	1.90047	0.0573717	0.776396
ENSG00000169908	3	149369022	149377692	-	TM4SF1	protein_coding	3473.92	0.406951	0.21508	1.89209	0.0584794	0.776396
ENSG00000171729	1	15152532	15220478	+	TMEM51	protein_coding	253.044	0.651436	0.344479	1.89108	0.058614	0.776396
ENSG00000173702	3	124905442	124953819	-	MUC13	protein_coding	527.707	-0.820481	0.434153	-1.88984	0.0587791	0.776396
ENSG00000177469	17	42402449	42423256	-	CAVIN1	protein_coding	410.762	0.864672	0.456828	1.89277	0.0583882	0.776396
ENSG00000196235	19	39436156	39476670	+	SUPT5H	protein_coding	986.131	0.502266	0.265764	1.88989	0.0587723	0.776396
ENSG00000196663	14	102362941	102502477	+	TECPR2	protein_coding	191.443	0.609868	0.322054	1.89368	0.0582675	0.776396
ENSG00000196810	4	1249300	1288291	+	CTBP1-DT	lncRNA	52.7328	0.741687	0.391791	1.89307	0.0583489	0.776396
ENSG00000197256	19	11164267	11197791	-	KANK2	protein_coding	138.258	0.819887	0.431756	1.89896	0.0575698	0.776396
ENSG00000250803	5	122129622	122183949	+	AC010255.3	protein_coding	92.9694	-0.698675	0.369733	-1.88967	0.0588015	0.776396
ENSG00000254531	4	101347780	101348883	+	AP001816.1	lncRNA	41.8475	-0.615614	0.325439	-1.89165	0.0585383	0.776396
ENSG00000256073	21	32393130	32393960	+	URB1-AS1	lncRNA	149.527	-0.545096	0.286941	-1.89968	0.0574756	0.776396
ENSG00000276547	5	141397987	141512979	+	PCDHGB5	protein_coding	28.497	1.25414	0.663654	1.88975	0.0587914	0.776396
ENSG00000087460	20	58839718	58911192	+	GNAS	protein_coding	6422.89	0.380888	0.202169	1.88401	0.0595636	0.776456
ENSG00000110492	11	46380756	46383837	+	MDK	protein_coding	1357.47	0.766028	0.406285	1.88544	0.0593702	0.776456
ENSG00000112658	6	43171269	43181506	+	SRF	protein_coding	228.282	0.602406	0.319681	1.8844	0.0595115	0.776456
ENSG00000126822	14	64704102	64750249	+	PLEKHG3	protein_coding	920.658	0.387151	0.205437	1.88452	0.0594942	0.776456
ENSG00000130522	19	18279694	18281622	-	JUND	protein_coding	1435.72	0.534181	0.283342	1.88529	0.0593912	0.776456
ENSG00000141404	18	11689264	11885685	+	GNAL	protein_coding	279.707	-0.466051	0.247253	-1.88492	0.059441	0.776456
ENSG00000166016	11	34150987	34358010	-	ABTB2	protein_coding	45.9506	1.4706	0.780265	1.88475	0.0594636	0.776456
ENSG00000198742	7	99027438	99144100	-	SMURF1	protein_coding	656.513	0.467192	0.247924	1.88441	0.0595091	0.776456
ENSG00000223960	2	178413635	178440243	+	CHROMR	lncRNA	127.014	0.63439	0.336577	1.88483	0.0594528	0.776456
ENSG00000165071	8	132685007	132760712	-	TMEM71	protein_coding	120.897	-0.80275	0.426306	-1.88304	0.0596951	0.776782
ENSG00000229124	10	17214239	17229985	-	VIM-AS1	lncRNA	127.639	-0.508539	0.270045	-1.88316	0.0596784	0.776782
ENSG00000129657	17	77088749	77217101	+	SEC14L1	protein_coding	1570.75	0.54163	0.287698	1.88264	0.0597497	0.7768
ENSG00000112308	6	24704861	24719998	-	C6orf62	protein_coding	831.662	0.30601	0.162712	1.88068	0.0600152	0.777479
ENSG00000123146	19	14380501	14408725	+	ADGRE5	protein_coding	345.896	0.703377	0.373984	1.88077	0.0600031	0.777479
ENSG00000143093	1	110031577	110074641	+	STRIP1	protein_coding	306.406	0.406183	0.215908	1.88128	0.0599343	0.777479
ENSG00000188986	9	137255327	137273542	+	NELFB	protein_coding	421.987	0.526506	0.279814	1.88163	0.0598868	0.777479
ENSG00000258689	14	70698698	70712153	+	LINC01269	lncRNA	174.483	0.71073	0.378067	1.8799	0.0601213	0.778162
ENSG00000002549	4	17577192	17607972	+	LAP3	protein_coding	4515.3	0.443779	0.239576	1.85235	0.0639751	0.778637
ENSG00000004961	X	11111301	11123086	+	HCCS	protein_coding	712.959	-0.253948	0.136115	-1.86568	0.062086	0.778637
ENSG00000013288	4	6575189	6623362	+	MAN2B2	protein_coding	293.835	0.653597	0.354429	1.84408	0.0651708	0.778637
ENSG00000019485	11	45095806	45235110	+	PRDM11	protein_coding	60.0179	1.09862	0.593592	1.8508	0.0641989	0.778637
ENSG00000019549	8	48917598	48921740	-	SNAI2	protein_coding	122.479	0.709982	0.382319	1.85704	0.0633051	0.778637
ENSG00000025708	22	50525752	50530032	-	TYMP	protein_coding	461.058	0.580004	0.314661	1.84327	0.06529	0.778637
ENSG00000066084	12	50504985	50748657	+	DIP2B	protein_coding	988.8	0.368766	0.197366	1.86844	0.0617007	0.778637
ENSG00000070413	22	19036282	19122454	-	DGCR2	protein_coding	490.805	0.713915	0.38177	1.87001	0.0614821	0.778637
ENSG00000072310	17	17810399	17837011	-	SREBF1	protein_coding	3768.24	0.398564	0.215616	1.84849	0.0645312	0.778637
ENSG00000075461	17	66964707	67033398	+	CACNG4	protein_coding	62.2656	0.877126	0.47496	1.84674	0.0647851	0.778637
ENSG00000084207	11	67583742	67586656	+	GSTP1	protein_coding	24848.5	-0.355998	0.193015	-1.84441	0.065124	0.778637
ENSG00000084463	12	14784582	14803486	-	WBP11	protein_coding	643.44	0.371619	0.201342	1.84571	0.064935	0.778637
ENSG00000085872	19	16517894	16542437	-	CHERP	protein_coding	166.149	0.657686	0.355523	1.84991	0.0643262	0.778637
ENSG00000087274	4	2843857	2930076	+	ADD1	protein_coding	1139.4	0.542684	0.290498	1.86811	0.0617463	0.778637
ENSG00000088256	19	3094362	3123999	+	GNA11	protein_coding	440.288	0.546224	0.292294	1.86875	0.0616575	0.778637
ENSG00000089050	20	18486540	18497225	-	RBBP9	protein_coding	830.31	-0.288684	0.154667	-1.86649	0.061973	0.778637
ENSG00000100284	22	35299275	35347992	+	TOM1	protein_coding	479.294	0.515097	0.275881	1.8671	0.0618879	0.778637
ENSG00000100347	22	43955442	44010531	+	SAMM50	protein_coding	784.423	-0.254383	0.135412	-1.87859	0.0603008	0.778637
ENSG00000102034	X	130064874	130110716	-	ELF4	protein_coding	285.796	0.568385	0.308237	1.84399	0.0651851	0.778637
ENSG00000108666	17	32324565	32350023	-	C17orf75	protein_coding	394.486	-0.291948	0.157553	-1.85301	0.0638809	0.778637
ENSG00000109511	4	168092537	168187736	+	ANXA10	protein_coding	861.334	-0.543759	0.293438	-1.85307	0.063873	0.778637
ENSG00000111961	6	148272304	148552048	+	SASH1	protein_coding	613.274	0.393688	0.213465	1.84427	0.0651431	0.778637
ENSG00000112655	6	43076307	43161719	+	PTK7	protein_coding	561.74	0.460395	0.249745	1.84346	0.0652622	0.778637
ENSG00000113758	5	177456608	177474401	-	DBN1	protein_coding	444.462	0.718561	0.382418	1.87899	0.0602453	0.778637
ENSG00000114473	3	197889077	197960142	-	IQCG	protein_coding	4200.93	-0.371301	0.199591	-1.86031	0.0628415	0.778637
ENSG00000114554	3	126988594	127037392	+	PLXNA1	protein_coding	1120.5	0.496501	0.26683	1.86074	0.0627813	0.778637
ENSG00000114784	3	40309707	40312424	+	EIF1B	protein_coding	618.683	-0.310008	0.167861	-1.84682	0.0647733	0.778637
ENSG00000116786	1	15684320	15734769	+	PLEKHM2	protein_coding	509.217	0.520493	0.281908	1.84632	0.0648454	0.778637
ENSG00000119139	9	69121264	69274615	+	TJP2	protein_coding	236.498	0.532761	0.284402	1.87327	0.0610316	0.778637
ENSG00000119661	14	73644875	73703732	+	DNAL1	protein_coding	1410.05	-0.271812	0.145959	-1.86225	0.0625673	0.778637
ENSG00000126461	19	49642209	49658642	+	SCAF1	protein_coding	399.725	0.698542	0.377894	1.84852	0.0645278	0.778637
ENSG00000130311	19	17309518	17323298	+	DDA1	protein_coding	382.866	0.65411	0.354312	1.84614	0.0648715	0.778637
ENSG00000134504	18	26454910	26657401	-	KCTD1	protein_coding	475.463	0.444722	0.237136	1.87539	0.0607395	0.778637
ENSG00000135069	9	78297125	78330093	+	PSAT1	protein_coding	451.109	0.653013	0.351222	1.85926	0.0629904	0.778637
ENSG00000135604	6	144150517	144191939	+	STX11	protein_coding	149.17	0.537768	0.291814	1.84284	0.0653519	0.778637
ENSG00000136270	7	45100100	45112047	-	TBRG4	protein_coding	826.511	-0.280036	0.150274	-1.8635	0.0623915	0.778637
ENSG00000137691	11	102047437	102084554	+	CFAP300	protein_coding	1965.91	-0.391672	0.212566	-1.84259	0.0653884	0.778637
ENSG00000140092	14	91869412	91947987	-	FBLN5	protein_coding	135.237	-0.715335	0.386208	-1.8522	0.0639972	0.778637
ENSG00000140280	15	51723011	51751585	-	LYSMD2	protein_coding	147.307	0.468103	0.249626	1.87522	0.060763	0.778637
ENSG00000141682	18	59899948	59904306	+	PMAIP1	protein_coding	898.784	0.445015	0.238759	1.86386	0.0623408	0.778637
ENSG00000142798	1	21822244	21937310	-	HSPG2	protein_coding	2364.91	0.741078	0.397569	1.86402	0.0623182	0.778637
ENSG00000143320	1	156699606	156705816	-	CRABP2	protein_coding	2055.78	0.724035	0.388819	1.86214	0.0625835	0.778637
ENSG00000143376	1	151612006	151699091	+	SNX27	protein_coding	565.091	0.490512	0.263002	1.86505	0.0621745	0.778637
ENSG00000144320	2	175923882	176002839	-	LNPK	protein_coding	656.044	-0.289568	0.154436	-1.875	0.0607926	0.778637
ENSG00000144645	3	31657890	32077580	-	OSBPL10	protein_coding	311.687	0.365719	0.195832	1.86751	0.0618301	0.778637
ENSG00000146072	6	47231532	47309905	-	TNFRSF21	protein_coding	2225.71	0.599495	0.32015	1.87254	0.0611314	0.778637
ENSG00000146859	7	135148072	135166215	+	TMEM140	protein_coding	101.777	0.890284	0.476876	1.86691	0.0619141	0.778637
ENSG00000148814	10	132332154	132381508	+	LRRC27	protein_coding	354.674	-0.351581	0.188349	-1.86664	0.0619515	0.778637
ENSG00000149262	11	77878720	77994671	-	INTS4	protein_coding	461.93	-0.311717	0.169174	-1.84259	0.0653891	0.778637
ENSG00000149531	20	30377372	30399257	+	FRG1BP	unprocessed_pseudogene	43.5959	0.751211	0.407616	1.84294	0.0653382	0.778637
ENSG00000150938	2	36355778	36551135	+	CRIM1	protein_coding	345.362	0.560996	0.298839	1.87725	0.0604832	0.778637
ENSG00000152104	1	214348700	214552449	-	PTPN14	protein_coding	521.062	0.40355	0.218835	1.84408	0.0651709	0.778637
ENSG00000154945	17	50693198	50707914	-	ANKRD40	protein_coding	161.928	0.50222	0.267366	1.8784	0.0603268	0.778637
ENSG00000156113	10	76869601	77638369	-	KCNMA1	protein_coding	63.4153	0.933582	0.500852	1.86399	0.0623236	0.778637
ENSG00000158195	1	27404230	27490167	-	WASF2	protein_coding	2286.84	0.465915	0.252225	1.84722	0.0647157	0.778637
ENSG00000158545	16	88570381	88631966	+	ZC3H18	protein_coding	252.408	0.600069	0.325089	1.84586	0.0649124	0.778637
ENSG00000159202	17	48908407	48929056	+	UBE2Z	protein_coding	1396.45	0.433712	0.231066	1.87701	0.0605172	0.778637
ENSG00000160633	19	5623035	5668478	+	SAFB	protein_coding	751.366	0.346962	0.187356	1.85189	0.0640422	0.778637
ENSG00000161642	12	54369133	54391298	-	ZNF385A	protein_coding	788.193	0.4595	0.246097	1.86715	0.0618805	0.778637
ENSG00000163001	2	55519604	55545879	+	CFAP36	protein_coding	2271.12	-0.375241	0.201638	-1.86097	0.062749	0.778637
ENSG00000164897	7	151081085	151083493	-	TMUB1	protein_coding	299.472	0.448266	0.242658	1.84731	0.0647017	0.778637
ENSG00000165507	10	44970981	44978809	-	DEPP1	protein_coding	287.865	1.38624	0.739436	1.87472	0.0608307	0.778637
ENSG00000165644	10	75233641	75236030	-	COMTD1	protein_coding	158.495	0.572107	0.309991	1.84556	0.0649562	0.778637
ENSG00000165801	14	21070273	21090248	+	ARHGEF40	protein_coding	145.915	0.64612	0.348215	1.85552	0.0635221	0.778637
ENSG00000165886	10	97498924	97571206	+	UBTD1	protein_coding	302.948	0.580926	0.311164	1.86694	0.0619094	0.778637
ENSG00000167123	9	128411751	128437351	+	CERCAM	protein_coding	57.0774	1.31194	0.704498	1.86224	0.0625691	0.778637
ENSG00000167700	8	144509070	144511213	+	MFSD3	protein_coding	133.37	0.535345	0.288298	1.85692	0.0633231	0.778637
ENSG00000171310	12	104455295	104762014	+	CHST11	protein_coding	94.9527	0.815287	0.436184	1.86914	0.0616039	0.778637
ENSG00000171612	1	9539465	9585173	+	SLC25A33	protein_coding	213.458	0.423715	0.228481	1.85449	0.0636694	0.778637
ENSG00000171813	10	132397168	132417859	+	PWWP2B	protein_coding	557.991	0.454931	0.244721	1.85897	0.0630309	0.778637
ENSG00000173627	1	183646275	183653316	-	APOBEC4	protein_coding	705.842	-0.460496	0.246424	-1.86871	0.0616627	0.778637
ENSG00000174898	19	5720637	5778734	+	CATSPERD	protein_coding	90.3244	-0.545794	0.292819	-1.86393	0.0623314	0.778637
ENSG00000175390	11	7970251	8001862	+	EIF3F	protein_coding	1011.14	0.476583	0.257909	1.84787	0.0646207	0.778637
ENSG00000176531	19	43474954	43504935	-	PHLDB3	protein_coding	184.842	0.704654	0.377652	1.86588	0.0620581	0.778637
ENSG00000176532	7	29563835	29567293	+	PRR15	protein_coding	744.377	0.485155	0.258672	1.87556	0.0607153	0.778637
ENSG00000176842	16	54930865	54934485	+	IRX5	protein_coding	188.554	0.59135	0.320166	1.84701	0.0647457	0.778637
ENSG00000178585	1	9848276	9910336	-	CTNNBIP1	protein_coding	309.229	0.490245	0.261549	1.87439	0.0608761	0.778637
ENSG00000179195	12	123971845	124015439	+	ZNF664	protein_coding	3393.03	-0.178194	0.0965766	-1.84511	0.0650216	0.778637
ENSG00000180233	7	30284597	30367689	+	ZNRF2	protein_coding	242.525	0.452411	0.24406	1.85369	0.0637839	0.778637
ENSG00000182179	3	49805209	49813953	-	UBA7	protein_coding	705.59	0.348673	0.187801	1.85661	0.0633664	0.778637
ENSG00000183111	5	149551947	149634968	+	ARHGEF37	protein_coding	478.259	0.47187	0.254996	1.8505	0.0642421	0.778637
ENSG00000183864	22	41433494	41446801	-	TOB2	protein_coding	415.689	0.628424	0.334864	1.87666	0.0605653	0.778637
ENSG00000185250	6	109390215	109441171	-	PPIL6	protein_coding	2300.1	-0.276229	0.149727	-1.84488	0.0650543	0.778637
ENSG00000185681	9	122159908	122200088	+	MORN5	protein_coding	1089.91	-0.41169	0.221362	-1.8598	0.0629137	0.778637
ENSG00000186318	11	117285207	117316259	-	BACE1	protein_coding	105.868	0.509496	0.275156	1.85166	0.0640744	0.778637
ENSG00000198736	16	1938210	1943326	-	MSRB1	protein_coding	778.694	-0.325237	0.176042	-1.8475	0.0646745	0.778637
ENSG00000198863	17	42980565	42993690	+	RUNDC1	protein_coding	258.064	0.467844	0.250784	1.86552	0.062108	0.778637
ENSG00000198911	22	41833079	41907307	+	SREBF2	protein_coding	2132.83	0.37504	0.20085	1.86726	0.0618653	0.778637
ENSG00000203778	6	112087591	112102790	+	FAM229B	protein_coding	1587.35	-0.441872	0.239614	-1.8441	0.0651689	0.778637
ENSG00000204351	6	31959117	31969751	+	SKIV2L	protein_coding	500.932	0.492042	0.264227	1.86219	0.0625762	0.778637
ENSG00000204439	6	31658298	31660778	-	C6orf47	protein_coding	78.6458	0.62279	0.335266	1.8576	0.0632257	0.778637
ENSG00000204711	9	69820817	69906227	+	C9orf135	protein_coding	1256.65	-0.467522	0.252989	-1.84799	0.0646033	0.778637
ENSG00000224307	9	129282458	129312665	+	AL161785.1	lncRNA	31.2378	-0.792388	0.427911	-1.85176	0.0640606	0.778637
ENSG00000236810	1	23706901	23778296	-	ELOA-AS1	lncRNA	30.1666	-0.888704	0.476543	-1.8649	0.0621956	0.778637
ENSG00000254470	11	65773898	65780976	-	AP5B1	protein_coding	240.091	0.513028	0.277596	1.84811	0.0645861	0.778637
ENSG00000254614	11	65177606	65181834	-	AP003068.2	lncRNA	24.4794	1.11311	0.595463	1.86933	0.0615775	0.778637
ENSG00000257698	12	57930115	57936345	-	GIHCG	lncRNA	354.984	-0.446292	0.239818	-1.86096	0.0627499	0.778637
ENSG00000258955	14	51304108	51331918	-	LINC00519	lncRNA	22.4766	1.03474	0.551799	1.87521	0.0607637	0.778637
ENSG00000159899	9	35792154	35809732	+	NPR2	protein_coding	131.034	-0.754648	0.409704	-1.84193	0.0654847	0.779139
ENSG00000130204	19	44890569	44903689	+	TOMM40	protein_coding	182.24	0.667855	0.362725	1.84122	0.06559	0.779205
ENSG00000173334	8	125430358	125438403	+	TRIB1	protein_coding	494.456	0.480422	0.260933	1.84117	0.065597	0.779205
ENSG00000100888	14	21385194	21456126	-	CHD8	protein_coding	726.895	0.384141	0.208715	1.8405	0.0656945	0.77933
ENSG00000167977	16	2682523	2709030	+	KCTD5	protein_coding	459.72	0.613675	0.333453	1.84037	0.0657144	0.77933
ENSG00000099917	22	20495913	20587632	+	MED15	protein_coding	875.704	0.487875	0.26538	1.8384	0.0660037	0.780652
ENSG00000108384	17	58692573	58735611	+	RAD51C	protein_coding	231.681	-0.432929	0.235619	-1.83741	0.0661495	0.780652
ENSG00000118855	3	158732198	158829719	+	MFSD1	protein_coding	3228.69	-0.260034	0.14143	-1.8386	0.0659738	0.780652
ENSG00000169926	15	31326835	31435665	+	KLF13	protein_coding	648.575	0.540232	0.293802	1.83876	0.0659504	0.780652
ENSG00000178125	8	66964099	67056604	-	PPP1R42	protein_coding	351.111	-0.383391	0.208728	-1.8368	0.0662396	0.780652
ENSG00000181220	7	149472696	149497817	-	ZNF746	protein_coding	156.153	0.497091	0.270521	1.83753	0.0661316	0.780652
ENSG00000182872	X	47145221	47186813	+	RBM10	protein_coding	369.737	0.403011	0.219421	1.8367	0.066254	0.780652
ENSG00000287737	17	82273748	82279645	+	AC132872.5	lncRNA	58.4169	-0.570772	0.310566	-1.83784	0.0660853	0.780652
ENSG00000133627	7	152759749	152855378	+	ACTR3B	protein_coding	70.0266	0.782866	0.426814	1.83421	0.0666228	0.782845
ENSG00000165555	14	77394021	77423517	-	NOXRED1	protein_coding	134.597	-0.466924	0.254493	-1.83472	0.066547	0.782845
ENSG00000187118	3	28241584	28325142	+	CMC1	protein_coding	318.18	-0.399743	0.217963	-1.83399	0.0666548	0.782845
ENSG00000197006	16	21597218	21657473	+	METTL9	protein_coding	1674.79	0.45382	0.247399	1.83436	0.0666	0.782845
ENSG00000103496	16	31032889	31042975	+	STX4	protein_coding	299.474	0.376565	0.205376	1.83354	0.0667226	0.783011
ENSG00000085377	6	105273220	105454062	-	PREP	protein_coding	395.726	0.55334	0.302752	1.8277	0.067595	0.784912
ENSG00000099956	22	23786931	23838008	+	SMARCB1	protein_coding	608.77	0.362944	0.198484	1.82858	0.0674627	0.784912
ENSG00000101544	18	80109262	80147523	+	ADNP2	protein_coding	257.618	0.418236	0.22872	1.82859	0.0674605	0.784912
ENSG00000109133	4	41935129	41960803	+	TMEM33	protein_coding	1581.79	-0.230779	0.126245	-1.82802	0.0675465	0.784912
ENSG00000123159	19	14477760	14496149	-	GIPC1	protein_coding	2944.85	0.546196	0.298825	1.82781	0.0675777	0.784912
ENSG00000132470	17	75721328	75757818	+	ITGB4	protein_coding	3251.41	0.559463	0.305882	1.82901	0.0673978	0.784912
ENSG00000137275	6	3063991	3115187	+	RIPK1	protein_coding	305.193	0.483669	0.264675	1.82741	0.0676379	0.784912
ENSG00000162889	1	206684944	206734283	+	MAPKAPK2	protein_coding	639.127	0.487739	0.266756	1.82841	0.0674886	0.784912
ENSG00000165929	14	91779746	91867536	-	TC2N	protein_coding	3991.11	-0.270212	0.147719	-1.82924	0.0673641	0.784912
ENSG00000167657	19	3958453	3971123	-	DAPK3	protein_coding	357.309	0.607359	0.332276	1.82788	0.0675682	0.784912
ENSG00000167693	17	799310	979776	-	NXN	protein_coding	629.553	0.703665	0.384815	1.82858	0.0674625	0.784912
ENSG00000182093	21	39377698	39428528	+	GET1	protein_coding	827.502	-0.340331	0.185875	-1.83097	0.0671057	0.784912
ENSG00000188343	8	93698561	93731527	+	FAM92A	protein_coding	429.949	-0.349713	0.191343	-1.82768	0.0675974	0.784912
ENSG00000230062	6	46746917	46759506	+	ANKRD66	protein_coding	1079.4	-0.36212	0.198049	-1.82844	0.0674838	0.784912
ENSG00000083857	4	186587794	186726722	-	FAT1	protein_coding	2744.9	0.373576	0.20459	1.82597	0.0678545	0.7868
ENSG00000074964	1	17539698	17697874	+	ARHGEF10L	protein_coding	949.084	0.555934	0.304745	1.82426	0.0681128	0.788222
ENSG00000089053	12	121308245	121399896	-	ANAPC5	protein_coding	2827.75	-0.294644	0.161657	-1.82265	0.0683564	0.788222
ENSG00000112773	6	81491439	81752774	-	TENT5A	protein_coding	491.124	0.45746	0.251186	1.8212	0.0685762	0.788222
ENSG00000114388	3	50347330	50350826	-	NPRL2	protein_coding	302.497	-0.43164	0.236665	-1.82384	0.0681762	0.788222
ENSG00000119977	10	95663396	95694143	-	TCTN3	protein_coding	917.314	-0.294838	0.161902	-1.82109	0.0685933	0.788222
ENSG00000120708	5	136028988	136063818	+	TGFBI	protein_coding	1693.39	0.566341	0.310609	1.82332	0.0682543	0.788222
ENSG00000127481	1	19074510	19210266	-	UBR4	protein_coding	2160.6	0.479555	0.263015	1.8233	0.0682575	0.788222
ENSG00000136897	9	101387633	101398618	-	MRPL50	protein_coding	639.112	-0.389327	0.213804	-1.82096	0.0686134	0.788222
ENSG00000148248	9	133361450	133376166	-	SURF4	protein_coding	909.243	0.607404	0.33304	1.82382	0.0681796	0.788222
ENSG00000151718	4	183099257	183320777	+	WWC2	protein_coding	301.785	0.383548	0.210585	1.82135	0.0685541	0.788222
ENSG00000169242	1	155127876	155134899	+	EFNA1	protein_coding	1103.14	-0.353289	0.194022	-1.82088	0.0686257	0.788222
ENSG00000197714	19	57280051	57294069	+	ZNF460	protein_coding	245.042	0.433715	0.23792	1.82295	0.0683116	0.788222
ENSG00000135547	6	125747664	125761269	+	HEY2	protein_coding	39.3986	-0.789278	0.433728	-1.81976	0.0687963	0.78956
ENSG00000066044	19	7958573	8005659	-	ELAVL1	protein_coding	518.553	0.520113	0.285883	1.81932	0.068863	0.789704
ENSG00000073350	17	75525080	75575208	+	LLGL2	protein_coding	1279.61	0.455832	0.25065	1.8186	0.0689721	0.789847
ENSG00000159423	1	18871430	18902724	-	ALDH4A1	protein_coding	207.282	0.513852	0.282565	1.81853	0.0689837	0.789847
ENSG00000110427	11	33376083	33674102	+	KIAA1549L	protein_coding	53.2806	1.12361	0.618234	1.81745	0.0691482	0.79111
ENSG00000184985	4	7192538	7742836	+	SORCS2	protein_coding	111.031	0.838262	0.461322	1.81708	0.0692042	0.791129
ENSG00000272391	7	75416786	75486299	-	POM121C	protein_coding	300.192	0.40943	0.225488	1.81575	0.069409	0.79285
ENSG00000099795	19	14566078	14572066	-	NDUFB7	protein_coding	1226.84	-0.365194	0.201178	-1.81528	0.0694815	0.793057
ENSG00000010165	1	171781660	171814023	+	EEF1AKNMT	protein_coding	265.771	0.448906	0.247842	1.81126	0.0701006	0.794426
ENSG00000071539	5	892884	919357	+	TRIP13	protein_coding	292.095	-0.503527	0.278565	-1.80757	0.0706732	0.794426
ENSG00000086102	9	33290512	33371157	+	NFX1	protein_coding	1231.33	-0.339804	0.188061	-1.80688	0.070781	0.794426
ENSG00000088986	12	120469850	120498493	+	DYNLL1	protein_coding	7447.59	-0.327676	0.180745	-1.81291	0.0698451	0.794426
ENSG00000103494	16	53598153	53703938	-	RPGRIP1L	protein_coding	1525.53	-0.289949	0.160366	-1.80805	0.0705991	0.794426
ENSG00000107816	10	100996618	101007836	+	LZTS2	protein_coding	633.395	0.442356	0.244743	1.80743	0.070695	0.794426
ENSG00000124225	20	57648392	57711536	-	PMEPA1	protein_coding	273.004	1.3424	0.741882	1.80945	0.0703812	0.794426
ENSG00000125657	19	6531026	6535924	+	TNFSF9	protein_coding	702.086	0.702821	0.388114	1.81086	0.0701618	0.794426
ENSG00000130958	9	96313444	96383711	-	SLC35D2	protein_coding	50.9968	0.673126	0.37215	1.80875	0.0704898	0.794426
ENSG00000132376	17	1494577	1516742	-	INPP5K	protein_coding	137.744	0.550025	0.303312	1.8134	0.0697705	0.794426
ENSG00000132746	11	67662160	67681224	-	ALDH3B2	protein_coding	502.795	0.597892	0.330919	1.80676	0.0707996	0.794426
ENSG00000137449	4	15002674	15070153	+	CPEB2	protein_coding	350.679	0.421572	0.232794	1.81093	0.0701524	0.794426
ENSG00000140564	15	90868588	90883458	+	FURIN	protein_coding	405.864	0.637982	0.353032	1.80715	0.0707387	0.794426
ENSG00000142444	19	10928811	10933535	+	TIMM29	protein_coding	106.953	0.67188	0.371043	1.81079	0.070174	0.794426
ENSG00000149480	11	62593214	62601865	-	MTA2	protein_coding	552.026	0.421952	0.233379	1.80801	0.0706046	0.794426
ENSG00000152240	18	46104378	46128333	+	HAUS1	protein_coding	245.855	-0.493053	0.272466	-1.8096	0.0703582	0.794426
ENSG00000163257	4	17800655	17810758	-	DCAF16	protein_coding	442.2	-0.325527	0.179448	-1.81405	0.0696704	0.794426
ENSG00000169258	5	176595802	176610156	-	GPRIN1	protein_coding	27.7025	1.00746	0.557433	1.80732	0.0707122	0.794426
ENSG00000173120	11	67119263	67258082	+	KDM2A	protein_coding	1160.7	0.387652	0.214402	1.80806	0.0705967	0.794426
ENSG00000174705	5	172325000	172454525	-	SH3PXD2B	protein_coding	502.321	0.675489	0.373351	1.80926	0.0704107	0.794426
ENSG00000178913	5	141260225	141320784	-	TAF7	protein_coding	1351.96	0.272902	0.150586	1.81228	0.0699436	0.794426
ENSG00000270504	6	3751111	3753871	+	AL391422.4	lncRNA	30.6413	0.879225	0.485996	1.80912	0.0704323	0.794426
ENSG00000100292	22	35380361	35394207	+	HMOX1	protein_coding	469.48	0.577784	0.320434	1.80313	0.0713678	0.79587
ENSG00000102038	X	129446501	129523500	-	SMARCA1	protein_coding	822.031	-0.307375	0.170388	-1.80397	0.0712364	0.79587
ENSG00000108840	17	44076746	44123702	-	HDAC5	protein_coding	833.184	0.313156	0.17366	1.80327	0.0713465	0.79587
ENSG00000114626	3	127672935	127680926	+	ABTB1	protein_coding	119.706	0.434482	0.240746	1.80473	0.0711164	0.79587
ENSG00000134575	11	47239302	47248906	-	ACP2	polymorphic_pseudogene	193.069	0.704984	0.390725	1.8043	0.071185	0.79587
ENSG00000160345	9	135495181	135501734	-	C9orf116	protein_coding	1836.95	-0.410128	0.227495	-1.8028	0.0714194	0.79587
ENSG00000165416	13	52652709	52700909	+	SUGT1	protein_coding	1128.95	-0.271928	0.15073	-1.80408	0.0712188	0.79587
ENSG00000169957	16	30524004	30526821	-	ZNF768	protein_coding	205.401	0.562398	0.311944	1.80288	0.0714071	0.79587
ENSG00000271447	17	35756249	35795707	-	MMP28	protein_coding	244.122	0.713716	0.395365	1.80521	0.0710422	0.79587
ENSG00000150787	11	112226367	112269955	+	PTS	protein_coding	510.892	-0.352114	0.195376	-1.80223	0.0715087	0.796258
ENSG00000117616	1	25242249	25338213	-	RSRP1	protein_coding	2425.96	-0.315108	0.174904	-1.80161	0.0716072	0.796747
ENSG00000125999	20	33273480	33309871	+	BPIFB1	protein_coding	48693.3	-0.479576	0.266275	-1.80105	0.0716944	0.797109
ENSG00000163818	3	45823316	45916042	-	LZTFL1	protein_coding	2368.23	-0.352544	0.195815	-1.80039	0.0717983	0.797656
ENSG00000079385	19	42507304	42561234	-	CEACAM1	protein_coding	2850.77	0.478374	0.265808	1.7997	0.0719082	0.797787
ENSG00000162783	1	181088700	181092900	+	IER5	protein_coding	1694.63	0.527845	0.293308	1.79963	0.0719195	0.797787
ENSG00000171757	3	169793003	169812986	-	LRRC34	protein_coding	520.949	-0.359429	0.199805	-1.7989	0.0720343	0.798453
ENSG00000007080	19	17933015	17943991	+	CCDC124	protein_coding	319.913	0.640432	0.356284	1.79753	0.0722509	0.799032
ENSG00000137161	6	42929192	42939294	+	CNPY3	protein_coding	353.231	-0.367049	0.204154	-1.7979	0.0721925	0.799032
ENSG00000158526	X	54440404	54448032	+	TSR2	protein_coding	115.311	0.721559	0.401411	1.79756	0.072247	0.799032
ENSG00000002586	X	2691187	2741309	+	CD99	protein_coding	515.543	0.449956	0.25144	1.78951	0.073532	0.799205
ENSG00000020426	14	60734742	60969965	+	MNAT1	protein_coding	616.427	-0.398038	0.222731	-1.78707	0.0739255	0.799205
ENSG00000054611	22	46762617	47175699	+	TBC1D22A	protein_coding	301.879	0.457399	0.256376	1.78409	0.0744087	0.799205
ENSG00000071553	X	154428645	154436516	+	ATP6AP1	protein_coding	1466.94	0.503635	0.28163	1.78829	0.0737298	0.799205
ENSG00000083444	1	11934205	11975538	+	PLOD1	protein_coding	242.654	0.745821	0.418109	1.7838	0.0744568	0.799205
ENSG00000100003	22	30396941	30425303	+	SEC14L2	protein_coding	181.865	0.788128	0.438895	1.79571	0.0725408	0.799205
ENSG00000104689	8	23190452	23225102	-	TNFRSF10A	protein_coding	191.159	0.447983	0.250774	1.7864	0.0740341	0.799205
ENSG00000105810	7	92604921	92836594	-	CDK6	protein_coding	1224.02	0.318249	0.178412	1.78379	0.074458	0.799205
ENSG00000106399	7	7636518	7718607	-	RPA3	protein_coding	626.191	-0.348556	0.194252	-1.79435	0.0727579	0.799205
ENSG00000108106	19	55399745	55407788	-	UBE2S	protein_coding	173.799	0.595942	0.333645	1.78616	0.0740741	0.799205
ENSG00000109736	4	2930561	2934834	-	MFSD10	protein_coding	747.468	0.650762	0.364552	1.7851	0.0742451	0.799205
ENSG00000113811	3	53884417	53891962	-	SELENOK	protein_coding	715.915	-0.340016	0.190024	-1.78933	0.0735611	0.799205
ENSG00000115008	2	112773925	112784493	-	IL1A	protein_coding	609.604	1.04629	0.583995	1.79162	0.0731945	0.799205
ENSG00000120733	5	138352685	138437028	+	KDM3B	protein_coding	941.846	0.3643	0.203672	1.78866	0.0736691	0.799205
ENSG00000120896	8	22544986	22575788	+	SORBS3	protein_coding	153.203	0.618232	0.346365	1.78491	0.0742755	0.799205
ENSG00000124299	19	33386950	33521791	-	PEPD	protein_coding	271.502	0.530133	0.29559	1.79348	0.0728968	0.799205
ENSG00000127527	19	16355239	16472085	-	EPS15L1	protein_coding	481.006	0.363528	0.202567	1.7946	0.0727168	0.799205
ENSG00000128567	7	131500262	131558217	-	PODXL	protein_coding	405.584	0.688739	0.385559	1.78634	0.0740442	0.799205
ENSG00000130787	12	122834453	122862961	+	HIP1R	protein_coding	462.438	0.417543	0.233117	1.79113	0.0732728	0.799205
ENSG00000140836	16	72782885	73891871	-	ZFHX3	protein_coding	296.935	0.34565	0.193762	1.78389	0.0744416	0.799205
ENSG00000142208	14	104769349	104795751	-	AKT1	protein_coding	549.541	0.443385	0.248552	1.78387	0.0744444	0.799205
ENSG00000143416	1	151364304	151372707	-	SELENBP1	protein_coding	1556.11	-0.310092	0.172733	-1.79521	0.0726199	0.799205
ENSG00000143845	1	204131062	204152044	-	ETNK2	protein_coding	106.148	0.66862	0.372575	1.79459	0.0727192	0.799205
ENSG00000146112	6	30676389	30687895	-	PPP1R18	protein_coding	401.011	0.568973	0.317995	1.78925	0.0735744	0.799205
ENSG00000152894	6	127968779	128520674	-	PTPRK	protein_coding	1511.84	0.427404	0.23835	1.79318	0.0729446	0.799205
ENSG00000158109	1	3625015	3630127	+	TPRG1L	protein_coding	573.904	0.536099	0.298994	1.79301	0.0729712	0.799205
ENSG00000160293	9	133761894	133992604	-	VAV2	protein_coding	223.213	0.639739	0.358469	1.78464	0.0743192	0.799205
ENSG00000160326	9	133471094	133479127	-	SLC2A6	protein_coding	27.0566	1.44716	0.80748	1.79219	0.0731025	0.799205
ENSG00000164972	9	34379019	34397810	-	C9orf24	protein_coding	2545.95	-0.323752	0.181447	-1.78428	0.0743778	0.799205
ENSG00000167257	11	117232625	117286454	+	RNF214	protein_coding	155.983	0.418289	0.233811	1.78901	0.0736138	0.799205
ENSG00000168005	11	63813456	63827716	+	SPINDOC	protein_coding	136.121	0.460128	0.257383	1.78772	0.0738214	0.799205
ENSG00000170423	12	52837804	52849092	-	KRT78	protein_coding	75.2626	1.3659	0.763356	1.78934	0.0735606	0.799205
ENSG00000171928	17	18781111	18806714	+	TVP23B	protein_coding	2543.54	-0.314629	0.175848	-1.78921	0.0735812	0.799205
ENSG00000173011	4	7041899	7057952	+	TADA2B	protein_coding	187.546	0.676661	0.377922	1.79048	0.0733766	0.799205
ENSG00000174851	11	66284580	66289145	-	YIF1A	protein_coding	388.252	0.480358	0.269209	1.78433	0.0743698	0.799205
ENSG00000175221	19	867630	893218	-	MED16	protein_coding	322.075	0.507295	0.284216	1.78489	0.0742793	0.799205
ENSG00000179715	12	47079603	47236662	+	PCED1B	protein_coding	27.8883	1.17884	0.657826	1.79202	0.0731295	0.799205
ENSG00000214293	7	77657659	77696267	-	APTR	lncRNA	162.256	-0.463867	0.259554	-1.78717	0.0739096	0.799205
ENSG00000234745	6	31269491	31357188	-	HLA-B	protein_coding	7474.28	0.279628	0.155851	1.7942	0.0727806	0.799205
ENSG00000260220	9	136249971	136306901	-	CCDC187	protein_coding	1076.13	-0.417002	0.233037	-1.78942	0.0735469	0.799205
ENSG00000180198	1	28505943	28539300	+	RCC1	protein_coding	482.675	0.357048	0.200243	1.78307	0.0745749	0.79987
ENSG00000096872	9	26947039	27062930	+	IFT74	protein_coding	1320.34	-0.303234	0.170142	-1.78224	0.0747107	0.800739
ENSG00000100307	22	39120167	39152680	-	CBX7	protein_coding	100.382	0.520467	0.293143	1.77547	0.0758202	0.801741
ENSG00000102890	16	67199111	67204029	+	ELMO3	protein_coding	324.517	0.369558	0.208118	1.77572	0.0757799	0.801741
ENSG00000108344	17	39980807	39997959	+	PSMD3	protein_coding	561.813	0.460374	0.259135	1.77658	0.0756377	0.801741
ENSG00000108349	17	40140318	40172171	+	CASC3	protein_coding	603.736	0.350833	0.197481	1.77655	0.075643	0.801741
ENSG00000122033	13	27435643	27450591	-	MTIF3	protein_coding	714.923	-0.28048	0.157802	-1.77742	0.0754999	0.801741
ENSG00000138867	22	24540423	24555935	-	GUCD1	protein_coding	493.597	0.502385	0.282627	1.77755	0.075477	0.801741
ENSG00000141526	17	82228397	82261129	+	SLC16A3	protein_coding	2518.46	0.579605	0.326005	1.7779	0.0754203	0.801741
ENSG00000151338	14	37197913	37552361	+	MIPOL1	protein_coding	456.222	-0.296011	0.166386	-1.77906	0.0752296	0.801741
ENSG00000162413	1	6590724	6614607	-	KLHL21	protein_coding	967.24	0.438375	0.246189	1.78064	0.0749708	0.801741
ENSG00000162430	1	25800176	25818221	+	SELENON	protein_coding	311.893	0.648491	0.364145	1.78086	0.0749357	0.801741
ENSG00000163430	3	120392293	120450993	-	FSTL1	protein_coding	715.111	0.329686	0.185575	1.77656	0.0756407	0.801741
ENSG00000167778	12	53064316	53079404	-	SPRYD3	protein_coding	560.827	0.398328	0.223814	1.77973	0.0751208	0.801741
ENSG00000168610	17	42313324	42388568	-	STAT3	protein_coding	1617.44	0.470449	0.264768	1.77683	0.0755957	0.801741
ENSG00000176601	2	134964485	135047468	-	MAP3K19	protein_coding	2667.66	-0.297573	0.16743	-1.77729	0.0755198	0.801741
ENSG00000188042	2	234493041	234497081	-	ARL4C	protein_coding	483.054	0.6922	0.389906	1.7753	0.0758485	0.801741
ENSG00000196466	19	12390016	12401271	-	ZNF799	protein_coding	109.905	-0.49984	0.280627	-1.78115	0.0748877	0.801741
ENSG00000213123	3	196291219	196318299	-	TCTEX1D2	protein_coding	53.5162	-0.87919	0.494994	-1.77616	0.075706	0.801741
ENSG00000214456	19	4522531	4535224	-	PLIN5	protein_coding	71.6632	-0.73849	0.415234	-1.77849	0.075323	0.801741
ENSG00000243679	7	128653969	128654722	+	AC018638.5	processed_pseudogene	140.389	0.491171	0.276216	1.77821	0.0753687	0.801741
ENSG00000105656	19	18442663	18522116	-	ELL	protein_coding	147.239	0.538855	0.303631	1.7747	0.0759472	0.801906
ENSG00000196526	4	7758714	7939926	-	AFAP1	protein_coding	89.4506	0.713072	0.401835	1.77454	0.0759741	0.801906
ENSG00000136514	3	187368385	187372076	+	RTP4	protein_coding	527.289	0.677956	0.382163	1.774	0.076064	0.802274
ENSG00000105732	19	42068477	42081552	+	ZNF574	protein_coding	81.4226	0.696983	0.393097	1.77305	0.0762197	0.803336
ENSG00000130560	9	135932969	135961373	-	UBAC1	protein_coding	1279.22	-0.274797	0.155056	-1.77224	0.0763548	0.804179
ENSG00000144746	3	69084937	69106092	+	ARL6IP5	protein_coding	3237.98	-0.216347	0.122112	-1.77171	0.0764422	0.804518
ENSG00000078018	2	209424058	209734118	+	MAP2	protein_coding	146.742	0.592216	0.334404	1.77096	0.076567	0.805251
ENSG00000167470	19	1248553	1259140	+	MIDN	protein_coding	1261.71	0.505543	0.28558	1.77023	0.0766884	0.805366
ENSG00000182326	12	6988259	7071032	+	C1S	protein_coding	121.267	-1.08171	0.61095	-1.77053	0.0766386	0.805366
ENSG00000100354	22	40044817	40335808	+	TNRC6B	protein_coding	702.672	0.317137	0.179184	1.7699	0.0767441	0.805372
ENSG00000188706	X	129803288	129843909	-	ZDHHC9	protein_coding	465.757	0.512001	0.289349	1.7695	0.0768111	0.805495
ENSG00000087152	17	44191805	44200113	-	ATXN7L3	protein_coding	371.722	0.49883	0.281989	1.76897	0.0768991	0.805534
ENSG00000243943	2	27582969	27623217	+	ZNF512	protein_coding	306.221	-0.447331	0.252899	-1.76881	0.0769253	0.805534
ENSG00000121691	11	34438934	34472060	+	CAT	protein_coding	2966.12	-0.306718	0.173521	-1.76762	0.0771253	0.805893
ENSG00000146535	7	2728105	2844308	-	GNA12	protein_coding	182.216	0.672873	0.380611	1.76788	0.0770813	0.805893
ENSG00000204304	6	32184733	32190202	-	PBX2	protein_coding	667.605	0.22394	0.126654	1.76812	0.0770406	0.805893
ENSG00000051128	19	18929201	18941261	-	HOMER3	protein_coding	127.595	0.571402	0.323614	1.76569	0.0774475	0.808102
ENSG00000254166	8	127072694	127227541	-	CASC19	lncRNA	218.517	0.599107	0.339295	1.76574	0.0774393	0.808102
ENSG00000246705	12	14774383	14778002	+	H2AJ	protein_coding	1590.6	-0.327526	0.18553	-1.76535	0.0775046	0.808119
ENSG00000049618	6	156776020	157210779	+	ARID1B	protein_coding	758.991	0.344262	0.195302	1.76271	0.077949	0.808448
ENSG00000074416	3	127689062	128052190	-	MGLL	protein_coding	373.905	0.621753	0.352646	1.76311	0.0778827	0.808448
ENSG00000099804	19	531760	542092	+	CDC34	protein_coding	356.926	0.502479	0.28579	1.75821	0.0787115	0.808448
ENSG00000104881	19	45379638	45406349	-	PPP1R13L	protein_coding	805.94	0.496954	0.282903	1.75662	0.0789824	0.808448
ENSG00000105063	19	55229779	55259017	-	PPP6R1	protein_coding	850.517	0.525916	0.298755	1.76036	0.0783473	0.808448
ENSG00000107862	10	102245532	102382899	+	GBF1	protein_coding	1058.13	0.495629	0.281372	1.76147	0.0781588	0.808448
ENSG00000108639	17	78168558	78173527	+	SYNGR2	protein_coding	1223.97	0.616299	0.349648	1.76263	0.0779634	0.808448
ENSG00000112297	6	106360717	106570460	+	CRYBG1	protein_coding	1195.03	0.333057	0.18956	1.757	0.0789175	0.808448
ENSG00000116954	1	38838198	38859772	-	RRAGC	protein_coding	181.268	0.467421	0.266042	1.75694	0.0789276	0.808448
ENSG00000121900	1	32894594	32901438	-	TMEM54	protein_coding	290.724	0.612548	0.347733	1.76155	0.0781458	0.808448
ENSG00000122735	9	34457414	34520988	+	DNAI1	protein_coding	2911.72	-0.292666	0.166605	-1.75665	0.0789771	0.808448
ENSG00000124164	20	58389229	58451101	+	VAPB	protein_coding	437.898	0.384812	0.218935	1.75765	0.0788064	0.808448
ENSG00000128274	22	42692121	42721298	-	A4GALT	protein_coding	1750.85	0.392936	0.223726	1.75633	0.0790325	0.808448
ENSG00000128573	7	114086327	114693772	+	FOXP2	protein_coding	313.29	-0.533452	0.302901	-1.76115	0.0782138	0.808448
ENSG00000146243	6	78867551	78946440	+	IRAK1BP1	protein_coding	355.755	-0.375967	0.213691	-1.7594	0.0785103	0.808448
ENSG00000147044	X	41514934	41923645	-	CASK	protein_coding	524.235	0.344556	0.195599	1.76155	0.0781461	0.808448
ENSG00000155508	5	154857553	154876793	+	CNOT8	protein_coding	1452.34	-0.301148	0.170746	-1.76372	0.0777794	0.808448
ENSG00000164976	9	34366666	34376898	-	MYORG	protein_coding	410.232	0.649731	0.369689	1.75751	0.0788313	0.808448
ENSG00000165188	9	113297093	113303376	-	RNF183	protein_coding	79.0125	-0.487788	0.276972	-1.76115	0.0782134	0.808448
ENSG00000165215	7	73768997	73770270	-	CLDN3	protein_coding	403.162	0.642922	0.365581	1.75863	0.0786402	0.808448
ENSG00000166959	11	60699585	60715807	+	MS4A8	protein_coding	2687.33	-0.385577	0.218861	-1.76174	0.0781125	0.808448
ENSG00000167522	16	89267630	89490561	-	ANKRD11	protein_coding	1108.1	0.412276	0.234265	1.75987	0.0784302	0.808448
ENSG00000178741	15	74919791	74938083	-	COX5A	protein_coding	1016.48	0.407812	0.231835	1.75906	0.0785676	0.808448
ENSG00000185650	14	68787660	68796253	-	ZFP36L1	protein_coding	10797.8	0.418359	0.238031	1.75758	0.0788191	0.808448
ENSG00000186395	17	40818117	40822614	-	KRT10	protein_coding	260.568	0.636709	0.361777	1.75995	0.078416	0.808448
ENSG00000196696	16	69976297	70065948	-	AC009022.1	lncRNA	108.113	-0.564014	0.321013	-1.75698	0.078921	0.808448
ENSG00000253276	7	106654360	106661158	-	CCDC71L	protein_coding	122.841	0.790496	0.449048	1.76038	0.0783428	0.808448
ENSG00000070614	5	150485818	150558211	+	NDST1	protein_coding	558.898	0.642906	0.366138	1.75591	0.0791034	0.808607
ENSG00000178053	3	158571163	158607252	+	MLF1	protein_coding	2539.29	-0.364455	0.207599	-1.75557	0.0791614	0.808632
ENSG00000085185	X	129981107	130058083	+	BCORL1	protein_coding	102.994	0.620027	0.353478	1.75407	0.079418	0.809268
ENSG00000136861	9	120388869	120580170	-	CDK5RAP2	protein_coding	1225.21	-0.266928	0.152187	-1.75395	0.0794386	0.809268
ENSG00000169057	X	154021573	154137103	-	MECP2	protein_coding	518.33	0.439456	0.250566	1.75385	0.0794558	0.809268
ENSG00000178665	7	55887456	55942530	+	ZNF713	protein_coding	64.7921	-0.49323	0.281073	-1.75481	0.0792915	0.809268
ENSG00000188522	17	18968789	19004764	-	FAM83G	protein_coding	292.489	0.551734	0.314631	1.75359	0.079501	0.809268
ENSG00000149256	11	78652829	79441030	-	TENM4	protein_coding	263.439	0.387974	0.221347	1.75279	0.0796389	0.809542
ENSG00000182853	17	4785285	4786433	-	VMO1	protein_coding	409.084	-0.656214	0.374371	-1.75284	0.079629	0.809542
ENSG00000100100	22	31281594	31292534	-	PIK3IP1	protein_coding	1440.36	0.334638	0.191125	1.75089	0.0799657	0.81041
ENSG00000124596	6	41033627	41097787	-	OARD1	protein_coding	498.906	-0.349912	0.199827	-1.75108	0.0799321	0.81041
ENSG00000153789	16	85098358	85112472	-	FAM92B	protein_coding	1787.25	-0.329202	0.188017	-1.75091	0.0799607	0.81041
ENSG00000160191	21	42653621	42775509	+	PDE9A	protein_coding	172.388	0.716426	0.409228	1.75067	0.0800021	0.81041
ENSG00000241484	22	44752558	44862788	+	ARHGAP8	protein_coding	74.9622	0.663	0.378489	1.7517	0.0798252	0.81041
ENSG00000197670	20	53552770	53575863	+	AL157838.1	lncRNA	162.025	0.716923	0.409606	1.75027	0.080071	0.810545
ENSG00000006282	17	50543058	50555852	+	SPATA20	protein_coding	343.447	0.396556	0.226712	1.74917	0.0802624	0.81101
ENSG00000101464	20	34560542	34698790	-	PIGU	protein_coding	571.561	-0.322223	0.18424	-1.74893	0.0803029	0.81101
ENSG00000177106	11	694438	727727	+	EPS8L2	protein_coding	1954.06	0.498397	0.285002	1.74875	0.0803339	0.81101
ENSG00000178821	1	1917590	1919279	-	TMEM52	protein_coding	28.1759	-0.884286	0.505676	-1.74872	0.0803393	0.81101
ENSG00000113361	5	31193686	31329146	+	CDH6	protein_coding	230.265	1.27463	0.729467	1.74734	0.0805781	0.812858
ENSG00000248712	11	119189638	119196769	-	CCDC153	protein_coding	627.912	-0.29507	0.168924	-1.74676	0.0806792	0.813315
ENSG00000159674	4	1166932	1208962	-	SPON2	protein_coding	777.297	0.483035	0.276736	1.74547	0.0809024	0.815003
ENSG00000172465	X	103628704	103630953	+	TCEAL1	protein_coding	306.838	-0.405131	0.232181	-1.7449	0.0810031	0.815454
ENSG00000141384	18	26225936	26391685	+	TAF4B	protein_coding	39.5807	0.75046	0.430326	1.74393	0.0811704	0.81613
ENSG00000228363	2	86562070	86618766	+	AC015971.1	lncRNA	21.8062	0.992841	0.569333	1.74387	0.0811822	0.81613
ENSG00000137720	11	111878935	111885975	+	C11orf1	protein_coding	320.192	-0.35495	0.203763	-1.74197	0.0815129	0.81889
ENSG00000100395	22	41205282	41231271	+	L3MBTL2	protein_coding	325.486	-0.405406	0.23281	-1.74136	0.081621	0.819412
ENSG00000176903	14	73711783	73714384	-	PNMA1	protein_coding	388.201	0.555409	0.319068	1.74072	0.0817322	0.819964
ENSG00000003402	2	201116154	201176687	+	CFLAR	protein_coding	3390.32	0.271027	0.15599	1.73746	0.0823054	0.820066
ENSG00000004059	7	127588386	127591700	+	ARF5	protein_coding	811.886	0.373102	0.214786	1.73708	0.0823724	0.820066
ENSG00000021762	11	3087107	3166739	-	OSBPL5	protein_coding	201.753	0.493131	0.284074	1.73592	0.0825772	0.820066
ENSG00000067221	15	73978926	73994622	-	STOML1	protein_coding	69.3619	0.770771	0.44326	1.73887	0.0820574	0.820066
ENSG00000076685	10	103088017	103193306	-	NT5C2	protein_coding	1907.54	0.293603	0.169152	1.73574	0.0826104	0.820066
ENSG00000100599	14	92513781	92688994	+	AL159141.1	protein_coding	82.1399	0.722479	0.416502	1.73464	0.0828054	0.820066
ENSG00000106330	7	100612102	100615384	+	MOSPD3	protein_coding	151.839	0.472629	0.271828	1.73871	0.0820864	0.820066
ENSG00000107130	9	130172404	130237303	+	NCS1	protein_coding	431.824	0.459552	0.264844	1.73518	0.0827085	0.820066
ENSG00000111737	12	120095099	120117502	-	RAB35	protein_coding	289.943	0.457903	0.263949	1.73482	0.0827734	0.820066
ENSG00000128394	22	39040604	39055972	+	APOBEC3F	protein_coding	172.737	0.532925	0.307231	1.73461	0.0828106	0.820066
ENSG00000132507	17	7306999	7312463	+	EIF5A	protein_coding	1277.91	0.415917	0.239394	1.73737	0.0823218	0.820066
ENSG00000135916	2	230864639	230879248	+	ITM2C	protein_coding	273.144	0.387118	0.22248	1.74001	0.0818569	0.820066
ENSG00000157693	9	114611206	114646422	+	TMEM268	protein_coding	214.229	0.425703	0.245243	1.73584	0.0825914	0.820066
ENSG00000158793	1	161118086	161125445	+	NIT1	protein_coding	577.315	-0.260126	0.149759	-1.73696	0.0823947	0.820066
ENSG00000168795	9	37438102	37465450	-	ZBTB5	protein_coding	580.908	-0.334633	0.1929	-1.73475	0.0827852	0.820066
ENSG00000176714	2	27625639	27629012	-	CCDC121	protein_coding	220.476	-0.442528	0.254888	-1.73616	0.0825351	0.820066
ENSG00000178573	16	79585843	79600737	-	MAF	protein_coding	313.749	0.530204	0.305662	1.73461	0.0828097	0.820066
ENSG00000203799	6	109165831	109355063	+	CCDC162P	transcribed_unitary_pseudogene	568.209	-0.413876	0.238348	-1.73644	0.0824866	0.820066
ENSG00000256269	11	119084866	119093549	+	HMBS	protein_coding	322.496	-0.378379	0.217939	-1.73617	0.0825345	0.820066
ENSG00000077235	16	27459555	27549913	-	GTF3C1	protein_coding	900.65	0.482085	0.278551	1.73068	0.0835081	0.821056
ENSG00000102100	X	48903180	48911958	-	SLC35A2	protein_coding	566.726	0.436338	0.251725	1.73339	0.0830258	0.821056
ENSG00000103855	15	73683966	73714514	+	CD276	protein_coding	519.097	0.668486	0.385831	1.73258	0.0831696	0.821056
ENSG00000105223	19	40348456	40380439	+	PLD3	protein_coding	1391.63	0.529421	0.306038	1.72992	0.0836452	0.821056
ENSG00000112343	6	25962802	25991231	+	TRIM38	protein_coding	1158.32	0.29508	0.170598	1.72967	0.0836885	0.821056
ENSG00000122741	9	37800554	37867666	+	DCAF10	protein_coding	509.944	0.362796	0.209637	1.73059	0.0835245	0.821056
ENSG00000126458	19	49635292	49640143	-	RRAS	protein_coding	602.149	0.53256	0.307392	1.73251	0.0831824	0.821056
ENSG00000150760	10	126905409	127452517	+	DOCK1	protein_coding	549.681	0.284136	0.164277	1.72962	0.0836985	0.821056
ENSG00000166670	11	102770502	102780628	-	MMP10	protein_coding	1978.1	0.63825	0.368584	1.73163	0.0833402	0.821056
ENSG00000167106	9	127940582	127980989	-	FAM102A	protein_coding	1544.08	0.552086	0.31871	1.73225	0.0832289	0.821056
ENSG00000175197	12	57516588	57521737	-	DDIT3	protein_coding	710.922	0.739788	0.427543	1.73033	0.083572	0.821056
ENSG00000233912	3	5156905	5187329	-	AC026202.2	lncRNA	24.9047	1.06859	0.617395	1.7308	0.083488	0.821056
ENSG00000272899	7	128866330	128872047	+	ATP6V1FNB	protein_coding	102.211	0.745187	0.430155	1.73237	0.0832083	0.821056
ENSG00000281420	21	43748365	43748468	-	AP001052.1	pseudogene	34.4636	1.15558	0.667406	1.73146	0.0833704	0.821056
ENSG00000114737	3	50606490	50611831	-	CISH	protein_coding	49.4039	0.912413	0.527939	1.72826	0.0839422	0.821432
ENSG00000139197	12	7188685	7218574	+	PEX5	protein_coding	189.771	0.495613	0.286789	1.72815	0.0839621	0.821432
ENSG00000160785	1	156193932	156212796	+	SLC25A44	protein_coding	175.784	0.481579	0.278638	1.72833	0.0839287	0.821432
ENSG00000231389	6	33064569	33080775	-	HLA-DPA1	protein_coding	933.557	-0.22972	0.132915	-1.72833	0.0839298	0.821432
ENSG00000104140	15	40872214	40874234	-	RHOV	protein_coding	1181.91	0.501028	0.290016	1.72759	0.0840621	0.821859
ENSG00000004142	17	28346633	28357527	-	POLDIP2	protein_coding	499.348	0.405634	0.235031	1.72587	0.0843702	0.822116
ENSG00000058091	7	90466424	91210590	+	CDK14	protein_coding	250.972	0.316707	0.183413	1.72674	0.0842146	0.822116
ENSG00000107902	10	124461823	124617888	+	LHPP	protein_coding	268.091	0.382566	0.221592	1.72645	0.084267	0.822116
ENSG00000179862	1	40861054	40862363	-	CITED4	protein_coding	367.969	1.27635	0.739042	1.72704	0.0841614	0.822116
ENSG00000215193	22	18077920	18131138	+	PEX26	protein_coding	537.21	0.311532	0.180495	1.72599	0.0843496	0.822116
ENSG00000107341	9	33817160	33920399	+	UBE2R2	protein_coding	688.543	0.394582	0.228803	1.72455	0.0846083	0.823886
ENSG00000116874	1	119031216	119140671	-	WARS2	protein_coding	337.921	-0.362271	0.21013	-1.72403	0.0847023	0.824251
ENSG00000033327	11	78215293	78418348	-	GAB2	protein_coding	137.903	0.520434	0.302271	1.72175	0.0851154	0.824538
ENSG00000099250	10	33177492	33336262	-	NRP1	protein_coding	124.577	0.546766	0.317282	1.72328	0.0848378	0.824538
ENSG00000126107	1	45002540	45011324	-	HECTD3	protein_coding	222.243	0.470331	0.273144	1.72192	0.0850844	0.824538
ENSG00000136205	7	47275154	47582558	-	TNS3	protein_coding	229.927	0.599506	0.348186	1.7218	0.0851057	0.824538
ENSG00000156206	15	81007033	81149179	+	CFAP161	protein_coding	1047.82	-0.434007	0.252083	-1.72168	0.0851275	0.824538
ENSG00000166165	14	103519667	103522833	-	CKB	protein_coding	2314.09	0.394633	0.229143	1.72221	0.0850317	0.824538
ENSG00000167759	19	51055626	51065114	-	KLK13	protein_coding	48.0185	0.949001	0.551114	1.72197	0.0850751	0.824538
ENSG00000116885	1	36415827	36450451	-	OSCP1	protein_coding	1686.36	-0.289624	0.168278	-1.72111	0.0852316	0.824681
ENSG00000135363	11	33858576	33892076	-	LMO2	protein_coding	354.441	0.493083	0.286513	1.72098	0.0852553	0.824681
ENSG00000079805	19	10718079	10833488	+	DNM2	protein_coding	1686.18	0.474562	0.276019	1.71931	0.0855584	0.824992
ENSG00000126012	X	53191321	53225422	-	KDM5C	protein_coding	1091.62	0.326285	0.189731	1.71973	0.0854822	0.824992
ENSG00000140749	16	21639550	21652608	-	IGSF6	protein_coding	71.3583	0.812031	0.472049	1.72023	0.0853912	0.824992
ENSG00000143889	2	38561969	38603586	-	HNRNPLL	protein_coding	766.141	0.232894	0.135463	1.71924	0.0855702	0.824992
ENSG00000175582	11	73675638	73761137	-	RAB6A	protein_coding	1435.1	0.353424	0.20549	1.71991	0.0854491	0.824992
ENSG00000127838	2	218270392	218346793	+	PNKD	protein_coding	657.637	-0.216261	0.125812	-1.71893	0.0856276	0.825
ENSG00000100084	22	19330698	19447450	-	HIRA	protein_coding	67.8107	0.609288	0.354675	1.71788	0.0858184	0.826232
ENSG00000204592	6	30489509	30494194	+	HLA-E	protein_coding	4261.15	0.32894	0.191511	1.7176	0.0858687	0.826232
ENSG00000042088	14	89954939	90044764	+	TDP1	protein_coding	325.343	-0.337923	0.196976	-1.71556	0.0862432	0.826336
ENSG00000108784	17	42536241	42544449	+	NAGLU	protein_coding	134.449	0.555868	0.323821	1.71659	0.0860542	0.826336
ENSG00000114993	2	74425835	74442422	-	RTKN	protein_coding	235.349	0.369837	0.215668	1.71484	0.0863741	0.826336
ENSG00000116299	1	109113679	109206781	+	KIAA1324	protein_coding	215.472	-1.15419	0.673741	-1.7131	0.0866944	0.826336
ENSG00000119681	14	74498183	74612378	-	LTBP2	protein_coding	112.738	0.710162	0.414443	1.71353	0.0866146	0.826336
ENSG00000152229	18	45983536	46072272	-	PSTPIP2	protein_coding	259.147	0.480769	0.280724	1.7126	0.0867859	0.826336
ENSG00000152527	2	43637260	43767987	+	PLEKHH2	protein_coding	292.27	0.39341	0.229522	1.71404	0.0865215	0.826336
ENSG00000158019	2	27889941	28338901	+	BABAM2	protein_coding	542.408	-0.31652	0.184422	-1.71628	0.0861106	0.826336
ENSG00000164402	5	132750819	132807241	-	SEPTIN8	protein_coding	455.849	0.354659	0.207003	1.7133	0.0866573	0.826336
ENSG00000164715	7	98106862	98209638	+	LMTK2	protein_coding	645.454	0.521833	0.304253	1.71513	0.0863216	0.826336
ENSG00000171700	20	64073181	64079988	-	RGS19	protein_coding	48.8705	0.740832	0.432155	1.71427	0.0864785	0.826336
ENSG00000178057	3	49020459	49023495	+	NDUFAF3	protein_coding	579.675	-0.313377	0.182967	-1.71275	0.0867593	0.826336
ENSG00000198791	8	17224966	17246878	-	CNOT7	protein_coding	1281.46	-0.24566	0.143106	-1.71662	0.0860481	0.826336
ENSG00000213719	6	31730581	31739763	-	CLIC1	protein_coding	4768.55	0.296826	0.173188	1.7139	0.0865479	0.826336
ENSG00000228594	1	1598012	1600135	-	FNDC10	protein_coding	29.7565	1.11128	0.648355	1.714	0.0865296	0.826336
ENSG00000255306	11	68024809	68030461	-	AC004923.4	lncRNA	27.8479	-0.858064	0.500505	-1.7144	0.0864558	0.826336
ENSG00000105676	19	19033575	19060311	+	ARMC6	protein_coding	137.091	0.452157	0.264371	1.71031	0.0872082	0.828503
ENSG00000133665	10	80344745	80368073	+	DYDC2	protein_coding	1395.02	-0.336739	0.196886	-1.71032	0.0872059	0.828503
ENSG00000151023	10	24981979	25062279	-	ENKUR	protein_coding	2935.04	-0.282791	0.165392	-1.70982	0.0872997	0.828503
ENSG00000172824	16	66988589	67009758	+	CES4A	protein_coding	385.841	-0.474516	0.277573	-1.70952	0.0873543	0.828503
ENSG00000176222	19	43872365	43901385	-	ZNF404	protein_coding	72.5012	-0.497103	0.290781	-1.70955	0.08735	0.828503
ENSG00000177994	2	54330034	54383742	+	C2orf73	protein_coding	403.216	-0.381079	0.22284	-1.7101	0.0872473	0.828503
ENSG00000157510	5	149271859	149343637	+	AFAP1L1	protein_coding	177.464	0.378986	0.221916	1.70779	0.0876757	0.830608
ENSG00000182858	22	49900229	49918438	-	ALG12	protein_coding	58.2296	0.850817	0.498221	1.70771	0.0876902	0.830608
ENSG00000103356	16	23522016	23557731	-	EARS2	protein_coding	401.428	-0.265223	0.15535	-1.70726	0.0877733	0.830856
ENSG00000100360	22	36758202	36776256	-	IFT27	protein_coding	1249.86	-0.321761	0.188505	-1.70691	0.0878383	0.830932
ENSG00000119328	9	108934400	108950744	+	ABITRAM	protein_coding	1039.16	-0.329967	0.193365	-1.70645	0.0879243	0.831207
ENSG00000253972	8	119214625	119246848	-	MAL2-AS1	lncRNA	59.8553	0.812866	0.47645	1.70609	0.0879918	0.831306
ENSG00000196843	2	96536743	96552634	+	ARID5A	protein_coding	54.1333	0.706471	0.414178	1.70572	0.0880605	0.831416
ENSG00000124782	6	7107597	7251980	+	RREB1	protein_coding	1213.68	0.354708	0.208091	1.70458	0.0882728	0.832882
ENSG00000168894	2	85595725	85597708	+	RNF181	protein_coding	1067.76	-0.31684	0.185913	-1.70424	0.0883366	0.832945
ENSG00000038358	16	67873052	67884499	+	EDC4	protein_coding	249.486	0.589662	0.346116	1.70366	0.0884453	0.833431
ENSG00000136261	7	16646131	16706523	+	BZW2	protein_coding	830.022	-0.344971	0.202661	-1.70221	0.0887166	0.83437
ENSG00000170271	5	154818492	154859252	-	FAXDC2	protein_coding	490.779	-0.351076	0.20618	-1.70276	0.0886124	0.83437
ENSG00000186166	11	118998138	119015793	+	CCDC84	protein_coding	334.383	-0.449494	0.264061	-1.70223	0.0887117	0.83437
ENSG00000134013	8	23296897	23425328	-	LOXL2	protein_coding	45.6075	1.1439	0.672759	1.70032	0.0890716	0.836875
ENSG00000198203	2	108288639	108309915	+	SULT1C2	protein_coding	25.4054	1.36979	0.805676	1.70018	0.0890976	0.836875
ENSG00000112679	6	291630	351355	+	DUSP22	protein_coding	612.009	-0.252458	0.14855	-1.69948	0.0892288	0.837568
ENSG00000134480	5	87318416	87412930	-	CCNH	protein_coding	610.377	-0.343604	0.202373	-1.69788	0.089531	0.837709
ENSG00000141644	18	50266882	50281774	-	MBD1	protein_coding	876.634	0.2754	0.162152	1.69841	0.0894305	0.837709
ENSG00000167333	11	4598672	4608231	-	TRIM68	protein_coding	137.885	0.495925	0.292053	1.69806	0.0894955	0.837709
ENSG00000183696	7	48088628	48108736	+	UPP1	protein_coding	1483.04	0.609549	0.35887	1.69852	0.0894096	0.837709
ENSG00000198053	20	1894167	1940592	+	SIRPA	protein_coding	274.455	0.479552	0.282258	1.69898	0.0893221	0.837709
ENSG00000137504	11	85659708	85682908	-	CREBZF	protein_coding	1123.35	-0.229177	0.135106	-1.69627	0.0898342	0.83947
ENSG00000171817	19	37551406	37614179	+	ZNF540	protein_coding	48.0632	-0.543243	0.320247	-1.69633	0.0898242	0.83947
ENSG00000188505	19	39196964	39201884	+	NCCRP1	protein_coding	844.478	1.10827	0.653771	1.69519	0.090039	0.840307
ENSG00000261329	16	27678940	27718806	-	AC016597.2	lncRNA	24.9212	-0.860694	0.507649	-1.69545	0.08999	0.840307
ENSG00000155254	10	97713173	97718150	+	MARVELD1	protein_coding	80.0183	0.908077	0.535791	1.69483	0.0901071	0.840404
ENSG00000143409	1	150996086	151008375	-	MINDY1	protein_coding	324.579	0.373949	0.22076	1.69392	0.0902808	0.840976
ENSG00000156599	11	57667747	57701182	+	ZDHHC5	protein_coding	1204.55	0.461679	0.272554	1.6939	0.0902837	0.840976
ENSG00000070081	11	17208153	17349980	+	NUCB2	protein_coding	4732.13	-0.396799	0.23448	-1.69225	0.0905984	0.842007
ENSG00000106683	7	74082933	74122525	+	LIMK1	protein_coding	212.184	0.557107	0.329084	1.6929	0.0904739	0.842007
ENSG00000166716	15	84748592	84806445	+	ZNF592	protein_coding	391.041	0.335993	0.198562	1.69214	0.0906199	0.842007
ENSG00000171533	11	75586918	75669120	-	MAP6	protein_coding	659.562	-0.344932	0.203847	-1.69211	0.0906253	0.842007
ENSG00000106554	7	132784870	133082090	-	CHCHD3	protein_coding	917.655	-0.25117	0.148515	-1.69121	0.0907971	0.842067
ENSG00000156675	8	37858618	37899497	-	RAB11FIP1	protein_coding	3647.09	0.527408	0.31206	1.69008	0.0910123	0.842067
ENSG00000157600	X	110002631	110182734	+	TMEM164	protein_coding	366.185	0.504693	0.298625	1.69006	0.0910167	0.842067
ENSG00000175866	17	81035122	81117432	+	BAIAP2	protein_coding	734.395	0.48898	0.289202	1.69079	0.0908763	0.842067
ENSG00000204745	2	87125198	87196629	+	AC083899.1	unprocessed_pseudogene	25.7002	-0.839408	0.496703	-1.68996	0.0910359	0.842067
ENSG00000223797	3	40313802	40453329	-	ENTPD3-AS1	lncRNA	126.747	-0.465728	0.275385	-1.69119	0.0908006	0.842067
ENSG00000275888	17	82244770	82245591	+	AC132872.3	lncRNA	59.5943	0.748343	0.442682	1.69048	0.0909369	0.842067
ENSG00000125845	20	6767686	6780246	+	BMP2	protein_coding	83.718	0.673302	0.398616	1.6891	0.0912003	0.843054
ENSG00000063245	19	55675226	55709858	+	EPN1	protein_coding	631.114	0.533324	0.316306	1.6861	0.0917761	0.844496
ENSG00000117477	1	169394870	169460669	-	CCDC181	protein_coding	400.29	-0.403382	0.239221	-1.68623	0.091752	0.844496
ENSG00000131941	19	32978592	33064888	-	RHPN2	protein_coding	1135.85	0.433962	0.257164	1.68749	0.0915097	0.844496
ENSG00000136068	3	58008400	58172251	+	FLNB	protein_coding	2821.25	0.498409	0.295496	1.68669	0.0916636	0.844496
ENSG00000144591	2	219498867	219506989	+	GMPPA	protein_coding	315.126	-0.396954	0.235458	-1.68588	0.0918195	0.844496
ENSG00000152284	2	85133392	85310387	+	TCF7L1	protein_coding	104.017	0.483102	0.286508	1.68618	0.091762	0.844496
ENSG00000156804	8	123497889	123541206	-	FBXO32	protein_coding	950.35	0.399457	0.236872	1.68638	0.0917225	0.844496
ENSG00000198435	9	137299631	137302271	-	NRARP	protein_coding	476.913	0.470544	0.278956	1.68681	0.0916406	0.844496
ENSG00000089289	X	70133447	70166324	+	IGBP1	protein_coding	1533.33	-0.391042	0.232022	-1.68536	0.0919183	0.844872
ENSG00000156966	2	231395710	231401164	+	B3GNT7	protein_coding	650.482	0.750789	0.445582	1.68496	0.0919958	0.845052
ENSG00000012211	X	49174802	49186528	-	PRICKLE3	protein_coding	154.885	0.464981	0.276626	1.6809	0.0927823	0.845068
ENSG00000084693	2	27042364	27070622	+	AGBL5	protein_coding	408.508	0.318658	0.189597	1.68072	0.092818	0.845068
ENSG00000103502	16	29858357	29863414	-	CDIPT	protein_coding	384.679	0.423239	0.251586	1.68229	0.0925132	0.845068
ENSG00000104969	19	2754715	2783282	-	SGTA	protein_coding	366.96	0.485548	0.288774	1.68141	0.092683	0.845068
ENSG00000119138	9	70384597	70414624	-	KLF9	protein_coding	620.846	0.403277	0.239628	1.68293	0.0923883	0.845068
ENSG00000125746	19	45606994	45645629	-	EML2	protein_coding	941.912	0.268805	0.159706	1.68312	0.0923525	0.845068
ENSG00000136003	12	108562582	108569384	+	ISCU	protein_coding	1626.83	-0.252444	0.150166	-1.6811	0.0927433	0.845068
ENSG00000141349	17	44070735	44076344	+	G6PC3	protein_coding	336.306	0.428717	0.254657	1.68351	0.0922761	0.845068
ENSG00000142453	19	10871513	10923070	+	CARM1	protein_coding	249.362	0.552288	0.328341	1.68206	0.0925577	0.845068
ENSG00000153989	6	117675469	117710727	+	NUS1	protein_coding	811.145	0.299054	0.17767	1.6832	0.0923365	0.845068
ENSG00000157657	9	113876282	114056591	+	ZNF618	protein_coding	76.4269	0.996965	0.593149	1.6808	0.0928017	0.845068
ENSG00000157796	4	39182504	39285810	+	WDR19	protein_coding	2407.36	-0.325781	0.193848	-1.6806	0.0928408	0.845068
ENSG00000160401	9	127706988	127716002	+	CFAP157	protein_coding	1358.19	-0.421306	0.250349	-1.68287	0.0924002	0.845068
ENSG00000169221	16	30357102	30370494	-	TBC1D10B	protein_coding	246.487	0.497416	0.295398	1.68388	0.0922042	0.845068
ENSG00000177951	11	167784	207428	-	BET1L	protein_coding	214.325	0.454777	0.270625	1.68047	0.0928665	0.845068
ENSG00000069020	5	66596361	67169595	+	MAST4	protein_coding	837.163	0.288011	0.171485	1.67951	0.093053	0.845637
ENSG00000114650	3	47413681	47477126	-	SCAP	protein_coding	456.429	0.476252	0.2836	1.67931	0.0930922	0.845637
ENSG00000154099	16	84145287	84178767	+	DNAAF1	protein_coding	3555.34	-0.353091	0.210267	-1.67925	0.093103	0.845637
ENSG00000282851	19	17405686	17419324	+	BISPR	lncRNA	42.6332	1.06569	0.634739	1.67895	0.0931623	0.845649
ENSG00000204574	6	30571393	30597179	+	ABCF1	protein_coding	442.304	0.413305	0.24627	1.67826	0.0932965	0.846341
ENSG00000103512	16	14833721	14896157	+	NOMO1	protein_coding	739.154	0.562439	0.335313	1.67736	0.0934727	0.846638
ENSG00000148288	9	133152948	133163933	-	GBGT1	protein_coding	23.1543	1.14096	0.680274	1.6772	0.0935034	0.846638
ENSG00000166510	18	54901509	54959461	-	CCDC68	protein_coding	166.498	0.593879	0.353971	1.67776	0.093394	0.846638
ENSG00000026025	10	17228241	17237593	+	VIM	protein_coding	167.748	0.562534	0.335731	1.67555	0.0938269	0.847792
ENSG00000143507	1	221701424	221742089	-	DUSP10	protein_coding	953.429	0.501044	0.299013	1.67566	0.0938053	0.847792
ENSG00000160113	19	17231883	17245940	-	NR2F6	protein_coding	756.596	0.520035	0.310401	1.67536	0.0938633	0.847792
ENSG00000172594	6	122789049	122809720	+	SMPDL3A	protein_coding	290.395	-0.34375	0.205127	-1.67579	0.0937793	0.847792
ENSG00000115423	2	84516455	84819589	+	DNAH6	protein_coding	4264.04	-0.326447	0.194984	-1.67422	0.0940865	0.848877
ENSG00000258175	14	28592223	28613623	-	LINC02300	lncRNA	60.5494	-0.791852	0.472986	-1.67416	0.0940998	0.848877
ENSG00000071967	2	171522247	171558129	+	CYBRD1	protein_coding	814.346	-0.4086	0.244478	-1.67132	0.0946588	0.849002
ENSG00000089327	19	35154730	35169881	+	FXYD5	protein_coding	178.301	0.516061	0.308617	1.67217	0.0944903	0.849002
ENSG00000115275	2	74461057	74465410	-	MOGS	protein_coding	366.832	0.52889	0.316081	1.67327	0.0942738	0.849002
ENSG00000115998	2	70149880	70248615	-	C2orf42	protein_coding	307.452	-0.351616	0.210386	-1.67129	0.0946635	0.849002
ENSG00000142784	1	27234632	27308636	+	WDTC1	protein_coding	807.252	0.430018	0.257161	1.67217	0.0944905	0.849002
ENSG00000143578	1	153967534	153974361	+	CREB3L4	protein_coding	223.139	-0.434434	0.259594	-1.67351	0.0942262	0.849002
ENSG00000158089	2	30910467	31155202	-	GALNT14	protein_coding	130.815	0.907117	0.543163	1.67006	0.0949069	0.849002
ENSG00000170088	4	165070608	165208549	-	TMEM192	protein_coding	287.72	-0.289492	0.173353	-1.66995	0.0949285	0.849002
ENSG00000173540	3	49716844	49723951	-	GMPPB	protein_coding	256.579	0.387531	0.232019	1.67025	0.0948692	0.849002
ENSG00000180801	4	113900284	113979727	-	ARSJ	protein_coding	123.791	0.497618	0.297845	1.67073	0.0947757	0.849002
ENSG00000183386	1	37996770	38005606	-	FHL3	protein_coding	25.4234	0.784868	0.469518	1.67165	0.0945941	0.849002
ENSG00000183914	17	7717354	7833744	+	DNAH2	protein_coding	917.706	-0.310446	0.185817	-1.67071	0.0947799	0.849002
ENSG00000187446	15	41230839	41281887	+	CHP1	protein_coding	2342.47	0.42221	0.252773	1.67031	0.0948579	0.849002
ENSG00000241058	10	18545561	18659285	-	NSUN6	protein_coding	216.769	-0.351428	0.210143	-1.67233	0.0944597	0.849002
ENSG00000067225	15	72199029	72231822	-	PKM	protein_coding	10300	0.418973	0.251405	1.66653	0.095608	0.849373
ENSG00000090061	14	99481169	99535044	+	CCNK	protein_coding	100.295	0.631387	0.378749	1.66703	0.0955075	0.849373
ENSG00000101236	20	3927309	4015558	-	RNF24	protein_coding	336.379	0.420798	0.252412	1.66711	0.0954928	0.849373
ENSG00000101596	18	2655738	2805017	+	SMCHD1	protein_coding	1313.17	0.318684	0.191392	1.66508	0.0958959	0.849373
ENSG00000104341	8	97775057	97853013	+	LAPTM4B	protein_coding	1068.18	0.341139	0.204574	1.66756	0.0954036	0.849373
ENSG00000112855	5	140691430	140699305	+	HARS2	protein_coding	683.196	-0.240089	0.143958	-1.66777	0.0953618	0.849373
ENSG00000132259	11	6234765	6244479	+	CNGA4	protein_coding	341.43	-0.388936	0.233578	-1.66512	0.0958881	0.849373
ENSG00000137073	9	33921693	34048949	-	UBAP2	protein_coding	507.921	0.291486	0.174704	1.66845	0.0952262	0.849373
ENSG00000140511	15	88877288	88895626	-	HAPLN3	protein_coding	117.897	0.71582	0.428879	1.66905	0.0951077	0.849373
ENSG00000164039	4	103077592	103099870	-	BDH2	protein_coding	692.354	-0.294445	0.176392	-1.66926	0.0950654	0.849373
ENSG00000174718	12	31959370	31993107	+	RESF1	protein_coding	2082.86	0.427522	0.256708	1.6654	0.0958324	0.849373
ENSG00000183579	22	28883572	29057488	+	ZNRF3	protein_coding	36.4624	0.765183	0.459538	1.66511	0.0958898	0.849373
ENSG00000188636	22	44492583	44498233	-	RTL6	protein_coding	128.06	0.643651	0.386282	1.66627	0.0956592	0.849373
ENSG00000222041	2	87454781	87636740	+	CYTOR	lncRNA	33.7476	0.8688	0.521156	1.66706	0.0955017	0.849373
ENSG00000228794	1	825138	859446	+	LINC01128	lncRNA	129.131	-0.460479	0.276555	-1.66506	0.0959017	0.849373
ENSG00000249621	5	122321291	122323358	-	AC113349.1	lncRNA	122.136	-0.606344	0.363721	-1.66706	0.0955031	0.849373
ENSG00000240065	6	32844136	32859851	+	PSMB9	protein_coding	535.915	0.416404	0.25016	1.66455	0.0960029	0.849754
ENSG00000113456	5	34905260	34918989	-	RAD1	protein_coding	360.239	-0.323882	0.194755	-1.66302	0.0963074	0.851479
ENSG00000117640	1	25818640	25832942	+	MTFR1L	protein_coding	362.858	-0.315314	0.189607	-1.66299	0.0963145	0.851479
ENSG00000179222	X	51803007	51902357	+	MAGED1	protein_coding	2424	-0.411201	0.247336	-1.66252	0.0964094	0.851801
ENSG00000163814	3	45082277	45146422	-	CDCP1	protein_coding	1547.1	0.408943	0.246078	1.66185	0.0965434	0.851954
ENSG00000165006	9	34179005	34252523	+	UBAP1	protein_coding	817.311	0.377477	0.227122	1.662	0.0965121	0.851954
ENSG00000105325	19	3506273	3538330	+	FZR1	protein_coding	312.09	0.482185	0.290239	1.66134	0.0966457	0.852194
ENSG00000160360	9	136327476	136359605	+	GPSM1	protein_coding	77.0617	0.810521	0.487934	1.66113	0.0966876	0.852194
ENSG00000080371	12	71754863	71800286	+	RAB21	protein_coding	644.712	0.331813	0.199811	1.66063	0.0967877	0.852519
ENSG00000080572	X	107206611	107244247	+	PIH1D3	protein_coding	531.043	-0.346903	0.208932	-1.66036	0.0968413	0.852519
ENSG00000134684	1	32775237	32818153	-	YARS1	protein_coding	1213.56	0.335888	0.202361	1.65984	0.0969462	0.852928
ENSG00000143217	1	161070998	161089558	-	NECTIN4	protein_coding	1475.51	0.312263	0.188205	1.65917	0.0970824	0.853097
ENSG00000163040	2	131527675	131533666	+	CCDC74A	protein_coding	1948.74	-0.369848	0.222893	-1.65931	0.0970538	0.853097
ENSG00000184634	X	71118556	71142454	+	MED12	protein_coding	354.773	0.425969	0.256822	1.65861	0.0971934	0.853558
ENSG00000025039	6	89364616	89412273	-	RRAGD	protein_coding	1143.89	0.314677	0.189909	1.65699	0.0975223	0.855231
ENSG00000129680	X	136213220	136256482	-	MAP7D3	protein_coding	188.428	-0.511686	0.309002	-1.65593	0.0977356	0.855231
ENSG00000129968	19	1876810	1885547	-	ABHD17A	protein_coding	708.841	0.339813	0.205184	1.65614	0.0976941	0.855231
ENSG00000140274	15	45114326	45118421	+	DUOXA2	protein_coding	184.552	1.26425	0.763355	1.65617	0.0976873	0.855231
ENSG00000196693	10	42574185	42638570	-	ZNF33B	protein_coding	620.294	-0.333262	0.201227	-1.65615	0.0976913	0.855231
ENSG00000286488	15	81315806	81321258	+	AC103858.3	lncRNA	34.8791	0.720498	0.43491	1.65666	0.0975883	0.855231
ENSG00000089154	12	120127202	120194715	-	GCN1	protein_coding	1380.85	0.424102	0.25621	1.65529	0.0978662	0.855681
ENSG00000187678	5	142310427	142326455	-	SPRY4	protein_coding	26.9844	1.33273	0.805229	1.6551	0.0979044	0.855681
ENSG00000014919	10	99711844	99732100	-	COX15	protein_coding	428.424	-0.248343	0.150193	-1.65349	0.0982303	0.85633
ENSG00000096093	6	52362123	52529886	+	EFHC1	protein_coding	7207.01	-0.325336	0.196887	-1.6524	0.0984532	0.85633
ENSG00000101052	20	43590937	43647299	+	IFT52	protein_coding	1119.99	-0.333801	0.201938	-1.65299	0.0983337	0.85633
ENSG00000109881	11	27330827	27363234	-	CCDC34	protein_coding	415.719	-0.262919	0.159202	-1.65148	0.0986408	0.85633
ENSG00000130347	6	106570771	106629498	-	RTN4IP1	protein_coding	174.472	-0.452302	0.273928	-1.65117	0.0987039	0.85633
ENSG00000132481	17	75874164	75878581	-	TRIM47	protein_coding	121.92	0.591262	0.358072	1.65124	0.0986899	0.85633
ENSG00000148737	10	112950247	113167678	+	TCF7L2	protein_coding	187.329	0.468434	0.283246	1.6538	0.0981677	0.85633
ENSG00000162493	1	13583465	13617957	+	PDPN	protein_coding	123.659	0.625057	0.378012	1.65354	0.0982217	0.85633
ENSG00000168589	16	80540734	80550811	+	DYNLRB2	protein_coding	879.293	-0.403838	0.244342	-1.65275	0.0983807	0.85633
ENSG00000177830	11	867859	915058	-	CHID1	protein_coding	865.962	-0.236689	0.143276	-1.65198	0.0985381	0.85633
ENSG00000180628	10	91163012	91284337	+	PCGF5	protein_coding	800.152	0.356945	0.216201	1.65098	0.0987418	0.85633
ENSG00000228474	2	27070472	27071654	-	OST4	protein_coding	520.723	-0.327415	0.198307	-1.65105	0.0987276	0.85633
ENSG00000269091	19	50043196	50051062	-	AC010624.3	lncRNA	87.3754	-0.558067	0.337361	-1.65422	0.0980837	0.85633
ENSG00000055609	7	152134922	152436005	-	KMT2C	protein_coding	1408.25	0.299447	0.181422	1.65056	0.0988292	0.856578
ENSG00000116285	1	8004404	8026309	-	ERRFI1	protein_coding	1328.12	0.323673	0.196173	1.64993	0.0989564	0.856765
ENSG00000154710	7	66682164	66811464	+	RABGEF1	protein_coding	34.1047	-0.911631	0.552641	-1.64959	0.0990269	0.856765
ENSG00000266714	17	75588058	75626849	+	MYO15B	protein_coding	188.697	-0.370643	0.224684	-1.64962	0.09902	0.856765
ENSG00000079313	19	1815248	1848483	-	REXO1	protein_coding	189.867	0.504344	0.305908	1.64868	0.099213	0.857123
ENSG00000087266	4	2793071	2841098	+	SH3BP2	protein_coding	1019.98	0.385413	0.233824	1.6483	0.0992906	0.857123
ENSG00000130304	19	17468769	17506168	+	SLC27A1	protein_coding	540.21	0.323394	0.196206	1.64824	0.0993034	0.857123
ENSG00000148337	9	128161251	128204383	-	CIZ1	protein_coding	475.199	0.345641	0.209627	1.64884	0.0991809	0.857123
ENSG00000179178	1	43269983	43274002	+	TMEM125	protein_coding	538.832	-0.259448	0.157449	-1.64783	0.0993881	0.857347
ENSG00000087077	7	100867387	100873454	+	TRIP6	protein_coding	696.721	0.400048	0.243004	1.64626	0.0997108	0.858272
ENSG00000095739	10	28677510	28682932	+	BAMBI	protein_coding	21.8786	1.3581	0.82465	1.64688	0.0995818	0.858272
ENSG00000101846	X	7147237	7804358	+	STS	protein_coding	1348.31	0.45509	0.276457	1.64615	0.0997326	0.858272
ENSG00000171940	20	53567065	53609907	-	ZNF217	protein_coding	2646.04	0.251564	0.152845	1.64588	0.0997894	0.858272
ENSG00000197283	6	33419661	33453689	+	SYNGAP1	protein_coding	703.809	-0.349378	0.212267	-1.64594	0.0997764	0.858272
ENSG00000009335	7	157138916	157269370	+	UBE3C	protein_coding	954.822	0.298514	0.182249	1.63794	0.101434	0.858632
ENSG00000068383	10	132537787	132783480	+	INPP5A	protein_coding	158.25	0.444339	0.271688	1.63547	0.10195	0.858632
ENSG00000068885	3	160256986	160399880	-	IFT80	protein_coding	890.514	-0.280776	0.171379	-1.63833	0.101353	0.858632
ENSG00000074706	6	154154496	154356792	-	IPCEF1	protein_coding	25.267	1.12058	0.684895	1.63614	0.101811	0.858632
ENSG00000081803	7	122318411	122886759	-	CADPS2	protein_coding	290.168	-0.366867	0.223724	-1.63982	0.101043	0.858632
ENSG00000100417	22	41576900	41589871	-	PMM1	protein_coding	175.692	-0.504004	0.307476	-1.63916	0.101179	0.858632
ENSG00000103549	16	30761745	30776307	+	RNF40	protein_coding	436.444	0.409126	0.249871	1.63735	0.101557	0.858632
ENSG00000104979	19	13774456	13778773	+	C19orf53	protein_coding	1420.64	-0.296152	0.180163	-1.6438	0.100217	0.858632
ENSG00000106541	7	16791811	16833433	-	AGR2	protein_coding	8880.42	-0.372304	0.226675	-1.64245	0.100496	0.858632
ENSG00000109046	17	27294076	27315926	+	WSB1	protein_coding	1796.77	-0.341842	0.208996	-1.63564	0.101915	0.858632
ENSG00000116604	1	156463727	156500779	-	MEF2D	protein_coding	408.825	0.50295	0.305951	1.64389	0.100199	0.858632
ENSG00000119801	2	30146941	30160533	+	YPEL5	protein_coding	4277.04	-0.273137	0.166524	-1.64022	0.100958	0.858632
ENSG00000123562	X	103675496	103688158	-	MORF4L2	protein_coding	7454.84	-0.258139	0.157098	-1.64317	0.100348	0.858632
ENSG00000129295	8	132570416	132675592	-	LRRC6	protein_coding	1466.29	-0.284657	0.173912	-1.63679	0.101675	0.858632
ENSG00000133958	14	93333219	93707876	+	UNC79	protein_coding	60.5588	-0.660118	0.402146	-1.64149	0.100696	0.858632
ENSG00000140463	15	72686179	72738475	+	BBS4	protein_coding	883.114	-0.314207	0.19175	-1.63863	0.101291	0.858632
ENSG00000141458	18	23506184	23586506	-	NPC1	protein_coding	1447.7	0.399631	0.24391	1.63844	0.10133	0.858632
ENSG00000141562	17	82458180	82490537	+	NARF	protein_coding	1138.86	-0.309952	0.189191	-1.6383	0.101359	0.858632
ENSG00000144840	3	120686681	120742993	-	RABL3	protein_coding	475.524	-0.242313	0.14796	-1.63769	0.101485	0.858632
ENSG00000158828	1	20633458	20651511	+	PINK1	protein_coding	111.493	0.643896	0.392843	1.63907	0.101199	0.858632
ENSG00000158941	8	22604632	22621514	+	CCAR2	protein_coding	493.555	0.390518	0.237951	1.64117	0.100762	0.858632
ENSG00000160993	7	102456238	102464863	-	ALKBH4	protein_coding	37.1552	0.707077	0.431461	1.6388	0.101255	0.858632
ENSG00000167770	11	63985853	64001811	+	OTUB1	protein_coding	1252.55	-0.216513	0.131895	-1.64157	0.10068	0.858632
ENSG00000170579	18	3496032	4455307	-	DLGAP1	protein_coding	22.802	-0.848616	0.517974	-1.63834	0.101351	0.858632
ENSG00000171316	8	60678740	60868028	+	CHD7	protein_coding	503.134	0.306996	0.187656	1.63596	0.101849	0.858632
ENSG00000173327	11	65597756	65615382	-	MAP3K11	protein_coding	330.365	0.489467	0.297972	1.64266	0.100453	0.858632
ENSG00000180263	12	95076749	95217482	-	FGD6	protein_coding	680.615	0.279511	0.170449	1.63986	0.101035	0.858632
ENSG00000184557	17	78356778	78360077	-	SOCS3	protein_coding	220.521	0.81279	0.495456	1.64049	0.100904	0.858632
ENSG00000185808	21	37059170	37073170	-	PIGP	protein_coding	457.973	-0.432584	0.264501	-1.63547	0.10195	0.858632
ENSG00000196182	1	36339624	36385896	-	STK40	protein_coding	527.797	0.367689	0.223941	1.6419	0.10061	0.858632
ENSG00000197386	4	3041422	3243960	+	HTT	protein_coding	1030.29	0.38486	0.234997	1.63773	0.101479	0.858632
ENSG00000204469	6	31620715	31637771	+	PRRC2A	protein_coding	955.638	0.514971	0.313592	1.64217	0.100555	0.858632
ENSG00000204642	6	29722775	29738528	+	HLA-F	protein_coding	352.991	0.542581	0.331516	1.63667	0.1017	0.858632
ENSG00000205730	16	19113932	19121629	+	ITPRIPL2	protein_coding	185.809	0.533312	0.325357	1.63916	0.10118	0.858632
ENSG00000248008	12	120488079	120495946	-	NRAV	lncRNA	1376.48	-0.271417	0.165455	-1.64042	0.100917	0.858632
ENSG00000285210	1	86288704	86320711	-	LINC02795	lncRNA	166.48	-0.510805	0.312274	-1.63576	0.101891	0.858632
ENSG00000157557	21	38805183	38824955	+	ETS2	protein_coding	2080.11	-0.384016	0.234905	-1.63477	0.102097	0.859369
ENSG00000138796	4	107989714	108035175	+	HADH	protein_coding	1116.68	-0.19553	0.119665	-1.63398	0.102264	0.86028
ENSG00000040608	22	20241415	20283246	-	RTN4R	protein_coding	58.0842	0.979396	0.599832	1.63278	0.102514	0.8604
ENSG00000126804	14	64503712	64533690	+	ZBTB1	protein_coding	805.982	-0.209918	0.128528	-1.63325	0.102417	0.8604
ENSG00000167216	18	46917492	47102243	+	KATNAL2	protein_coding	389.203	-0.395138	0.241981	-1.63293	0.102483	0.8604
ENSG00000186976	22	43528744	43812337	-	EFCAB6	protein_coding	613.745	-0.270266	0.165485	-1.63318	0.102431	0.8604
ENSG00000101400	20	33407957	33443763	-	SNTA1	protein_coding	112.876	0.598244	0.366566	1.63202	0.102674	0.861249
ENSG00000136026	12	106237881	106304279	-	CKAP4	protein_coding	1054.64	0.43658	0.267602	1.63145	0.102795	0.861762
ENSG00000167291	17	79932343	80035872	-	TBC1D16	protein_coding	321.513	0.633055	0.388193	1.63078	0.102938	0.862466
ENSG00000079462	19	42297033	42303546	-	PAFAH1B3	protein_coding	217.654	-0.437725	0.268677	-1.62919	0.103273	0.863953
ENSG00000106400	7	101218165	101224190	+	ZNHIT1	protein_coding	1347.38	-0.232115	0.142475	-1.62916	0.10328	0.863953
ENSG00000125912	19	3185563	3209575	+	NCLN	protein_coding	269.153	0.472034	0.289918	1.62816	0.10349	0.863953
ENSG00000134109	3	5187646	5219958	+	EDEM1	protein_coding	661.6	0.372023	0.228491	1.62817	0.103488	0.863953
ENSG00000228598	7	20141916	20153531	+	MACC1-AS1	lncRNA	28.6976	1.2182	0.748285	1.62799	0.103526	0.863953
ENSG00000235106	9	134025481	134034666	+	BRD3OS	protein_coding	280.656	0.427258	0.262447	1.62798	0.10353	0.863953
ENSG00000277639	16	53035690	53052873	-	AC007906.2	protein_coding	5330.59	-0.357565	0.21952	-1.62885	0.103346	0.863953
ENSG00000127863	13	23570370	23676104	+	TNFRSF19	protein_coding	582.304	-0.298541	0.183457	-1.62731	0.103671	0.864634
ENSG00000040199	16	71637835	71724701	-	PHLPP2	protein_coding	91.5661	0.652781	0.40191	1.6242	0.104333	0.86469
ENSG00000085644	16	3129777	3142804	+	ZNF213	protein_coding	82.3863	0.645239	0.397262	1.62422	0.10433	0.86469
ENSG00000094914	12	53307456	53324864	-	AAAS	protein_coding	491.834	-0.227034	0.139676	-1.62544	0.104069	0.86469
ENSG00000104823	19	38815422	38831841	-	ECH1	protein_coding	1451.55	-0.333381	0.205284	-1.624	0.104376	0.86469
ENSG00000110063	11	126304060	126350005	+	DCPS	protein_coding	102.155	0.486796	0.299768	1.62391	0.104395	0.86469
ENSG00000122490	18	79902420	79951657	-	SLC66A2	protein_coding	471.887	0.489743	0.301141	1.62629	0.103888	0.86469
ENSG00000126773	14	60091911	60169133	+	PCNX4	protein_coding	1689.73	-0.284755	0.175069	-1.62653	0.103837	0.86469
ENSG00000128609	7	123536997	123557904	-	NDUFA5	protein_coding	1993.83	-0.310355	0.190954	-1.62529	0.104101	0.86469
ENSG00000129625	5	112876385	112922289	-	REEP5	protein_coding	3297.96	-0.234194	0.144117	-1.62503	0.104156	0.86469
ENSG00000130338	6	158232236	158511828	+	TULP4	protein_coding	367.3	0.383559	0.236224	1.62371	0.104438	0.86469
ENSG00000147813	8	143574785	143578649	-	NAPRT	protein_coding	207.329	0.472193	0.290761	1.62399	0.104378	0.86469
ENSG00000211584	12	47753916	47782751	+	SLC48A1	protein_coding	173.434	0.408643	0.25168	1.62366	0.104448	0.86469
ENSG00000213801	19	52927135	52942601	-	ZNF321P	transcribed_processed_pseudogene	46.335	0.556598	0.342227	1.6264	0.103865	0.86469
ENSG00000013275	19	39971165	39981764	+	PSMC4	protein_coding	1701.31	-0.279508	0.17278	-1.61771	0.105725	0.864995
ENSG00000032444	19	7534004	7561764	+	PNPLA6	protein_coding	397.283	0.591348	0.365446	1.61815	0.10563	0.864995
ENSG00000034239	8	48710789	48735311	-	EFCAB1	protein_coding	4015.16	-0.350662	0.216632	-1.6187	0.105512	0.864995
ENSG00000104427	8	78666089	78719765	+	ZC2HC1A	protein_coding	622.337	-0.307163	0.18972	-1.61903	0.10544	0.864995
ENSG00000116898	1	36455718	36464384	-	MRPS15	protein_coding	955.658	-0.282239	0.174069	-1.62142	0.104927	0.864995
ENSG00000124490	6	49692358	49713590	-	CRISP2	protein_coding	145.047	-0.811402	0.501582	-1.61769	0.10573	0.864995
ENSG00000133275	19	1941172	1981338	+	CSNK1G2	protein_coding	718.788	0.481812	0.297221	1.62105	0.105006	0.864995
ENSG00000133302	5	94618669	94739436	+	SLF1	protein_coding	469.034	-0.300848	0.185744	-1.61969	0.105299	0.864995
ENSG00000133872	8	30063003	30083208	-	SARAF	protein_coding	5175.52	-0.224124	0.138206	-1.62166	0.104876	0.864995
ENSG00000137962	1	94148988	94275068	-	ARHGAP29	protein_coding	666.511	0.348582	0.215104	1.62052	0.10512	0.864995
ENSG00000152348	5	81972023	82276857	+	ATG10	protein_coding	145.399	-0.439467	0.271216	-1.62036	0.105155	0.864995
ENSG00000157870	1	2586491	2591469	+	PRXL2B	protein_coding	155.364	0.722956	0.446696	1.61845	0.105565	0.864995
ENSG00000160194	21	42879644	42913304	+	NDUFV3	protein_coding	639.847	-0.326686	0.201516	-1.62114	0.104987	0.864995
ENSG00000164896	7	151076593	151080866	-	FASTK	protein_coding	472.856	0.326666	0.201468	1.62143	0.104925	0.864995
ENSG00000166689	11	16777297	17014414	-	PLEKHA7	protein_coding	1024.04	0.42854	0.264522	1.62005	0.105221	0.864995
ENSG00000169752	15	75935969	76059795	-	NRG4	protein_coding	104.504	-0.583027	0.360348	-1.61796	0.105672	0.864995
ENSG00000170027	7	76326799	76358991	-	YWHAG	protein_coding	2043.73	0.457667	0.282776	1.61848	0.105559	0.864995
ENSG00000182518	X	55143102	55161310	-	FAM104B	protein_coding	589.5	-0.321587	0.198171	-1.62277	0.104638	0.864995
ENSG00000187091	3	38007496	38029762	-	PLCD1	protein_coding	225.434	0.416626	0.256773	1.62254	0.104687	0.864995
ENSG00000213654	6	32190766	32195523	-	GPSM3	protein_coding	59.5697	0.793466	0.488954	1.62278	0.104636	0.864995
ENSG00000215021	12	6965327	6970753	-	PHB2	protein_coding	1019.44	0.324104	0.200169	1.61915	0.105415	0.864995
ENSG00000099330	19	17226213	17229219	+	OCEL1	protein_coding	168.008	0.615156	0.380635	1.61613	0.106066	0.865798
ENSG00000138131	10	98247690	98268194	-	LOXL4	protein_coding	849.14	0.614914	0.38042	1.61641	0.106006	0.865798
ENSG00000170776	15	85380571	85749358	+	AKAP13	protein_coding	1333.58	0.246484	0.152489	1.61641	0.106006	0.865798
ENSG00000260948	1	111431046	111433068	-	AL390195.3	lncRNA	47.5778	0.617912	0.382326	1.61619	0.106053	0.865798
ENSG00000173467	7	16859412	16881987	-	AGR3	protein_coding	1905.17	-0.348757	0.215878	-1.61553	0.106197	0.866047
ENSG00000204525	6	31268749	31272130	-	HLA-C	protein_coding	6920.14	0.242388	0.150045	1.61544	0.106215	0.866047
ENSG00000171603	1	9728926	9823984	-	CLSTN1	protein_coding	1760.54	0.494504	0.306636	1.61268	0.106815	0.869965
ENSG00000253522	5	160438594	160487426	+	MIR3142HG	lncRNA	24.4545	0.879781	0.545478	1.61286	0.106774	0.869965
ENSG00000006062	17	45263119	45317029	-	MAP3K14	protein_coding	112.656	0.55964	0.347476	1.61059	0.10727	0.870912
ENSG00000007062	4	15963076	16084378	-	PROM1	protein_coding	5572.73	-0.311306	0.193359	-1.60999	0.107399	0.870912
ENSG00000014164	8	143437659	143541447	-	ZC3H3	protein_coding	127.25	0.554588	0.344089	1.61176	0.107014	0.870912
ENSG00000087302	14	51989514	52010694	+	RTRAF	protein_coding	1880.01	-0.24844	0.15427	-1.61042	0.107307	0.870912
ENSG00000103126	16	287440	352723	-	AXIN1	protein_coding	286.449	0.481366	0.298818	1.6109	0.107201	0.870912
ENSG00000110917	12	120687149	120701859	+	MLEC	protein_coding	758.076	0.522128	0.324589	1.60858	0.107707	0.870912
ENSG00000140379	15	79960892	79971196	-	BCL2A1	protein_coding	104.836	0.782575	0.486112	1.60987	0.107427	0.870912
ENSG00000142192	21	25880550	26171128	-	APP	protein_coding	7553.1	0.485395	0.301738	1.60867	0.107689	0.870912
ENSG00000142409	19	56087366	56121295	-	ZNF787	protein_coding	311.453	0.390924	0.242951	1.60906	0.107602	0.870912
ENSG00000144485	2	238238267	238240662	-	HES6	protein_coding	156.487	0.656474	0.407662	1.61034	0.107324	0.870912
ENSG00000157978	1	25543606	25568886	+	LDLRAP1	protein_coding	597.898	0.306883	0.190701	1.60924	0.107565	0.870912
ENSG00000181026	15	88621337	88632281	+	AEN	protein_coding	185.611	0.541226	0.335842	1.61155	0.10706	0.870912
ENSG00000185432	12	50923472	50932510	+	METTL7A	protein_coding	1700.92	0.480483	0.298634	1.60894	0.10763	0.870912
ENSG00000159433	15	42575606	42720998	+	STARD9	protein_coding	98.3356	-0.44502	0.276711	-1.60824	0.107782	0.87103
ENSG00000030582	17	44345246	44353106	+	GRN	protein_coding	4813.96	0.534753	0.332957	1.60607	0.108258	0.873037
ENSG00000068654	2	86020216	86106155	-	POLR1A	protein_coding	277.661	0.462042	0.287902	1.60486	0.108525	0.873037
ENSG00000100139	22	37905657	37942822	+	MICALL1	protein_coding	731.986	0.459514	0.286265	1.6052	0.108449	0.873037
ENSG00000112335	6	108211222	108261246	-	SNX3	protein_coding	1961.17	0.303882	0.189296	1.60532	0.108423	0.873037
ENSG00000131203	8	39902275	39928790	+	IDO1	protein_coding	779.763	1.34316	0.837464	1.60385	0.108748	0.873037
ENSG00000164442	6	139371807	139374648	-	CITED2	protein_coding	305.197	0.51831	0.323101	1.60417	0.108676	0.873037
ENSG00000165915	11	47407132	47416496	+	SLC39A13	protein_coding	196.545	0.555152	0.34563	1.6062	0.108229	0.873037
ENSG00000166128	15	63189560	63267776	+	RAB8B	protein_coding	724.982	0.294541	0.183593	1.60432	0.108645	0.873037
ENSG00000171105	19	7112255	7294414	-	INSR	protein_coding	1215.48	0.480981	0.299411	1.60642	0.108181	0.873037
ENSG00000172830	11	67303478	67312607	+	SSH3	protein_coding	1016.62	0.330764	0.206001	1.60564	0.108353	0.873037
ENSG00000203985	1	54007298	54018186	-	LDLRAD1	protein_coding	2701.99	-0.280439	0.174717	-1.60511	0.108471	0.873037
ENSG00000240859	7	149549	155465	+	AC093627.4	lncRNA	51.5827	-0.728384	0.454109	-1.60399	0.108717	0.873037
ENSG00000169314	22	23763021	23765861	+	C22orf15	protein_coding	468.699	-0.407172	0.253967	-1.60325	0.108879	0.87313
ENSG00000203485	14	104689606	104722535	+	INF2	protein_coding	861.901	0.496077	0.309402	1.60334	0.108859	0.87313
ENSG00000005189	16	20806429	20849668	+	REXO5	protein_coding	189.77	-0.463076	0.289069	-1.60196	0.109165	0.873457
ENSG00000114853	3	42653697	42667580	+	ZBTB47	protein_coding	76.6217	0.640315	0.399789	1.60163	0.109237	0.873457
ENSG00000120539	10	27154824	27186924	+	MASTL	protein_coding	187.517	0.452495	0.282773	1.60021	0.109553	0.873457
ENSG00000120963	8	101177878	101206193	-	ZNF706	protein_coding	651.991	0.250165	0.156319	1.60035	0.109521	0.873457
ENSG00000138744	4	75913660	75941013	-	NAAA	protein_coding	516.534	-0.249423	0.155855	-1.60035	0.109521	0.873457
ENSG00000148331	9	129634604	129642169	-	ASB6	protein_coding	109.632	0.4876	0.304381	1.60194	0.109169	0.873457
ENSG00000150628	4	176184579	176195585	-	SPATA4	protein_coding	278.222	-0.44407	0.277557	-1.59992	0.109616	0.873457
ENSG00000155530	7	134127299	134264591	+	LRGUK	protein_coding	479.313	-0.320708	0.200369	-1.60059	0.109469	0.873457
ENSG00000169972	1	1308597	1311677	+	PUSL1	protein_coding	94.76	-0.49213	0.307312	-1.6014	0.109288	0.873457
ENSG00000186591	7	129830732	129952960	-	UBE2H	protein_coding	2754.25	0.461218	0.288294	1.59982	0.109639	0.873457
ENSG00000225663	17	81822361	81833302	-	MCRIP1	protein_coding	203.818	0.375418	0.234545	1.60062	0.10946	0.873457
ENSG00000234964	11	59781318	59781722	-	FABP5P7	processed_pseudogene	52.8902	-0.826772	0.516293	-1.60136	0.109297	0.873457
ENSG00000100014	22	24270817	24417739	+	SPECC1L	protein_coding	191.285	0.268648	0.168012	1.59898	0.109824	0.873503
ENSG00000173267	10	86958599	86963258	+	SNCG	protein_coding	109.182	0.784042	0.490182	1.59949	0.109712	0.873503
ENSG00000203950	X	135050932	135052196	-	RTL8A	protein_coding	270.183	-0.320243	0.200253	-1.59919	0.109779	0.873503
ENSG00000036448	8	2045046	2165552	+	MYOM2	protein_coding	93.6643	-0.785639	0.491428	-1.59868	0.109891	0.873556
ENSG00000168487	8	22165140	22212326	+	BMP1	protein_coding	530.419	0.446058	0.279077	1.59833	0.109969	0.873701
ENSG00000163879	1	37556919	37566857	+	DNALI1	protein_coding	4560.78	-0.300644	0.188195	-1.59752	0.110151	0.874672
ENSG00000128309	22	37019635	37029822	+	MPST	protein_coding	499.369	0.405527	0.253953	1.59686	0.110298	0.875361
ENSG00000088727	3	47228026	47283451	-	KIF9	protein_coding	810.507	-0.378545	0.237134	-1.59634	0.110414	0.875804
ENSG00000065970	12	8032716	8055517	+	FOXJ2	protein_coding	156.451	0.416439	0.26151	1.59244	0.111286	0.876023
ENSG00000066185	1	42430329	42456253	-	ZMYND12	protein_coding	476.885	-0.314443	0.197285	-1.59385	0.11097	0.876023
ENSG00000072954	19	16661139	16690023	+	TMEM38A	protein_coding	80.9024	0.721461	0.453424	1.59114	0.111578	0.876023
ENSG00000075618	7	5592816	5606655	+	FSCN1	protein_coding	1396.95	0.621435	0.390294	1.59222	0.111335	0.876023
ENSG00000090621	1	39560816	39576790	-	PABPC4	protein_coding	881.381	0.363965	0.228416	1.59343	0.111064	0.876023
ENSG00000091640	17	4959226	4967817	-	SPAG7	protein_coding	886.559	-0.273145	0.171442	-1.59322	0.111112	0.876023
ENSG00000105825	7	93885396	93890753	-	TFPI2	protein_coding	683.596	0.548188	0.344038	1.59339	0.111072	0.876023
ENSG00000106266	7	2251770	2354318	-	SNX8	protein_coding	172.8	0.425935	0.26704	1.59502	0.110707	0.876023
ENSG00000108551	17	17494437	17496395	-	RASD1	protein_coding	39.163	1.3165	0.828084	1.58981	0.111877	0.876023
ENSG00000111275	12	111766887	111817532	+	ALDH2	protein_coding	562.941	0.440359	0.276183	1.59445	0.110836	0.876023
ENSG00000117614	1	25222276	25232502	-	SYF2	protein_coding	1482.5	-0.291395	0.183113	-1.59134	0.111534	0.876023
ENSG00000131669	9	93121496	93134251	-	NINJ1	protein_coding	498.628	0.495604	0.311112	1.59301	0.111158	0.876023
ENSG00000135253	7	128862451	128910719	-	KCP	protein_coding	311.328	0.589345	0.370565	1.59039	0.111746	0.876023
ENSG00000135919	2	223975045	224039318	-	SERPINE2	protein_coding	347.906	0.617406	0.387303	1.59411	0.11091	0.876023
ENSG00000136147	13	49495610	49528981	+	PHF11	protein_coding	514.617	0.362693	0.228046	1.59044	0.111736	0.876023
ENSG00000143536	1	152409243	152414263	-	CRNN	protein_coding	574.325	2.39356	1.49984	1.59588	0.110517	0.876023
ENSG00000161513	17	74862497	74873031	-	FDXR	protein_coding	506.398	0.314829	0.197738	1.59215	0.111352	0.876023
ENSG00000161896	6	33721662	33746905	-	IP6K3	protein_coding	36.8832	-0.826577	0.519929	-1.58979	0.111883	0.876023
ENSG00000163482	2	218672069	218702716	+	STK36	protein_coding	1947.03	-0.338674	0.213017	-1.58989	0.111859	0.876023
ENSG00000172578	3	183487551	183555706	-	KLHL6	protein_coding	1163.74	-0.286587	0.179915	-1.5929	0.111183	0.876023
ENSG00000239467	2	170766878	170778729	+	AC007405.4	lncRNA	127.018	-0.452365	0.283646	-1.59482	0.110752	0.876023
ENSG00000258704	14	34920858	34982532	-	SRP54-AS1	transcribed_unitary_pseudogene	21.7447	-1.009	0.633979	-1.59153	0.11149	0.876023
ENSG00000267534	19	10221433	10231331	-	S1PR2	protein_coding	49.6385	0.804822	0.506148	1.59009	0.111813	0.876023
ENSG00000286042	6	79307669	79313384	-	LCAL1	lncRNA	28.3461	0.787899	0.49555	1.58995	0.111847	0.876023
ENSG00000158435	2	101252886	101270316	+	CNOT11	protein_coding	639.373	0.316979	0.19953	1.58863	0.112144	0.876656
ENSG00000183049	10	12349482	12835545	+	CAMK1D	protein_coding	970.574	0.413934	0.260523	1.58886	0.112092	0.876656
ENSG00000261188	22	26512537	26514568	+	Z95115.1	lncRNA	142.523	-0.544603	0.342739	-1.58898	0.112066	0.876656
ENSG00000069188	17	73334384	73644445	-	SDK2	protein_coding	62.944	0.883453	0.556745	1.58682	0.112554	0.877659
ENSG00000076356	1	208022242	208244384	-	PLXNA2	protein_coding	323.462	0.495204	0.312575	1.58427	0.113131	0.877659
ENSG00000101150	20	63865228	63891545	+	TPD52L2	protein_coding	1137.88	0.35606	0.224832	1.58368	0.113268	0.877659
ENSG00000101940	X	48590042	48608869	+	WDR13	protein_coding	577.3	0.277873	0.175495	1.58337	0.113338	0.877659
ENSG00000105568	19	52190048	52229518	+	PPP2R1A	protein_coding	2358.68	0.302118	0.190548	1.58552	0.112848	0.877659
ENSG00000126838	12	9148840	9208395	-	PZP	protein_coding	356.733	-0.727893	0.459192	-1.58516	0.11293	0.877659
ENSG00000127955	7	79768028	80226181	+	GNAI1	protein_coding	1146.1	-0.29076	0.183468	-1.5848	0.113011	0.877659
ENSG00000133739	8	85107215	85146080	+	LRRCC1	protein_coding	282.044	-0.445916	0.281213	-1.58569	0.11281	0.877659
ENSG00000140577	15	90529923	90645345	+	CRTC3	protein_coding	132.843	0.38081	0.240019	1.58658	0.112607	0.877659
ENSG00000153317	8	130052104	130443674	-	ASAP1	protein_coding	178.955	0.482128	0.304172	1.58505	0.112955	0.877659
ENSG00000162961	2	31867809	32039805	-	DPY30	protein_coding	1581.59	-0.345172	0.217845	-1.58448	0.113084	0.877659
ENSG00000165309	10	22928024	23038523	+	ARMC3	protein_coding	4569.36	-0.309372	0.19503	-1.58628	0.112676	0.877659
ENSG00000167671	19	4444999	4457794	-	UBXN6	protein_coding	1105.81	0.330361	0.208615	1.58359	0.113287	0.877659
ENSG00000169105	15	40470998	40474571	+	CHST14	protein_coding	45.7399	0.77731	0.490645	1.58426	0.113134	0.877659
ENSG00000176476	16	28553915	28591790	+	SGF29	protein_coding	68.168	-0.470136	0.29681	-1.58396	0.113202	0.877659
ENSG00000186160	1	47067231	47118318	+	CYP4Z1	protein_coding	76.727	-0.863896	0.544335	-1.58707	0.112497	0.877659
ENSG00000189159	17	75135248	75168281	-	JPT1	protein_coding	841.682	0.331136	0.209144	1.58329	0.113355	0.877659
ENSG00000198612	2	237085882	237100474	+	COPS8	protein_coding	1476.26	-0.298167	0.188155	-1.58469	0.113037	0.877659
ENSG00000009954	7	73440406	73522293	-	BAZ1B	protein_coding	808.18	0.31609	0.199721	1.58266	0.113499	0.877842
ENSG00000285693	11	72793624	72814054	-	AP002381.2	lncRNA	26.3902	-1.05803	0.668471	-1.58276	0.113477	0.877842
ENSG00000106772	9	76611376	76906114	-	PRUNE2	protein_coding	491.2	-0.354452	0.224187	-1.58105	0.113866	0.878351
ENSG00000113163	5	75356345	75512138	-	CERT1	protein_coding	1300.17	0.21059	0.133136	1.58176	0.113705	0.878351
ENSG00000120306	5	140175156	140282052	+	CYSTM1	protein_coding	2406.84	-0.33071	0.209118	-1.58145	0.113775	0.878351
ENSG00000166033	10	122458551	122514907	+	HTRA1	protein_coding	517.374	-0.359431	0.227333	-1.58108	0.11386	0.878351
ENSG00000182087	19	1009648	1021179	-	TMEM259	protein_coding	869.285	0.36025	0.227733	1.5819	0.113673	0.878351
ENSG00000130725	19	58555712	58558954	-	UBE2M	protein_coding	471.754	0.423748	0.268146	1.58029	0.114041	0.879235
ENSG00000096384	6	44246166	44253888	+	HSP90AB1	protein_coding	31891.7	-0.227083	0.143778	-1.5794	0.114244	0.879965
ENSG00000174720	4	112637107	112657592	+	LARP7	protein_coding	733.555	-0.308593	0.195392	-1.57935	0.114256	0.879965
ENSG00000101782	18	23453287	23486603	+	RIOK3	protein_coding	3353.55	0.22679	0.143689	1.57833	0.114489	0.880365
ENSG00000103534	16	19410496	19499113	+	TMC5	protein_coding	6605.12	-0.287712	0.182251	-1.57866	0.114414	0.880365
ENSG00000132780	1	45583846	45618904	+	NASP	protein_coding	1270.03	-0.287281	0.182009	-1.57839	0.114477	0.880365
ENSG00000092871	17	35005990	35089319	-	RFFL	protein_coding	264.534	0.348548	0.220895	1.57789	0.114592	0.880689
ENSG00000090971	19	55485188	55487568	+	NAT14	protein_coding	219.915	0.394457	0.250075	1.57735	0.114715	0.881172
ENSG00000183751	16	1972053	1982929	+	TBL3	protein_coding	203.627	0.490343	0.310927	1.57704	0.114787	0.881265
ENSG00000185122	8	144291591	144314720	+	HSF1	protein_coding	648.857	0.445312	0.282422	1.57676	0.11485	0.881283
ENSG00000170906	19	54102728	54109257	+	NDUFA3	protein_coding	1008.11	-0.29342	0.186246	-1.57544	0.115154	0.883151
ENSG00000111667	12	6852128	6866632	+	USP5	protein_coding	393.36	0.394933	0.250728	1.57515	0.115223	0.883211
ENSG00000100401	22	41245611	41286251	-	RANGAP1	protein_coding	843.063	0.406824	0.258369	1.57458	0.115353	0.883591
ENSG00000171763	15	45402336	45421415	+	SPATA5L1	protein_coding	111.781	0.453658	0.288145	1.57441	0.115393	0.883591
ENSG00000136877	9	127794597	127814327	+	FPGS	protein_coding	368.434	0.452875	0.287699	1.57412	0.115459	0.883629
ENSG00000125755	19	45815410	45863194	-	SYMPK	protein_coding	569.44	0.371067	0.235783	1.57376	0.115542	0.883804
ENSG00000179387	4	140524168	140553770	+	ELMOD2	protein_coding	1127.42	-0.255541	0.162569	-1.5719	0.115975	0.886648
ENSG00000177508	16	54283304	54286787	-	IRX3	protein_coding	235.798	0.416081	0.264745	1.57163	0.116037	0.88666
ENSG00000075292	2	71276561	71435069	+	ZNF638	protein_coding	3557.27	-0.260666	0.166124	-1.56911	0.116622	0.887799
ENSG00000112183	6	17281361	17293871	+	RBM24	protein_coding	231.256	-0.383768	0.244693	-1.56837	0.116795	0.887799
ENSG00000115457	2	216632828	216664436	+	IGFBP2	protein_coding	3810.11	0.394955	0.251608	1.56972	0.116479	0.887799
ENSG00000118263	2	207074137	207167267	-	KLF7	protein_coding	731.45	0.387989	0.247236	1.56931	0.116576	0.887799
ENSG00000119321	9	113161006	113221318	-	FKBP15	protein_coding	1422.86	-0.238677	0.152169	-1.5685	0.116764	0.887799
ENSG00000135972	2	105038069	105099960	+	MRPS9	protein_coding	199.713	-0.300944	0.191876	-1.56843	0.11678	0.887799
ENSG00000156510	10	69220332	69267552	+	HKDC1	protein_coding	26.4627	1.51743	0.966435	1.57014	0.116383	0.887799
ENSG00000185813	17	81900965	81911464	-	PCYT2	protein_coding	620.414	0.358579	0.228333	1.57042	0.116317	0.887799
ENSG00000230453	9	33524394	33573009	+	ANKRD18B	protein_coding	124.736	-0.498631	0.317758	-1.56922	0.116597	0.887799
ENSG00000270728	1	19297080	19297903	+	AL035413.1	processed_pseudogene	23.8798	-0.751526	0.478591	-1.57029	0.116348	0.887799
ENSG00000011198	3	43690108	43734371	+	ABHD5	protein_coding	1246.56	-0.234362	0.149745	-1.56507	0.117567	0.888498
ENSG00000012061	19	45407333	45478828	-	ERCC1	protein_coding	919.375	-0.356497	0.227923	-1.56411	0.117791	0.888498
ENSG00000024862	6	138773509	138793319	+	CCDC28A	protein_coding	869.163	-0.32999	0.211658	-1.55907	0.118979	0.888498
ENSG00000070756	8	100685816	100722809	-	PABPC1	protein_coding	10734.7	0.382308	0.244918	1.56096	0.118533	0.888498
ENSG00000083168	8	41929479	42051994	-	KAT6A	protein_coding	812.688	0.231307	0.148023	1.56264	0.118137	0.888498
ENSG00000100239	22	50343304	50445090	+	PPP6R2	protein_coding	594.455	0.351141	0.225037	1.56037	0.118672	0.888498
ENSG00000103111	16	77190835	77202398	+	MON1B	protein_coding	302.888	0.525418	0.336071	1.56341	0.117955	0.888498
ENSG00000105701	19	18531751	18544077	-	FKBP8	protein_coding	1716.16	0.388729	0.24834	1.56531	0.117511	0.888498
ENSG00000108389	17	58489529	58517905	-	MTMR4	protein_coding	438.083	-0.249768	0.159901	-1.56201	0.118285	0.888498
ENSG00000110435	11	34915829	35020591	+	PDHX	protein_coding	987.777	-0.228589	0.145886	-1.5669	0.117137	0.888498
ENSG00000111859	6	11183298	11382348	-	NEDD9	protein_coding	212.821	0.71937	0.461224	1.5597	0.118831	0.888498
ENSG00000117472	1	46175073	46185962	+	TSPAN1	protein_coding	34919.3	-0.235386	0.150222	-1.56692	0.117133	0.888498
ENSG00000118900	16	4846665	4882401	+	UBN1	protein_coding	529.035	0.341589	0.218926	1.5603	0.11869	0.888498
ENSG00000124107	20	45252239	45254564	-	SLPI	protein_coding	53235.7	-0.315117	0.202129	-1.55899	0.118999	0.888498
ENSG00000130723	9	131373636	131500197	+	PRRC2B	protein_coding	1023.42	0.422884	0.270497	1.56336	0.117968	0.888498
ENSG00000132002	19	14514769	14529770	-	DNAJB1	protein_coding	10427.5	0.436964	0.279279	1.56461	0.117674	0.888498
ENSG00000136463	17	63600882	63608365	+	TACO1	protein_coding	124.447	0.496443	0.317701	1.56261	0.118144	0.888498
ENSG00000142197	21	36156782	36294274	+	DOP1B	protein_coding	281.284	0.405165	0.259493	1.56137	0.118436	0.888498
ENSG00000142949	1	43525187	43623666	+	PTPRF	protein_coding	3717.17	0.409528	0.262182	1.562	0.118288	0.888498
ENSG00000148516	10	31318495	31529814	+	ZEB1	protein_coding	53.2401	0.66794	0.426607	1.5657	0.117418	0.888498
ENSG00000163207	1	152908546	152911886	+	IVL	protein_coding	385.873	1.32798	0.850974	1.56055	0.118631	0.888498
ENSG00000165533	14	88824153	88881078	+	TTC8	protein_coding	761.376	-0.302021	0.193596	-1.56005	0.118747	0.888498
ENSG00000166596	17	9576627	9643447	+	CFAP52	protein_coding	2212.38	-0.278719	0.17862	-1.5604	0.118664	0.888498
ENSG00000169925	9	134030305	134068535	-	BRD3	protein_coding	207.891	0.539026	0.344913	1.56279	0.118103	0.888498
ENSG00000171595	17	74274234	74314884	+	DNAI2	protein_coding	776.987	-0.29915	0.191412	-1.56286	0.118086	0.888498
ENSG00000171723	14	66507407	67181803	+	GPHN	protein_coding	214.133	0.337183	0.21561	1.56386	0.117851	0.888498
ENSG00000173599	11	66848417	66958386	-	PC	protein_coding	294.325	0.474656	0.30448	1.55891	0.119019	0.888498
ENSG00000173653	11	66842835	66846552	+	RCE1	protein_coding	162.668	0.471886	0.302127	1.56188	0.118316	0.888498
ENSG00000182108	16	10928891	10942468	-	DEXI	protein_coding	47.434	0.601617	0.384387	1.56513	0.117552	0.888498
ENSG00000183010	17	81932384	81942412	-	PYCR1	protein_coding	65.0438	0.600852	0.383566	1.56649	0.117234	0.888498
ENSG00000214063	11	842812	867116	+	TSPAN4	protein_coding	121.258	0.467503	0.299759	1.5596	0.118856	0.888498
ENSG00000214389	7	98385801	98386584	-	RPS3AP26	processed_pseudogene	98.0165	-0.542468	0.34721	-1.56236	0.118202	0.888498
ENSG00000241112	5	149545383	149545810	-	RPL29P14	processed_pseudogene	36.1701	-0.754431	0.481776	-1.56594	0.117363	0.888498
ENSG00000251322	22	50674415	50733298	+	SHANK3	protein_coding	135.631	0.641574	0.411168	1.56037	0.118672	0.888498
ENSG00000260267	16	31456711	31459736	-	AC026471.1	lncRNA	39.5547	-0.765117	0.488265	-1.56701	0.117111	0.888498
ENSG00000135336	6	87590067	87667453	+	ORC3	protein_coding	666.994	-0.287002	0.18434	-1.55692	0.119491	0.889179
ENSG00000140943	16	84053761	84116942	-	MBTPS1	protein_coding	1000.13	0.381341	0.244773	1.55794	0.119248	0.889179
ENSG00000160216	21	43865223	43987592	+	AGPAT3	protein_coding	858.218	0.453788	0.291512	1.55667	0.11955	0.889179
ENSG00000161091	19	3538261	3574290	-	MFSD12	protein_coding	187.696	0.554642	0.356136	1.55739	0.119378	0.889179
ENSG00000163374	1	155659443	155689000	-	YY1AP1	protein_coding	581.3	-0.22042	0.141616	-1.55646	0.119598	0.889179
ENSG00000188976	1	944203	959309	-	NOC2L	protein_coding	364.488	0.515566	0.330895	1.55809	0.119211	0.889179
ENSG00000226479	2	120217479	120223400	-	TMEM185B	protein_coding	180.347	0.493331	0.316944	1.55652	0.119583	0.889179
ENSG00000270580	16	15104723	15131601	-	AC139256.3	lncRNA	25.1392	-0.641969	0.412404	-1.55665	0.119553	0.889179
ENSG00000137494	11	83193712	83260694	+	ANKRD42	protein_coding	1081.26	-0.259184	0.166662	-1.55515	0.119911	0.891058
ENSG00000112357	6	136822564	136913934	+	PEX7	protein_coding	313.232	-0.268189	0.172547	-1.5543	0.120113	0.891646
ENSG00000165655	10	75397830	75401764	-	ZNF503	protein_coding	163.931	0.718293	0.462059	1.55455	0.120054	0.891646
ENSG00000121858	3	172505508	172523475	-	TNFSF10	protein_coding	5547.59	0.297049	0.191147	1.55403	0.120176	0.891665
ENSG00000146350	6	121079494	121334745	-	TBC1D32	protein_coding	246.845	-0.253008	0.16286	-1.55353	0.120295	0.892095
ENSG00000092621	1	119648411	119744226	+	PHGDH	protein_coding	498.871	0.389983	0.251237	1.55225	0.120602	0.892274
ENSG00000101152	20	63895126	63936031	+	DNAJC5	protein_coding	1260.39	0.476353	0.306823	1.55253	0.120534	0.892274
ENSG00000138279	10	73375101	73414076	-	ANXA7	protein_coding	3197.8	-0.237084	0.152771	-1.5519	0.120687	0.892274
ENSG00000163156	1	151156664	151170296	+	SCNM1	protein_coding	396.882	-0.309799	0.199568	-1.55235	0.120579	0.892274
ENSG00000187624	17	410325	431062	+	C17orf97	protein_coding	74.6895	0.564159	0.363317	1.5528	0.12047	0.892274
ENSG00000204219	1	23380909	23424748	-	TCEA3	protein_coding	174.223	-0.494002	0.318298	-1.55201	0.120659	0.892274
ENSG00000113583	5	133955510	133968674	-	C5orf15	protein_coding	3579.53	-0.224951	0.145014	-1.55124	0.120844	0.892848
ENSG00000117411	1	43978943	43991170	+	B4GALT2	protein_coding	336.737	0.496884	0.320351	1.55106	0.120887	0.892848
ENSG00000104381	8	74321130	74488872	+	GDAP1	protein_coding	394.484	-0.40494	0.261301	-1.54971	0.121212	0.89389
ENSG00000140450	15	97960703	97973833	+	ARRDC4	protein_coding	2003.17	0.241157	0.155597	1.54989	0.121168	0.89389
ENSG00000183011	17	7856685	7885238	-	NAA38	protein_coding	988.089	-0.280674	0.181065	-1.55013	0.121111	0.89389
ENSG00000170522	4	110045846	110199199	-	ELOVL6	protein_coding	790.974	0.396987	0.256254	1.54919	0.121335	0.894348
ENSG00000102900	16	56730118	56850286	+	NUP93	protein_coding	901.027	-0.292657	0.188983	-1.54859	0.12148	0.894404
ENSG00000103351	16	3500976	3539048	+	CLUAP1	protein_coding	1051	-0.294515	0.190189	-1.54854	0.121493	0.894404
ENSG00000132128	1	46261196	46303608	-	LRRC41	protein_coding	904.661	0.284126	0.183497	1.5484	0.121527	0.894404
ENSG00000116918	1	231528541	231566524	+	TSNAX	protein_coding	371.378	-0.250526	0.161841	-1.54798	0.121628	0.8947
ENSG00000080845	20	36306336	36528637	+	DLGAP4	protein_coding	416.194	0.369761	0.238967	1.54733	0.121784	0.8952
ENSG00000130054	X	69505241	69532508	+	FAM155B	protein_coding	34.0823	0.820131	0.53008	1.54718	0.121819	0.8952
ENSG00000230330	16	26032539	26032811	-	HMGN2P3	processed_pseudogene	22.7291	-0.690184	0.44617	-1.54691	0.121886	0.895242
ENSG00000075240	22	46576012	46679790	+	GRAMD4	protein_coding	248.815	0.4898	0.316706	1.54654	0.121973	0.895433
ENSG00000119383	9	129110950	129148946	+	PTPA	protein_coding	1446.24	0.362807	0.234657	1.54612	0.122076	0.895736
ENSG00000011105	12	3077355	3286564	+	TSPAN9	protein_coding	270.673	0.444981	0.288714	1.54125	0.123255	0.896019
ENSG00000013374	7	151341699	151378449	+	NUB1	protein_coding	1317.28	0.319311	0.206774	1.54425	0.122527	0.896019
ENSG00000027697	6	137197484	137219449	-	IFNGR1	protein_coding	3243.01	-0.251383	0.16352	-1.53732	0.124214	0.896019
ENSG00000082641	17	48048329	48061545	+	NFE2L1	protein_coding	2945.05	0.383213	0.24958	1.53543	0.124678	0.896019
ENSG00000087884	11	77821109	77918432	+	AAMDC	protein_coding	29.2248	-0.697819	0.454265	-1.53615	0.124501	0.896019
ENSG00000093183	3	42547969	42601080	-	SEC22C	protein_coding	497.331	-0.309184	0.200535	-1.5418	0.123123	0.896019
ENSG00000100324	22	39399778	39437060	+	TAB1	protein_coding	189.557	0.301978	0.196509	1.53671	0.124365	0.896019
ENSG00000108774	17	42124976	42155044	-	RAB5C	protein_coding	299.601	0.379634	0.247133	1.53615	0.124502	0.896019
ENSG00000118640	2	85561562	85582031	+	VAMP8	protein_coding	4260.7	-0.258391	0.16832	-1.53511	0.124756	0.896019
ENSG00000119630	14	74941834	74955626	-	PGF	protein_coding	51.5281	0.965725	0.627067	1.54007	0.123544	0.896019
ENSG00000124171	20	50731580	50756795	+	PARD6B	protein_coding	265.086	0.370145	0.240468	1.53927	0.123739	0.896019
[truncated: 16,543 more rows]
