# Supplementary material for: A viral assembly inhibitor blocks SARS-CoV-2 replication in airway epithelial cells
Source: Commun Biol. 2024 Apr 22;7:486. doi: 10.1038/s42003-024-06130-8 (PMC11035691; doi:10.1038/s42003-024-06130-8)
Supplement: Supplementary file 4 — Supplementary Data 2 [file 42003_2024_6130_MOESM4_ESM.xlsx]

## Sheet: Table S2
geneID	chrom	start	end	strand	symbol	biotype	baseMean	log2FoldChange	lfcSE	stat	pvalue	padj
ENSG00000144136	2	112645939	112663825	+	SLC20A1	protein_coding	4014.15	3.52689	0.12889	27.3636	7.43555e-165	1.3787e-160
ENSG00000105516	19	48630030	48637379	-	DBP	protein_coding	1180.2	4.41955	0.192049	23.0126	3.48706e-117	3.23285e-113
ENSG00000140450	15	97960703	97973833	+	ARRDC4	protein_coding	2003.17	-3.35042	0.160918	-20.8206	2.81523e-96	1.74e-92
ENSG00000196850	12	110533245	110583318	-	PPTC7	protein_coding	1974.07	2.84178	0.141826	20.0372	2.613e-89	1.21126e-85
ENSG00000120129	5	172768096	172771195	-	DUSP1	protein_coding	5258.69	5.27082	0.263624	19.9937	6.24683e-89	2.31657e-85
ENSG00000138166	10	110497907	110511533	+	DUSP5	protein_coding	3779.18	7.61641	0.406428	18.7399	2.3415e-78	7.23603e-75
ENSG00000204389	6	31815543	31817946	+	HSPA1A	protein_coding	4387.03	5.73266	0.306258	18.7184	3.50535e-78	9.28517e-75
ENSG00000185650	14	68787660	68796253	-	ZFP36L1	protein_coding	10797.8	4.42012	0.237594	18.6037	3.00049e-77	6.95439e-74
ENSG00000089335	19	34677639	34686397	+	ZNF302	protein_coding	586.789	-5.04179	0.27384	-18.4114	1.06389e-75	2.19185e-72
ENSG00000047621	12	4487735	4538508	-	C12orf4	protein_coding	539.906	-3.49	0.189673	-18.4001	1.31157e-75	2.43191e-72
ENSG00000137193	6	37170152	37175428	+	PIM1	protein_coding	1737.57	6.63443	0.366305	18.1118	2.57236e-73	4.33606e-70
ENSG00000125657	19	6531026	6535924	+	TNFSF9	protein_coding	702.086	6.54454	0.372989	17.5462	6.36213e-69	9.83055e-66
ENSG00000204388	6	31827738	31830254	+	HSPA1B	protein_coding	3773.1	5.72629	0.328435	17.4351	4.46974e-68	6.37523e-65
ENSG00000186767	X	63347228	63351332	-	SPIN4	protein_coding	707.999	4.19422	0.243335	17.2364	1.41516e-66	1.87428e-63
ENSG00000186480	7	155297776	155310235	+	INSIG1	protein_coding	5237.95	4.79688	0.280314	17.1126	1.19639e-65	1.47889e-62
ENSG00000143797	2	8852690	9003709	-	MBOAT2	protein_coding	4491.32	2.13123	0.129052	16.5145	2.88569e-61	3.34415e-58
ENSG00000167552	12	49184795	49189080	-	TUBA1A	protein_coding	9738.22	-3.72584	0.226344	-16.461	6.99776e-61	7.20847e-58
ENSG00000173627	1	183646275	183653316	-	APOBEC4	protein_coding	705.842	-4.29021	0.260584	-16.4639	6.6715e-61	7.20847e-58
ENSG00000162086	16	3305406	3318852	+	ZNF75A	protein_coding	277.902	-4.09352	0.25121	-16.2952	1.0675e-59	1.04177e-56
ENSG00000128016	19	39406847	39409412	+	ZFP36	protein_coding	1771.22	4.32854	0.26572	16.2899	1.16473e-59	1.07982e-56
ENSG00000180667	1	207043849	207052980	-	YOD1	protein_coding	3642.87	3.75492	0.231808	16.1984	5.17212e-59	4.56674e-56
ENSG00000157514	X	107713221	107777342	-	TSC22D3	protein_coding	5012.85	4.11462	0.255112	16.1287	1.60369e-58	1.35162e-55
ENSG00000173110	1	161524540	161526894	+	HSPA6	protein_coding	617.788	7.09758	0.445312	15.9384	3.42858e-57	2.76403e-54
ENSG00000164713	7	98252379	98310441	+	BRI3	protein_coding	1532.83	2.73396	0.171986	15.8964	6.71019e-57	5.18418e-54
ENSG00000141738	17	39737927	39747291	+	GRB7	protein_coding	914.931	3.85919	0.242999	15.8815	8.51012e-57	6.31178e-54
ENSG00000069011	5	135027734	135034813	-	PITX1	protein_coding	3453.27	4.63163	0.29197	15.8633	1.13668e-56	8.10629e-54
ENSG00000172932	11	67289300	67302485	+	ANKRD13D	protein_coding	888.035	1.86531	0.119653	15.5894	8.59024e-55	5.89927e-52
ENSG00000129757	11	2883213	2885773	-	CDKN1C	protein_coding	520.726	5.92048	0.380115	15.5755	1.06799e-54	7.07239e-52
ENSG00000204618	6	30070266	30075887	-	RNF39	protein_coding	1232.96	5.74674	0.370025	15.5307	2.15037e-54	1.3749e-51
ENSG00000126368	17	40092793	40100589	-	NR1D1	protein_coding	1055.01	5.58232	0.36056	15.4824	4.56448e-54	2.82115e-51
ENSG00000143217	1	161070998	161089558	-	NECTIN4	protein_coding	1475.51	2.87289	0.186681	15.3893	1.93206e-53	1.15562e-50
ENSG00000070444	17	2384073	2401104	-	MNT	protein_coding	639.318	3.76243	0.245129	15.3488	3.60957e-53	2.09152e-50
ENSG00000125848	20	14322985	14337614	-	FLRT3	protein_coding	539.409	-5.0432	0.328799	-15.3382	4.24636e-53	2.38594e-50
ENSG00000164284	5	149345430	149354583	+	GRPEL2	protein_coding	968.259	3.03027	0.198534	15.2632	1.34494e-52	7.16143e-50
ENSG00000174173	3	101561868	101566446	+	TRMT10C	protein_coding	643.462	-4.03368	0.26428	-15.2629	1.3518e-52	7.16143e-50
ENSG00000134107	3	4979437	4985323	+	BHLHE40	protein_coding	5899.57	3.3898	0.222819	15.2132	2.88991e-52	1.48847e-49
ENSG00000072310	17	17810399	17837011	-	SREBF1	protein_coding	3768.24	3.26969	0.214973	15.2098	3.0468e-52	1.52686e-49
ENSG00000173812	17	41688885	41692668	+	EIF1	protein_coding	6860.85	2.38133	0.157368	15.1323	9.92414e-52	4.84246e-49
ENSG00000114315	3	194136148	194138732	+	HES1	protein_coding	1667.6	3.03399	0.200643	15.1214	1.17075e-51	5.56616e-49
ENSG00000166579	17	8413131	8490411	+	NDEL1	protein_coding	1393.07	2.07401	0.139014	14.9195	2.46188e-50	1.14121e-47
ENSG00000132002	19	14514769	14529770	-	DNAJB1	protein_coding	10427.5	4.15907	0.27896	14.9092	2.87108e-50	1.29843e-47
ENSG00000180787	17	5078467	5096374	+	ZFP3	protein_coding	320.979	-3.74347	0.253216	-14.7837	1.86591e-49	8.23753e-47
ENSG00000136802	9	128882112	128918039	+	LRRC8A	protein_coding	5049.64	5.09129	0.345294	14.7448	3.32239e-49	1.43265e-46
ENSG00000197841	19	34734155	34745378	+	ZNF181	protein_coding	252.493	-4.11762	0.279832	-14.7146	5.19417e-49	2.18887e-46
ENSG00000243701	3	107220744	107348464	+	DUBR	lncRNA	289.125	-3.30616	0.224784	-14.7082	5.71097e-49	2.35317e-46
ENSG00000249082	5	135038831	135040047	-	C5orf66-AS1	lncRNA	118.555	4.50375	0.309076	14.5717	4.25482e-48	1.71506e-45
ENSG00000007062	4	15963076	16084378	-	PROM1	protein_coding	5572.73	-2.8238	0.194187	-14.5417	6.59724e-48	2.60268e-45
ENSG00000138640	4	88725955	89111398	-	FAM13A	protein_coding	964.373	-2.25543	0.155428	-14.5111	1.0301e-47	3.97921e-45
ENSG00000198730	11	10751246	10801625	+	CTR9	protein_coding	1771.08	-2.50691	0.17327	-14.4682	1.92438e-47	7.282e-45
ENSG00000169155	9	126805006	126838210	+	ZBTB43	protein_coding	774.359	2.53007	0.175192	14.4417	2.82656e-47	1.0482e-44
ENSG00000145675	5	68215756	68301821	+	PIK3R1	protein_coding	408.558	-2.83912	0.196979	-14.4133	4.26517e-47	1.55068e-44
ENSG00000011422	19	43646095	43670547	-	PLAUR	protein_coding	1388.53	4.72857	0.328618	14.3893	6.04362e-47	2.15502e-44
ENSG00000101782	18	23453287	23486603	+	RIOK3	protein_coding	3353.55	2.05709	0.143168	14.3684	8.16608e-47	2.85689e-44
ENSG00000162543	1	20186096	20196050	+	UBXN10	protein_coding	3808.89	-2.32949	0.162304	-14.3526	1.02555e-46	3.52143e-44
ENSG00000161011	5	179806398	179838078	+	SQSTM1	protein_coding	9194.7	2.2304	0.155548	14.3389	1.24968e-46	4.213e-44
ENSG00000165030	9	91409045	91423832	-	NFIL3	protein_coding	361.895	3.17427	0.221565	14.3266	1.4925e-46	4.94178e-44
ENSG00000189060	22	37805093	37807436	+	H1-0	protein_coding	1991.23	3.45954	0.242386	14.2728	3.2324e-46	1.05149e-43
ENSG00000119927	10	112149865	112215377	-	GPAM	protein_coding	325.267	-3.48622	0.244612	-14.252	4.35326e-46	1.39169e-43
ENSG00000189143	7	73799542	73832693	+	CLDN4	protein_coding	7822.47	4.06133	0.286108	14.1951	9.82515e-46	3.08776e-43
ENSG00000175595	16	13920154	13952348	+	ERCC4	protein_coding	295.884	-2.69386	0.189949	-14.182	1.18342e-45	3.65715e-43
ENSG00000108840	17	44076746	44123702	-	HDAC5	protein_coding	833.184	2.43141	0.171516	14.176	1.28918e-45	3.9187e-43
ENSG00000121858	3	172505508	172523475	-	TNFSF10	protein_coding	5547.59	-2.71973	0.192163	-14.1533	1.78275e-45	5.33157e-43
ENSG00000089902	14	102592649	102730561	+	RCOR1	protein_coding	1063.37	2.68393	0.190824	14.0649	6.23824e-45	1.83602e-42
ENSG00000079385	19	42507304	42561234	-	CEACAM1	protein_coding	2850.77	3.72277	0.264874	14.0549	7.19324e-45	2.08402e-42
ENSG00000141458	18	23506184	23586506	-	NPC1	protein_coding	1447.7	3.39998	0.242292	14.0326	9.85191e-45	2.81037e-42
ENSG00000025039	6	89364616	89412273	-	RRAGD	protein_coding	1143.89	2.62282	0.188276	13.9307	4.12251e-44	1.15818e-41
ENSG00000081320	2	196133583	196176503	-	STK17B	protein_coding	1246.34	2.01916	0.144968	13.9283	4.26433e-44	1.18014e-41
ENSG00000163026	2	24029347	24049575	-	WDCP	protein_coding	204.988	-3.59263	0.258045	-13.9225	4.62286e-44	1.26055e-41
ENSG00000178700	3	94047836	94063389	-	DHFR2	protein_coding	186.43	-3.24889	0.233867	-13.8921	7.0779e-44	1.90201e-41
ENSG00000198763	MT	4470	5511	+	MT-ND2	protein_coding	73142	-2.31574	0.16681	-13.8826	8.08106e-44	2.14056e-41
ENSG00000134982	5	112707498	112846239	+	APC	protein_coding	1034.36	-2.2981	0.16562	-13.8758	8.88162e-44	2.31948e-41
ENSG00000125746	19	45606994	45645629	-	EML2	protein_coding	941.912	2.1759	0.157944	13.7764	3.5326e-43	8.9728e-41
ENSG00000274349	9	66856426	66932141	+	ZNF658	protein_coding	159.277	-4.92003	0.357114	-13.7772	3.49474e-43	8.9728e-41
ENSG00000135334	6	87674860	87702233	-	AKIRIN2	protein_coding	660.332	4.167	0.302764	13.7632	4.24414e-43	1.06344e-40
ENSG00000101670	18	49560699	49599185	+	LIPG	protein_coding	215.505	4.94199	0.362593	13.6296	2.67129e-42	6.60415e-40
ENSG00000116717	1	67685201	67688334	+	GADD45A	protein_coding	2281.91	4.21181	0.30968	13.6005	3.97566e-42	9.69957e-40
ENSG00000132259	11	6234765	6244479	+	CNGA4	protein_coding	341.43	-3.38679	0.250062	-13.5438	8.62025e-42	2.0758e-39
ENSG00000163931	3	53224712	53256052	-	TKT	protein_coding	5214.38	2.9085	0.215747	13.4811	2.02153e-41	4.80553e-39
ENSG00000197782	19	40069152	40090938	-	ZNF780A	protein_coding	350.332	-3.63443	0.269632	-13.4792	2.07245e-41	4.86422e-39
ENSG00000269343	19	57819721	57846238	+	ZNF587B	protein_coding	218.981	-3.02734	0.224697	-13.473	2.2551e-41	5.22676e-39
ENSG00000124193	20	43457893	43466046	+	SRSF6	protein_coding	1527.62	-2.04747	0.152236	-13.4493	3.10829e-41	7.11529e-39
ENSG00000174125	4	38790677	38856817	-	TLR1	protein_coding	398.229	-3.74517	0.278975	-13.4247	4.33108e-41	9.79352e-39
ENSG00000198718	14	44962190	45074431	+	TOGARAM1	protein_coding	891.845	-2.11839	0.158481	-13.3668	9.44806e-41	2.11067e-38
ENSG00000198648	2	167954020	168247595	-	STK39	protein_coding	1721.43	2.73802	0.204941	13.36	1.03524e-40	2.28518e-38
ENSG00000075407	10	38094334	38150293	+	ZNF37A	protein_coding	253.4	-3.83144	0.286921	-13.3537	1.12771e-40	2.45999e-38
ENSG00000176387	16	67430652	67437553	+	HSD11B2	protein_coding	244.241	4.50173	0.337799	13.3267	1.61999e-40	3.49278e-38
ENSG00000170412	17	74424851	74451653	+	GPRC5C	protein_coding	1347.55	2.03415	0.153692	13.2353	5.49135e-40	1.17035e-37
ENSG00000150991	12	124911604	124917368	-	UBC	protein_coding	54291	2.24605	0.170402	13.1809	1.13069e-39	2.38241e-37
ENSG00000090612	12	133181409	133214831	+	ZNF268	protein_coding	517.424	-3.92596	0.298088	-13.1705	1.29787e-39	2.70395e-37
ENSG00000125733	19	6737925	6751530	+	TRIP10	protein_coding	2473.4	3.32222	0.252278	13.1689	1.32589e-39	2.73163e-37
ENSG00000131069	20	34872146	34927962	+	ACSS2	protein_coding	2608.13	3.14687	0.239882	13.1184	2.58308e-39	5.26324e-37
ENSG00000103089	16	74712955	74774831	-	FA2H	protein_coding	417.609	4.39849	0.335745	13.1007	3.26239e-39	6.57514e-37
ENSG00000160570	19	42198598	42220140	-	DEDD2	protein_coding	770.227	3.14757	0.241157	13.052	6.19249e-39	1.23464e-36
ENSG00000120784	19	37613749	37692337	-	ZFP30	protein_coding	268.556	-3.0207	0.232048	-13.0176	9.72355e-39	1.91802e-36
ENSG00000178295	2	17753858	17788946	+	GEN1	protein_coding	360.494	-4.05975	0.312364	-12.9968	1.27512e-38	2.48877e-36
ENSG00000119986	10	97677424	97687241	-	AVPI1	protein_coding	1253.81	2.81983	0.217088	12.9893	1.40642e-38	2.71645e-36
ENSG00000155850	5	149960758	149993455	+	SLC26A2	protein_coding	360.025	-3.11825	0.240285	-12.9773	1.64611e-38	3.14661e-36
ENSG00000124882	4	74365145	74388749	+	EREG	protein_coding	769.586	4.97694	0.383891	12.9645	1.94572e-38	3.68139e-36
ENSG00000104687	8	30678066	30727846	-	GSR	protein_coding	2230.12	2.83612	0.219014	12.9495	2.36392e-38	4.42745e-36
ENSG00000080561	X	107825755	107927193	+	MID2	protein_coding	444.974	2.9236	0.22612	12.9294	3.0714e-38	5.69498e-36
ENSG00000128000	19	40028260	40056231	-	ZNF780B	protein_coding	381.147	-3.79402	0.295169	-12.8537	8.19485e-38	1.50444e-35
ENSG00000151023	10	24981979	25062279	-	ENKUR	protein_coding	2935.04	-2.12425	0.16649	-12.7591	2.77535e-37	5.04514e-35
ENSG00000103494	16	53598153	53703938	-	RPGRIP1L	protein_coding	1525.53	-2.07155	0.162431	-12.7534	2.98348e-37	5.37085e-35
ENSG00000119636	14	74019349	74082863	+	BBOF1	protein_coding	1780.17	-2.39236	0.18822	-12.7104	5.17552e-37	9.22736e-35
ENSG00000136870	9	101398873	101410660	+	ZNF189	protein_coding	414.905	-3.30578	0.260279	-12.7009	5.84444e-37	1.03207e-34
ENSG00000180758	1	9100305	9129102	-	GPR157	protein_coding	576.807	3.55932	0.280523	12.6882	6.87731e-37	1.20301e-34
ENSG00000164086	3	52048919	52056571	-	DUSP7	protein_coding	1192.91	3.91885	0.308898	12.6865	7.02206e-37	1.21685e-34
ENSG00000186329	3	171843349	171938715	+	TMEM212	protein_coding	549.169	-2.97741	0.235562	-12.6396	1.27715e-36	2.19267e-34
ENSG00000136925	9	97600080	97633368	-	TSTD2	protein_coding	237.843	-2.67866	0.21203	-12.6334	1.38124e-36	2.34964e-34
ENSG00000105327	19	47220822	47232766	-	BBC3	protein_coding	410.069	4.5452	0.362105	12.5521	3.86878e-36	6.52135e-34
ENSG00000186594	17	1711493	1717174	-	MIR22HG	lncRNA	338.566	-2.92268	0.232915	-12.5482	4.06416e-36	6.78898e-34
ENSG00000183696	7	48088628	48108736	+	UPP1	protein_coding	1483.04	4.46137	0.356971	12.4979	7.66818e-36	1.2695e-33
ENSG00000168906	2	85539168	85545281	+	MAT2A	protein_coding	2448.19	-2.79577	0.223743	-12.4954	7.90619e-36	1.29731e-33
ENSG00000118965	2	19910260	19990131	-	WDR35	protein_coding	1199.81	-2.47239	0.198047	-12.4838	9.14843e-36	1.48798e-33
ENSG00000092871	17	35005990	35089319	-	RFFL	protein_coding	264.534	2.67916	0.214716	12.4777	9.88498e-36	1.5938e-33
ENSG00000066027	1	212285410	212361853	+	PPP2R5A	protein_coding	1134.95	1.89824	0.152308	12.4632	1.18497e-35	1.89412e-33
ENSG00000085276	3	169083499	169663775	-	MECOM	protein_coding	2283.63	-2.64627	0.212421	-12.4577	1.2701e-35	2.01283e-33
ENSG00000135845	1	172370189	172444086	-	PIGC	protein_coding	376.906	-2.30542	0.186068	-12.3902	2.95209e-35	4.63878e-33
ENSG00000188227	19	37506939	37548762	+	ZNF793	protein_coding	213.066	-2.56579	0.207716	-12.3524	4.72942e-35	7.36915e-33
ENSG00000087074	19	48872421	48876058	+	PPP1R15A	protein_coding	2721.45	3.45746	0.28039	12.3309	6.1748e-35	9.5411e-33
ENSG00000152763	1	66812885	66924856	-	WDR78	protein_coding	2719.58	-2.03069	0.164694	-12.33	6.24093e-35	9.56359e-33
ENSG00000099219	9	5765076	5833117	-	ERMP1	protein_coding	3980.94	1.70321	0.138282	12.317	7.33925e-35	1.11545e-32
ENSG00000185875	10	25016612	25026664	+	THNSL1	protein_coding	298.074	-3.10303	0.252598	-12.2844	1.09815e-34	1.65544e-32
ENSG00000198888	MT	3307	4262	+	MT-ND1	protein_coding	22110.8	-3.10148	0.252733	-12.2718	1.28445e-34	1.92066e-32
ENSG00000114491	3	124730433	124749273	+	UMPS	protein_coding	530.835	-2.97732	0.24302	-12.2513	1.65268e-34	2.45152e-32
ENSG00000178163	4	10439880	10457426	-	ZNF518B	protein_coding	496.508	-2.42041	0.19767	-12.2447	1.79348e-34	2.63927e-32
ENSG00000113070	5	140332843	140346603	-	HBEGF	protein_coding	946.434	4.04648	0.330652	12.2379	1.95065e-34	2.84795e-32
ENSG00000188483	9	129175552	129178261	-	IER5L	protein_coding	903.643	3.41592	0.279295	12.2305	2.13627e-34	3.09459e-32
ENSG00000258791	14	55781132	55796731	-	LINC00520	lncRNA	92.8466	6.48693	0.531113	12.2138	2.62235e-34	3.76928e-32
ENSG00000176454	15	34358633	34367196	-	LPCAT4	protein_coding	1488.82	2.63358	0.216198	12.1813	3.9082e-34	5.57429e-32
ENSG00000069399	19	44747705	44760044	+	BCL3	protein_coding	617.027	2.50547	0.205849	12.1714	4.41365e-34	6.24717e-32
ENSG00000206199	3	149761100	149968385	-	ANKUB1	protein_coding	1283.88	-2.68576	0.221853	-12.106	9.81386e-34	1.37855e-31
ENSG00000123836	1	207034366	207081024	+	PFKFB2	protein_coding	876.484	1.746	0.144337	12.0967	1.09941e-33	1.53273e-31
ENSG00000171223	19	12791486	12793315	+	JUNB	protein_coding	2458.55	4.3295	0.358197	12.0869	1.23815e-33	1.71327e-31
ENSG00000123358	12	52022832	52059507	+	NR4A1	protein_coding	197.289	5.17042	0.42789	12.0835	1.29083e-33	1.77293e-31
ENSG00000134258	1	117143587	117210960	-	VTCN1	protein_coding	3966.24	-2.84175	0.235694	-12.0569	1.78344e-33	2.41376e-31
ENSG00000186496	18	35366694	35377337	-	ZNF396	protein_coding	220.688	-3.14426	0.260785	-12.0569	1.78343e-33	2.41376e-31
ENSG00000148339	9	128068201	128109245	+	SLC25A25	protein_coding	318.516	3.60511	0.300137	12.0115	3.09015e-33	4.15199e-31
ENSG00000100664	14	103333544	103345025	+	EIF5	protein_coding	2842.64	-1.87696	0.156737	-11.9752	4.79239e-33	6.39284e-31
ENSG00000117507	1	171137740	171161568	+	FMO6P	transcribed_unitary_pseudogene	246.6	-4.93198	0.412212	-11.9647	5.4422e-33	7.2078e-31
ENSG00000204160	1	26826688	26857604	+	ZDHHC18	protein_coding	464.662	2.534	0.211976	11.9542	6.17474e-33	8.12001e-31
ENSG00000106211	7	76302673	76304295	+	HSPB1	protein_coding	18497.7	2.84694	0.238209	11.9514	6.3822e-33	8.33371e-31
ENSG00000130522	19	18279694	18281622	-	JUND	protein_coding	1435.72	3.37044	0.282099	11.9477	6.67364e-33	8.65333e-31
ENSG00000112511	6	33410399	33416453	+	PHF1	protein_coding	598.834	2.94917	0.24714	11.9332	7.94537e-33	1.02308e-30
ENSG00000155749	2	201288271	201357398	-	FLACC1	protein_coding	331.425	-2.5651	0.214996	-11.9309	8.17033e-33	1.04479e-30
ENSG00000100815	14	91965991	92040896	-	TRIP11	protein_coding	1829.46	-1.83065	0.153594	-11.9188	9.45086e-33	1.20026e-30
ENSG00000136935	9	124878275	124948492	-	GOLGA1	protein_coding	555.412	-1.56787	0.132035	-11.8747	1.60274e-32	2.02163e-30
ENSG00000130935	17	67717931	67744531	+	NOL11	protein_coding	974.371	-2.77997	0.234946	-11.8324	2.65584e-32	3.32734e-30
ENSG00000196693	10	42574185	42638570	-	ZNF33B	protein_coding	620.294	-2.44051	0.206411	-11.8236	2.94946e-32	3.6704e-30
ENSG00000179094	17	8140472	8156506	-	PER1	protein_coding	925.293	3.37503	0.286232	11.7912	4.33134e-32	5.35412e-30
ENSG00000099260	1	99646113	99694541	+	PALMD	protein_coding	980.895	-2.27008	0.192629	-11.7848	4.67705e-32	5.74317e-30
ENSG00000059728	2	69897688	69942945	+	MXD1	protein_coding	2023.19	4.29148	0.364503	11.7735	5.34403e-32	6.51902e-30
ENSG00000155090	8	102648784	102655725	-	KLF10	protein_coding	2095.5	-2.53375	0.215487	-11.7582	6.40575e-32	7.7631e-30
ENSG00000141040	17	16546954	16569204	-	ZNF287	protein_coding	141.831	-3.40013	0.289334	-11.7516	6.93218e-32	8.34653e-30
ENSG00000242474	7	135853	149527	-	AC093627.5	lncRNA	92.3447	-5.24813	0.446818	-11.7456	7.44243e-32	8.90306e-30
ENSG00000183323	5	69280175	69332809	-	CCDC125	protein_coding	1520.87	-1.73804	0.147985	-11.7447	7.51554e-32	8.93289e-30
ENSG00000093167	3	37052626	37183689	-	LRRFIP2	protein_coding	1523.39	1.79809	0.153148	11.7409	7.8682e-32	9.29249e-30
ENSG00000127947	7	77537295	77640069	+	PTPN12	protein_coding	1659.65	2.539	0.216567	11.7239	9.61921e-32	1.12886e-29
ENSG00000231074	6	30286690	30327382	-	HCG18	lncRNA	405.755	-3.09679	0.26426	-11.7187	1.02176e-31	1.19154e-29
ENSG00000167984	16	3539033	3577403	-	NLRC3	protein_coding	254.381	-2.68319	0.229336	-11.6998	1.27698e-31	1.47986e-29
ENSG00000087086	19	48965309	48966879	+	FTL	protein_coding	32960.6	1.94655	0.166642	11.681	1.59348e-31	1.83518e-29
ENSG00000072864	16	15643267	15726353	+	NDE1	protein_coding	306.493	2.28547	0.195905	11.6662	1.89629e-31	2.17043e-29
ENSG00000171295	19	11814273	11835216	+	ZNF440	protein_coding	1772.33	-1.83844	0.157595	-11.6656	1.91052e-31	2.1733e-29
ENSG00000148841	10	104309698	104338465	-	ITPRIP	protein_coding	755.314	4.65114	0.398751	11.6643	1.9405e-31	2.19395e-29
ENSG00000185022	22	38200767	38216507	+	MAFF	protein_coding	579.744	4.84969	0.416074	11.6558	2.14317e-31	2.4084e-29
ENSG00000137648	11	118077012	118121890	+	TMPRSS4	protein_coding	15316.2	1.83698	0.157622	11.6543	2.18122e-31	2.4364e-29
ENSG00000169490	8	38988808	38996824	-	TM2D2	protein_coding	704.514	-2.27233	0.195013	-11.6522	2.23684e-31	2.48356e-29
ENSG00000130513	19	18374731	18389176	+	GDF15	protein_coding	8396.6	6.63193	0.572015	11.594	4.4208e-31	4.8792e-29
ENSG00000005001	16	2852730	2858170	-	PRSS22	protein_coding	5310.01	3.24025	0.279749	11.5827	5.04351e-31	5.53354e-29
ENSG00000000457	1	169849631	169894267	-	SCYL3	protein_coding	482.573	-2.31344	0.200439	-11.5418	8.11643e-31	8.85264e-29
ENSG00000062370	19	44326555	44367217	-	ZNF112	protein_coding	173.144	-3.00958	0.261025	-11.5299	9.32758e-31	1.01142e-28
ENSG00000104140	15	40872214	40874234	-	RHOV	protein_coding	1181.91	3.32521	0.288548	11.5239	9.99538e-31	1.07753e-28
ENSG00000104824	19	38836388	38852347	-	HNRNPL	protein_coding	1163.03	1.78035	0.155003	11.4859	1.55342e-30	1.66494e-28
ENSG00000129317	12	43718993	43758817	-	PUS7L	protein_coding	454.133	-2.3098	0.201328	-11.4728	1.80647e-30	1.92504e-28
ENSG00000124160	20	46060991	46089962	-	NCOA5	protein_coding	175.518	-5.07517	0.44279	-11.4618	2.05181e-30	2.17398e-28
ENSG00000172216	20	50190830	50192668	+	CEBPB	protein_coding	1418.62	4.47379	0.390549	11.4551	2.2165e-30	2.33513e-28
ENSG00000112033	6	35342558	35428191	+	PPARD	protein_coding	421.108	2.53468	0.221983	11.4183	3.38637e-30	3.54746e-28
ENSG00000157227	14	22836560	22849027	+	MMP14	protein_coding	6586.59	2.75294	0.24149	11.3998	4.18996e-30	4.36462e-28
ENSG00000130304	19	17468769	17506168	+	SLC27A1	protein_coding	540.21	2.20754	0.193756	11.3934	4.51239e-30	4.67423e-28
ENSG00000116350	1	29147743	29181900	-	SRSF4	protein_coding	1670.96	1.28792	0.113119	11.3856	4.93303e-30	5.08157e-28
ENSG00000142627	1	16124337	16156069	-	EPHA2	protein_coding	4674.96	2.84095	0.2497	11.3775	5.41416e-30	5.54637e-28
ENSG00000176593	19	58002061	58011232	+	AC008969.1	lncRNA	163.842	-3.78261	0.332612	-11.3724	5.73681e-30	5.84462e-28
ENSG00000132434	7	55365448	55433742	+	LANCL2	protein_coding	284.361	-2.32062	0.204266	-11.3608	6.55251e-30	6.63916e-28
ENSG00000256771	19	19865882	19894674	+	ZNF253	protein_coding	176.848	-3.15472	0.277882	-11.3527	7.18675e-30	7.24221e-28
ENSG00000116285	1	8004404	8026309	-	ERRFI1	protein_coding	1328.12	2.2146	0.195173	11.3468	7.69007e-30	7.70752e-28
ENSG00000134278	18	12446512	12658134	-	SPIRE1	protein_coding	874.639	1.89094	0.166737	11.3409	8.23187e-30	8.2062e-28
ENSG00000198355	22	49960768	49964072	+	PIM3	protein_coding	2013.24	3.86992	0.341573	11.3297	9.35369e-30	9.27466e-28
ENSG00000170275	3	33114014	33147773	+	CRTAP	protein_coding	993.275	2.5306	0.223711	11.3119	1.14535e-29	1.12963e-27
ENSG00000122861	10	73909177	73917496	+	PLAU	protein_coding	4308.8	5.6357	0.498756	11.2995	1.31953e-29	1.29454e-27
ENSG00000198938	MT	9207	9990	+	MT-CO3	protein_coding	160156	-2.23229	0.197601	-11.297	1.35832e-29	1.32558e-27
ENSG00000176601	2	134964485	135047468	-	MAP3K19	protein_coding	2667.66	-1.90202	0.168399	-11.2948	1.3929e-29	1.35221e-27
ENSG00000166949	15	67063763	67195169	+	SMAD3	protein_coding	2934.34	2.06947	0.183305	11.2897	1.47494e-29	1.4244e-27
ENSG00000130164	19	11089462	11133820	+	LDLR	protein_coding	2796.82	3.64045	0.322605	11.2845	1.5648e-29	1.50335e-27
ENSG00000013503	12	106357748	106510198	+	POLR3B	protein_coding	297.944	-2.52577	0.224061	-11.2727	1.79026e-29	1.71108e-27
ENSG00000148926	11	10305073	10307397	+	ADM	protein_coding	1036.63	4.54972	0.40379	11.2675	1.89802e-29	1.80477e-27
ENSG00000250479	22	23765834	23768443	-	CHCHD10	protein_coding	509.979	3.57949	0.318312	11.2452	2.44508e-29	2.3131e-27
ENSG00000125863	20	10401009	10434222	-	MKKS	protein_coding	311.974	-2.61801	0.232984	-11.2369	2.68695e-29	2.52901e-27
ENSG00000115339	2	165747588	165794659	-	GALNT3	protein_coding	4073.76	1.37469	0.122408	11.2304	2.89086e-29	2.69359e-27
ENSG00000217527	6	53336943	53337346	-	RPS16P5	transcribed_processed_pseudogene	51.2428	5.71086	0.508507	11.2306	2.88372e-29	2.69359e-27
ENSG00000120051	10	104353833	104455102	+	CFAP58	protein_coding	566.576	-2.21691	0.197415	-11.2297	2.91587e-29	2.7033e-27
ENSG00000139537	12	48904110	48931840	+	CCDC65	protein_coding	1877.92	-2.15206	0.191701	-11.2262	3.03345e-29	2.79832e-27
ENSG00000166471	11	9280654	9314636	-	TMEM41B	protein_coding	970.528	1.77801	0.158391	11.2255	3.05708e-29	2.80616e-27
ENSG00000152518	2	43222402	43226606	-	ZFP36L2	protein_coding	883.505	3.25235	0.290405	11.1993	4.10779e-29	3.75205e-27
ENSG00000188659	15	82262810	82284930	+	SAXO2	protein_coding	2470.54	-2.29961	0.205571	-11.1865	4.75014e-29	4.3175e-27
ENSG00000110442	11	36269284	36289449	-	COMMD9	protein_coding	513.96	-2.35118	0.21034	-11.178	5.22758e-29	4.72829e-27
ENSG00000177191	19	41425359	41428730	-	B3GNT8	protein_coding	196.32	4.66128	0.417024	11.1775	5.25545e-29	4.73042e-27
ENSG00000052344	16	31131433	31135727	-	PRSS8	protein_coding	2608	2.90651	0.260199	11.1703	5.6958e-29	5.102e-27
ENSG00000155636	2	178112424	178139011	+	RBM45	protein_coding	290.901	-2.54108	0.227516	-11.1688	5.79353e-29	5.1646e-27
ENSG00000272888	15	92819540	92899701	+	LINC01578	lncRNA	770.059	1.91354	0.1716	11.1511	7.07151e-29	6.27368e-27
ENSG00000172123	17	35411060	35433283	-	SLFN12	protein_coding	318.085	-3.77916	0.339048	-11.1464	7.45776e-29	6.58485e-27
ENSG00000138434	2	181891730	181930738	+	ITPRID2	protein_coding	3200.36	1.36755	0.122756	11.1404	7.97731e-29	7.0102e-27
ENSG00000132109	11	4384897	4393702	-	TRIM21	protein_coding	454.4	-3.2842	0.295137	-11.1277	9.19887e-29	8.04554e-27
ENSG00000064703	1	111755245	111768000	+	DDX20	protein_coding	404.275	-2.51477	0.226266	-11.1143	1.06942e-28	9.30434e-27
ENSG00000174307	1	201464278	201469237	-	PHLDA3	protein_coding	1526.22	3.15068	0.28349	11.1139	1.07385e-28	9.30434e-27
ENSG00000148426	10	11823339	11872277	+	PROSER2	protein_coding	379.182	3.44211	0.310389	11.0897	1.40809e-28	1.21437e-26
ENSG00000163946	3	56620133	56683237	-	TASOR	protein_coding	1347.3	-1.83617	0.165678	-11.0827	1.52175e-28	1.30631e-26
ENSG00000221886	5	160393148	160400054	-	ZBED8	protein_coding	133.19	-2.83534	0.25587	-11.0812	1.54836e-28	1.32302e-26
ENSG00000172819	12	53210567	53232980	-	RARG	protein_coding	959.855	2.16846	0.195717	11.0795	1.57682e-28	1.34116e-26
ENSG00000196458	12	132918306	132956306	-	ZNF605	protein_coding	557.398	-3.2231	0.291057	-11.0738	1.681e-28	1.42325e-26
ENSG00000101138	20	56392371	56406362	+	CSTF1	protein_coding	608.997	-2.18502	0.197673	-11.0537	2.10335e-28	1.77274e-26
ENSG00000250033	4	138057464	138178177	+	SLC7A11-AS1	lncRNA	86.79	5.81012	0.52576	11.0509	2.17062e-28	1.82116e-26
ENSG00000198919	3	108589705	108694840	+	DZIP3	protein_coding	4025.3	-1.80717	0.163579	-11.0477	2.25018e-28	1.87941e-26
ENSG00000161642	12	54369133	54391298	-	ZNF385A	protein_coding	788.193	2.69875	0.244367	11.0439	2.34747e-28	1.95187e-26
ENSG00000110628	11	2899721	2925246	+	SLC22A18	protein_coding	386.024	2.64131	0.239185	11.043	2.37102e-28	1.96266e-26
ENSG00000224616	1	100251528	100266179	-	RTCA-AS1	lncRNA	258.249	-3.14042	0.284434	-11.041	2.42419e-28	1.99775e-26
ENSG00000153310	8	129839593	130017129	-	FAM49B	protein_coding	1104.5	1.56553	0.141807	11.0398	2.45532e-28	2.01445e-26
ENSG00000224479	3	63741827	63827445	-	AC104162.1	transcribed_unitary_pseudogene	126.954	-3.71586	0.336652	-11.0377	2.51446e-28	2.05388e-26
ENSG00000162231	11	62792123	62806302	-	NXF1	protein_coding	928.601	-2.31652	0.210242	-11.0184	3.11698e-28	2.53487e-26
ENSG00000188171	19	20619939	20661596	-	ZNF626	protein_coding	192.461	-3.40042	0.308718	-11.0147	3.247e-28	2.62908e-26
ENSG00000245680	19	37181579	37218153	-	ZNF585B	protein_coding	266.224	-2.0466	0.186121	-10.9961	3.99089e-28	3.21735e-26
ENSG00000184897	3	129314771	129316286	-	H1-10	protein_coding	697.667	3.59799	0.327519	10.9856	4.48428e-28	3.59946e-26
ENSG00000126822	14	64704102	64750249	+	PLEKHG3	protein_coding	920.658	2.24108	0.204106	10.98	4.7712e-28	3.81326e-26
ENSG00000261324	12	14762504	14767931	-	AC010168.2	lncRNA	122.219	-5.7585	0.524812	-10.9725	5.18173e-28	4.12359e-26
ENSG00000134531	12	13196723	13219941	+	EMP1	protein_coding	2639.7	3.07895	0.280722	10.968	5.44804e-28	4.31699e-26
ENSG00000118816	4	77047155	77075989	-	CCNI	protein_coding	3879.4	2.38903	0.218255	10.946	6.9421e-28	5.47747e-26
ENSG00000114204	3	167441789	167479004	-	SERPINI2	protein_coding	280.263	-3.76249	0.344165	-10.9322	8.08507e-28	6.35226e-26
ENSG00000057657	6	105993463	106109939	+	PRDM1	protein_coding	288.18	3.5763	0.327333	10.9256	8.69847e-28	6.77677e-26
ENSG00000144908	3	126103562	126197994	-	ALDH1L1	protein_coding	446.139	2.18949	0.200396	10.9258	8.67343e-28	6.77677e-26
ENSG00000118689	6	108559835	108684774	+	FOXO3	protein_coding	1300.11	2.9951	0.274278	10.92	9.25326e-28	7.17883e-26
ENSG00000173334	8	125430358	125438403	+	TRIB1	protein_coding	494.456	2.81876	0.258156	10.9188	9.37196e-28	7.24062e-26
ENSG00000169231	1	155195588	155209051	-	THBS3	protein_coding	405.412	-2.3419	0.214537	-10.9161	9.65545e-28	7.42869e-26
ENSG00000196981	3	122411846	122416062	-	WDR5B	protein_coding	468.091	-2.78823	0.255614	-10.908	1.05592e-27	8.09042e-26
ENSG00000176714	2	27625639	27629012	-	CCDC121	protein_coding	220.476	-2.95707	0.271402	-10.8955	1.21095e-27	9.16685e-26
ENSG00000177606	1	58780791	58784047	-	JUN	protein_coding	1926.68	3.84262	0.352659	10.8961	1.20241e-27	9.16685e-26
ENSG00000275835	15	22983192	23039572	-	TUBGCP5	protein_coding	342.464	-2.07557	0.190498	-10.8955	1.21124e-27	9.16685e-26
ENSG00000158195	1	27404230	27490167	-	WASF2	protein_coding	2286.84	2.74142	0.251632	10.8945	1.2239e-27	9.22505e-26
ENSG00000119953	10	110290730	110304938	-	SMNDC1	protein_coding	560.012	1.8765	0.172438	10.8821	1.40231e-27	1.0527e-25
ENSG00000125630	2	112541915	112579818	+	POLR1B	protein_coding	564.774	-2.20139	0.202334	-10.88	1.43542e-27	1.0732e-25
ENSG00000155252	10	97640686	97676434	+	PI4K2A	protein_coding	924.564	2.80734	0.258165	10.8742	1.52985e-27	1.13922e-25
ENSG00000104549	8	124998497	125022283	+	SQLE	protein_coding	2929.79	2.73242	0.251759	10.8533	1.92336e-27	1.42652e-25
ENSG00000213445	11	65638101	65650918	+	SIPA1	protein_coding	298.787	3.55849	0.327917	10.8518	1.95559e-27	1.44464e-25
ENSG00000170873	8	124550790	124728429	-	MTSS1	protein_coding	621.042	2.01353	0.185554	10.8514	1.96342e-27	1.44467e-25
ENSG00000102879	16	30182827	30189076	+	CORO1A	protein_coding	168.64	4.39376	0.40545	10.8368	2.305e-27	1.68701e-25
ENSG00000197063	17	81918270	81927735	-	MAFG	protein_coding	562.033	2.67442	0.246797	10.8365	2.31097e-27	1.68701e-25
ENSG00000165637	10	75210154	75231448	+	VDAC2	protein_coding	4205.99	1.53279	0.141598	10.8249	2.62295e-27	1.90724e-25
ENSG00000130703	20	62231922	62296213	+	OSBPL2	protein_coding	1311.53	1.79594	0.165976	10.8205	2.75256e-27	1.99367e-25
ENSG00000133606	7	140453033	140479536	-	MKRN1	protein_coding	2632.82	1.31903	0.122021	10.8099	3.09116e-27	2.23021e-25
ENSG00000124145	20	45325288	45348424	-	SDC4	protein_coding	9850.68	1.65882	0.153641	10.7967	3.56912e-27	2.56506e-25
ENSG00000135750	1	233614106	233672514	+	KCNK1	protein_coding	1115.23	2.03318	0.188474	10.7876	3.94063e-27	2.82113e-25
ENSG00000188895	17	40121971	40136917	+	MSL1	protein_coding	1596.94	1.69921	0.157568	10.784	4.09606e-27	2.92112e-25
ENSG00000135926	2	218274197	218292586	-	TMBIM1	protein_coding	4418.59	3.8029	0.352744	10.7809	4.23685e-27	3.00995e-25
ENSG00000150776	11	112074086	112085150	+	NKAPD1	protein_coding	596.381	-2.19499	0.203607	-10.7805	4.25446e-27	3.01092e-25
ENSG00000165923	11	47659591	47715389	-	AGBL2	protein_coding	1033.75	-1.77279	0.16448	-10.7781	4.36657e-27	3.07851e-25
ENSG00000107242	9	68705240	69009176	+	PIP5K1B	protein_coding	313.405	2.30869	0.214329	10.7717	4.68364e-27	3.28955e-25
ENSG00000132613	16	70661204	70686053	-	MTSS2	protein_coding	625.865	2.26578	0.210439	10.7669	4.93225e-27	3.45108e-25
ENSG00000049130	12	88492793	88580851	-	KITLG	protein_coding	1634	-3.10396	0.288475	-10.7599	5.32516e-27	3.712e-25
ENSG00000225630	1	629640	630683	+	MTND2P28	unprocessed_pseudogene	126.579	-2.68024	0.249413	-10.7462	6.17561e-27	4.28869e-25
ENSG00000128309	22	37019635	37029822	+	MPST	protein_coding	499.369	2.69763	0.251206	10.7387	6.69469e-27	4.63183e-25
ENSG00000100461	14	22893204	22919182	-	RBM23	protein_coding	1123.41	-1.39671	0.130112	-10.7347	6.99506e-27	4.82165e-25
ENSG00000164815	7	104126341	104208047	-	ORC5	protein_coding	389.297	-2.23688	0.208871	-10.7094	9.19624e-27	6.31543e-25
ENSG00000137878	15	57591908	57714745	+	GCOM1	protein_coding	188.77	3.5868	0.335074	10.7045	9.6948e-27	6.63324e-25
ENSG00000163389	3	119468963	119494708	+	POGLUT1	protein_coding	341.529	-3.41187	0.319202	-10.6887	1.14915e-26	7.83366e-25
ENSG00000125089	4	8182072	8241803	+	SH3TC1	protein_coding	273.66	3.39642	0.317944	10.6825	1.22982e-26	8.35287e-25
ENSG00000179387	4	140524168	140553770	+	ELMOD2	protein_coding	1127.42	-1.75876	0.164651	-10.6818	1.23878e-26	8.38304e-25
ENSG00000127989	7	91692008	91880702	-	MTERF1	protein_coding	291.985	-2.74859	0.257381	-10.6791	1.27516e-26	8.59784e-25
ENSG00000164627	6	39329990	39725408	-	KIF6	protein_coding	392.476	-1.86768	0.174914	-10.6778	1.29366e-26	8.69095e-25
ENSG00000198464	19	52297169	52325922	+	ZNF480	protein_coding	352.828	-2.63566	0.246866	-10.6765	1.31192e-26	8.78179e-25
ENSG00000173914	11	66664998	66677887	-	RBM4B	protein_coding	378.707	-2.6221	0.245647	-10.6743	1.34331e-26	8.95961e-25
ENSG00000070495	17	76712832	76726799	-	JMJD6	protein_coding	371.183	2.11345	0.198381	10.6535	1.67988e-26	1.11643e-24
ENSG00000122484	1	92299059	92402056	+	RPAP2	protein_coding	445.694	-2.26635	0.213041	-10.6381	1.98142e-26	1.31212e-24
ENSG00000032742	13	20567069	20691437	+	IFT88	protein_coding	1301.04	-1.68452	0.158534	-10.6256	2.26638e-26	1.49549e-24
ENSG00000169018	15	68277745	68295862	+	FEM1B	protein_coding	1700.52	1.28356	0.120808	10.6248	2.28451e-26	1.50211e-24
ENSG00000181467	3	153162226	153170627	+	RAP2B	protein_coding	876.973	2.95987	0.278635	10.6228	2.3355e-26	1.53021e-24
ENSG00000184292	1	58575433	58577252	-	TACSTD2	protein_coding	25223.6	2.75129	0.259088	10.6192	2.42749e-26	1.58488e-24
ENSG00000165527	14	49893082	49897054	+	ARF6	protein_coding	2529.51	2.64621	0.249295	10.6148	2.54405e-26	1.65515e-24
ENSG00000116560	1	35176378	35193145	-	SFPQ	protein_coding	2364.22	-1.30884	0.123325	-10.6129	2.59573e-26	1.677e-24
ENSG00000229124	10	17214239	17229985	-	VIM-AS1	lncRNA	127.639	-3.18403	0.300008	-10.6131	2.58943e-26	1.677e-24
ENSG00000273760	10	47970043	47973496	-	AC245041.1	lncRNA	148.403	-4.72943	0.445722	-10.6107	2.65707e-26	1.71067e-24
ENSG00000113742	5	173888349	173961980	+	CPEB4	protein_coding	1694.52	1.41811	0.134191	10.5678	4.20138e-26	2.69557e-24
ENSG00000131848	19	56219670	56368383	-	ZSCAN5A	protein_coding	149.624	-3.33512	0.315735	-10.563	4.42211e-26	2.82741e-24
ENSG00000111834	6	116616479	116632985	+	RSPH4A	protein_coding	2638.74	-1.78144	0.168687	-10.5606	4.53527e-26	2.88979e-24
ENSG00000165233	9	93096217	93113283	+	CARD19	protein_coding	387.669	2.2611	0.214127	10.5596	4.5865e-26	2.91242e-24
ENSG00000164252	5	77029251	77065234	+	AGGF1	protein_coding	232.782	-2.33226	0.220882	-10.5589	4.62115e-26	2.92442e-24
ENSG00000135775	1	230642481	230693982	+	COG2	protein_coding	690.897	-2.11596	0.200432	-10.557	4.71579e-26	2.97416e-24
ENSG00000134108	3	5122245	5180912	+	ARL8B	protein_coding	2614.5	1.60532	0.152289	10.5412	5.57561e-26	3.50451e-24
ENSG00000181322	3	138261437	138329886	-	NME9	protein_coding	358.799	-2.03362	0.193179	-10.5272	6.47492e-26	4.05601e-24
ENSG00000106089	7	73699206	73719672	-	STX1A	protein_coding	210.54	3.23125	0.307887	10.4949	9.11811e-26	5.69252e-24
ENSG00000197057	4	36281622	36345756	+	DTHD1	protein_coding	3390.66	-2.35885	0.224777	-10.4942	9.18447e-26	5.71471e-24
ENSG00000167384	19	44474428	44500524	-	ZNF180	protein_coding	150.397	-3.46218	0.33037	-10.4797	1.07077e-25	6.64018e-24
ENSG00000126773	14	60091911	60169133	+	PCNX4	protein_coding	1689.73	-1.84842	0.176444	-10.476	1.11345e-25	6.88188e-24
ENSG00000112759	6	44219553	44234142	+	SLC29A1	protein_coding	277.478	3.1542	0.301121	10.4749	1.12693e-25	6.94204e-24
ENSG00000146112	6	30676389	30687895	-	PPP1R18	protein_coding	401.011	3.29144	0.314299	10.4723	1.15791e-25	7.10929e-24
ENSG00000181649	11	2928273	2929420	-	PHLDA2	protein_coding	1263.92	6.19104	0.591378	10.4688	1.2012e-25	7.35072e-24
ENSG00000144959	3	172630249	172711218	-	NCEH1	protein_coding	695.728	-1.87874	0.179699	-10.4549	1.39172e-25	8.48859e-24
ENSG00000115423	2	84516455	84819589	+	DNAH6	protein_coding	4264.04	-2.04234	0.195556	-10.4437	1.56537e-25	9.51641e-24
ENSG00000168209	10	72273924	72276036	+	DDIT4	protein_coding	2488.56	3.63392	0.348011	10.442	1.59461e-25	9.66248e-24
ENSG00000160691	1	154962298	154974395	-	SHC1	protein_coding	1644.16	2.6433	0.253173	10.4407	1.61689e-25	9.76558e-24
ENSG00000131043	20	36236459	36270918	+	AAR2	protein_coding	605.205	-1.76604	0.169532	-10.4172	2.07038e-25	1.2464e-23
ENSG00000135315	6	84124241	84227643	-	CEP162	protein_coding	932.047	-2.23945	0.215039	-10.4141	2.13713e-25	1.28242e-23
ENSG00000196922	8	144973589	145002895	-	ZNF252P	transcribed_unprocessed_pseudogene	394.813	-2.14049	0.205691	-10.4063	2.32008e-25	1.38771e-23
ENSG00000099860	19	2476122	2478259	+	GADD45B	protein_coding	1051.84	3.33354	0.320404	10.4042	2.37248e-25	1.41449e-23
ENSG00000167723	17	3510502	3557995	-	TRPV3	protein_coding	119.211	3.96271	0.380888	10.4039	2.3805e-25	1.41472e-23
ENSG00000112406	6	139135080	139180802	+	HECA	protein_coding	464.13	2.26335	0.217642	10.3994	2.4947e-25	1.47785e-23
ENSG00000172818	11	65787063	65797214	+	OVOL1	protein_coding	318.564	3.98813	0.3838	10.3912	2.72014e-25	1.60627e-23
ENSG00000187446	15	41230839	41281887	+	CHP1	protein_coding	2342.47	2.61981	0.252224	10.3868	2.84663e-25	1.67563e-23
ENSG00000175606	8	73972437	73982783	+	TMEM70	protein_coding	534.792	-2.52792	0.243575	-10.3784	3.10941e-25	1.82452e-23
ENSG00000167858	17	6789133	6831761	-	TEKT1	protein_coding	3918.9	-2.11739	0.204131	-10.3727	3.30027e-25	1.93039e-23
ENSG00000142623	1	17205128	17246007	+	PADI1	protein_coding	3439.02	3.31151	0.319313	10.3707	3.36898e-25	1.96439e-23
ENSG00000213923	22	38290691	38318084	-	CSNK1E	protein_coding	845.117	1.84162	0.177668	10.3655	3.55866e-25	2.06848e-23
ENSG00000176407	2	84971093	85059472	+	KCMF1	protein_coding	1883.27	1.45316	0.14025	10.3612	3.72435e-25	2.15803e-23
ENSG00000175197	12	57516588	57521737	-	DDIT3	protein_coding	710.922	4.39887	0.424621	10.3595	3.78881e-25	2.18854e-23
ENSG00000181004	4	122732702	122744942	+	BBS12	protein_coding	444.206	-2.47832	0.239612	-10.343	4.50033e-25	2.59147e-23
ENSG00000087460	20	58839718	58911192	+	GNAS	protein_coding	6422.89	2.08913	0.201997	10.3424	4.52982e-25	2.60037e-23
ENSG00000117461	1	46040140	46133036	-	PIK3R3	protein_coding	778.58	-2.05269	0.198531	-10.3394	4.67453e-25	2.67516e-23
ENSG00000131849	19	58432814	58440153	-	ZNF132	protein_coding	224.775	-2.51086	0.24297	-10.334	4.94374e-25	2.82051e-23
ENSG00000159399	2	74834127	74893359	+	HK2	protein_coding	1227.79	3.87332	0.37506	10.3272	5.30874e-25	3.01947e-23
ENSG00000163104	4	94207611	94291292	+	SMARCAD1	protein_coding	999.078	-2.01775	0.195671	-10.312	6.22122e-25	3.52764e-23
ENSG00000198000	9	92297358	92325636	-	NOL8	protein_coding	863.667	-2.2709	0.220417	-10.3027	6.84831e-25	3.87138e-23
ENSG00000197670	20	53552770	53575863	+	AL157838.1	lncRNA	162.025	4.1058	0.398561	10.3016	6.93278e-25	3.90722e-23
ENSG00000052802	4	165327667	165343164	+	MSMO1	protein_coding	7657.24	3.10253	0.301239	10.2992	7.10155e-25	3.99021e-23
ENSG00000113369	5	91368631	91383317	-	ARRDC3	protein_coding	6172.32	-2.56168	0.24882	-10.2953	7.3974e-25	4.14389e-23
ENSG00000256223	12	133130575	133159465	+	ZNF10	protein_coding	168.002	-4.11583	0.40023	-10.2836	8.35054e-25	4.66373e-23
ENSG00000229337	2	177111036	177212662	-	AC079305.4	lncRNA	94.7258	3.91088	0.380351	10.2823	8.46964e-25	4.71604e-23
ENSG00000176092	1	26321698	26360080	-	CRYBG2	protein_coding	468.544	3.28155	0.319228	10.2796	8.70615e-25	4.83321e-23
ENSG00000181885	17	7259903	7263983	-	CLDN7	protein_coding	3007.51	2.3266	0.22673	10.2616	1.04979e-24	5.81052e-23
ENSG00000108733	17	35574795	35578863	-	PEX12	protein_coding	125.215	-2.62832	0.256163	-10.2603	1.06345e-24	5.86862e-23
ENSG00000167617	19	54465026	54473296	-	CDC42EP5	protein_coding	628.389	3.05952	0.29839	10.2534	1.1422e-24	6.28449e-23
ENSG00000080031	19	55181247	55209506	-	PTPRH	protein_coding	298.269	3.28886	0.321276	10.2369	1.35577e-24	7.43746e-23
ENSG00000171612	1	9539465	9585173	+	SLC25A33	protein_coding	213.458	2.28425	0.223306	10.2292	1.46701e-24	8.024e-23
ENSG00000155657	2	178525989	178830802	-	TTN	protein_coding	354.713	-3.29786	0.322431	-10.2281	1.48339e-24	8.0897e-23
ENSG00000117697	1	212726153	212791782	-	NSL1	protein_coding	395.816	-2.23706	0.218757	-10.2262	1.51269e-24	8.22528e-23
ENSG00000286242	4	102814252	102819881	+	AC018797.3	lncRNA	124.884	2.89956	0.283673	10.2215	1.58915e-24	8.61578e-23
ENSG00000146243	6	78867551	78946440	+	IRAK1BP1	protein_coding	355.755	-2.25961	0.221294	-10.2109	1.77206e-24	9.57946e-23
ENSG00000116678	1	65420652	65641559	+	LEPR	protein_coding	231.038	2.24727	0.220106	10.2099	1.79007e-24	9.64867e-23
ENSG00000197265	8	30578318	30658236	-	GTF2E2	protein_coding	882.552	1.74315	0.170775	10.2073	1.83949e-24	9.88632e-23
ENSG00000075426	2	28392448	28417317	+	FOSL2	protein_coding	1746.64	2.34579	0.230044	10.1971	2.04211e-24	1.09436e-22
ENSG00000099875	19	2037465	2051244	-	MKNK2	protein_coding	3213.52	2.63695	0.258943	10.1835	2.34951e-24	1.25547e-22
ENSG00000237807	8	53493523	53524336	-	AC022034.1	lncRNA	350.272	-3.07027	0.301524	-10.1825	2.37409e-24	1.26496e-22
ENSG00000080371	12	71754863	71800286	+	RAB21	protein_coding	644.712	2.01589	0.198099	10.1761	2.53419e-24	1.34639e-22
ENSG00000107341	9	33817160	33920399	+	UBE2R2	protein_coding	688.543	2.3111	0.227128	10.1753	2.5551e-24	1.35206e-22
ENSG00000142634	1	15409888	15430339	+	EFHD2	protein_coding	1464.18	3.19073	0.31358	10.1752	2.55946e-24	1.35206e-22
ENSG00000022840	12	120533480	120577588	+	RNF10	protein_coding	1464.41	2.45125	0.240945	10.1735	2.60426e-24	1.37183e-22
ENSG00000111254	12	4615508	4649051	-	AKAP3	protein_coding	130.538	-3.43793	0.337988	-10.1718	2.65093e-24	1.39245e-22
ENSG00000240498	9	21994139	22128103	+	CDKN2B-AS1	lncRNA	198.843	-3.29595	0.324314	-10.1628	2.90508e-24	1.52164e-22
ENSG00000164411	6	87282980	87329278	-	GJB7	protein_coding	85.0258	-4.854	0.477728	-10.1606	2.97233e-24	1.55248e-22
ENSG00000214711	2	31173056	31233858	-	CAPN14	protein_coding	595.287	4.38873	0.432705	10.1425	3.57663e-24	1.86286e-22
ENSG00000198435	9	137299631	137302271	-	NRARP	protein_coding	476.913	2.7973	0.276283	10.1248	4.28997e-24	2.22814e-22
ENSG00000184009	17	81509971	81523847	-	ACTG1	protein_coding	22092.5	3.64993	0.360545	10.1234	4.35125e-24	2.25366e-22
ENSG00000124782	6	7107597	7251980	+	RREB1	protein_coding	1213.68	2.09688	0.207177	10.1212	4.44931e-24	2.29802e-22
ENSG00000170832	17	60177327	60422470	-	USP32	protein_coding	1011	1.43624	0.141953	10.1177	4.61219e-24	2.37553e-22
ENSG00000088179	2	119759922	119984899	+	PTPN4	protein_coding	464.526	-1.8049	0.178505	-10.1112	4.92766e-24	2.53099e-22
ENSG00000137331	6	30743199	30744548	-	IER3	protein_coding	439.361	3.88082	0.384004	10.1062	5.18607e-24	2.65635e-22
ENSG00000112983	5	138139766	138178986	-	BRD8	protein_coding	813.063	-1.81195	0.179385	-10.1009	5.47434e-24	2.79629e-22
ENSG00000135763	1	229626247	229660200	+	URB2	protein_coding	107.134	-3.55035	0.351553	-10.099	5.57843e-24	2.84163e-22
ENSG00000163312	4	83407343	83455855	-	HELQ	protein_coding	221.17	-2.54234	0.251916	-10.092	5.99262e-24	3.04425e-22
ENSG00000213719	6	31730581	31739763	-	CLIC1	protein_coding	4768.55	1.74478	0.172968	10.0873	6.29038e-24	3.18678e-22
ENSG00000151651	10	133262420	133276868	-	ADAM8	protein_coding	338.223	3.15842	0.313203	10.0842	6.48592e-24	3.27689e-22
ENSG00000172409	11	57648992	57661865	+	CLP1	protein_coding	238.318	-3.32605	0.329892	-10.0823	6.61879e-24	3.33493e-22
ENSG00000197329	2	64092652	64144420	-	PELI1	protein_coding	1942.55	2.22624	0.22103	10.0721	7.3379e-24	3.68725e-22
ENSG00000101361	20	2652593	2658393	+	NOP56	protein_coding	1276.07	-2.25284	0.223822	-10.0653	7.86578e-24	3.94182e-22
ENSG00000100583	14	77376689	77391497	+	SAMD15	protein_coding	1066.16	-2.34202	0.23283	-10.0589	8.39226e-24	4.19432e-22
ENSG00000162413	1	6590724	6614607	-	KLHL21	protein_coding	967.24	2.4623	0.244988	10.0507	9.12414e-24	4.54785e-22
ENSG00000168264	1	234604269	234609525	-	IRF2BP2	protein_coding	1994.71	2.40287	0.23928	10.0421	9.95153e-24	4.94695e-22
ENSG00000162772	1	212565334	212620777	+	ATF3	protein_coding	1014.52	3.25492	0.32442	10.033	1.09108e-23	5.40933e-22
ENSG00000213793	19	52904417	52923481	-	ZNF888	protein_coding	320.099	-2.12319	0.211648	-10.0317	1.10584e-23	5.46784e-22
ENSG00000131263	X	74582976	74614624	-	RLIM	protein_coding	1909.17	1.19191	0.118895	10.0249	1.18464e-23	5.84194e-22
ENSG00000153558	3	33277025	33403662	+	FBXL2	protein_coding	795.768	-1.95117	0.194872	-10.0125	1.34265e-23	6.60358e-22
ENSG00000158201	18	21650901	21704780	-	ABHD3	protein_coding	361.66	1.81598	0.181415	10.0101	1.37574e-23	6.7484e-22
ENSG00000168806	15	43323649	43330582	-	LCMT2	protein_coding	142.384	-3.38034	0.337724	-10.0092	1.38912e-23	6.79604e-22
ENSG00000141971	19	17405722	17433724	+	MVB12A	protein_coding	354.935	2.27765	0.227591	10.0077	1.41062e-23	6.88309e-22
ENSG00000128923	15	58771192	58861900	+	MINDY2	protein_coding	677.011	2.07322	0.207188	10.0065	1.42771e-23	6.9482e-22
ENSG00000049540	7	74027789	74069907	+	ELN	protein_coding	97.1105	-4.84352	0.484237	-10.0024	1.48777e-23	7.22153e-22
ENSG00000148735	10	113751262	113783429	+	PLEKHS1	protein_coding	2984.71	-1.8092	0.18093	-9.9994	1.53324e-23	7.4228e-22
ENSG00000117501	1	170935471	171064765	+	MROH9	protein_coding	874.966	-2.47042	0.247065	-9.99906	1.53844e-23	7.4286e-22
ENSG00000171813	10	132397168	132417859	+	PWWP2B	protein_coding	557.991	2.42625	0.242698	9.997	1.57087e-23	7.56548e-22
ENSG00000185950	13	109752695	109786583	-	IRS2	protein_coding	502.028	4.14727	0.41498	9.99392	1.62042e-23	7.78389e-22
ENSG00000267430	18	63415317	63416469	-	AC036176.2	processed_pseudogene	54.2083	5.17084	0.51744	9.99312	1.63365e-23	7.82717e-22
ENSG00000075413	14	103385392	103503831	+	MARK3	protein_coding	1425.32	1.5316	0.153269	9.99286	1.63788e-23	7.82722e-22
ENSG00000132467	4	70688532	70690551	+	UTP3	protein_coding	360.199	-1.99986	0.200143	-9.99214	1.64983e-23	7.86403e-22
ENSG00000105497	19	51571283	51592510	+	ZNF175	protein_coding	181.262	-2.76351	0.276691	-9.98771	1.72515e-23	8.20198e-22
ENSG00000127527	19	16355239	16472085	-	EPS15L1	protein_coding	481.006	1.99966	0.2004	9.97836	1.89582e-23	8.99037e-22
ENSG00000145439	4	168863770	169010275	-	CBR4	protein_coding	772.824	-1.42335	0.142711	-9.97362	1.98839e-23	9.40527e-22
ENSG00000143153	1	169105697	169132722	+	ATP1B1	protein_coding	11609.6	1.68452	0.1692	9.95579	2.37933e-23	1.12259e-21
ENSG00000073756	1	186671791	186680423	-	PTGS2	protein_coding	458.643	3.58481	0.360462	9.94504	2.65072e-23	1.24745e-21
ENSG00000137040	9	6011025	6015625	-	RANBP6	protein_coding	1060.47	-2.05428	0.206623	-9.94218	2.72784e-23	1.2805e-21
ENSG00000104055	15	43232590	43266928	-	TGM5	protein_coding	992.869	2.56827	0.258368	9.94036	2.77817e-23	1.30083e-21
ENSG00000188994	6	87152833	87265943	+	ZNF292	protein_coding	1194.27	-1.95649	0.196965	-9.93318	2.98578e-23	1.39101e-21
ENSG00000196428	3	150408335	150466431	+	TSC22D2	protein_coding	463.475	2.77995	0.279863	9.93323	2.98417e-23	1.39101e-21
ENSG00000162757	1	209779208	209784559	-	C1orf74	protein_coding	102.682	-5.74472	0.579021	-9.92144	3.35873e-23	1.56084e-21
ENSG00000197343	7	99558406	99576453	+	ZNF655	protein_coding	981.563	-2.55349	0.257592	-9.91295	3.65702e-23	1.69521e-21
ENSG00000223813	7	29514224	29563670	-	AC007255.1	lncRNA	101.31	-3.74295	0.377745	-9.90866	3.81722e-23	1.76506e-21
ENSG00000204569	6	30600413	30618612	-	PPP1R10	protein_coding	368.526	-3.27983	0.331023	-9.90816	3.83627e-23	1.76946e-21
ENSG00000256294	19	44112181	44134822	+	AC021092.2	protein_coding	155.38	-3.75944	0.379503	-9.90624	3.91097e-23	1.79943e-21
ENSG00000117394	1	42925375	42958868	-	SLC2A1	protein_coding	7790.77	2.95453	0.298375	9.90209	4.07685e-23	1.87111e-21
ENSG00000132436	7	50444128	50542535	-	FIGNL1	protein_coding	185.415	-4.26985	0.431885	-9.88655	4.76145e-23	2.17455e-21
ENSG00000180626	17	5179535	5191868	-	ZNF594	protein_coding	107.735	-9.52774	0.963685	-9.88678	4.75067e-23	2.17455e-21
ENSG00000100219	22	28794555	28800597	-	XBP1	protein_coding	9721.16	-1.67226	0.169176	-9.88472	4.84946e-23	2.20931e-21
ENSG00000160712	1	154405193	154469450	+	IL6R	protein_coding	510.286	2.34142	0.236962	9.88097	5.03416e-23	2.28783e-21
ENSG00000070756	8	100685816	100722809	-	PABPC1	protein_coding	10734.7	2.41838	0.244808	9.87869	5.15031e-23	2.33489e-21
ENSG00000142867	1	85265776	85276632	-	BCL10	protein_coding	739.058	2.46125	0.24922	9.87581	5.30029e-23	2.39702e-21
ENSG00000158406	6	26277609	26285638	-	H4C8	protein_coding	196.971	-4.4643	0.452675	-9.86203	6.08064e-23	2.74324e-21
ENSG00000165555	14	77394021	77423517	-	NOXRED1	protein_coding	134.597	-2.72154	0.276174	-9.85443	6.55874e-23	2.94912e-21
ENSG00000167468	19	1103926	1106791	+	GPX4	protein_coding	2909.02	1.85823	0.188571	9.85428	6.5688e-23	2.94912e-21
ENSG00000076864	1	21596215	21669363	-	RAP1GAP	protein_coding	143.094	3.80141	0.3858	9.85333	6.63099e-23	2.96985e-21
ENSG00000181788	3	150741125	150763477	-	SIAH2	protein_coding	886.367	1.85034	0.18788	9.84854	6.95461e-23	3.10728e-21
ENSG00000006432	14	70722526	70809534	-	MAP3K9	protein_coding	872.375	2.36103	0.239803	9.84572	7.15278e-23	3.18814e-21
ENSG00000278318	19	44417519	44448578	-	ZNF229	protein_coding	231.263	-3.02708	0.307577	-9.84169	7.44516e-23	3.31051e-21
ENSG00000156515	10	69269984	69401884	+	HK1	protein_coding	1812.3	2.77845	0.282357	9.8402	7.55568e-23	3.35161e-21
ENSG00000107372	9	72351413	72365235	-	ZFAND5	protein_coding	3016.45	1.91568	0.194885	9.82978	8.37999e-23	3.7084e-21
ENSG00000108654	17	64498254	64508199	-	DDX5	protein_coding	20688.5	-1.69776	0.172829	-9.8234	8.9283e-23	3.94163e-21
ENSG00000206503	6	29941260	29945884	+	HLA-A	protein_coding	5468.99	1.92749	0.196301	9.81907	9.32005e-23	4.10481e-21
ENSG00000179071	11	85683848	85686195	-	CCDC89	protein_coding	284.063	-4.64299	0.473139	-9.81316	9.8822e-23	4.34208e-21
ENSG00000151657	10	7750962	7787993	-	KIN	protein_coding	270.422	-2.3509	0.239698	-9.80776	1.04258e-22	4.57009e-21
ENSG00000064012	2	201233443	201287711	+	CASP8	protein_coding	449.984	-1.63548	0.166873	-9.80078	1.11714e-22	4.8854e-21
ENSG00000116514	1	32936445	32964685	-	RNF19B	protein_coding	835.411	2.78754	0.284617	9.794	1.19475e-22	5.21248e-21
ENSG00000159840	7	143381295	143391111	+	ZYX	protein_coding	825.367	3.07874	0.314424	9.7917	1.22225e-22	5.31993e-21
ENSG00000167604	19	35887653	35902303	-	NFKBID	protein_coding	142.366	2.39334	0.244531	9.78747	1.27448e-22	5.5343e-21
ENSG00000116001	2	70209444	70248660	-	TIA1	protein_coding	2484.07	-1.93853	0.198079	-9.78664	1.28498e-22	5.56683e-21
ENSG00000174197	15	41621224	41773081	+	MGA	protein_coding	845.671	-1.66904	0.170552	-9.78614	1.29136e-22	5.58144e-21
ENSG00000005801	11	3339261	3379222	-	ZNF195	protein_coding	534.605	-1.79878	0.18386	-9.78344	1.32624e-22	5.71886e-21
ENSG00000162923	1	224385143	224437033	-	WDR26	protein_coding	2395.69	1.36673	0.139705	9.78298	1.33229e-22	5.73161e-21
ENSG00000105058	19	16185380	16192046	+	FAM32A	protein_coding	1335.6	-1.35254	0.138402	-9.77253	1.47713e-22	6.34004e-21
ENSG00000109689	4	26857601	27025381	+	STIM2	protein_coding	1007.36	-1.72664	0.176732	-9.76982	1.51723e-22	6.49712e-21
ENSG00000178741	15	74919791	74938083	-	COX5A	protein_coding	1016.48	2.25155	0.230781	9.75622	1.73499e-22	7.41249e-21
ENSG00000165675	X	130623369	130903317	-	ENOX2	protein_coding	486.657	-1.78511	0.183046	-9.75223	1.80459e-22	7.69211e-21
ENSG00000104290	8	28494205	28574267	+	FZD3	protein_coding	708.44	-1.88126	0.193015	-9.7467	1.90566e-22	8.1043e-21
ENSG00000071051	2	105744912	105894274	+	NCK2	protein_coding	455.182	2.58514	0.265264	9.74552	1.92797e-22	8.18041e-21
ENSG00000151929	10	119651370	119677819	+	BAG3	protein_coding	1084.96	3.0872	0.316836	9.74384	1.96005e-22	8.29755e-21
ENSG00000186577	6	34246381	34249108	-	SMIM29	protein_coding	314.356	2.01761	0.207098	9.74228	1.99032e-22	8.40652e-21
ENSG00000135205	7	77122434	77329533	+	CCDC146	protein_coding	3957.13	-1.84168	0.189047	-9.7419	1.99774e-22	8.41865e-21
ENSG00000137699	11	120111286	120185529	-	TRIM29	protein_coding	8363.75	1.92698	0.197896	9.7373	2.09028e-22	8.78867e-21
ENSG00000166886	12	57089043	57095476	+	NAB2	protein_coding	464.711	2.19033	0.225001	9.73476	2.14329e-22	8.99115e-21
ENSG00000136379	15	80679684	80755621	+	ABHD17C	protein_coding	956.291	2.10486	0.2163	9.73121	2.21939e-22	9.28937e-21
ENSG00000159788	4	3293028	3439913	+	RGS12	protein_coding	970.901	1.93632	0.199162	9.72232	2.4221e-22	1.0115e-20
ENSG00000100100	22	31281594	31292534	-	PIK3IP1	protein_coding	1440.36	1.85048	0.19043	9.71739	2.54219e-22	1.05927e-20
ENSG00000138623	15	74409289	74433958	-	SEMA7A	protein_coding	274.801	7.30788	0.752819	9.70736	2.80504e-22	1.16617e-20
ENSG00000126804	14	64503712	64533690	+	ZBTB1	protein_coding	805.982	-1.27022	0.130868	-9.70613	2.83921e-22	1.17773e-20
ENSG00000169692	9	136673143	136687457	-	AGPAT2	protein_coding	464.155	2.38188	0.245624	9.69727	3.09679e-22	1.28171e-20
ENSG00000174796	4	75513946	75550473	+	THAP6	protein_coding	322.111	-1.71048	0.176432	-9.69486	3.17062e-22	1.30934e-20
ENSG00000171448	9	122915566	122931512	-	ZBTB26	protein_coding	178.397	-2.26358	0.233575	-9.69102	3.29217e-22	1.35652e-20
ENSG00000011638	16	21158377	21180616	+	TMEM159	protein_coding	1012.51	2.38578	0.246257	9.68817	3.38551e-22	1.39189e-20
ENSG00000136938	9	97983341	98015943	+	ANP32B	protein_coding	1077.53	1.79361	0.185231	9.68311	3.55741e-22	1.45932e-20
ENSG00000128274	22	42692121	42721298	-	A4GALT	protein_coding	1750.85	2.1584	0.223128	9.67336	3.91328e-22	1.60177e-20
ENSG00000137309	6	34236873	34246231	+	HMGA1	protein_coding	2412.85	3.59405	0.371614	9.67146	3.98639e-22	1.6281e-20
ENSG00000215251	20	3146519	3159865	-	FASTKD5	protein_coding	641.69	-1.98115	0.204904	-9.66866	4.09705e-22	1.66962e-20
ENSG00000068323	X	49028726	49043410	-	TFE3	protein_coding	515.395	2.45195	0.253641	9.66699	4.16448e-22	1.69337e-20
ENSG00000139263	12	58872149	58920522	-	LRIG3	protein_coding	776.488	-2.31549	0.239737	-9.65844	4.52712e-22	1.8368e-20
ENSG00000268205	19	57304305	57308562	+	AC005261.2	lncRNA	512.633	2.03385	0.210603	9.65726	4.5793e-22	1.85391e-20
ENSG00000266094	1	206507531	206589448	+	RASSF5	protein_coding	753.438	2.17788	0.225658	9.65124	4.85665e-22	1.96192e-20
ENSG00000008323	12	6310436	6328506	+	PLEKHG6	protein_coding	425.875	1.7411	0.18049	9.64652	5.08545e-22	2.04988e-20
ENSG00000260284	16	1286351	1288837	-	TPSP2	unprocessed_pseudogene	50.148	9.83668	1.02025	9.64144	5.3432e-22	2.1491e-20
ENSG00000140987	16	3382081	3401065	-	ZSCAN32	protein_coding	220.957	-3.41318	0.354546	-9.62691	6.15525e-22	2.47036e-20
ENSG00000149313	11	106075501	106098699	+	AASDHPPT	protein_coding	897.357	-2.08516	0.21678	-9.61877	6.66212e-22	2.66802e-20
ENSG00000142273	19	44777869	44800652	+	CBLC	protein_coding	532.823	1.72161	0.179058	9.61486	6.92016e-22	2.76538e-20
ENSG00000254685	1	74198212	74234086	+	FPGT	protein_coding	405.166	-2.18274	0.227097	-9.61152	7.14852e-22	2.85049e-20
ENSG00000276334	2	32521927	32523547	+	AL133243.2	lncRNA	58.9047	3.08796	0.32132	9.61023	7.23899e-22	2.88037e-20
ENSG00000124279	5	7859159	7869037	-	FASTKD3	protein_coding	184.127	-2.33599	0.243085	-9.60977	7.27087e-22	2.88686e-20
ENSG00000158517	7	74773962	74789376	+	NCF1	protein_coding	93.1136	5.60003	0.582829	9.60835	7.3719e-22	2.92072e-20
ENSG00000145780	5	115520908	115544775	-	FEM1C	protein_coding	799.329	1.48246	0.15441	9.6008	7.9326e-22	3.13617e-20
ENSG00000168495	8	22245133	22254601	+	POLR3D	protein_coding	340.447	1.83128	0.190886	9.59356	8.51001e-22	3.35729e-20
ENSG00000008294	17	50962174	51120868	-	SPAG9	protein_coding	1691.12	1.53499	0.160025	9.59219	8.62339e-22	3.3948e-20
ENSG00000154309	1	222872271	223005995	+	DISP1	protein_coding	67.1318	-4.18756	0.436704	-9.58903	8.8916e-22	3.49297e-20
ENSG00000178951	19	4043303	4066899	-	ZBTB7A	protein_coding	1088.52	2.59113	0.270574	9.5764	1.00482e-21	3.93898e-20
ENSG00000065183	1	117929720	117966543	+	WDR3	protein_coding	782.253	-1.94548	0.203369	-9.56623	1.10872e-21	4.33709e-20
ENSG00000147124	X	47445879	47482946	-	ZNF41	protein_coding	207.114	-2.25247	0.235636	-9.55912	1.18764e-21	4.63606e-20
ENSG00000051108	16	56932142	56944864	+	HERPUD1	protein_coding	2168.81	1.62988	0.170518	9.55836	1.19633e-21	4.66015e-20
ENSG00000112584	6	170290703	170407065	+	FAM120B	protein_coding	1102.17	-1.73691	0.181768	-9.55568	1.22781e-21	4.77275e-20
ENSG00000107404	1	1335276	1349418	-	DVL1	protein_coding	1040.6	2.44477	0.25618	9.54314	1.38567e-21	5.37514e-20
ENSG00000240225	19	56368099	56379828	+	ZNF542P	transcribed_unprocessed_pseudogene	209.001	-2.16455	0.226852	-9.5417	1.40517e-21	5.43937e-20
ENSG00000260804	2	216217045	216220192	+	LINC01963	lncRNA	91.9793	-3.56301	0.373434	-9.54123	1.41154e-21	5.45266e-20
ENSG00000165494	11	83156988	83187451	+	PCF11	protein_coding	624.776	-1.44373	0.151368	-9.53793	1.45713e-21	5.61706e-20
ENSG00000031003	5	137937960	138051961	-	FAM13B	protein_coding	572.043	-2.04123	0.214038	-9.5368	1.47312e-21	5.66695e-20
ENSG00000169710	17	82078338	82098294	-	FASN	protein_coding	4550.11	3.68661	0.386832	9.53028	1.56865e-21	6.02194e-20
ENSG00000197714	19	57280051	57294069	+	ZNF460	protein_coding	245.042	2.22282	0.233807	9.50708	1.96091e-21	7.51224e-20
ENSG00000175832	17	43527844	43579620	-	ETV4	protein_coding	150.577	2.96204	0.311634	9.50485	2.0034e-21	7.65917e-20
ENSG00000106299	7	123681943	123749003	-	WASL	protein_coding	1488.29	2.34773	0.247087	9.50162	2.06643e-21	7.8839e-20
ENSG00000221914	8	26291508	26372680	+	PPP2R2A	protein_coding	1684.08	1.29174	0.136189	9.48489	2.42649e-21	9.23861e-20
ENSG00000113615	5	134648785	134727909	+	SEC24A	protein_coding	961.286	1.48252	0.156403	9.47887	2.57056e-21	9.76706e-20
ENSG00000114796	3	183635610	183684519	+	KLHL24	protein_coding	1350.92	1.29205	0.136545	9.46246	3.00784e-21	1.14052e-19
ENSG00000204920	19	43967862	43998326	+	ZNF155	protein_coding	72.6298	-4.71393	0.498206	-9.46181	3.02655e-21	1.14527e-19
ENSG00000135090	12	118149801	118372907	-	TAOK3	protein_coding	630.369	1.4912	0.157611	9.46124	3.04307e-21	1.14918e-19
ENSG00000186141	1	145824088	145844402	+	POLR3C	protein_coding	353.262	-1.50804	0.159501	-9.45471	3.23927e-21	1.22078e-19
ENSG00000155755	2	201620184	201643570	-	TMEM237	protein_coding	401.273	-2.23645	0.236608	-9.45214	3.31983e-21	1.2486e-19
ENSG00000163818	3	45823316	45916042	-	LZTFL1	protein_coding	2368.23	-1.85866	0.196698	-9.44929	3.41134e-21	1.28043e-19
ENSG00000185262	17	76265348	76271298	+	UBALD2	protein_coding	1044.11	2.7288	0.288834	9.44765	3.46528e-21	1.29805e-19
ENSG00000130517	19	18340598	18369950	+	PGPEP1	protein_coding	724.45	1.58041	0.167379	9.44212	3.65312e-21	1.36565e-19
ENSG00000225190	17	45435900	45490749	-	PLEKHM1	protein_coding	715.998	2.10805	0.223291	9.44079	3.69991e-21	1.38036e-19
ENSG00000090776	X	68829021	68842160	+	EFNB1	protein_coding	764.069	2.51656	0.266642	9.43798	3.80038e-21	1.41499e-19
ENSG00000136688	2	112973203	112985658	+	IL36G	protein_coding	542.48	3.72482	0.394764	9.43556	3.88913e-21	1.44514e-19
ENSG00000141232	17	50862223	50867978	-	TOB1	protein_coding	976.509	2.51584	0.266727	9.43227	4.01294e-21	1.48519e-19
ENSG00000152683	2	32165841	32224379	+	SLC30A6	protein_coding	494.449	-1.89411	0.200808	-9.43245	4.00608e-21	1.48519e-19
ENSG00000110660	11	107790991	107928293	-	SLC35F2	protein_coding	313.937	2.75351	0.292093	9.42681	4.22759e-21	1.56151e-19
ENSG00000112081	6	36594353	36605600	+	SRSF3	protein_coding	4601.87	-2.0869	0.221425	-9.42485	4.30719e-21	1.58775e-19
ENSG00000134046	18	54151606	54224669	-	MBD2	protein_coding	1090.11	1.70696	0.181187	9.42101	4.46765e-21	1.64363e-19
ENSG00000170364	3	4303304	4317567	+	SETMAR	protein_coding	179.02	-2.88439	0.306274	-9.41768	4.61164e-21	1.69325e-19
ENSG00000102034	X	130064874	130110716	-	ELF4	protein_coding	285.796	2.8648	0.304318	9.41383	4.78369e-21	1.75295e-19
ENSG00000167981	16	3432414	3443504	-	ZNF597	protein_coding	156.646	-2.6708	0.283771	-9.41182	4.87612e-21	1.78329e-19
ENSG00000164185	5	122129546	122153569	+	ZNF474	protein_coding	522.001	-2.94264	0.312757	-9.40872	5.02201e-21	1.83303e-19
ENSG00000140199	15	34229784	34338060	-	SLC12A6	protein_coding	1487.53	1.51873	0.161591	9.39863	5.52807e-21	2.01378e-19
ENSG00000139505	13	25246201	25288009	-	MTMR6	protein_coding	1396.35	-1.42276	0.151485	-9.39213	5.8798e-21	2.13771e-19
ENSG00000175592	11	65892049	65900573	-	FOSL1	protein_coding	226.912	4.45893	0.474922	9.38877	6.07024e-21	2.20263e-19
ENSG00000148672	10	87050202	87094843	-	GLUD1	protein_coding	3845	1.74971	0.186475	9.38309	6.40666e-21	2.32016e-19
ENSG00000140749	16	21639550	21652608	-	IGSF6	protein_coding	71.3583	4.22021	0.44982	9.38199	6.47399e-21	2.33997e-19
ENSG00000123143	19	14433053	14471867	+	PKN1	protein_coding	519.951	3.02779	0.322753	9.38116	6.52536e-21	2.35395e-19
ENSG00000279765	15	92883413	92949230	+	AC013394.1	protein_coding	123.676	3.80326	0.405425	9.38092	6.54e-21	2.35466e-19
ENSG00000005469	7	87345681	87399795	+	CROT	protein_coding	806.718	-3.10972	0.33206	-9.36493	7.61034e-21	2.73471e-19
ENSG00000139112	12	10212458	10223128	+	GABARAPL1	protein_coding	936.161	1.84725	0.197282	9.36354	7.71091e-21	2.76549e-19
ENSG00000125686	17	39404285	39451272	-	MED1	protein_coding	686.431	-1.59439	0.170289	-9.36281	7.7641e-21	2.77919e-19
ENSG00000274750	6	26224199	26227473	+	H3C6	protein_coding	77.5695	-3.84117	0.410291	-9.36208	7.81803e-21	2.7931e-19
ENSG00000103642	15	63121833	63142061	+	LACTB	protein_coding	329.162	1.94106	0.207449	9.35681	8.21791e-21	2.93032e-19
ENSG00000116273	1	6613731	6624030	+	PHF13	protein_coding	178.627	2.90458	0.310564	9.3526	8.55189e-21	3.04356e-19
ENSG00000105329	19	41301587	41353922	-	TGFB1	protein_coding	910.568	4.97977	0.532482	9.352	8.60095e-21	3.05515e-19
ENSG00000115884	2	20200797	20225433	-	SDC1	protein_coding	13975.2	2.9391	0.314307	9.35105	8.67803e-21	3.07664e-19
ENSG00000174405	13	108207439	108218368	-	LIG4	protein_coding	761.772	-1.45419	0.155515	-9.35077	8.70156e-21	3.07909e-19
ENSG00000004478	12	2794970	2805423	+	FKBP4	protein_coding	1519.35	1.45441	0.155623	9.34573	9.12546e-21	3.22294e-19
ENSG00000099797	19	14517085	14565980	+	TECR	protein_coding	1222.05	2.50158	0.267847	9.33959	9.67036e-21	3.40889e-19
ENSG00000138764	4	77157207	77433388	+	CCNG2	protein_coding	1175.23	2.05901	0.220648	9.33162	1.04266e-20	3.66849e-19
ENSG00000133028	17	10672474	10698375	-	SCO1	protein_coding	594.944	-1.90001	0.203648	-9.32987	1.05999e-20	3.72242e-19
ENSG00000183340	11	96389989	96507574	+	JRKL	protein_coding	420.956	-1.75426	0.188047	-9.32885	1.07025e-20	3.75134e-19
ENSG00000254087	8	55879835	56014169	+	LYN	protein_coding	1491.33	2.10727	0.225908	9.32798	1.07904e-20	3.77502e-19
ENSG00000111653	12	6650301	6663142	-	ING4	protein_coding	429.759	-1.58575	0.170022	-9.32672	1.09201e-20	3.81318e-19
ENSG00000141380	18	26016253	26091217	-	SS18	protein_coding	1682.73	-1.07806	0.1157	-9.31772	1.18863e-20	4.14279e-19
ENSG00000174007	3	196706277	196712250	-	CEP19	protein_coding	168.947	-1.8	0.193267	-9.31353	1.23655e-20	4.30171e-19
ENSG00000166783	16	15594387	15643154	-	MARF1	protein_coding	1345.1	1.59808	0.17169	9.30792	1.30363e-20	4.52656e-19
ENSG00000178935	19	57803841	57814913	-	ZNF552	protein_coding	312.328	-2.64328	0.284307	-9.29728	1.44091e-20	4.9939e-19
ENSG00000148498	10	34109560	34815325	-	PARD3	protein_coding	1421.84	1.65834	0.178412	9.29502	1.47181e-20	5.09147e-19
ENSG00000104218	8	67062426	67196263	+	CSPP1	protein_coding	1582.99	-1.93398	0.208256	-9.28654	1.59392e-20	5.50362e-19
ENSG00000163947	3	56727418	57079329	-	ARHGEF3	protein_coding	780.745	1.28023	0.137889	9.28456	1.6238e-20	5.59468e-19
ENSG00000188215	16	20854925	20900358	-	DCUN1D3	protein_coding	377.889	2.02727	0.218353	9.28439	1.62632e-20	5.59468e-19
ENSG00000166889	11	59636716	59669037	-	PATL1	protein_coding	721.546	1.92432	0.20735	9.28055	1.68604e-20	5.78936e-19
ENSG00000236287	11	10812074	10858796	-	ZBED5	protein_coding	1005.4	-1.97045	0.212343	-9.27953	1.70223e-20	5.83416e-19
ENSG00000166483	11	9573670	9593457	+	WEE1	protein_coding	762.193	1.32926	0.143262	9.27854	1.71809e-20	5.87763e-19
ENSG00000203326	19	53365693	53392217	+	ZNF525	protein_coding	142.802	-2.30064	0.248203	-9.26919	1.87572e-20	6.40509e-19
ENSG00000128408	22	45413693	45432509	+	RIBC2	protein_coding	786.842	-2.25755	0.243637	-9.26605	1.93173e-20	6.58422e-19
ENSG00000173020	11	67266473	67286556	+	GRK2	protein_coding	1133	2.09712	0.226398	9.26299	1.98783e-20	6.76301e-19
ENSG00000225855	1	155316863	155324176	-	RUSC1-AS1	lncRNA	173.884	2.76705	0.298836	9.25943	2.05531e-20	6.97978e-19
ENSG00000183431	1	37956975	37990075	-	SF3A3	protein_coding	1109.79	-1.71418	0.185148	-9.25844	2.0745e-20	7.03207e-19
ENSG00000006831	12	1688574	1788674	+	ADIPOR2	protein_coding	930.114	1.70548	0.184401	9.24876	2.27118e-20	7.68472e-19
ENSG00000204789	6	27357825	27360221	-	ZNF204P	processed_pseudogene	700.758	-1.81598	0.19648	-9.24254	2.40711e-20	8.1298e-19
ENSG00000107864	10	92046692	92291078	-	CPEB3	protein_coding	221.876	1.93305	0.209289	9.23627	2.5523e-20	8.6045e-19
ENSG00000104783	19	43766533	43781257	-	KCNN4	protein_coding	163.324	3.11277	0.33751	9.22276	2.89546e-20	9.74368e-19
ENSG00000139372	12	103965822	103988874	+	TDG	protein_coding	909.627	-1.64039	0.177895	-9.22108	2.94119e-20	9.87964e-19
ENSG00000168497	2	191834310	191847088	-	CAVIN2	protein_coding	67.2975	-6.49698	0.704813	-9.21802	3.02637e-20	1.01474e-18
ENSG00000179262	19	12945855	12953642	+	RAD23A	protein_coding	374.202	2.46633	0.267577	9.21725	3.04816e-20	1.0202e-18
ENSG00000100578	14	58427385	58551297	+	KIAA0586	protein_coding	469.715	-1.72998	0.187701	-9.21665	3.0654e-20	1.02412e-18
ENSG00000198040	12	133037292	133063304	+	ZNF84	protein_coding	780.297	-1.62457	0.176669	-9.19556	3.73039e-20	1.24405e-18
ENSG00000134324	2	11677595	11827409	+	LPIN1	protein_coding	342.536	2.03032	0.220966	9.18841	3.98705e-20	1.32725e-18
ENSG00000051341	3	121431427	121546641	-	POLQ	protein_coding	278.495	-2.98618	0.325064	-9.18646	4.05975e-20	1.34903e-18
ENSG00000090013	19	40447765	40465764	-	BLVRB	protein_coding	1763.13	1.98142	0.215707	9.18569	4.08903e-20	1.35391e-18
ENSG00000126803	14	64535905	64546173	+	HSPA2	protein_coding	140.497	3.68694	0.401374	9.18578	4.0856e-20	1.35391e-18
ENSG00000067533	1	218285293	218337983	+	RRP15	protein_coding	241.541	-2.68088	0.291942	-9.18292	4.19568e-20	1.38674e-18
ENSG00000158050	2	96143169	96145440	-	DUSP2	protein_coding	81.1767	6.57207	0.715822	9.18114	4.26535e-20	1.40726e-18
ENSG00000197062	6	28267010	28278224	+	ZSCAN26	protein_coding	170.506	-2.73791	0.298218	-9.1809	4.2749e-20	1.40791e-18
ENSG00000117751	1	27830782	27851676	+	PPP1R8	protein_coding	665.14	-1.78564	0.194544	-9.17857	4.36834e-20	1.43613e-18
ENSG00000125775	20	1309909	1329139	-	SDCBP2	protein_coding	754.287	2.55007	0.278011	9.17253	4.62053e-20	1.51635e-18
ENSG00000081181	14	67619920	67651708	+	ARG2	protein_coding	126.68	3.31229	0.361226	9.16959	4.74822e-20	1.5555e-18
ENSG00000125534	20	63520765	63522206	+	PPDPF	protein_coding	2122.53	3.49012	0.380689	9.1679	4.82339e-20	1.57734e-18
ENSG00000139531	12	55997180	56006641	+	SUOX	protein_coding	463.987	-1.90071	0.207357	-9.16639	4.89122e-20	1.59671e-18
ENSG00000106615	7	151466012	151520120	-	RHEB	protein_coding	1111.38	1.51885	0.165707	9.16586	4.91535e-20	1.60176e-18
ENSG00000173575	15	92900189	93027996	+	CHD2	protein_coding	2598.9	1.31782	0.143796	9.1645	4.97773e-20	1.61925e-18
ENSG00000198346	19	53467733	53496255	+	ZNF813	protein_coding	117.898	-3.45878	0.377537	-9.16143	5.12131e-20	1.66304e-18
ENSG00000119004	2	203238977	203306026	+	CYP20A1	protein_coding	403.295	-2.01748	0.22027	-9.15911	5.23251e-20	1.69617e-18
ENSG00000119138	9	70384597	70414624	-	KLF9	protein_coding	620.846	2.17772	0.238045	9.14835	5.78115e-20	1.87075e-18
ENSG00000119139	9	69121264	69274615	+	TJP2	protein_coding	236.498	2.56251	0.28015	9.14691	5.85841e-20	1.89245e-18
ENSG00000188064	22	45920366	45977162	-	WNT7B	protein_coding	1051.79	3.11612	0.340892	9.14109	6.18256e-20	1.99369e-18
ENSG00000099194	10	100347233	100364826	+	SCD	protein_coding	21153.5	3.24649	0.355308	9.13712	6.41399e-20	2.06472e-18
ENSG00000117407	1	43933320	43937240	+	ARTN	protein_coding	307.005	3.47533	0.380839	9.12546	7.14349e-20	2.29558e-18
ENSG00000145979	6	13266542	13328583	-	TBC1D7	protein_coding	644.014	1.95994	0.21481	9.12405	7.23681e-20	2.31753e-18
ENSG00000173846	1	44800377	44805990	+	PLK3	protein_coding	459.061	2.10829	0.231066	9.12418	7.22791e-20	2.31753e-18
ENSG00000136932	9	97904489	97922516	-	TRMO	protein_coding	298.987	-2.61375	0.286575	-9.12064	7.4684e-20	2.38757e-18
ENSG00000092439	15	50552473	50686797	-	TRPM7	protein_coding	1103.14	-1.74273	0.191087	-9.1201	7.50582e-20	2.3954e-18
ENSG00000095002	2	47403067	47663146	+	MSH2	protein_coding	592.876	-1.47394	0.161683	-9.11622	7.77936e-20	2.47843e-18
ENSG00000110717	11	68030617	68036644	+	NDUFS8	protein_coding	514.233	2.00112	0.219531	9.11545	7.83412e-20	2.4916e-18
ENSG00000180263	12	95076749	95217482	-	FGD6	protein_coding	680.615	1.54148	0.169137	9.11382	7.95302e-20	2.52508e-18
ENSG00000170776	15	85380571	85749358	+	AKAP13	protein_coding	1333.58	1.38294	0.151835	9.10819	8.37661e-20	2.65503e-18
ENSG00000176102	11	33077188	33162371	-	CSTF3	protein_coding	547.872	-2.20437	0.242109	-9.10485	8.63879e-20	2.73345e-18
ENSG00000145283	4	86823468	86849384	-	SLC10A6	protein_coding	164.147	3.57028	0.392373	9.09919	9.10095e-20	2.87478e-18
ENSG00000260372	18	26655737	27190698	+	AQP4-AS1	lncRNA	235.224	-2.86149	0.314628	-9.09482	9.47424e-20	2.98761e-18
ENSG00000170854	3	97941818	97972457	-	RIOX2	protein_coding	550.326	-1.60379	0.176446	-9.08941	9.95788e-20	3.13479e-18
ENSG00000163814	3	45082277	45146422	-	CDCP1	protein_coding	1547.1	2.23074	0.245436	9.08889	1.00059e-19	3.14455e-18
ENSG00000179813	13	42781550	42791549	+	FAM216B	protein_coding	5922.69	-1.61138	0.177337	-9.08654	1.02238e-19	3.20761e-18
ENSG00000197111	12	53452102	53481162	+	PCBP2	protein_coding	1061.3	1.34105	0.147662	9.08187	1.06723e-19	3.34267e-18
ENSG00000243710	1	43172149	43254358	+	CFAP57	protein_coding	1121.63	-1.89683	0.209364	-9.05998	1.30473e-19	4.07964e-18
ENSG00000119514	9	98807670	98850081	+	GALNT12	protein_coding	422.7	2.12383	0.23445	9.05877	1.31932e-19	4.11833e-18
ENSG00000214029	12	133106817	133130473	-	ZNF891	protein_coding	153.963	-2.6588	0.293549	-9.05742	1.33571e-19	4.16249e-18
ENSG00000197442	6	136557046	136792477	-	MAP3K5	protein_coding	1142.97	1.44302	0.159381	9.05387	1.3799e-19	4.29298e-18
ENSG00000103356	16	23522016	23557731	-	EARS2	protein_coding	401.428	-1.44695	0.15987	-9.05082	1.41898e-19	4.40716e-18
ENSG00000232931	2	95807052	95835003	-	LINC00342	lncRNA	3681.62	-2.05886	0.227483	-9.0506	1.42189e-19	4.4088e-18
ENSG00000171103	2	28849821	28870309	-	TRMT61B	protein_coding	195.647	-2.30464	0.254816	-9.04436	1.50538e-19	4.65301e-18
ENSG00000198700	1	201829149	201884291	+	IPO9	protein_coding	702.628	-1.21746	0.134612	-9.04425	1.50698e-19	4.65301e-18
ENSG00000198876	9	34086387	34127399	-	DCAF12	protein_coding	1350.35	1.33116	0.147184	9.04416	1.50818e-19	4.65301e-18
ENSG00000068885	3	160256986	160399880	-	IFT80	protein_coding	890.514	-1.56847	0.173454	-9.04253	1.53092e-19	4.71533e-18
ENSG00000129657	17	77088749	77217101	+	SEC14L1	protein_coding	1570.75	2.5953	0.287058	9.04102	1.55223e-19	4.77304e-18
ENSG00000163811	2	28894667	28948219	+	WDR43	protein_coding	960.736	-2.04442	0.22616	-9.03972	1.57072e-19	4.82192e-18
ENSG00000168884	4	2741648	2756342	-	TNIP2	protein_coding	394.377	2.03086	0.224817	9.03338	1.66445e-19	5.09879e-18
ENSG00000198416	9	39443815	39508885	-	ZNF658B	transcribed_unprocessed_pseudogene	85.9906	-4.49431	0.497529	-9.03325	1.66641e-19	5.09879e-18
ENSG00000153046	6	4706159	4955551	+	CDYL	protein_coding	353.902	2.43388	0.269701	9.02435	1.80759e-19	5.52163e-18
ENSG00000276234	17	37406886	37479725	+	TADA2A	protein_coding	295.401	-2.05534	0.228033	-9.01335	1.99849e-19	6.09473e-18
ENSG00000117595	1	209785617	209806175	-	IRF6	protein_coding	5538.12	1.40618	0.156226	9.00096	2.2376e-19	6.81275e-18
ENSG00000185591	12	53380176	53416446	+	SP1	protein_coding	3071.99	1.29823	0.144269	8.99867	2.28475e-19	6.9449e-18
ENSG00000128590	7	108569867	108574850	+	DNAJB9	protein_coding	759.981	1.2521	0.139258	8.9912	2.44535e-19	7.40878e-18
ENSG00000224870	1	1399520	1402046	+	MRPL20-AS1	lncRNA	94.5079	-3.06626	0.341025	-8.9913	2.44325e-19	7.40878e-18
ENSG00000067955	16	67028984	67101058	+	CBFB	protein_coding	574.743	1.32429	0.147291	8.99099	2.45009e-19	7.41102e-18
ENSG00000080200	3	97822011	97944984	+	CRYBG3	protein_coding	1150.35	-1.91037	0.212549	-8.98793	2.51936e-19	7.60813e-18
ENSG00000197016	19	56567468	56588911	+	ZNF470	protein_coding	80.4531	-3.26392	0.363271	-8.98481	2.59185e-19	7.81431e-18
ENSG00000175550	11	65919274	65921563	+	DRAP1	protein_coding	595.242	3.19214	0.355363	8.98274	2.64116e-19	7.95007e-18
ENSG00000224660	3	15254184	15264515	+	SH3BP5-AS1	lncRNA	116.148	-2.4501	0.272782	-8.98192	2.66079e-19	7.99617e-18
ENSG00000230590	X	73940435	74293574	-	FTX	lncRNA	815.982	-2.27386	0.253334	-8.97574	2.81462e-19	8.44478e-18
ENSG00000134684	1	32775237	32818153	-	YARS1	protein_coding	1213.56	1.80927	0.201612	8.97405	2.85798e-19	8.56103e-18
ENSG00000136937	9	97633668	97673748	+	NCBP1	protein_coding	1039.53	-1.60501	0.178889	-8.97213	2.90833e-19	8.69779e-18
ENSG00000173153	11	64305497	64316743	+	ESRRA	protein_coding	904.839	1.92641	0.214764	8.96989	2.96798e-19	8.86188e-18
ENSG00000131941	19	32978592	33064888	-	RHPN2	protein_coding	1135.85	2.29775	0.256287	8.96553	3.08804e-19	9.20553e-18
ENSG00000137492	11	76349956	76381132	-	THAP12	protein_coding	617.747	-2.10262	0.234541	-8.96483	3.10758e-19	9.24893e-18
ENSG00000287401	4	76240740	76312098	-	AC034139.1	lncRNA	72.7124	-8.57287	0.956471	-8.96302	3.15903e-19	9.38699e-18
ENSG00000157578	21	39405844	39445805	-	LCA5L	protein_coding	453.015	-2.33996	0.261108	-8.96167	3.19793e-19	9.48736e-18
ENSG00000154642	21	17788974	17819386	-	C21orf91	protein_coding	582.433	-2.04535	0.228459	-8.95278	3.46652e-19	1.02678e-17
ENSG00000065833	6	83210402	83431051	-	ME1	protein_coding	872.37	1.94132	0.216913	8.94976	3.56257e-19	1.05354e-17
ENSG00000179941	12	76344474	76348415	-	BBS10	protein_coding	471.675	-2.01133	0.224749	-8.94926	3.57884e-19	1.05667e-17
ENSG00000141526	17	82228397	82261129	+	SLC16A3	protein_coding	2518.46	2.91358	0.325574	8.94908	3.58472e-19	1.05672e-17
ENSG00000172354	7	100673567	100679174	+	GNB2	protein_coding	1700.09	2.97421	0.332383	8.94813	3.61561e-19	1.06414e-17
ENSG00000053372	1	19251805	19260128	+	MRTO4	protein_coding	315.561	-1.76685	0.197462	-8.9478	3.6264e-19	1.06562e-17
ENSG00000167106	9	127940582	127980989	-	FAM102A	protein_coding	1544.08	2.84314	0.31801	8.94041	3.87726e-19	1.13753e-17
ENSG00000127666	19	4815932	4831704	-	TICAM1	protein_coding	212.834	3.62686	0.405866	8.9361	4.03134e-19	1.18087e-17
ENSG00000119396	9	121178133	121223014	-	RAB14	protein_coding	2524.89	1.1871	0.132907	8.9318	4.19147e-19	1.22584e-17
ENSG00000167779	12	53097436	53102345	+	IGFBP6	protein_coding	766.998	3.15014	0.352799	8.929	4.29867e-19	1.25521e-17
ENSG00000166145	15	40844018	40858207	+	SPINT1	protein_coding	3271.79	3.21548	0.36018	8.92742	4.36062e-19	1.2713e-17
ENSG00000180509	21	34446688	34512210	-	KCNE1	protein_coding	349.499	-2.89866	0.324699	-8.92721	4.36881e-19	1.27169e-17
ENSG00000168137	3	9397615	9479240	+	SETD5	protein_coding	2316.93	1.46367	0.164049	8.92215	4.57321e-19	1.3291e-17
ENSG00000054598	6	1609915	1613897	+	FOXC1	protein_coding	1356.69	2.01464	0.225929	8.91715	4.78451e-19	1.38833e-17
ENSG00000147065	X	65588377	65741931	+	MSN	protein_coding	2730.52	2.39965	0.269162	8.91526	4.86671e-19	1.40998e-17
ENSG00000176658	17	32492522	32877177	-	MYO1D	protein_coding	955.479	3.18027	0.356735	8.91494	4.8807e-19	1.41182e-17
ENSG00000157978	1	25543606	25568886	+	LDLRAP1	protein_coding	597.898	1.68605	0.189206	8.91117	5.04971e-19	1.45844e-17
ENSG00000188321	19	9323772	9351162	+	ZNF559	protein_coding	141.404	-3.32082	0.372868	-8.90615	5.28373e-19	1.52365e-17
ENSG00000008513	8	133454848	133571940	-	ST3GAL1	protein_coding	593.752	2.12795	0.238944	8.90563	5.30826e-19	1.52835e-17
ENSG00000164209	5	110738136	110765161	+	SLC25A46	protein_coding	1141.92	-1.48406	0.166726	-8.9012	5.52456e-19	1.58816e-17
ENSG00000131507	5	142108779	142154440	+	NDFIP1	protein_coding	1425.52	1.95097	0.219239	8.89883	5.64375e-19	1.61991e-17
ENSG00000232656	10	1022630	1045425	+	IDI2-AS1	lncRNA	118.938	3.62426	0.407315	8.89792	5.69045e-19	1.63079e-17
ENSG00000141753	17	40443450	40457725	+	IGFBP4	protein_coding	1124.66	2.96306	0.333016	8.89763	5.7051e-19	1.63247e-17
ENSG00000179833	2	64631621	64751005	-	SERTAD2	protein_coding	687.693	1.89696	0.213264	8.89487	5.8488e-19	1.67101e-17
ENSG00000197006	16	21597218	21657473	+	METTL9	protein_coding	1674.79	2.19552	0.246848	8.8942	5.88394e-19	1.67846e-17
ENSG00000143845	1	204131062	204152044	-	ETNK2	protein_coding	106.148	3.22022	0.362129	8.89246	5.97692e-19	1.70237e-17
ENSG00000157502	X	106168305	106208956	+	PWWP3B	protein_coding	116.794	-4.25936	0.47914	-8.8896	6.13291e-19	1.74412e-17
ENSG00000121005	8	74984505	75034558	+	CRISPLD1	protein_coding	377.502	-2.41959	0.272214	-8.88857	6.19029e-19	1.75774e-17
ENSG00000167658	19	3976056	3985463	-	EEF2	protein_coding	14689.3	3.1855	0.358389	8.88839	6.19996e-19	1.75779e-17
ENSG00000157881	1	2508537	2526611	-	PANK4	protein_coding	252.154	1.77754	0.200144	8.88131	6.60798e-19	1.87061e-17
ENSG00000135829	1	182839347	182887982	+	DHX9	protein_coding	3919.73	-1.43981	0.162291	-8.87178	7.19859e-19	2.0347e-17
ENSG00000075618	7	5592816	5606655	+	FSCN1	protein_coding	1396.95	3.45289	0.389364	8.86803	7.44484e-19	2.1011e-17
ENSG00000132646	20	5114953	5126626	-	PCNA	protein_coding	1324.17	-2.05741	0.232058	-8.86591	7.58796e-19	2.13824e-17
ENSG00000115514	2	99318982	99340702	-	TXNDC9	protein_coding	653.847	-1.84021	0.207621	-8.86328	7.76916e-19	2.18598e-17
ENSG00000185515	X	155071420	155123074	+	BRCC3	protein_coding	506.026	-1.82628	0.206117	-8.86041	7.9723e-19	2.23973e-17
ENSG00000138668	4	82352498	82374503	-	HNRNPD	protein_coding	1436.85	1.42613	0.161055	8.85495	8.37185e-19	2.34842e-17
ENSG00000108349	17	40140318	40172171	+	CASC3	protein_coding	603.736	1.73598	0.196055	8.85455	8.40257e-19	2.35348e-17
ENSG00000173230	3	121663199	121749767	-	GOLGB1	protein_coding	5606.08	-1.57495	0.177885	-8.85376	8.46189e-19	2.36652e-17
ENSG00000177932	5	179060373	179083977	+	ZNF354C	protein_coding	110.655	-3.47343	0.392399	-8.85178	8.61308e-19	2.40518e-17
ENSG00000168710	1	109984765	110023742	+	AHCYL1	protein_coding	2482.21	1.70798	0.193244	8.83847	9.70375e-19	2.70567e-17
ENSG00000131653	16	2155698	2178129	+	TRAF7	protein_coding	747.241	2.39111	0.27063	8.83537	9.97671e-19	2.7776e-17
ENSG00000145911	5	178113532	178126081	+	N4BP3	protein_coding	130.152	3.77193	0.426964	8.83431	1.00719e-18	2.79991e-17
ENSG00000169908	3	149369022	149377692	-	TM4SF1	protein_coding	3473.92	1.8975	0.214829	8.83259	1.02277e-18	2.83895e-17
ENSG00000198742	7	99027438	99144100	-	SMURF1	protein_coding	656.513	2.17733	0.24656	8.83085	1.03881e-18	2.87917e-17
ENSG00000100292	22	35380361	35394207	+	HMOX1	protein_coding	469.48	2.80833	0.31824	8.82455	1.09896e-18	3.04134e-17
ENSG00000111913	6	24804282	25042170	-	RIPOR2	protein_coding	355.86	-2.44356	0.277125	-8.81751	1.17031e-18	3.23397e-17
ENSG00000096401	6	44387706	44450425	+	CDC5L	protein_coding	1671.89	-1.51765	0.172135	-8.81664	1.17945e-18	3.25438e-17
ENSG00000174485	15	65658046	65792293	-	DENND4A	protein_coding	748.329	-1.36807	0.155187	-8.81561	1.19032e-18	3.27948e-17
ENSG00000151012	4	138164097	138242349	-	SLC7A11	protein_coding	498.731	2.13383	0.242062	8.81523	1.19445e-18	3.28597e-17
ENSG00000123607	2	165857475	165953816	-	TTC21B	protein_coding	897.793	-1.56705	0.177788	-8.81413	1.20621e-18	3.30889e-17
ENSG00000177352	3	49162535	49166331	-	CCDC71	protein_coding	283.586	-3.34563	0.379576	-8.81411	1.20635e-18	3.30889e-17
ENSG00000135407	12	57797376	57818704	-	AVIL	protein_coding	78.5456	-4.2419	0.481994	-8.80074	1.35918e-18	3.72259e-17
ENSG00000164615	5	134738548	134752157	+	CAMLG	protein_coding	431.687	1.74237	0.197984	8.80056	1.36135e-18	3.72304e-17
ENSG00000132471	17	75845699	75856507	-	WBP2	protein_coding	1166.11	2.90204	0.329905	8.7966	1.41026e-18	3.85112e-17
ENSG00000155868	5	157137424	157159019	-	MED7	protein_coding	242.04	-1.76259	0.200381	-8.7962	1.41528e-18	3.85913e-17
ENSG00000067082	10	3775996	3785281	-	KLF6	protein_coding	1728.9	2.85514	0.324823	8.78981	1.49813e-18	4.07905e-17
ENSG00000160818	1	156594487	156601496	-	GPATCH4	protein_coding	339.556	-1.80817	0.205717	-8.7896	1.50099e-18	4.08085e-17
ENSG00000110497	11	46396414	46594125	-	AMBRA1	protein_coding	316.851	1.93489	0.22024	8.78534	1.55897e-18	4.23227e-17
ENSG00000070770	16	58157907	58198106	-	CSNK2A2	protein_coding	303.903	2.25498	0.256745	8.78296	1.59232e-18	4.3165e-17
ENSG00000189077	7	75986831	75994656	-	TMEM120A	protein_coding	388.949	1.38677	0.157954	8.77961	1.64049e-18	4.44059e-17
ENSG00000223991	2	240981515	240986072	-	AC104809.1	lncRNA	73.2771	-6.40001	0.729161	-8.77723	1.67551e-18	4.52876e-17
ENSG00000156030	14	73715122	73790285	-	ELMSAN1	protein_coding	510.207	1.73733	0.198221	8.76458	1.87482e-18	5.0601e-17
ENSG00000155761	1	117953590	118185228	-	SPAG17	protein_coding	4221.24	-1.65021	0.18829	-8.76419	1.88129e-18	5.07018e-17
ENSG00000058729	5	97160867	97183247	-	RIOK2	protein_coding	440.474	-2.1312	0.243221	-8.76237	1.91191e-18	5.14523e-17
ENSG00000164142	4	151409176	151670503	+	FAM160A1	protein_coding	553.906	1.62194	0.185219	8.75688	2.00727e-18	5.39402e-17
ENSG00000110841	12	27523431	27695564	+	PPFIBP1	protein_coding	973.771	1.43249	0.163594	8.75635	2.01671e-18	5.41156e-17
ENSG00000105771	19	43727983	43754962	-	SMG9	protein_coding	296.309	2.09375	0.239326	8.74853	2.16142e-18	5.79147e-17
ENSG00000185220	1	248906196	248919946	+	PGBD2	protein_coding	115.111	-2.79396	0.319391	-8.74779	2.17576e-18	5.82151e-17
ENSG00000144061	2	110122311	110205066	-	NPHP1	protein_coding	2357.4	-1.74215	0.199272	-8.74261	2.27792e-18	6.08604e-17
ENSG00000223461	22	19121529	19124503	+	AC004471.1	lncRNA	35.2684	5.60729	0.641917	8.73522	2.43188e-18	6.48805e-17
ENSG00000101493	18	76357682	76495242	-	ZNF516	protein_coding	643.301	1.89089	0.216608	8.72957	2.5565e-18	6.81073e-17
ENSG00000255303	11	57861948	57873588	-	OR5BA1P	transcribed_unprocessed_pseudogene	64.1899	-8.83131	1.01245	-8.7227	2.71655e-18	7.22673e-17
ENSG00000271270	3	129893811	129918575	+	TMCC1-AS1	lncRNA	57.968	-3.86428	0.44309	-8.7212	2.75268e-18	7.31236e-17
ENSG00000105887	7	135926760	135977359	-	MTPN	protein_coding	4554.78	1.20186	0.137859	8.718	2.83156e-18	7.51112e-17
ENSG00000118508	6	146543833	146554953	+	RAB32	protein_coding	236.353	3.43895	0.394843	8.70966	3.04791e-18	8.07347e-17
ENSG00000167996	11	61959718	61967634	-	FTH1	protein_coding	3109.87	3.08372	0.354283	8.70412	3.2005e-18	8.46557e-17
ENSG00000173801	17	41754604	41786931	-	JUP	protein_coding	4360.34	3.03831	0.349097	8.70333	3.22277e-18	8.50054e-17
ENSG00000275678	1	67121605	67123956	-	AL133320.2	lncRNA	208.771	-2.36221	0.271415	-8.70333	3.22289e-18	8.50054e-17
ENSG00000125968	20	31605283	31606515	+	ID1	protein_coding	5394.39	2.2688	0.260783	8.69998	3.31932e-18	8.74245e-17
ENSG00000182141	19	21291160	21329425	-	ZNF708	protein_coding	234.607	-2.97301	0.341912	-8.69523	3.46132e-18	9.10352e-17
ENSG00000131435	5	132257696	132273454	+	PDLIM4	protein_coding	484.075	2.46855	0.283907	8.69494	3.47019e-18	9.11393e-17
ENSG00000102882	16	30114105	30123506	-	MAPK3	protein_coding	1509.79	1.65534	0.190452	8.69162	3.57318e-18	9.37112e-17
ENSG00000140835	16	71525233	71538746	+	CHST4	protein_coding	269.388	-2.45121	0.282341	-8.68172	3.89816e-18	1.0209e-16
ENSG00000177971	15	75639085	75648706	-	IMP3	protein_coding	216.173	-2.06528	0.238086	-8.67452	4.15316e-18	1.08615e-16
ENSG00000120694	13	31134973	31162388	-	HSPH1	protein_coding	7907.75	1.26738	0.14619	8.66939	4.34433e-18	1.13454e-16
ENSG00000132801	20	45857614	45879122	+	ZSWIM3	protein_coding	67.9697	-6.31692	0.729371	-8.66077	4.68572e-18	1.22198e-16
ENSG00000134109	3	5187646	5219958	+	EDEM1	protein_coding	661.6	1.96696	0.227143	8.65956	4.73571e-18	1.23328e-16
ENSG00000101187	20	62642503	62685785	+	SLCO4A1	protein_coding	88.1612	4.73151	0.546538	8.65724	4.83343e-18	1.25696e-16
ENSG00000108406	17	59565558	59608345	+	DHX40	protein_coding	2427.91	-1.6333	0.188735	-8.65391	4.97635e-18	1.29232e-16
ENSG00000162643	1	84999147	85133138	+	WDR63	protein_coding	2329.86	-1.66415	0.192394	-8.64972	5.16279e-18	1.33886e-16
ENSG00000165660	10	124801819	124836667	+	ABRAXAS2	protein_coding	635.112	-1.93187	0.22337	-8.64872	5.20786e-18	1.34866e-16
ENSG00000047457	3	149162410	149221829	-	CP	protein_coding	8126.72	-2.09731	0.242537	-8.64737	5.2699e-18	1.36282e-16
ENSG00000158769	1	160995211	161021343	-	F11R	protein_coding	2044.98	1.69992	0.196954	8.63105	6.0791e-18	1.5699e-16
ENSG00000273247	4	139411927	139454034	-	AC097376.3	lncRNA	48.8848	-4.752	0.550676	-8.6294	6.16768e-18	1.59056e-16
ENSG00000100226	22	38705742	38738299	+	GTPBP1	protein_coding	799.854	1.89419	0.219538	8.62809	6.23837e-18	1.60655e-16
ENSG00000154217	17	67377281	67697261	+	PITPNC1	protein_coding	253.463	2.14851	0.249156	8.62315	6.51396e-18	1.6752e-16
ENSG00000009413	6	111299028	111483715	-	REV3L	protein_coding	912.479	-1.72579	0.200144	-8.62277	6.53543e-18	1.67839e-16
ENSG00000165115	9	83834099	83921465	-	KIF27	protein_coding	969.733	-1.46909	0.170559	-8.61337	7.09434e-18	1.81941e-16
ENSG00000235173	8	144137774	144140851	+	HGH1	protein_coding	136.178	-2.08687	0.242313	-8.61228	7.16244e-18	1.83434e-16
ENSG00000244879	15	50354959	50372202	+	GABPB1-AS1	lncRNA	855.768	-2.19566	0.255259	-8.60168	7.85542e-18	2.00904e-16
ENSG00000105171	19	29606283	29617237	+	POP4	protein_coding	623.588	-1.71555	0.199508	-8.59895	8.04519e-18	2.05474e-16
ENSG00000155393	16	50065970	50107272	+	HEATR3	protein_coding	461.146	-2.0884	0.24293	-8.59674	8.20116e-18	2.09169e-16
ENSG00000188910	1	34781214	34786369	+	GJB3	protein_coding	865.723	2.7077	0.315152	8.59174	8.56598e-18	2.17933e-16
ENSG00000245849	15	40686183	40695107	-	RAD51-AS1	lncRNA	122.923	-3.16956	0.368909	-8.59171	8.56829e-18	2.17933e-16
ENSG00000164219	5	115204012	115262877	-	PGGT1B	protein_coding	826.283	-1.57608	0.183476	-8.59016	8.68501e-18	2.20599e-16
ENSG00000172893	11	71428193	71452868	-	DHCR7	protein_coding	754.915	3.01873	0.351737	8.58236	9.29486e-18	2.35767e-16
ENSG00000125148	16	56608584	56609497	+	MT2A	protein_coding	9831.43	2.30046	0.268079	8.58126	9.3836e-18	2.37692e-16
ENSG00000171940	20	53567065	53609907	-	ZNF217	protein_coding	2646.04	1.30897	0.152544	8.58091	9.41256e-18	2.381e-16
ENSG00000155530	7	134127299	134264591	+	LRGUK	protein_coding	479.313	-1.75174	0.20422	-8.5777	9.67919e-18	2.44512e-16
ENSG00000010539	16	3222325	3236221	-	ZNF200	protein_coding	168.814	-2.62016	0.305565	-8.5748	9.92549e-18	2.50052e-16
ENSG00000125347	5	132481609	132490777	-	IRF1	protein_coding	924.651	2.74829	0.320507	8.57481	9.92486e-18	2.50052e-16
ENSG00000111845	6	10694972	10709782	+	PAK1IP1	protein_coding	326.038	-2.10745	0.245964	-8.56811	1.05194e-17	2.64655e-16
ENSG00000146232	6	44258166	44265788	-	NFKBIE	protein_coding	345.732	2.1826	0.254868	8.56365	1.09348e-17	2.74732e-16
ENSG00000182107	14	61277370	61281761	-	TMEM30B	protein_coding	993.532	2.24304	0.261959	8.56259	1.1036e-17	2.769e-16
ENSG00000061676	2	182909115	183038858	-	NCKAP1	protein_coding	3986.8	1.45997	0.170554	8.56013	1.12736e-17	2.8248e-16
ENSG00000163082	2	222424543	222562621	+	SGPP2	protein_coding	1200.96	2.29717	0.268435	8.55764	1.15201e-17	2.88268e-16
ENSG00000004864	7	96120220	96322147	-	SLC25A13	protein_coding	493.399	-1.62552	0.189957	-8.55727	1.15575e-17	2.88813e-16
ENSG00000180573	6	26124145	26139116	+	H2AC6	protein_coding	1952.27	-2.45976	0.287499	-8.55573	1.17123e-17	2.92287e-16
ENSG00000127452	19	9810267	9827816	-	FBXL12	protein_coding	216.039	1.85866	0.217361	8.55103	1.21998e-17	3.04043e-16
ENSG00000279348	2	216211404	216213519	+	AC012513.3	TEC	64.6561	-3.62408	0.423876	-8.54986	1.23235e-17	3.06714e-16
ENSG00000166828	16	23182745	23216883	+	SCNN1G	protein_coding	62.0445	3.42955	0.401194	8.54836	1.24855e-17	3.1033e-16
ENSG00000251474	3	129382922	129399655	-	RPL32P3	transcribed_unprocessed_pseudogene	450.836	-1.95775	0.22908	-8.54617	1.27241e-17	3.15836e-16
ENSG00000110987	12	122019422	122062044	+	BCL7A	protein_coding	466.201	1.67106	0.195751	8.53664	1.38183e-17	3.42539e-16
ENSG00000044574	9	125234853	125241343	-	HSPA5	protein_coding	11763.3	1.34338	0.157393	8.5352	1.39914e-17	3.46367e-16
ENSG00000182827	1	226144679	226186741	-	ACBD3	protein_coding	2031	1.4193	0.166295	8.53481	1.4038e-17	3.47058e-16
ENSG00000100722	14	88562970	88627596	+	ZC3H14	protein_coding	1582.07	-1.55016	0.181676	-8.53254	1.43164e-17	3.53467e-16
ENSG00000068903	19	38878555	38899862	-	SIRT2	protein_coding	594.112	1.40454	0.164628	8.5316	1.44341e-17	3.559e-16
ENSG00000178726	20	23045633	23049672	-	THBD	protein_coding	521.582	3.52924	0.413677	8.53138	1.44606e-17	3.56081e-16
ENSG00000154764	3	13816258	13880071	-	WNT7A	protein_coding	112.702	5.68755	0.666798	8.52965	1.46792e-17	3.60984e-16
ENSG00000066084	12	50504985	50748657	+	DIP2B	protein_coding	988.8	1.67613	0.196562	8.52722	1.4991e-17	3.68163e-16
ENSG00000131669	9	93121496	93134251	-	NINJ1	protein_coding	498.628	2.63543	0.309112	8.52581	1.51739e-17	3.72163e-16
ENSG00000178607	17	64039142	64130819	-	ERN1	protein_coding	271.276	2.31071	0.271054	8.52492	1.52919e-17	3.74561e-16
ENSG00000249621	5	122321291	122323358	-	AC113349.1	lncRNA	122.136	-3.31609	0.389029	-8.524	1.54133e-17	3.77037e-16
ENSG00000122952	10	56357227	56361273	-	ZWINT	protein_coding	223.634	-4.17037	0.489423	-8.52099	1.58192e-17	3.86455e-16
ENSG00000172296	20	13008972	13169103	+	SPTLC3	protein_coding	340.055	-1.84195	0.216218	-8.51893	1.61028e-17	3.92865e-16
ENSG00000135604	6	144150517	144191939	+	STX11	protein_coding	149.17	2.43527	0.285908	8.51767	1.62792e-17	3.96648e-16
ENSG00000106665	7	74289407	74405935	+	CLIP2	protein_coding	183.18	2.80092	0.328982	8.51392	1.6815e-17	4.09164e-16
ENSG00000135070	9	86264546	86283102	-	ISCA1	protein_coding	737.984	-1.32677	0.155851	-8.51305	1.69412e-17	4.11695e-16
ENSG00000118407	6	75291859	75493800	-	FILIP1	protein_coding	157.459	-3.48772	0.40973	-8.51223	1.70613e-17	4.14071e-16
ENSG00000257621	14	58265365	58298134	-	PSMA3-AS1	lncRNA	486.35	-1.84617	0.217416	-8.49145	2.04082e-17	4.94651e-16
ENSG00000187098	3	69739435	69968337	+	MITF	protein_coding	543.596	-1.71924	0.202477	-8.49103	2.04818e-17	4.95788e-16
ENSG00000173166	2	203394345	203535335	-	RAPH1	protein_coding	140.494	3.17387	0.373937	8.48772	2.10733e-17	5.0944e-16
ENSG00000077549	1	19338775	19485539	-	CAPZB	protein_coding	1286.19	2.53898	0.299158	8.48707	2.1191e-17	5.11619e-16
ENSG00000206530	3	113286930	113441610	-	CFAP44	protein_coding	2605.02	-1.56234	0.184106	-8.4861	2.13682e-17	5.15228e-16
ENSG00000146476	6	151452258	151470101	+	ARMT1	protein_coding	885.345	-1.55156	0.182846	-8.4856	2.14608e-17	5.16786e-16
ENSG00000273142	7	66902857	66906297	+	LINC02604	lncRNA	175.602	-2.54857	0.300418	-8.48341	2.18696e-17	5.25949e-16
ENSG00000125753	19	45506579	45526983	+	VASP	protein_coding	753.539	2.15194	0.25369	8.48257	2.20266e-17	5.29039e-16
ENSG00000110768	11	18322295	18367045	+	GTF2H1	protein_coding	1147.79	-1.65871	0.195564	-8.48168	2.21965e-17	5.32428e-16
ENSG00000060138	12	10699089	10723323	-	YBX3	protein_coding	4088.81	1.49774	0.176646	8.47878	2.27572e-17	5.45172e-16
ENSG00000006704	7	74453790	74602604	+	GTF2IRD1	protein_coding	632.873	1.87982	0.221786	8.47584	2.33397e-17	5.58407e-16
ENSG00000007047	19	45079288	45305284	+	MARK4	protein_coding	416.547	2.52943	0.298549	8.47242	2.4035e-17	5.743e-16
ENSG00000170113	15	22773063	22829789	+	NIPA1	protein_coding	500.662	1.52637	0.180214	8.46975	2.45916e-17	5.86843e-16
ENSG00000112715	6	43770184	43786487	+	VEGFA	polymorphic_pseudogene	1774	2.23288	0.263719	8.46687	2.52068e-17	6.0075e-16
ENSG00000089327	19	35154730	35169881	+	FXYD5	protein_coding	178.301	2.56778	0.303312	8.4658	2.54397e-17	6.05525e-16
ENSG00000143376	1	151612006	151699091	+	SNX27	protein_coding	565.091	2.21312	0.261497	8.46328	2.59961e-17	6.17974e-16
ENSG00000186409	1	42463221	42657190	+	CCDC30	protein_coding	733.85	-1.95061	0.230542	-8.46098	2.65135e-17	6.29467e-16
ENSG00000263465	11	95067197	95071224	+	SRSF8	protein_coding	662.85	-1.37473	0.16251	-8.45938	2.68811e-17	6.37377e-16
ENSG00000137574	8	55773446	55826445	+	TGS1	protein_coding	317.36	-2.13048	0.252184	-8.44812	2.9603e-17	7.01019e-16
ENSG00000166526	7	100064033	100082548	-	ZNF3	protein_coding	810.685	-1.24889	0.147863	-8.44626	3.00779e-17	7.11357e-16
ENSG00000162817	1	220690363	220699153	+	C1orf115	protein_coding	84.4488	3.31086	0.392052	8.44494	3.04196e-17	7.18522e-16
ENSG00000023909	1	93885199	93909456	-	GCLM	protein_coding	2099.63	1.59868	0.189532	8.43488	3.31539e-17	7.82112e-16
ENSG00000070718	8	42152946	42171673	+	AP3M2	protein_coding	729.81	-1.55065	0.183851	-8.4343	3.33203e-17	7.85038e-16
ENSG00000285684	13	80115733	80134368	-	AL137781.1	lncRNA	110.843	-4.67482	0.554443	-8.43157	3.41058e-17	8.02524e-16
ENSG00000176024	19	51927147	51948759	+	ZNF613	protein_coding	85.0783	-2.78294	0.330086	-8.43097	3.42808e-17	8.05619e-16
ENSG00000129194	17	7588178	7590094	-	SOX15	protein_coding	458.602	2.48567	0.294983	8.42647	3.5624e-17	8.36128e-16
ENSG00000089195	20	5937228	5950558	-	TRMT6	protein_coding	289.321	-1.84528	0.219032	-8.42469	3.61707e-17	8.47884e-16
ENSG00000167508	16	88651935	88663161	-	MVD	protein_coding	604.74	2.62971	0.312359	8.41885	3.80193e-17	8.90094e-16
ENSG00000149922	16	30085793	30091887	-	TBX6	protein_coding	139.922	2.55391	0.303413	8.41729	3.85296e-17	9.00904e-16
ENSG00000166189	10	102065349	102068036	+	HPS6	protein_coding	172.077	-2.99136	0.355428	-8.41623	3.88798e-17	9.07946e-16
ENSG00000128849	15	57375967	57550727	+	CGNL1	protein_coding	140.62	4.28445	0.509301	8.41241	4.01657e-17	9.36796e-16
ENSG00000114670	3	131026850	131350465	+	NEK11	protein_coding	1886.2	-1.80219	0.214277	-8.41057	4.0801e-17	9.50417e-16
ENSG00000157330	1	12746200	12763699	+	C1orf158	protein_coding	484.002	-1.96242	0.233398	-8.40807	4.16798e-17	9.6967e-16
ENSG00000109846	11	111908564	111923722	-	CRYAB	protein_coding	1345.92	5.63795	0.670893	8.40365	4.32796e-17	1.00563e-15
ENSG00000010072	1	231337104	231355023	+	SPRTN	protein_coding	416.549	-1.86745	0.222286	-8.40111	4.42262e-17	1.02634e-15
ENSG00000124275	5	7851186	7906025	+	MTRR	protein_coding	731.752	-1.84111	0.219189	-8.39963	4.47888e-17	1.03696e-15
ENSG00000238113	9	62801461	62813486	+	LINC01410	lncRNA	86.1894	-4.10985	0.48929	-8.39961	4.4796e-17	1.03696e-15
ENSG00000137216	6	44126914	44155519	+	TMEM63B	protein_coding	957.422	2.22308	0.26477	8.39625	4.6097e-17	1.06575e-15
ENSG00000181007	19	36383120	36418644	-	ZFP82	protein_coding	78.6441	-3.26297	0.388635	-8.39597	4.6208e-17	1.06698e-15
ENSG00000169100	X	1386152	1392113	-	SLC25A6	protein_coding	2550.62	2.25641	0.268854	8.39269	4.75137e-17	1.09577e-15
ENSG00000013392	6	83193357	83198935	+	RWDD2A	protein_coding	103.396	-2.71761	0.323826	-8.39219	4.77182e-17	1.09912e-15
ENSG00000116871	1	36155579	36180849	+	MAP7D1	protein_coding	1263.33	2.97018	0.353964	8.39118	4.81291e-17	1.10721e-15
ENSG00000133114	13	44989529	45037669	+	GPALPP1	protein_coding	514.406	-1.79961	0.214561	-8.38741	4.96962e-17	1.14184e-15
ENSG00000108592	17	63819433	63830012	-	FTSJ3	protein_coding	567.551	-1.41762	0.169168	-8.37998	5.29385e-17	1.21483e-15
ENSG00000117410	1	43974487	43978295	+	ATP6V0B	protein_coding	1735.84	1.49734	0.178689	8.37956	5.31277e-17	1.21767e-15
ENSG00000165175	X	38801432	38806537	+	MID1IP1	protein_coding	1025.88	2.17998	0.260336	8.37373	5.58248e-17	1.2779e-15
ENSG00000236164	6	46758296	46761158	-	AL161618.1	lncRNA	185.956	-2.6143	0.312239	-8.37275	5.62887e-17	1.28694e-15
ENSG00000170385	1	211571568	211579161	-	SLC30A1	protein_coding	803.567	2.16894	0.259156	8.36925	5.79844e-17	1.32407e-15
ENSG00000138750	4	76114659	76148444	-	NUP54	protein_coding	669.272	-1.85431	0.221598	-8.36792	5.86462e-17	1.33754e-15
ENSG00000152582	5	35617844	35814611	+	SPEF2	protein_coding	2733.63	-1.69415	0.202478	-8.36708	5.90655e-17	1.34545e-15
ENSG00000184454	1	24556087	24609328	+	NCMAP	protein_coding	257.177	2.40368	0.287337	8.36536	5.99331e-17	1.36353e-15
ENSG00000215068	5	43041575	43054603	+	AC025171.2	lncRNA	172.136	-2.24248	0.268219	-8.36063	6.23851e-17	1.41758e-15
ENSG00000161714	17	45108959	45133354	-	PLCD3	protein_coding	641.686	3.00091	0.359271	8.35278	6.66772e-17	1.51325e-15
ENSG00000269837	19	23255053	23257939	-	IPO5P1	transcribed_processed_pseudogene	69.6344	-3.27007	0.391533	-8.35197	6.71339e-17	1.52176e-15
ENSG00000176915	12	132725503	132761832	-	ANKLE2	protein_coding	1738.06	1.2493	0.149631	8.34917	6.87446e-17	1.55636e-15
ENSG00000177981	12	48147789	48181213	-	ASB8	protein_coding	366.314	-1.82181	0.218208	-8.34899	6.88498e-17	1.55684e-15
ENSG00000106692	9	105558130	105641118	+	FKTN	protein_coding	546.697	-1.47727	0.177035	-8.34449	7.15248e-17	1.61536e-15
ENSG00000105373	19	47745546	47757058	+	NOP53	protein_coding	1135.63	2.13703	0.256163	8.34246	7.27629e-17	1.64133e-15
ENSG00000011304	19	797075	812327	+	PTBP1	protein_coding	2211.16	2.00716	0.240634	8.34113	7.35846e-17	1.65756e-15
ENSG00000184731	2	38814	46870	-	FAM110C	protein_coding	483.715	1.82281	0.218536	8.34101	7.36613e-17	1.65756e-15
ENSG00000137409	6	36968141	36986298	-	MTCH1	protein_coding	1613.26	2.12993	0.255551	8.33464	7.77342e-17	1.74709e-15
ENSG00000131508	5	139526431	139628434	+	UBE2D2	protein_coding	734.185	1.53486	0.184236	8.33093	8.02126e-17	1.80061e-15
ENSG00000149483	11	61362344	61369509	+	TMEM138	protein_coding	926.802	-1.77075	0.212565	-8.33038	8.05842e-17	1.80676e-15
ENSG00000062725	17	60443158	60526242	-	APPBP2	protein_coding	666.913	-1.2245	0.147157	-8.32105	8.71839e-17	1.95237e-15
ENSG00000130725	19	58555712	58558954	-	UBE2M	protein_coding	471.754	2.21534	0.266262	8.32016	8.78439e-17	1.96478e-15
ENSG00000197603	5	37106228	37249428	-	CPLANE1	protein_coding	1851.7	-1.83418	0.22049	-8.31863	8.89847e-17	1.9879e-15
ENSG00000205937	16	2253116	2268397	-	RNPS1	protein_coding	694.869	1.63105	0.196121	8.31655	9.05609e-17	2.02067e-15
ENSG00000171962	17	17972813	18016889	+	DRC3	protein_coding	1243.28	-1.96174	0.23595	-8.31424	9.23447e-17	2.058e-15
ENSG00000115827	2	171434217	171485052	+	DCAF17	protein_coding	394.455	-1.49566	0.179901	-8.31379	9.269e-17	2.06322e-15
ENSG00000116106	2	221418027	221574202	-	EPHA4	protein_coding	1036.28	-2.6883	0.323456	-8.31119	9.4746e-17	2.10645e-15
ENSG00000035664	15	63907036	64072033	-	DAPK2	protein_coding	196.135	2.17185	0.261399	8.30857	9.6863e-17	2.15094e-15
ENSG00000169174	1	55039447	55064852	+	PCSK9	protein_coding	175.409	3.3464	0.402918	8.30541	9.94751e-17	2.2063e-15
ENSG00000055044	2	202265736	202303661	+	NOP58	protein_coding	916.271	-1.93952	0.233564	-8.30402	1.0065e-16	2.22703e-15
ENSG00000126458	19	49635292	49640143	-	RRAS	protein_coding	602.149	2.54006	0.305878	8.30415	1.00533e-16	2.22703e-15
ENSG00000140463	15	72686179	72738475	+	BBS4	protein_coding	883.114	-1.6083	0.193682	-8.30382	1.0082e-16	2.22812e-15
ENSG00000196268	19	21397119	21427573	+	ZNF493	protein_coding	312.28	-2.0514	0.247073	-8.30281	1.01675e-16	2.24435e-15
ENSG00000169288	4	77862830	77952785	+	MRPL1	protein_coding	368.91	-2.56402	0.308842	-8.30204	1.0234e-16	2.25634e-15
ENSG00000079257	3	158645822	158672648	-	LXN	protein_coding	990.082	-1.42124	0.171236	-8.29988	1.04214e-16	2.29493e-15
ENSG00000088205	2	117814691	117832377	+	DDX18	protein_coding	1838.36	-1.70748	0.205756	-8.29861	1.05336e-16	2.3169e-15
ENSG00000142409	19	56087366	56121295	-	ZNF787	protein_coding	311.453	1.99328	0.240245	8.29685	1.06911e-16	2.34874e-15
ENSG00000163681	3	57755450	57930003	+	SLMAP	protein_coding	2039.42	1.18491	0.142834	8.2957	1.07951e-16	2.36628e-15
ENSG00000170421	12	52897187	52949954	-	KRT8	protein_coding	14885.2	1.4852	0.179033	8.29568	1.07964e-16	2.36628e-15
ENSG00000124217	20	50958818	50963929	+	MOCS3	protein_coding	154.235	-1.86006	0.224413	-8.28854	1.14642e-16	2.50968e-15
ENSG00000105438	19	48382575	48391551	-	KDELR1	protein_coding	1114.44	3.14538	0.379601	8.28602	1.17098e-16	2.56042e-15
ENSG00000137601	4	169392857	169612629	-	NEK1	protein_coding	1128.7	-1.61039	0.194376	-8.28492	1.18185e-16	2.58113e-15
ENSG00000112335	6	108211222	108261246	-	SNX3	protein_coding	1961.17	1.56377	0.188891	8.27869	1.24541e-16	2.71675e-15
ENSG00000169981	3	44648732	44660791	+	ZNF35	protein_coding	159.519	-2.15031	0.259877	-8.27433	1.29181e-16	2.81465e-15
ENSG00000108352	17	40177010	40195656	+	RAPGEFL1	protein_coding	2474.15	2.00285	0.242088	8.27326	1.30342e-16	2.83662e-15
ENSG00000103126	16	287440	352723	-	AXIN1	protein_coding	286.449	2.44507	0.295645	8.2703	1.33625e-16	2.90466e-15
ENSG00000166197	10	102152176	102163871	+	NOLC1	protein_coding	1687.98	-1.43666	0.173802	-8.26607	1.3845e-16	3.00602e-15
ENSG00000136040	12	94148577	94307675	+	PLXNC1	protein_coding	92.1208	-3.19037	0.386077	-8.26354	1.41414e-16	3.06678e-15
ENSG00000168612	20	45881227	45885266	+	ZSWIM1	protein_coding	180.25	-1.87548	0.227004	-8.26185	1.43431e-16	3.10689e-15
ENSG00000081923	18	57646426	57803315	-	ATP8B1	protein_coding	1532.96	1.32065	0.159909	8.25873	1.4723e-16	3.18546e-15
ENSG00000259225	15	37980676	38062340	+	LINC02345	lncRNA	314.864	-2.15282	0.260741	-8.25654	1.4995e-16	3.24053e-15
ENSG00000198832	22	31104772	31120069	-	SELENOM	protein_coding	194.518	1.90303	0.230521	8.25534	1.5147e-16	3.26956e-15
ENSG00000184939	16	68530090	68576072	+	ZFP90	protein_coding	497.768	-1.52057	0.184297	-8.25064	1.57547e-16	3.39678e-15
ENSG00000101266	20	472498	543835	-	CSNK2A1	protein_coding	3257.65	1.1057	0.134072	8.24706	1.62332e-16	3.49589e-15
ENSG00000146376	6	129576132	129710177	-	ARHGAP18	protein_coding	3049.63	-1.48995	0.180688	-8.24601	1.63766e-16	3.52268e-15
ENSG00000093144	6	127288712	127343609	-	ECHDC1	protein_coding	1947.56	-1.59288	0.193183	-8.24544	1.64558e-16	3.53562e-15
ENSG00000130545	19	6463777	6467221	+	CRB3	protein_coding	331.953	1.69539	0.205633	8.24473	1.65533e-16	3.54835e-15
ENSG00000286028	11	111510600	111513888	+	AP002008.4	lncRNA	75.1236	-6.42061	0.778752	-8.24475	1.65506e-16	3.54835e-15
ENSG00000172840	16	66878589	66895754	+	PDP2	protein_coding	367.751	1.70516	0.206844	8.24369	1.66984e-16	3.57532e-15
ENSG00000186376	X	135248920	135344109	-	ZNF75D	protein_coding	283.377	-1.41437	0.171591	-8.24267	1.68406e-16	3.60159e-15
ENSG00000186130	9	122908056	122913323	-	ZBTB6	protein_coding	431.957	-1.87083	0.226976	-8.2424	1.68784e-16	3.60553e-15
ENSG00000196743	5	151212150	151270440	+	GM2A	protein_coding	3314.05	1.59245	0.193229	8.24125	1.70423e-16	3.63634e-15
ENSG00000168661	19	34926903	34945170	+	ZNF30	protein_coding	61.2907	-3.72435	0.45201	-8.23953	1.72889e-16	3.68472e-15
ENSG00000034693	6	143450805	143490616	+	PEX3	protein_coding	244.04	-1.94593	0.236202	-8.23843	1.7449e-16	3.71457e-15
ENSG00000145990	6	13357830	13487662	-	GFOD1	protein_coding	352.915	2.23709	0.271712	8.23331	1.82106e-16	3.87226e-15
ENSG00000112699	6	1623806	2245605	-	GMDS	protein_coding	753.28	2.52939	0.307282	8.2315	1.84882e-16	3.92677e-15
ENSG00000165309	10	22928024	23038523	+	ARMC3	protein_coding	4569.36	-1.6078	0.195397	-8.22841	1.89715e-16	4.02431e-15
ENSG00000187510	12	92702843	92772455	+	PLEKHG7	protein_coding	791.865	-1.38606	0.168451	-8.22829	1.89908e-16	4.02431e-15
ENSG00000072756	3	3126933	3150879	+	TRNT1	protein_coding	352.082	-1.54914	0.188385	-8.22329	1.97995e-16	4.19089e-15
ENSG00000185122	8	144291591	144314720	+	HSF1	protein_coding	648.857	2.31046	0.281046	8.22093	2.01935e-16	4.26941e-15
ENSG00000111276	12	12715058	12722369	+	CDKN1B	protein_coding	559.184	1.80523	0.219648	8.21873	2.05678e-16	4.3436e-15
ENSG00000143315	1	160024953	160031990	-	PIGM	protein_coding	158.289	-2.1343	0.25974	-8.21706	2.08552e-16	4.39929e-15
ENSG00000203734	6	138795911	138904070	+	ECT2L	protein_coding	1008.57	-2.17306	0.264592	-8.21286	2.15974e-16	4.55067e-15
ENSG00000286912	7	150234194	150237608	-	AC006008.1	lncRNA	45.0764	-5.29174	0.644649	-8.20871	2.23583e-16	4.70566e-15
ENSG00000142669	1	26280086	26281522	+	SH3BGRL3	protein_coding	925.116	2.47751	0.301901	8.20637	2.27984e-16	4.79283e-15
ENSG00000033327	11	78215293	78418348	-	GAB2	protein_coding	137.903	2.42905	0.296049	8.2049	2.30783e-16	4.84618e-15
ENSG00000164181	5	60751791	60844274	-	ELOVL7	protein_coding	167.177	2.75985	0.336435	8.20321	2.34051e-16	4.90925e-15
ENSG00000117984	11	1752755	1764573	-	CTSD	protein_coding	2129.33	3.27807	0.399678	8.20178	2.36855e-16	4.96244e-15
ENSG00000183665	8	124450820	124462150	+	TRMT12	protein_coding	244.413	-2.18316	0.266342	-8.19681	2.46855e-16	5.16612e-15
ENSG00000163395	1	201190824	201228952	+	IGFN1	protein_coding	149.25	10.8162	1.32053	8.19079	2.59519e-16	5.42502e-15
ENSG00000177058	5	55625845	55773194	-	SLC38A9	protein_coding	383.203	-1.92523	0.235126	-8.18809	2.65403e-16	5.54178e-15
ENSG00000109511	4	168092537	168187736	+	ANXA10	protein_coding	861.334	2.3791	0.290679	8.18462	2.73171e-16	5.69756e-15
ENSG00000110651	11	2376177	2397419	+	CD81	protein_coding	1371.79	2.51012	0.306972	8.17704	2.90898e-16	6.06048e-15
ENSG00000163435	1	202007945	202017183	+	ELF3	protein_coding	5634.63	1.80024	0.220221	8.17468	2.96651e-16	6.17341e-15
ENSG00000175591	11	73218298	73236352	+	P2RY2	protein_coding	591.404	1.8726	0.229117	8.1731	3.00562e-16	6.24777e-15
ENSG00000136689	2	113107214	113134016	+	IL1RN	protein_coding	6412.4	2.78781	0.341159	8.17158	3.04372e-16	6.3199e-15
ENSG00000105321	19	47255980	47273701	+	CCDC9	protein_coding	188.718	2.36971	0.290056	8.16982	3.08847e-16	6.40001e-15
ENSG00000119661	14	73644875	73703732	+	DNAL1	protein_coding	1410.05	-1.2012	0.147029	-8.16979	3.08921e-16	6.40001e-15
ENSG00000247095	11	565660	568457	-	MIR210HG	lncRNA	69.3097	-7.84613	0.960568	-8.16822	3.12964e-16	6.47654e-15
ENSG00000083814	19	57719751	57727624	-	ZNF671	protein_coding	95.0929	-4.57208	0.560154	-8.16218	3.29022e-16	6.78612e-15
ENSG00000163660	3	157146508	157160760	-	CCNL1	protein_coding	6061.66	1.83881	0.225283	8.16224	3.28873e-16	6.78612e-15
ENSG00000188352	9	20658309	20995955	+	FOCAD	protein_coding	3022.61	-1.43023	0.175226	-8.16222	3.28916e-16	6.78612e-15
ENSG00000123124	8	86342547	86478420	+	WWP1	protein_coding	1019.54	1.25273	0.153586	8.15655	3.44724e-16	7.10208e-15
ENSG00000165609	10	12165330	12196144	-	NUDT5	protein_coding	1206.47	-1.24612	0.152826	-8.1539	3.52382e-16	7.2518e-15
ENSG00000166596	17	9576627	9643447	+	CFAP52	protein_coding	2212.38	-1.46242	0.179362	-8.15345	3.53678e-16	7.27039e-15
ENSG00000040608	22	20241415	20283246	-	RTN4R	protein_coding	58.0842	4.6749	0.573586	8.15029	3.6305e-16	7.45478e-15
ENSG00000173039	11	65653597	65663090	-	RELA	protein_coding	561.462	2.58556	0.317275	8.14928	3.66091e-16	7.50892e-15
ENSG00000256229	19	20167214	20200488	+	ZNF486	protein_coding	193.774	-2.37972	0.292189	-8.14446	3.80976e-16	7.8056e-15
ENSG00000119684	14	75013764	75051532	-	MLH3	protein_coding	324.2	-2.45819	0.30188	-8.14291	3.85875e-16	7.89722e-15
ENSG00000166959	11	60699585	60715807	+	MS4A8	protein_coding	2687.33	-1.78686	0.219486	-8.14111	3.91673e-16	8.00706e-15
ENSG00000170629	7	103175133	103280410	-	DPY19L2P2	transcribed_unprocessed_pseudogene	314.535	-2.22903	0.273823	-8.14039	3.94014e-16	8.04605e-15
ENSG00000132388	17	4269259	4366628	-	UBE2G1	protein_coding	822.271	1.46475	0.179958	8.13944	3.9712e-16	8.10056e-15
ENSG00000102225	X	47217860	47229997	+	CDK16	protein_coding	1007.92	1.79581	0.220641	8.13904	3.98416e-16	8.11806e-15
ENSG00000148848	10	126012381	126388455	-	ADAM12	protein_coding	63.1615	-5.73521	0.70473	-8.13817	4.01307e-16	8.16799e-15
ENSG00000121039	8	73294602	73325281	+	RDH10	protein_coding	5029.58	1.61169	0.198062	8.13731	4.04159e-16	8.21702e-15
ENSG00000037749	5	154038906	154220478	+	MFAP3	protein_coding	490.925	-1.79811	0.221239	-8.12746	4.3837e-16	8.90281e-15
ENSG00000257335	7	141907813	142106747	+	MGAM	protein_coding	320.343	-3.14058	0.38649	-8.12591	4.44017e-16	9.00763e-15
ENSG00000165312	10	23439458	23442390	+	OTUD1	protein_coding	310.338	2.13788	0.263099	8.12575	4.4459e-16	9.00939e-15
ENSG00000118492	6	146598967	146815462	+	ADGB	protein_coding	1343.21	-1.70336	0.209662	-8.12434	4.49813e-16	9.10527e-15
ENSG00000143862	1	202133404	202144743	-	ARL8A	protein_coding	566.456	2.2158	0.272769	8.12337	4.53418e-16	9.16824e-15
ENSG00000136827	9	129812942	129824244	-	TOR1A	protein_coding	631.236	-1.27813	0.157368	-8.12192	4.58883e-16	9.26864e-15
ENSG00000244509	22	39014257	39020352	+	APOBEC3C	protein_coding	651.219	2.42472	0.298642	8.11916	4.69422e-16	9.47119e-15
ENSG00000099942	22	20917407	20953747	+	CRKL	protein_coding	897.37	1.94932	0.240133	8.11765	4.75288e-16	9.57911e-15
ENSG00000232040	6	28570535	28616212	-	ZBED9	protein_coding	140.064	-3.17124	0.390978	-8.11104	5.01873e-16	1.01039e-14
ENSG00000140750	16	24919389	25015666	-	ARHGAP17	protein_coding	299.587	2.01548	0.248548	8.109	5.104e-16	1.02645e-14
ENSG00000164114	4	155342658	155376970	-	MAP9	protein_coding	1583.29	-1.59109	0.196228	-8.10835	5.13129e-16	1.03082e-14
ENSG00000107614	10	17137336	17202054	-	TRDMT1	protein_coding	219.87	-1.98848	0.245563	-8.09764	5.60367e-16	1.12449e-14
ENSG00000167969	16	2239402	2252300	-	ECI1	protein_coding	449.957	1.76172	0.217677	8.09327	5.8084e-16	1.16432e-14
ENSG00000169403	1	28147166	28193936	-	PTAFR	protein_coding	1379.47	2.99677	0.370308	8.09264	5.83865e-16	1.16912e-14
ENSG00000111877	6	118813442	118935162	-	MCM9	protein_coding	181.846	-1.77025	0.218755	-8.09238	5.85076e-16	1.17028e-14
ENSG00000250803	5	122129622	122183949	+	AC010255.3	protein_coding	92.9694	-3.23106	0.399309	-8.09162	5.8874e-16	1.17634e-14
ENSG00000168528	1	31409565	31434680	+	SERINC2	protein_coding	3097.05	2.96046	0.365914	8.09058	5.93807e-16	1.18519e-14
ENSG00000129245	17	7591230	7614897	-	FXR2	protein_coding	458.511	1.55887	0.192684	8.09028	5.95263e-16	1.18681e-14
ENSG00000241127	7	39566385	39610320	+	YAE1	protein_coding	159.576	-2.89458	0.358149	-8.08205	6.36856e-16	1.26838e-14
ENSG00000143321	1	156742109	156766925	-	HDGF	protein_coding	2522.1	2.10856	0.261248	8.07112	6.96572e-16	1.38582e-14
ENSG00000117479	1	169463909	169485944	-	SLC19A2	protein_coding	595.432	1.64006	0.203296	8.06733	7.18502e-16	1.42792e-14
ENSG00000073060	12	124776856	124882668	-	SCARB1	protein_coding	180.314	3.07066	0.380681	8.06621	7.25127e-16	1.43954e-14
ENSG00000184564	13	85792790	85806683	-	SLITRK6	protein_coding	1087.98	-2.85158	0.353536	-8.06588	7.27127e-16	1.44197e-14
ENSG00000005486	7	75842602	75888926	+	RHBDD2	protein_coding	1535.12	2.10675	0.261209	8.06537	7.30121e-16	1.44636e-14
ENSG00000056972	6	111555381	111606906	-	TRAF3IP2	protein_coding	666.094	1.75231	0.217334	8.06277	7.45828e-16	1.4759e-14
ENSG00000111785	12	106774621	106889316	+	RIC8B	protein_coding	178.033	-1.97009	0.244501	-8.0576	7.78093e-16	1.5381e-14
ENSG00000175567	11	73974672	73983246	-	UCP2	protein_coding	2934.67	1.86138	0.231033	8.05674	7.83547e-16	1.54723e-14
ENSG00000138381	2	189661385	189670831	+	ASNSD1	protein_coding	222.104	-2.18618	0.271413	-8.05479	7.96128e-16	1.57041e-14
ENSG00000129465	14	24336025	24340022	-	RIPK3	protein_coding	127.875	-2.21878	0.275469	-8.05456	7.97656e-16	1.57175e-14
ENSG00000267002	17	43148368	43171037	-	AC060780.1	lncRNA	446.295	-1.72108	0.213705	-8.05356	8.04224e-16	1.58301e-14
ENSG00000205352	12	53441678	53446645	+	PRR13	protein_coding	595.904	1.42474	0.177043	8.04742	8.45576e-16	1.66264e-14
ENSG00000236699	4	105552620	105708093	+	ARHGEF38	protein_coding	418.444	-1.88004	0.23367	-8.04569	8.57575e-16	1.68444e-14
ENSG00000260710	16	1294551	1299166	-	AC120498.4	lncRNA	38.4448	8.88743	1.10466	8.04539	8.59681e-16	1.68679e-14
ENSG00000212694	12	121795267	121803906	-	LINC01089	lncRNA	60.5329	-4.36398	0.542721	-8.04092	8.91672e-16	1.74771e-14
ENSG00000198642	9	21329665	21335404	-	KLHL9	protein_coding	1659.07	-1.61622	0.201006	-8.04069	8.93369e-16	1.74919e-14
ENSG00000166263	17	54968727	55173632	+	STXBP4	protein_coding	709.082	-1.777	0.221067	-8.03828	9.11073e-16	1.78197e-14
ENSG00000102572	13	98445185	98577940	-	STK24	protein_coding	1447.63	1.92456	0.239464	8.03693	9.21172e-16	1.79983e-14
ENSG00000108828	17	43014607	43025123	-	VAT1	protein_coding	1286.08	2.49918	0.311092	8.0336	9.46568e-16	1.8475e-14
ENSG00000204304	6	32184733	32190202	-	PBX2	protein_coding	667.605	1.00899	0.125669	8.02895	9.83126e-16	1.91684e-14
ENSG00000151893	10	118674167	118755249	-	CACUL1	protein_coding	1386.02	1.22229	0.152307	8.02521	1.01353e-15	1.97404e-14
ENSG00000115484	2	61868085	61888671	-	CCT4	protein_coding	1257.55	1.12949	0.140746	8.02499	1.01537e-15	1.97555e-14
ENSG00000175582	11	73675638	73761137	-	RAB6A	protein_coding	1435.1	1.64465	0.204966	8.024	1.02357e-15	1.98942e-14
ENSG00000280162	20	1320710	1324367	+	AL136531.3	TEC	59.1763	4.07556	0.508114	8.02097	1.04915e-15	2.03699e-14
ENSG00000198060	10	92291167	92353964	+	MARCHF5	protein_coding	970.732	1.50852	0.188186	8.01611	1.09146e-15	2.11693e-14
ENSG00000198774	12	85800703	85836409	-	RASSF9	protein_coding	450.964	-2.01368	0.251222	-8.01554	1.09653e-15	2.12455e-14
ENSG00000125731	19	6752160	6767463	-	SH2D3A	protein_coding	582.364	1.79728	0.224299	8.01289	1.12041e-15	2.16855e-14
ENSG00000118096	11	118544528	118572970	-	IFT46	protein_coding	1636.47	-1.34626	0.168027	-8.01212	1.12744e-15	2.17988e-14
ENSG00000143320	1	156699606	156705816	-	CRABP2	protein_coding	2055.78	3.11128	0.388351	8.01151	1.13304e-15	2.18842e-14
ENSG00000172548	5	157460019	157474717	+	NIPAL4	protein_coding	143.374	4.20489	0.525044	8.00865	1.15976e-15	2.23769e-14
ENSG00000204564	6	30647039	30653210	+	C6orf136	protein_coding	204.217	1.93353	0.241515	8.00583	1.18664e-15	2.28718e-14
ENSG00000251537	17	15571491	15651653	-	AC005324.3	protein_coding	33.7633	-8.03742	1.00413	-8.00436	1.20089e-15	2.31224e-14
ENSG00000103275	16	1308880	1327018	+	UBE2I	protein_coding	602.931	1.71514	0.214282	8.00411	1.20334e-15	2.31455e-14
ENSG00000171469	19	9604680	9621236	-	ZNF561	protein_coding	1052.21	-1.34797	0.168469	-8.00131	1.231e-15	2.3653e-14
ENSG00000198315	6	28141883	28159460	+	ZKSCAN8	protein_coding	670.726	-2.13951	0.267408	-8.0009	1.23518e-15	2.37087e-14
ENSG00000164049	3	48372219	48401259	+	FBXW12	protein_coding	30.1061	-7.91149	0.988856	-8.00065	1.23759e-15	2.37305e-14
ENSG00000130669	19	39125770	39182816	+	PAK4	protein_coding	547.438	2.42401	0.303035	7.99911	1.25323e-15	2.40056e-14
ENSG00000083099	6	89568144	89638749	-	LYRM2	protein_coding	516.117	-1.68073	0.210148	-7.99784	1.26618e-15	2.42287e-14
ENSG00000126005	20	35201745	35278131	-	MMP24OS	protein_coding	333.362	2.24637	0.280918	7.99651	1.27992e-15	2.44662e-14
ENSG00000156232	15	82809628	82836108	+	WHAMM	protein_coding	265.601	2.32706	0.291101	7.99398	1.3065e-15	2.49486e-14
ENSG00000141076	16	69131291	69231130	+	UTP4	protein_coding	557.347	-1.78772	0.223658	-7.99308	1.31612e-15	2.51065e-14
ENSG00000002587	4	11393150	11429564	-	HS3ST1	protein_coding	531.145	2.51288	0.314449	7.99137	1.33446e-15	2.54301e-14
ENSG00000278493	15	41908204	41908714	-	AC039056.2	lncRNA	35.6054	6.38298	0.798884	7.98987	1.35084e-15	2.57159e-14
ENSG00000130202	19	44846175	44889223	+	NECTIN2	protein_coding	990.085	2.96568	0.371283	7.98764	1.3755e-15	2.61586e-14
ENSG00000118515	6	134169246	134318112	-	SGK1	protein_coding	3905.01	-2.40285	0.301044	-7.98172	1.44313e-15	2.74166e-14
ENSG00000119401	9	116687302	116701300	+	TRIM32	protein_coding	390.814	-2.1232	0.266043	-7.98067	1.45544e-15	2.76221e-14
ENSG00000081386	9	96755865	96778129	-	ZNF510	protein_coding	274.79	-2.36641	0.296543	-7.97999	1.46345e-15	2.77456e-14
ENSG00000153292	6	46997708	47042350	-	ADGRF1	protein_coding	10864.6	-1.59441	0.199827	-7.97896	1.47574e-15	2.79502e-14
ENSG00000137094	9	34989641	34998900	+	DNAJB5	protein_coding	315.035	2.85343	0.357717	7.97676	1.50223e-15	2.84228e-14
ENSG00000130159	19	11505929	11529172	-	ECSIT	protein_coding	182.335	2.06179	0.258481	7.97655	1.50484e-15	2.84432e-14
ENSG00000174437	12	110280756	110351093	+	ATP2A2	protein_coding	6002.4	1.5186	0.19039	7.97629	1.50796e-15	2.84731e-14
ENSG00000285972	10	84167228	84172093	-	CERNA2	lncRNA	184.673	-4.25515	0.533629	-7.97398	1.53641e-15	2.89807e-14
ENSG00000127720	12	82358528	82479239	+	METTL25	protein_coding	83.1806	-2.36419	0.296618	-7.97049	1.58048e-15	2.97818e-14
ENSG00000129355	19	10566460	10569059	-	CDKN2D	protein_coding	186.653	3.07051	0.385291	7.96933	1.5954e-15	3.00019e-14
ENSG00000135862	1	183023420	183145592	+	LAMC1	protein_coding	1547.84	2.11742	0.265695	7.96936	1.59497e-15	3.00019e-14
ENSG00000142657	1	10398592	10420511	+	PGD	protein_coding	7244.85	1.30534	0.163836	7.96735	1.62111e-15	3.04545e-14
ENSG00000158615	1	204403381	204411817	-	PPP1R15B	protein_coding	988.297	1.48801	0.186817	7.96507	1.65136e-15	3.09915e-14
ENSG00000158467	7	129225023	129430211	+	AHCYL2	protein_coding	1209.68	1.10911	0.139281	7.96315	1.6772e-15	3.14445e-14
ENSG00000067057	10	3066333	3137718	+	PFKP	protein_coding	1343.73	2.41532	0.30343	7.96006	1.71961e-15	3.22071e-14
ENSG00000272374	6	35220370	35224630	-	Z97832.2	lncRNA	34.2662	-8.14912	1.02378	-7.95981	1.72305e-15	3.22389e-14
ENSG00000156239	21	28872191	28885371	-	N6AMT1	protein_coding	356.1	-1.93708	0.243372	-7.95933	1.72977e-15	3.23321e-14
ENSG00000070423	19	647526	663233	-	RNF126	protein_coding	340.873	2.17525	0.273346	7.95786	1.75038e-15	3.26844e-14
ENSG00000280128	6	30282349	30286054	-	AL662795.2	TEC	161.971	-4.32527	0.543545	-7.95752	1.75525e-15	3.27422e-14
ENSG00000128283	22	37560480	37569405	+	CDC42EP1	protein_coding	240.102	3.00685	0.378034	7.95392	1.80707e-15	3.3675e-14
ENSG00000143398	1	151197949	151249536	+	PIP5K1A	protein_coding	1230.96	1.28551	0.161704	7.94974	1.869e-15	3.47942e-14
ENSG00000135521	6	143843338	143863812	+	LTV1	protein_coding	177.083	-1.88323	0.236987	-7.94655	1.91784e-15	3.56676e-14
ENSG00000160789	1	156082573	156140089	+	LMNA	protein_coding	2510.69	2.09151	0.263246	7.94506	1.94093e-15	3.60609e-14
ENSG00000231057	1	211675749	211690103	+	AC096637.3	lncRNA	233.852	-2.76034	0.34744	-7.94481	1.94487e-15	3.60978e-14
ENSG00000171135	3	9890574	9894349	+	JAGN1	protein_coding	372.451	-1.36017	0.171239	-7.94308	1.97227e-15	3.65699e-14
ENSG00000197037	7	99616946	99632408	+	ZSCAN25	protein_coding	175.574	-1.85058	0.233143	-7.9375	2.06303e-15	3.82145e-14
ENSG00000167447	17	59209400	59215247	+	SMG8	protein_coding	242.88	-2.41908	0.304775	-7.93726	2.06699e-15	3.82497e-14
ENSG00000166261	11	123723914	123741675	-	ZNF202	protein_coding	171.191	-2.04817	0.258076	-7.9363	2.08302e-15	3.85078e-14
ENSG00000198899	MT	8527	9207	+	MT-ATP6	protein_coding	54797.8	-1.49035	0.187945	-7.9297	2.1967e-15	4.0569e-14
ENSG00000126858	17	32142454	32253374	+	RHOT1	protein_coding	667.865	1.21635	0.153404	7.92904	2.20846e-15	4.07456e-14
ENSG00000203880	20	64255695	64287821	+	PCMTD2	protein_coding	1012.19	-1.15943	0.146233	-7.92864	2.21553e-15	4.08353e-14
ENSG00000113966	3	97764521	97801229	+	ARL6	protein_coding	827.437	-1.8416	0.23228	-7.92838	2.22027e-15	4.08809e-14
ENSG00000246067	11	83072052	83107789	+	RAB30-DT	lncRNA	113.053	-3.75543	0.473676	-7.92826	2.22241e-15	4.08809e-14
ENSG00000112972	5	43287470	43313512	-	HMGCS1	protein_coding	5124.31	2.45233	0.309653	7.91961	2.38251e-15	4.37824e-14
ENSG00000243836	7	151409161	151413354	+	WDR86-AS1	lncRNA	886.072	-2.04267	0.25795	-7.91885	2.39714e-15	4.40077e-14
ENSG00000189334	1	153614255	153616986	-	S100A14	protein_coding	12190.8	3.02746	0.382337	7.91832	2.40746e-15	4.41535e-14
ENSG00000118898	16	4882507	4960741	-	PPL	protein_coding	3607.1	2.52402	0.318763	7.91817	2.41036e-15	4.4163e-14
ENSG00000167740	17	4143168	4187310	+	CYB5D2	protein_coding	318.249	-1.56108	0.197185	-7.9168	2.43704e-15	4.45826e-14
ENSG00000171425	19	55635459	55645623	+	ZNF581	protein_coding	122.495	2.11392	0.267018	7.91675	2.43807e-15	4.45826e-14
ENSG00000155100	8	91070196	91087095	+	OTUD6B	protein_coding	333.206	-1.62029	0.204745	-7.91372	2.49809e-15	4.56351e-14
ENSG00000166012	11	93729948	93784391	-	TAF1D	protein_coding	1411.18	1.48637	0.187829	7.91341	2.50434e-15	4.57042e-14
ENSG00000161013	5	179797597	179806952	-	MGAT4B	protein_coding	1014.35	2.22978	0.281797	7.9127	2.51876e-15	4.59221e-14
ENSG00000237440	19	20535825	20565809	-	ZNF737	protein_coding	254.475	-2.09533	0.264845	-7.91153	2.54235e-15	4.63066e-14
ENSG00000105287	19	46674275	46717127	-	PRKD2	protein_coding	670.488	2.00902	0.253953	7.91098	2.55368e-15	4.64674e-14
ENSG00000100650	14	69726900	69772005	+	SRSF5	protein_coding	5126.43	-1.38653	0.175366	-7.9065	2.64734e-15	4.81245e-14
ENSG00000165272	9	33441156	33447596	-	AQP3	protein_coding	9765.34	2.38853	0.302231	7.90299	2.72284e-15	4.94484e-14
ENSG00000221869	8	47736913	47738164	-	CEBPD	protein_coding	1383.19	2.51746	0.318573	7.90231	2.73787e-15	4.96728e-14
ENSG00000180938	8	124973295	124979389	+	ZNF572	protein_coding	39.8122	-5.96682	0.755475	-7.8981	2.83193e-15	5.13291e-14
ENSG00000256683	19	51964340	51986856	-	ZNF350	protein_coding	168.343	-2.67986	0.33937	-7.89658	2.86656e-15	5.19061e-14
ENSG00000151366	11	78068297	78079862	-	NDUFC2	protein_coding	136.533	-2.19378	0.277935	-7.89315	2.94644e-15	5.33005e-14
ENSG00000143369	1	150508062	150513789	+	ECM1	protein_coding	1071.49	4.98409	0.631525	7.89215	2.97013e-15	5.36766e-14
ENSG00000075188	12	102073103	102120120	-	NUP37	protein_coding	343.475	-1.73694	0.220147	-7.8899	3.02435e-15	5.46032e-14
ENSG00000143353	1	219173869	219212865	+	LYPLAL1	protein_coding	333.303	-1.74896	0.221937	-7.88044	3.26219e-15	5.88401e-14
ENSG00000185100	14	104724186	104747325	+	ADSS1	protein_coding	545.141	2.65147	0.336549	7.8784	3.31595e-15	5.97516e-14
ENSG00000140988	16	1962058	1964841	-	RPS2	protein_coding	12705.4	1.8958	0.240661	7.87749	3.34028e-15	6.01315e-14
ENSG00000144736	3	72749277	72861914	-	SHQ1	protein_coding	529.749	-1.45837	0.185214	-7.87396	3.43601e-15	6.17949e-14
ENSG00000166821	15	89677764	89690783	-	PEX11A	protein_coding	326.802	-2.07884	0.264084	-7.87188	3.49358e-15	6.27694e-14
ENSG00000040275	5	169583636	169604778	+	SPDL1	protein_coding	270.866	-2.68713	0.34138	-7.87137	3.50783e-15	6.29644e-14
ENSG00000119392	9	128504700	128542288	+	GLE1	protein_coding	777.826	-1.67169	0.21242	-7.86974	3.55377e-15	6.37273e-14
ENSG00000149187	11	47465933	47565569	-	CELF1	protein_coding	1971.25	1.00507	0.127754	7.86719	3.62704e-15	6.49784e-14
ENSG00000204592	6	30489509	30494194	+	HLA-E	protein_coding	4261.15	1.50376	0.191343	7.85897	3.87301e-15	6.93178e-14
ENSG00000117000	1	40161387	40240921	+	RLF	protein_coding	726.474	-1.90877	0.242891	-7.85855	3.88611e-15	6.94853e-14
ENSG00000139132	12	32399529	32646050	+	FGD4	protein_coding	542.802	1.24083	0.157932	7.85673	3.94303e-15	7.04351e-14
ENSG00000172939	3	38165089	38255484	+	OXSR1	protein_coding	755.386	1.45618	0.185444	7.85239	4.08186e-15	7.27858e-14
ENSG00000275888	17	82244770	82245591	+	AC132872.3	lncRNA	59.5943	3.34924	0.426526	7.85237	4.08247e-15	7.27858e-14
ENSG00000141568	17	82519713	82644662	+	FOXK2	protein_coding	518.553	1.36448	0.173786	7.85149	4.11121e-15	7.32278e-14
ENSG00000106701	9	105447796	105552433	+	FSD1L	protein_coding	339.976	-1.80124	0.229453	-7.85014	4.15566e-15	7.39484e-14
ENSG00000078142	18	41955234	42087830	+	PIK3C3	protein_coding	1295.76	-1.35277	0.17233	-7.84989	4.16396e-15	7.4025e-14
ENSG00000187790	14	45135930	45200890	+	FANCM	protein_coding	151.633	-2.43914	0.31077	-7.8487	4.20371e-15	7.46602e-14
ENSG00000005884	17	50055968	50090481	+	ITGA3	protein_coding	3758.72	2.0384	0.259784	7.84651	4.2777e-15	7.59015e-14
ENSG00000140961	16	83931311	83966332	+	OSGIN1	protein_coding	232.897	2.85825	0.364285	7.8462	4.28836e-15	7.6018e-14
ENSG00000104976	19	7920338	7923250	+	SNAPC2	protein_coding	118.296	2.75037	0.350645	7.84375	4.37282e-15	7.7441e-14
ENSG00000179361	15	74541177	74598131	+	ARID3B	protein_coding	191.317	2.33691	0.297984	7.8424	4.42009e-15	7.82035e-14
ENSG00000085831	1	51287258	51345116	-	TTC39A	protein_coding	416.41	1.75801	0.224185	7.84178	4.44192e-15	7.85148e-14
ENSG00000180881	12	75275979	75390928	-	CAPS2	protein_coding	1207.11	-1.80343	0.230012	-7.8406	4.48409e-15	7.91847e-14
ENSG00000118322	5	160563120	160852214	-	ATP10B	protein_coding	2708.62	-1.64818	0.210251	-7.83909	4.53819e-15	8.00639e-14
ENSG00000029993	X	150980509	150990771	+	HMGB3	protein_coding	1069.24	-1.55171	0.198012	-7.83646	4.63435e-15	8.16827e-14
ENSG00000118263	2	207074137	207167267	-	KLF7	protein_coding	731.45	1.92849	0.246147	7.83469	4.69999e-15	8.27608e-14
ENSG00000104695	8	30774457	30814314	-	PPP2CB	protein_coding	1861.81	1.11337	0.142119	7.83407	4.7234e-15	8.30942e-14
ENSG00000186007	1	205381378	205455954	-	LEMD1	protein_coding	110.303	3.69284	0.471436	7.83317	4.75732e-15	8.36117e-14
ENSG00000133315	11	63998558	64166113	-	MACROD1	protein_coding	218.222	1.95462	0.249537	7.83299	4.76403e-15	8.36503e-14
ENSG00000100644	14	61695513	61748259	+	HIF1A	protein_coding	8528.8	1.39851	0.178643	7.82851	4.93682e-15	8.66022e-14
ENSG00000130158	19	11199295	11262524	-	DOCK6	protein_coding	555.182	2.04168	0.260974	7.8233	5.14545e-15	9.01767e-14
ENSG00000164897	7	151081085	151083493	-	TMUB1	protein_coding	299.472	1.8791	0.240243	7.82164	5.21408e-15	9.12931e-14
ENSG00000182329	2	202073255	202205188	+	KIAA2012	protein_coding	735.325	-1.37725	0.176087	-7.82144	5.22227e-15	9.13503e-14
ENSG00000159208	1	150282543	150287093	+	CIART	protein_coding	220.88	1.98812	0.25424	7.81985	5.28858e-15	9.24231e-14
ENSG00000124226	20	49936336	49953885	+	RNF114	protein_coding	885.635	1.88147	0.24081	7.81311	5.57941e-15	9.74138e-14
ENSG00000188868	19	12317477	12333720	-	ZNF563	protein_coding	82.9768	-2.68712	0.344126	-7.80852	5.78623e-15	1.0093e-13
ENSG00000176641	18	61808067	61894247	-	RNF152	protein_coding	603.106	1.78744	0.228978	7.80617	5.89516e-15	1.02733e-13
ENSG00000114473	3	197889077	197960142	-	IQCG	protein_coding	4200.93	-1.56063	0.19995	-7.80508	5.94638e-15	1.03528e-13
ENSG00000101639	18	12991362	13125052	+	CEP192	protein_coding	1068.94	-1.50886	0.193406	-7.80151	6.11728e-15	1.06404e-13
ENSG00000159023	1	28887091	29120046	+	EPB41	protein_coding	714.981	1.24836	0.160122	7.79632	6.37389e-15	1.10764e-13
ENSG00000143971	2	67397322	67412089	+	ETAA1	protein_coding	340.63	-1.66971	0.214242	-7.79358	6.51352e-15	1.13084e-13
ENSG00000166578	12	113195441	113221094	-	IQCD	protein_coding	642.524	-1.42814	0.183266	-7.79274	6.5571e-15	1.13734e-13
ENSG00000064933	2	189784085	189877629	+	PMS1	protein_coding	476.916	-1.56169	0.200408	-7.79258	6.56561e-15	1.13775e-13
ENSG00000065491	6	37257772	37332970	+	TBC1D22B	protein_coding	411.092	1.59914	0.205411	7.78507	6.9673e-15	1.20551e-13
ENSG00000228634	1	31933020	31933975	+	AL136115.1	lncRNA	50.5691	4.37162	0.561541	7.78503	6.96964e-15	1.20551e-13
ENSG00000231738	12	85014311	85036277	-	TSPAN19	protein_coding	1106.8	-1.91936	0.246739	-7.7789	7.31567e-15	1.26419e-13
ENSG00000154114	11	121024072	121090775	+	TBCEL	protein_coding	488.773	-1.10972	0.142704	-7.77637	7.46349e-15	1.28853e-13
ENSG00000029363	6	136256627	136289851	-	BCLAF1	protein_coding	4535.14	-1.49346	0.192069	-7.77563	7.50752e-15	1.29493e-13
ENSG00000186591	7	129830732	129952960	-	UBE2H	protein_coding	2754.25	2.23929	0.287997	7.77538	7.52196e-15	1.29621e-13
ENSG00000256087	19	52031378	52095738	-	ZNF432	protein_coding	631.013	-1.43582	0.184668	-7.77514	7.53632e-15	1.29748e-13
ENSG00000198521	19	21804949	21852125	-	ZNF43	protein_coding	228.645	-1.8603	0.239327	-7.77304	7.66266e-15	1.31801e-13
ENSG00000127954	7	88270892	88306891	-	STEAP4	protein_coding	1544.79	-1.95167	0.251096	-7.77263	7.68758e-15	1.32107e-13
ENSG00000186666	12	49836043	49843106	-	BCDIN3D	protein_coding	49.8255	-3.70037	0.476232	-7.77012	7.84149e-15	1.34627e-13
ENSG00000181634	9	114784652	114806039	-	TNFSF15	protein_coding	59.8905	-7.9529	1.02359	-7.76959	7.87431e-15	1.35065e-13
ENSG00000253671	8	17808361	17822183	+	AC027117.1	lncRNA	258.049	-2.38317	0.306831	-7.76704	8.03398e-15	1.37677e-13
ENSG00000167637	19	43827321	43852017	+	ZNF283	protein_coding	144.683	-1.66463	0.214448	-7.7624	8.33384e-15	1.42683e-13
ENSG00000127616	19	10960825	11079426	+	SMARCA4	protein_coding	1449.07	2.05739	0.265102	7.76074	8.44352e-15	1.44336e-13
ENSG00000184557	17	78356778	78360077	-	SOCS3	protein_coding	220.521	3.80461	0.490241	7.7607	8.44596e-15	1.44336e-13
ENSG00000175928	3	3799431	3849834	+	LRRN1	protein_coding	357.9	-3.13509	0.403984	-7.76045	8.46309e-15	1.44496e-13
ENSG00000213085	1	159872364	159900165	-	CFAP45	protein_coding	2390.42	-1.27215	0.163932	-7.76019	8.48e-15	1.44651e-13
ENSG00000119321	9	113161006	113221318	-	FKBP15	protein_coding	1422.86	-1.18764	0.153173	-7.7536	8.93222e-15	1.52225e-13
ENSG00000115756	2	10302889	10427617	+	HPCAL1	protein_coding	76.1951	2.49521	0.321853	7.75265	8.99959e-15	1.53092e-13
ENSG00000120742	3	150541998	150603228	-	SERP1	protein_coding	2907.41	0.970304	0.125156	7.75275	8.99211e-15	1.53092e-13
ENSG00000074964	1	17539698	17697874	+	ARHGEF10L	protein_coding	949.084	2.35538	0.303927	7.74981	9.20319e-15	1.56412e-13
ENSG00000253313	1	43281877	43285617	-	C1orf210	protein_coding	245.509	2.37406	0.30652	7.7452	9.5432e-15	1.62042e-13
ENSG00000197168	13	52033611	52129092	-	NEK5	protein_coding	951.365	-1.71908	0.222073	-7.74108	9.85778e-15	1.67231e-13
ENSG00000196152	9	127424374	127445372	+	ZNF79	protein_coding	54.5106	-3.2924	0.425332	-7.74079	9.88004e-15	1.67455e-13
ENSG00000173599	11	66848417	66958386	-	PC	protein_coding	294.325	2.33472	0.301687	7.7389	1.00279e-14	1.69805e-13
ENSG00000120910	8	22440819	22541142	+	PPP3CC	protein_coding	470.478	1.75763	0.227293	7.73285	1.05166e-14	1.77918e-13
ENSG00000086200	5	62403972	62628582	+	IPO11	protein_coding	712.331	-1.46582	0.189587	-7.73165	1.06163e-14	1.79442e-13
ENSG00000255302	15	48878134	48880173	+	EID1	protein_coding	2515.89	-1.34347	0.173826	-7.72881	1.08553e-14	1.83315e-13
ENSG00000125835	20	2461634	2470853	-	SNRPB	protein_coding	641.866	1.27462	0.164925	7.72848	1.08839e-14	1.83631e-13
ENSG00000092068	14	23125295	23183674	-	SLC7A8	protein_coding	233.985	3.00426	0.388898	7.72507	1.11792e-14	1.88441e-13
ENSG00000126814	14	60971441	60981170	-	TRMT5	protein_coding	292.222	-1.94955	0.252404	-7.72394	1.12785e-14	1.89868e-13
ENSG00000166848	16	75647773	75761872	+	TERF2IP	protein_coding	465.274	2.18271	0.282592	7.72388	1.12844e-14	1.89868e-13
ENSG00000284977	9	117759455	117879988	+	AL160272.1	lncRNA	102.563	-4.95553	0.641688	-7.72265	1.13937e-14	1.91533e-13
ENSG00000185043	15	90229975	90234047	-	CIB1	protein_coding	4202.9	1.06584	0.138017	7.72252	1.1405e-14	1.91551e-13
ENSG00000163214	2	38797729	38875934	-	DHX57	protein_coding	894.263	-1.20326	0.155858	-7.72025	1.16102e-14	1.94821e-13
ENSG00000166508	7	100092728	100101940	-	MCM7	protein_coding	451.753	-1.90517	0.246882	-7.71691	1.19181e-14	1.99805e-13
ENSG00000189283	3	59747277	61251459	-	FHIT	protein_coding	111.966	2.12721	0.275765	7.71387	1.22061e-14	2.04449e-13
ENSG00000247626	2	197705369	197708395	+	MARS2	protein_coding	156.901	-1.82055	0.236116	-7.71041	1.25412e-14	2.09872e-13
ENSG00000197935	6	28994785	29005316	-	ZNF311	protein_coding	55.3976	-4.16941	0.540855	-7.70892	1.26888e-14	2.12151e-13
ENSG00000064666	19	1026586	1039068	+	CNN2	protein_coding	1078.81	2.89887	0.376148	7.70673	1.29085e-14	2.1563e-13
ENSG00000132170	3	12287368	12434356	+	PPARG	protein_coding	279.182	2.5503	0.330948	7.70605	1.29776e-14	2.1659e-13
ENSG00000196652	7	99504651	99534700	+	ZKSCAN5	protein_coding	271.128	-1.50318	0.195117	-7.70402	1.31849e-14	2.19851e-13
ENSG00000133665	10	80344745	80368073	+	DYDC2	protein_coding	1395.02	-1.52406	0.197948	-7.69927	1.3685e-14	2.27986e-13
ENSG00000182831	16	9091644	9121635	+	C16orf72	protein_coding	1019.28	1.62087	0.210549	7.69831	1.37875e-14	2.29486e-13
ENSG00000276600	1	205976740	206003461	-	RAB7B	protein_coding	260.509	-3.08004	0.400228	-7.69571	1.4071e-14	2.33996e-13
ENSG00000146197	6	35213956	35253079	+	SCUBE3	protein_coding	55.0463	-5.05038	0.656276	-7.69551	1.40927e-14	2.34146e-13
ENSG00000102119	X	154379273	154381523	+	EMD	protein_coding	241.696	2.70735	0.351859	7.69443	1.42127e-14	2.35928e-13
ENSG00000119703	14	75064109	75119502	+	ZC2HC1C	protein_coding	431.294	-2.06119	0.268062	-7.68923	1.48028e-14	2.45504e-13
ENSG00000185869	19	36888124	36916291	-	ZNF829	protein_coding	66.0671	-2.88652	0.375448	-7.68819	1.49229e-14	2.47274e-13
ENSG00000166192	15	72114258	72143692	+	SENP8	protein_coding	90.7798	-3.31415	0.431293	-7.68423	1.53918e-14	2.54816e-13
ENSG00000171124	19	5842888	5851474	-	FUT3	protein_coding	1521.56	2.23001	0.290309	7.68151	1.57222e-14	2.60054e-13
ENSG00000186187	16	74999024	75110994	+	ZNRF1	protein_coding	332.712	1.71254	0.223011	7.67918	1.60114e-14	2.64603e-13
ENSG00000158470	20	49632945	49713878	-	B4GALT5	protein_coding	3955.84	2.93956	0.382818	7.67875	1.60652e-14	2.65255e-13
ENSG00000072518	11	63838928	63911019	+	MARK2	protein_coding	790.475	1.81012	0.235747	7.67821	1.61332e-14	2.66141e-13
ENSG00000198131	19	58228594	58277495	+	ZNF544	protein_coding	364.868	-2.01047	0.261869	-7.67738	1.62379e-14	2.6763e-13
ENSG00000165006	9	34179005	34252523	+	UBAP1	protein_coding	817.311	1.73677	0.226236	7.67683	1.6307e-14	2.68529e-13
ENSG00000164929	8	103140713	103230305	+	BAALC	protein_coding	222.082	-3.33447	0.43448	-7.67462	1.65915e-14	2.72971e-13
ENSG00000051620	6	138403531	138422197	+	HEBP2	protein_coding	1723.06	1.15565	0.150586	7.67433	1.66279e-14	2.73329e-13
ENSG00000159128	21	33402896	33479348	+	IFNGR2	protein_coding	1407.18	1.68935	0.22014	7.67396	1.66766e-14	2.73886e-13
ENSG00000149418	11	130159782	130210362	+	ST14	protein_coding	2495.84	2.59528	0.338247	7.67273	1.68373e-14	2.76281e-13
ENSG00000147394	X	152914442	152973480	+	ZNF185	protein_coding	1459.11	2.29684	0.299359	7.67253	1.68638e-14	2.76417e-13
ENSG00000162522	1	32741830	32774970	+	KIAA1522	protein_coding	3859.19	2.0929	0.272781	7.67244	1.68754e-14	2.76417e-13
ENSG00000196659	2	177548998	177552796	-	TTC30B	protein_coding	429.174	-1.92228	0.250695	-7.66783	1.74933e-14	2.86284e-13
ENSG00000135018	9	83659968	83707958	-	UBQLN1	protein_coding	1470.45	1.54689	0.201744	7.66757	1.75279e-14	2.86598e-13
ENSG00000091732	7	130018287	130051451	-	ZC3HC1	protein_coding	110.494	-2.857	0.372722	-7.66524	1.78503e-14	2.91613e-13
ENSG00000186529	19	15640897	15662825	+	CYP4F3	protein_coding	509.805	2.28304	0.297953	7.66242	1.82459e-14	2.97813e-13
ENSG00000164754	8	116845934	116874776	-	RAD21	protein_coding	1702.52	1.01683	0.13278	7.65803	1.88808e-14	3.07905e-13
ENSG00000137547	8	54135241	54148514	+	MRPL15	protein_coding	694.399	-1.62473	0.21227	-7.65405	1.94741e-14	3.17301e-13
ENSG00000055147	5	153990148	154038936	-	FAM114A2	protein_coding	390.413	-1.60176	0.209331	-7.65179	1.98202e-14	3.2248e-13
ENSG00000143878	2	20447074	20449440	+	RHOB	protein_coding	561.441	3.25101	0.424871	7.65175	1.98267e-14	3.2248e-13
ENSG00000115993	2	201377207	201451500	-	TRAK2	protein_coding	1089.29	-1.62514	0.212445	-7.64968	2.01472e-14	3.27406e-13
ENSG00000011258	17	51177425	51260163	-	MBTD1	protein_coding	352.408	-1.63269	0.21346	-7.6487	2.03028e-14	3.29645e-13
ENSG00000212916	1	232804892	232808407	+	MAP10	protein_coding	53.6819	-4.40216	0.575608	-7.64784	2.04382e-14	3.31553e-13
ENSG00000133985	14	70641916	70675366	+	TTC9	protein_coding	1823.22	2.98214	0.390294	7.64075	2.15956e-14	3.50023e-13
ENSG00000180917	16	71281389	71289715	-	CMTR2	protein_coding	806.373	-1.43063	0.187279	-7.63901	2.18901e-14	3.54487e-13
ENSG00000185261	5	94152966	94618597	-	KIAA0825	protein_coding	311.274	-1.98886	0.260478	-7.63544	2.25053e-14	3.64131e-13
ENSG00000175390	11	7970251	8001862	+	EIF3F	protein_coding	1011.14	1.96375	0.257206	7.63494	2.25925e-14	3.65223e-13
ENSG00000197013	19	21496682	21556270	+	ZNF429	protein_coding	361.835	-2.0921	0.274094	-7.63277	2.29758e-14	3.71096e-13
ENSG00000156639	6	37819727	38154624	+	ZFAND3	protein_coding	918.487	2.18102	0.285785	7.63169	2.31694e-14	3.73588e-13
ENSG00000213742	20	25624045	25689032	+	ZNF337-AS1	lncRNA	54.3558	-3.75691	0.492278	-7.63169	2.31704e-14	3.73588e-13
ENSG00000158234	3	138608606	138633376	+	FAIM	protein_coding	323.818	-1.83341	0.240289	-7.63003	2.34706e-14	3.781e-13
ENSG00000231064	1	155195004	155205495	+	AC234582.1	lncRNA	46.0229	-3.86418	0.506607	-7.62757	2.39211e-14	3.85022e-13
ENSG00000156453	5	141853111	141879246	-	PCDH1	protein_coding	1063.84	2.56106	0.335933	7.62372	2.46461e-14	3.96347e-13
ENSG00000121900	1	32894594	32901438	-	TMEM54	protein_coding	290.724	2.62936	0.344968	7.62204	2.49699e-14	4.01206e-13
ENSG00000100439	14	22598237	22613215	+	ABHD4	protein_coding	743.912	1.25809	0.165085	7.62084	2.52029e-14	4.04599e-13
ENSG00000104964	19	3052910	3063107	-	TLE5	protein_coding	2744.51	1.36431	0.179034	7.62038	2.5293e-14	4.05695e-13
ENSG00000159885	19	44025342	44033110	+	ZNF222	protein_coding	39.9077	-4.60866	0.605053	-7.61695	2.59741e-14	4.16259e-13
ENSG00000280187	5	69186359	69189452	-	AC022107.1	TEC	79.74	-2.55531	0.335651	-7.613	2.67801e-14	4.28805e-13
ENSG00000224689	19	9689924	9700776	-	ZNF812P	transcribed_unprocessed_pseudogene	410.622	-3.35937	0.441385	-7.61098	2.72033e-14	4.35206e-13
ENSG00000096060	6	35573585	35728583	-	FKBP5	protein_coding	268.929	1.84578	0.24253	7.61053	2.72978e-14	4.36341e-13
ENSG00000171428	8	18170477	18223689	+	NAT1	protein_coding	868.61	-1.25742	0.165259	-7.60875	2.76755e-14	4.41997e-13
ENSG00000223768	21	45288050	45297806	+	LINC00205	lncRNA	130.979	-2.62578	0.345255	-7.60532	2.84205e-14	4.53505e-13
ENSG00000104419	8	133237171	133302022	-	NDRG1	protein_coding	5828.88	2.67859	0.352293	7.60332	2.88626e-14	4.59833e-13
ENSG00000119669	14	77024543	77028708	-	IRF2BPL	protein_coding	430.17	2.85324	0.375269	7.60319	2.88914e-14	4.59833e-13
ENSG00000143614	1	153789030	153923360	-	GATAD2B	protein_coding	310.123	1.68415	0.221505	7.60321	2.88867e-14	4.59833e-13
ENSG00000274026	9	67717411	67719178	-	FAM27E3	lncRNA	45.9863	-4.1376	0.544323	-7.60136	2.93025e-14	4.65975e-13
ENSG00000168476	8	22138020	22141951	-	REEP4	protein_coding	410.907	2.24908	0.296018	7.59776	3.01296e-14	4.78718e-13
ENSG00000184860	16	81988855	82011481	-	SDR42E1	protein_coding	480.866	-1.83527	0.241574	-7.59714	3.02753e-14	4.80621e-13
ENSG00000164916	7	4682295	4771442	+	FOXK1	protein_coding	570.532	1.84999	0.243564	7.59549	3.06623e-14	4.86348e-13
ENSG00000172086	2	88027205	88064252	-	KRCC1	protein_coding	1018.19	-1.60669	0.21163	-7.59197	3.15083e-14	4.99338e-13
ENSG00000162775	1	110338506	110346681	+	RBM15	protein_coding	238.778	1.43653	0.189245	7.59087	3.17766e-14	5.03161e-13
ENSG00000164002	1	40508741	40516556	+	EXO5	protein_coding	33.05	-5.06417	0.667183	-7.59038	3.18975e-14	5.04645e-13
ENSG00000276023	17	37489891	37513501	+	DUSP14	protein_coding	1065.69	-1.52776	0.20128	-7.5902	3.19402e-14	5.0489e-13
ENSG00000159314	17	45393902	45434421	-	ARHGAP27	protein_coding	864.036	1.76845	0.233042	7.58856	3.23478e-14	5.10898e-13
ENSG00000168876	11	94493979	94499578	+	ANKRD49	protein_coding	358.394	-2.03537	0.268244	-7.58777	3.25457e-14	5.13585e-13
ENSG00000176273	10	93893973	93956062	+	SLC35G1	protein_coding	95.2755	-2.0573	0.271151	-7.58732	3.26598e-14	5.14947e-13
ENSG00000162994	2	55172547	55232563	-	CLHC1	protein_coding	449.097	-1.63987	0.216251	-7.58319	3.37155e-14	5.31141e-13
ENSG00000185000	8	144314584	144326910	-	DGAT1	protein_coding	441.345	1.4937	0.196989	7.58263	3.38619e-14	5.32995e-13
ENSG00000018510	2	177392757	177559299	+	AGPS	protein_coding	1293.57	-1.02243	0.134858	-7.58151	3.41553e-14	5.36866e-13
ENSG00000171552	20	31664452	31723989	-	BCL2L1	protein_coding	1934.98	1.89242	0.249612	7.58147	3.41658e-14	5.36866e-13
ENSG00000260565	16	2660348	2682379	-	ERVK13-1	lncRNA	440.228	-1.80885	0.238613	-7.58069	3.4372e-14	5.39649e-13
ENSG00000120925	8	42849637	42897290	-	RNF170	protein_coding	427.553	-1.44363	0.190441	-7.58047	3.44307e-14	5.40114e-13
ENSG00000101224	20	3786772	3806121	+	CDC25B	protein_coding	329.823	1.9685	0.259751	7.57838	3.4989e-14	5.48407e-13
ENSG00000175265	15	34379068	34437466	-	GOLGA8A	protein_coding	647.296	-1.7999	0.23769	-7.57244	3.6627e-14	5.73596e-13
ENSG00000261490	4	10068089	10073019	-	AC005674.2	lncRNA	27.2726	-7.74857	1.02338	-7.57158	3.68704e-14	5.7692e-13
ENSG00000204815	17	41930617	41966503	+	TTC25	protein_coding	1703.52	-1.65425	0.218547	-7.56929	3.75277e-14	5.8671e-13
ENSG00000170325	11	129899706	130002835	-	PRDM10	protein_coding	295.313	1.66692	0.220375	7.56401	3.90822e-14	6.10498e-13
ENSG00000140259	15	43804492	43824690	-	MFAP1	protein_coding	1194.71	-1.72419	0.227957	-7.56366	3.91886e-14	6.11645e-13
ENSG00000279806	17	40473554	40475289	-	AC018629.1	TEC	91.487	-4.65314	0.615252	-7.56298	3.93934e-14	6.14326e-13
ENSG00000247556	15	41283990	41309737	+	OIP5-AS1	lncRNA	3688.96	0.846702	0.111997	7.56001	4.03024e-14	6.27972e-13
ENSG00000076258	1	171314183	171342084	+	FMO4	protein_coding	374.081	-1.85114	0.244891	-7.55907	4.05976e-14	6.32041e-13
ENSG00000165178	7	75156639	75172044	-	NCF1C	unprocessed_pseudogene	48.5615	5.03479	0.666151	7.55802	4.0925e-14	6.36604e-13
ENSG00000148337	9	128161251	128204383	-	CIZ1	protein_coding	475.199	1.57333	0.208171	7.55785	4.09792e-14	6.36913e-13
ENSG00000130349	6	107028199	107051586	+	MTRES1	protein_coding	247.097	-2.08684	0.27612	-7.55773	4.10154e-14	6.36941e-13
ENSG00000115310	2	54972187	55112621	-	RTN4	protein_coding	2976.61	1.07411	0.142178	7.55469	4.19865e-14	6.51476e-13
ENSG00000060762	6	166364919	166383013	-	MPC1	protein_coding	909.811	1.56664	0.207525	7.54919	4.37986e-14	6.79025e-13
ENSG00000034152	17	21284672	21315232	+	MAP2K3	protein_coding	471.765	2.54073	0.336723	7.54545	4.50742e-14	6.98217e-13
ENSG00000217165	6	39110321	39112952	+	ANKRD18EP	processed_pseudogene	38.3159	-4.68548	0.621027	-7.54473	4.53235e-14	7.01493e-13
ENSG00000164743	8	13566869	13568288	+	C8orf48	protein_coding	77.0169	-4.35234	0.576986	-7.54324	4.5842e-14	7.08927e-13
ENSG00000287189	6	166309572	166317470	+	AL121956.6	lncRNA	556.105	-1.7932	0.237742	-7.54265	4.60507e-14	7.1156e-13
ENSG00000132670	20	2864184	3039076	+	PTPRA	protein_coding	989.865	1.35344	0.179506	7.5398	4.70681e-14	7.26675e-13
ENSG00000174365	20	38446343	38450940	+	SNHG11	lncRNA	71.9155	-2.74049	0.363649	-7.53609	4.8428e-14	7.47048e-13
ENSG00000105388	19	41708585	41730433	+	CEACAM5	protein_coding	13023.6	2.55199	0.338655	7.53568	4.85794e-14	7.48761e-13
ENSG00000214018	X	44309314	44310476	-	RRM2P3	processed_pseudogene	33.8269	-5.00745	0.66456	-7.53499	4.88383e-14	7.52126e-13
ENSG00000130772	1	28329002	28335965	+	MED18	protein_coding	552.849	-1.80518	0.239702	-7.53095	5.03739e-14	7.75131e-13
ENSG00000078369	1	1785285	1891117	-	GNB1	protein_coding	2902.64	2.30747	0.306421	7.53039	5.05905e-14	7.77818e-13
ENSG00000276850	10	47908064	47991877	-	AC245041.2	lncRNA	363.24	-2.69752	0.358362	-7.52736	5.17773e-14	7.95406e-13
ENSG00000112079	6	36493892	36547479	-	STK38	protein_coding	2239.62	-0.873135	0.116016	-7.52602	5.23106e-14	8.02933e-13
ENSG00000248905	15	32765544	33194714	-	FMN1	protein_coding	352.197	-1.39432	0.18536	-7.52222	5.3852e-14	8.25908e-13
ENSG00000189180	10	38010650	38065088	+	ZNF33A	protein_coding	1078.37	-1.15207	0.153215	-7.51926	5.50866e-14	8.44144e-13
ENSG00000171865	2	3541430	3558333	-	RNASEH1	protein_coding	251.968	-1.55273	0.206513	-7.51879	5.52852e-14	8.46488e-13
ENSG00000088930	20	21303331	21389825	+	XRN2	protein_coding	2639.38	-1.23035	0.16365	-7.51821	5.55297e-14	8.4953e-13
ENSG00000147548	8	38269704	38382272	-	NSD3	protein_coding	1560.16	0.876627	0.116622	7.51682	5.61256e-14	8.5794e-13
ENSG00000119318	9	107283137	107332192	+	RAD23B	protein_coding	2594.67	1.55143	0.20656	7.51079	5.87711e-14	8.97638e-13
ENSG00000067064	10	1039152	1049170	-	IDI1	protein_coding	5118.38	2.33974	0.311671	7.50708	6.04596e-14	9.22668e-13
ENSG00000198911	22	41833079	41907307	+	SREBF2	protein_coding	2132.83	1.50538	0.200547	7.50635	6.08004e-14	9.27106e-13
ENSG00000164051	3	48432164	48440456	-	CCDC51	protein_coding	168.147	-1.9886	0.264939	-7.50589	6.10118e-14	9.29122e-13
ENSG00000164506	6	147204425	147390476	+	STXBP5	protein_coding	441.137	-1.5533	0.206946	-7.50585	6.10329e-14	9.29122e-13
ENSG00000118412	6	89829894	89874436	+	CASP8AP2	protein_coding	403.592	-1.66321	0.221623	-7.50468	6.15781e-14	9.36112e-13
ENSG00000197753	6	35797206	35845397	+	LHFPL5	protein_coding	83.1519	2.35407	0.313681	7.50465	6.1593e-14	9.36112e-13
ENSG00000152359	5	75674124	75717448	-	POC5	protein_coding	276.859	-2.0185	0.268985	-7.50413	6.18359e-14	9.39035e-13
ENSG00000163006	2	108786757	108885477	+	CCDC138	protein_coding	528.011	-1.8741	0.249809	-7.50215	6.2778e-14	9.52562e-13
ENSG00000259153	14	70809841	70815994	+	AC004816.1	lncRNA	254.502	2.25848	0.301101	7.50075	6.34526e-14	9.6201e-13
ENSG00000147162	X	71533104	71575892	+	OGT	protein_coding	4173.56	-1.39698	0.186352	-7.49645	6.55676e-14	9.93264e-13
ENSG00000048342	4	15469865	15601557	+	CC2D2A	protein_coding	2949.68	-1.30087	0.173618	-7.49276	6.74421e-14	1.02083e-12
ENSG00000149257	11	75562056	75572783	+	SERPINH1	protein_coding	1345.92	1.97264	0.263333	7.49104	6.83313e-14	1.03344e-12
ENSG00000143819	1	225810092	225845563	+	EPHX1	protein_coding	1564.64	1.86023	0.248401	7.48883	6.94926e-14	1.05015e-12
ENSG00000150961	4	118722823	118838683	-	SEC24D	protein_coding	1144.88	1.72228	0.229986	7.48864	6.95914e-14	1.05078e-12
ENSG00000160932	8	143017982	143023832	+	LY6E	protein_coding	5517.81	1.77467	0.237007	7.48781	7.0034e-14	1.05661e-12
ENSG00000176871	12	118032694	118062430	-	WSB2	protein_coding	1151.73	1.75232	0.234026	7.48769	7.0099e-14	1.05673e-12
ENSG00000119203	2	9423651	9473101	+	CPSF3	protein_coding	915.758	-1.69353	0.226185	-7.48735	7.02799e-14	1.05859e-12
ENSG00000188817	3	63652675	63679020	+	SNTN	protein_coding	3428.85	-1.45998	0.195019	-7.48637	7.0803e-14	1.06561e-12
ENSG00000226752	9	120824828	120854385	+	CUTALP	transcribed_unitary_pseudogene	250.975	-2.69937	0.360616	-7.48545	7.13022e-14	1.07225e-12
ENSG00000113621	5	134873803	134901525	+	TXNDC15	protein_coding	508.303	-1.41402	0.188982	-7.48233	7.3015e-14	1.09712e-12
ENSG00000133226	1	24631716	24673281	+	SRRM1	protein_coding	1573.78	1.10784	0.148107	7.48001	7.43173e-14	1.11578e-12
ENSG00000204463	6	31639028	31652705	-	BAG6	protein_coding	1464.31	2.16625	0.289626	7.47948	7.46197e-14	1.11942e-12
ENSG00000116954	1	38838198	38859772	-	RRAGC	protein_coding	181.268	1.96119	0.262215	7.4793	7.47199e-14	1.12001e-12
ENSG00000187187	19	39984134	40021038	+	ZNF546	protein_coding	99.1132	-3.23283	0.432575	-7.47345	7.81191e-14	1.17002e-12
ENSG00000087266	4	2793071	2841098	+	SH3BP2	protein_coding	1019.98	1.74193	0.233132	7.47183	7.90847e-14	1.18353e-12
ENSG00000167671	19	4444999	4457794	-	UBXN6	protein_coding	1105.81	1.55391	0.207987	7.47118	7.94819e-14	1.18851e-12
ENSG00000224810	1	182062677	182069253	-	AL355482.1	lncRNA	32.1044	-5.04862	0.675812	-7.47045	7.99216e-14	1.19412e-12
ENSG00000177640	10	118046279	118210158	+	CASC2	lncRNA	443.917	-1.76045	0.2357	-7.46903	8.07856e-14	1.20606e-12
ENSG00000175602	11	65890673	65891635	+	CCDC85B	protein_coding	151.752	2.61615	0.350279	7.46876	8.09571e-14	1.20765e-12
ENSG00000163002	2	183117513	183161680	+	NUP35	protein_coding	180.662	-2.14186	0.286825	-7.46751	8.17285e-14	1.21818e-12
ENSG00000178096	1	149887890	149900798	+	BOLA1	protein_coding	193.811	-1.95561	0.261973	-7.46492	8.33523e-14	1.24138e-12
ENSG00000079435	19	42401514	42427388	-	LIPE	protein_coding	101.712	2.23271	0.299281	7.46024	8.63681e-14	1.28526e-12
ENSG00000133657	3	194402672	194498364	-	ATP13A3	protein_coding	2691.14	0.840119	0.112619	7.45984	8.66247e-14	1.28805e-12
ENSG00000090372	19	46719511	46746994	-	STRN4	protein_coding	753.197	1.48098	0.198588	7.45755	8.81445e-14	1.3096e-12
ENSG00000261338	2	218255319	218257366	+	AC021016.2	lncRNA	59.492	-4.17352	0.559978	-7.45301	9.12348e-14	1.35442e-12
ENSG00000125772	20	5544439	5611006	-	GPCPD1	protein_coding	3727.65	1.33911	0.179718	7.45119	9.25033e-14	1.37216e-12
ENSG00000006118	11	60924463	60937159	+	TMEM132A	protein_coding	1066.55	2.49177	0.334463	7.45006	9.32989e-14	1.38285e-12
ENSG00000175305	8	94879770	94896678	-	CCNE2	protein_coding	43.4169	-5.88516	0.790056	-7.44904	9.4023e-14	1.39247e-12
ENSG00000163060	2	94871430	94876823	+	TEKT4	protein_coding	151.379	-2.34166	0.314463	-7.44654	9.5819e-14	1.41794e-12
ENSG00000286830	7	102699228	102748695	-	AC105052.5	lncRNA	281.071	-2.64405	0.355086	-7.44622	9.60504e-14	1.42023e-12
ENSG00000111615	12	75490863	75511636	-	KRR1	protein_coding	810.76	-1.6121	0.216506	-7.446	9.62125e-14	1.42149e-12
ENSG00000171621	1	9292894	9369532	+	SPSB1	protein_coding	857.072	1.48949	0.200062	7.44513	9.68501e-14	1.42977e-12
ENSG00000132780	1	45583846	45618904	+	NASP	protein_coding	1270.03	-1.36311	0.183118	-7.44388	9.77709e-14	1.44107e-12
ENSG00000141644	18	50266882	50281774	-	MBD1	protein_coding	876.634	1.20169	0.161433	7.44389	9.7761e-14	1.44107e-12
ENSG00000159069	9	136940435	136944738	-	FBXW5	protein_coding	1053.98	1.58726	0.213254	7.44304	9.83939e-14	1.44801e-12
ENSG00000197798	11	126211724	126262984	+	FAM118B	protein_coding	278.215	-1.55422	0.208816	-7.44304	9.83975e-14	1.44801e-12
ENSG00000105953	7	44606572	44709066	+	OGDH	protein_coding	817.465	2.33952	0.314333	7.44281	9.85673e-14	1.44935e-12
ENSG00000196924	X	154348524	154374638	-	FLNA	protein_coding	2903.53	2.40167	0.322692	7.4426	9.87249e-14	1.45052e-12
ENSG00000197157	7	127652194	128092609	+	SND1	protein_coding	1321.08	2.01312	0.270528	7.44146	9.95755e-14	1.46186e-12
ENSG00000049860	5	74640023	74722647	+	HEXB	protein_coding	1621.12	1.4203	0.190873	7.44104	9.98935e-14	1.46537e-12
ENSG00000068784	2	45388680	45612165	-	SRBD1	protein_coding	290.613	-1.67157	0.224726	-7.43824	1.02033e-13	1.49557e-12
ENSG00000162783	1	181088700	181092900	+	IER5	protein_coding	1694.63	2.17846	0.292884	7.43796	1.0225e-13	1.49757e-12
ENSG00000096433	6	33620365	33696574	+	ITPR3	protein_coding	1325.35	1.88636	0.25362	7.43775	1.02414e-13	1.49878e-12
ENSG00000114784	3	40309707	40312424	+	EIF1B	protein_coding	618.683	1.23301	0.165795	7.43694	1.03048e-13	1.50688e-12
ENSG00000004766	7	93232340	93361123	+	VPS50	protein_coding	854.064	-1.59103	0.213962	-7.43607	1.03728e-13	1.51563e-12
ENSG00000163694	4	40423267	40630875	-	RBM47	protein_coding	2058.9	1.29043	0.173561	7.43503	1.04547e-13	1.52638e-12
ENSG00000140365	15	75336020	75343224	+	COMMD4	protein_coding	673.43	-1.35865	0.182746	-7.43463	1.04862e-13	1.52978e-12
ENSG00000117593	1	173824653	173858808	+	DARS2	protein_coding	604.366	-1.44867	0.194878	-7.43374	1.05572e-13	1.53893e-12
ENSG00000163832	3	47495640	47513712	-	ELP6	protein_coding	278.168	-1.74573	0.234915	-7.43134	1.075e-13	1.5658e-12
ENSG00000120063	17	65009289	65056740	-	GNA13	protein_coding	1565.42	1.10721	0.149013	7.43026	1.08385e-13	1.57745e-12
ENSG00000165506	14	49625174	49635230	-	DNAAF2	protein_coding	406.237	-1.58729	0.213674	-7.42855	1.09793e-13	1.59669e-12
ENSG00000115841	2	37923187	38067142	+	RMDN2	protein_coding	136.877	-2.78042	0.374356	-7.42722	1.10904e-13	1.61159e-12
ENSG00000070061	9	108867517	108934124	-	ELP1	protein_coding	1366.43	-1.0104	0.136057	-7.42629	1.11686e-13	1.62168e-12
ENSG00000164440	6	139240061	139291998	-	TXLNB	protein_coding	248.288	-1.69538	0.228315	-7.42563	1.12243e-13	1.62849e-12
ENSG00000184949	22	38578120	38656629	-	FAM227A	protein_coding	1014.01	-1.62665	0.219107	-7.424	1.13637e-13	1.64743e-12
ENSG00000104897	19	2236824	2248655	+	SF3A2	protein_coding	193.798	2.35284	0.317026	7.42162	1.157e-13	1.67602e-12
ENSG00000111196	12	10604193	10613609	-	MAGOHB	protein_coding	157.535	-2.23495	0.301181	-7.42064	1.16558e-13	1.68713e-12
ENSG00000139289	12	76025447	76033932	-	PHLDA1	protein_coding	586.233	2.78848	0.375857	7.41899	1.18018e-13	1.70694e-12
ENSG00000104341	8	97775057	97853013	+	LAPTM4B	protein_coding	1068.18	1.51293	0.203949	7.41816	1.18755e-13	1.71626e-12
ENSG00000129071	3	129430944	129440179	-	MBD4	protein_coding	956.363	-1.29818	0.175016	-7.41753	1.19325e-13	1.72315e-12
ENSG00000100412	22	41469117	41528989	+	ACO2	protein_coding	860.87	1.76417	0.237848	7.41721	1.19614e-13	1.72464e-12
ENSG00000170379	7	143620952	143730409	+	TCAF2	protein_coding	25.4769	-7.71027	1.03951	-7.41724	1.19589e-13	1.72464e-12
ENSG00000182087	19	1009648	1021179	-	TMEM259	protein_coding	869.285	1.683	0.226929	7.41645	1.20303e-13	1.73323e-12
ENSG00000163993	4	6693878	6697170	+	S100P	protein_coding	6360.9	2.42377	0.326866	7.41518	1.21459e-13	1.74851e-12
ENSG00000187240	11	103109410	103479863	+	DYNC2H1	protein_coding	3729.7	-1.49869	0.20218	-7.41263	1.23821e-13	1.78113e-12
ENSG00000178988	4	6707701	6709865	-	MRFAP1L1	protein_coding	1764.15	-1.57793	0.213057	-7.40613	1.30037e-13	1.86911e-12
ENSG00000119537	18	63327726	63367228	-	KDSR	protein_coding	696.493	1.80133	0.243235	7.40571	1.30453e-13	1.87363e-12
ENSG00000107771	10	84328586	84518521	+	CCSER2	protein_coding	1167.16	1.18826	0.160466	7.4051	1.31049e-13	1.88074e-12
ENSG00000113194	5	176447628	176510074	+	FAF2	protein_coding	1159.36	-0.954929	0.128982	-7.40359	1.32553e-13	1.90085e-12
ENSG00000197557	2	177612999	177618742	-	TTC30A	protein_coding	775.301	-1.9993	0.270101	-7.40206	1.34088e-13	1.92137e-12
ENSG00000004975	17	7225342	7234517	-	DVL2	protein_coding	307.362	1.73031	0.233766	7.4019	1.34252e-13	1.92224e-12
ENSG00000160336	19	53445001	53458261	+	ZNF761	protein_coding	151.381	-1.67029	0.2257	-7.40049	1.35682e-13	1.94121e-12
ENSG00000060558	19	3136033	3163749	+	GNA15	protein_coding	550.405	2.21838	0.299869	7.39782	1.38441e-13	1.97916e-12
ENSG00000030110	6	33572547	33580293	-	BAK1	protein_coding	717.931	2.71062	0.366451	7.39697	1.39329e-13	1.99033e-12
ENSG00000126934	19	4090321	4124129	-	MAP2K2	protein_coding	681.921	2.03534	0.27536	7.39157	1.45106e-13	2.07125e-12
ENSG00000149292	11	113314529	113383544	+	TTC12	protein_coding	1563.96	-1.60713	0.217432	-7.39144	1.45248e-13	2.07168e-12
ENSG00000177483	2	237798389	237842808	+	RBM44	protein_coding	30.3354	4.79177	0.648314	7.39112	1.45593e-13	2.075e-12
ENSG00000141504	17	7626234	7627876	-	SAT2	protein_coding	532.542	1.43381	0.193994	7.39102	1.45706e-13	2.07503e-12
ENSG00000163251	2	207762598	207769906	-	FZD5	protein_coding	169.639	2.27409	0.307762	7.38913	1.47791e-13	2.10311e-12
ENSG00000151693	2	9206765	9405683	+	ASAP2	protein_coding	336.71	2.23411	0.302374	7.38857	1.48417e-13	2.11039e-12
ENSG00000131504	5	141515016	141619055	-	DIAPH1	protein_coding	1359.53	1.68976	0.228738	7.38733	1.49805e-13	2.12849e-12
ENSG00000116786	1	15684320	15734769	+	PLEKHM2	protein_coding	509.217	2.07219	0.280563	7.38581	1.51529e-13	2.15134e-12
ENSG00000263072	16	3100696	3143734	-	ZNF213-AS1	lncRNA	99.0371	-2.39805	0.324739	-7.38456	1.52963e-13	2.17004e-12
ENSG00000186976	22	43528744	43812337	-	EFCAB6	protein_coding	613.745	-1.23862	0.167751	-7.38365	1.54008e-13	2.1832e-12
ENSG00000166479	18	68673688	68715108	-	TMX3	protein_coding	1069.11	-1.28896	0.174585	-7.38298	1.54782e-13	2.19249e-12
ENSG00000139233	12	66116555	66130750	-	LLPH	protein_coding	164.936	-2.37102	0.321219	-7.38131	1.56735e-13	2.21846e-12
ENSG00000155189	8	6708642	6761503	+	AGPAT5	protein_coding	554.366	-1.45565	0.197242	-7.38002	1.58265e-13	2.23669e-12
ENSG00000230387	20	23179272	23190419	+	AL118508.1	lncRNA	86.3957	3.67516	0.497981	7.38011	1.58156e-13	2.23669e-12
ENSG00000172602	12	48857145	48865870	-	RND1	protein_coding	281.691	6.81654	0.924036	7.37692	1.61991e-13	2.28761e-12
ENSG00000112144	6	53001279	53061802	-	ICK	protein_coding	855.984	-1.7077	0.231497	-7.37675	1.62197e-13	2.28879e-12
ENSG00000012211	X	49174802	49186528	-	PRICKLE3	protein_coding	154.885	2.00735	0.27213	7.37642	1.62603e-13	2.29277e-12
ENSG00000225830	10	49454470	49539538	-	ERCC6	protein_coding	423.978	-1.77721	0.240945	-7.37602	1.63091e-13	2.2979e-12
ENSG00000140332	15	70047790	70098176	-	TLE3	protein_coding	414.017	1.98707	0.269558	7.37158	1.68615e-13	2.37393e-12
ENSG00000170903	11	105995623	106022403	-	MSANTD4	protein_coding	334.842	-1.79498	0.243535	-7.37052	1.69967e-13	2.39115e-12
ENSG00000204271	X	56818298	56995827	-	SPIN3	protein_coding	175.05	-2.06244	0.279935	-7.36757	1.73765e-13	2.44272e-12
ENSG00000170791	8	56211686	56218809	+	CHCHD7	protein_coding	511.291	-1.61146	0.218748	-7.36674	1.7485e-13	2.45611e-12
ENSG00000090061	14	99481169	99535044	+	CCNK	protein_coding	100.295	2.73226	0.37092	7.36616	1.75607e-13	2.46489e-12
ENSG00000160051	1	32205661	32208687	+	IQCC	protein_coding	72.746	-3.55177	0.482181	-7.36605	1.75756e-13	2.46511e-12
ENSG00000089050	20	18486540	18497225	-	RBBP9	protein_coding	830.31	-1.15026	0.156221	-7.36303	1.79779e-13	2.51963e-12
ENSG00000073792	3	185643739	185825056	-	IGF2BP2	protein_coding	1065.27	1.76485	0.23973	7.36182	1.81413e-13	2.54061e-12
ENSG00000110108	11	60914158	60923443	+	TMEM109	protein_coding	631.485	1.93195	0.262626	7.35629	1.89092e-13	2.64614e-12
ENSG00000142528	19	50025714	50053414	+	ZNF473	protein_coding	565.949	-1.46579	0.199284	-7.35525	1.90565e-13	2.66362e-12
ENSG00000188290	1	998962	1000172	-	HES4	protein_coding	799.118	2.33695	0.317727	7.35521	1.90628e-13	2.66362e-12
ENSG00000128340	22	37225270	37244448	-	RAC2	protein_coding	451.45	2.93035	0.398536	7.35278	1.94129e-13	2.7105e-12
ENSG00000047634	X	17737449	17754988	+	SCML1	protein_coding	354.964	2.03329	0.276673	7.34908	1.99572e-13	2.78439e-12
ENSG00000115306	2	54456317	54671446	+	SPTBN1	protein_coding	5579.07	1.72218	0.234374	7.34801	2.01186e-13	2.8048e-12
ENSG00000230062	6	46746917	46759506	+	ANKRD66	protein_coding	1079.4	-1.46447	0.199354	-7.34605	2.04157e-13	2.84409e-12
ENSG00000151575	15	56244009	56445997	+	TEX9	protein_coding	919.112	-1.41109	0.192211	-7.34139	2.11388e-13	2.94262e-12
ENSG00000197712	4	38867677	38945739	+	FAM114A1	protein_coding	1196.45	1.81741	0.247562	7.34124	2.11629e-13	2.94376e-12
ENSG00000197779	X	47836902	48002561	+	ZNF81	protein_coding	194.904	-1.77569	0.241971	-7.33845	2.16078e-13	3.00338e-12
ENSG00000180423	11	46602861	46617909	-	HARBI1	protein_coding	93.3069	-1.78602	0.243455	-7.33612	2.1987e-13	3.05381e-12
ENSG00000167470	19	1248553	1259140	+	MIDN	protein_coding	1261.71	2.09086	0.285027	7.33567	2.20618e-13	3.0619e-12
ENSG00000166128	15	63189560	63267776	+	RAB8B	protein_coding	724.982	1.33977	0.182671	7.33435	2.22792e-13	3.08976e-12
ENSG00000112118	6	52264014	52284881	-	MCM3	protein_coding	342.186	-2.01465	0.274725	-7.33335	2.2447e-13	3.10838e-12
ENSG00000158691	6	28378955	28399734	-	ZSCAN12	protein_coding	99.761	-2.69635	0.367683	-7.33336	2.24457e-13	3.10838e-12
ENSG00000137760	11	107502726	107565746	-	ALKBH8	protein_coding	180.349	-2.8492	0.388698	-7.33011	2.29963e-13	3.18207e-12
ENSG00000145901	5	151029945	151093577	-	TNIP1	protein_coding	920.056	2.61441	0.356805	7.32727	2.3488e-13	3.24768e-12
ENSG00000002586	X	2691187	2741309	+	CD99	protein_coding	515.543	1.83261	0.250149	7.32605	2.37038e-13	3.27508e-12
ENSG00000108551	17	17494437	17496395	-	RASD1	protein_coding	39.163	5.71735	0.780586	7.32444	2.39896e-13	3.3121e-12
ENSG00000170345	14	75278826	75282230	+	FOS	protein_coding	986.732	2.62458	0.358475	7.32152	2.45171e-13	3.38241e-12
ENSG00000111540	12	55973913	55996683	+	RAB5B	protein_coding	3482.32	1.16378	0.159016	7.31866	2.50465e-13	3.45287e-12
ENSG00000089177	20	16272104	16573434	-	KIF16B	protein_coding	492.194	1.22204	0.16707	7.31451	2.58313e-13	3.55843e-12
ENSG00000032219	14	58298504	58373887	+	ARID4A	protein_coding	434.185	-1.50686	0.20605	-7.31306	2.61124e-13	3.59448e-12
ENSG00000226608	20	4023917	4024444	+	FTLP3	processed_pseudogene	33.5543	2.62263	0.358679	7.31192	2.63357e-13	3.62253e-12
ENSG00000085117	11	44564427	44620358	+	CD82	protein_coding	810.98	2.26268	0.309469	7.31149	2.64204e-13	3.63148e-12
ENSG00000066926	18	57544389	57586702	-	FECH	protein_coding	413.078	-1.09562	0.149854	-7.31122	2.64731e-13	3.63603e-12
ENSG00000156049	9	77423079	77648322	-	GNA14	protein_coding	344.763	-1.36238	0.186381	-7.30965	2.6783e-13	3.67587e-12
ENSG00000200879	11	123058077	123058161	-	SNORD14E	snoRNA	45.2294	6.45944	0.883786	7.30882	2.6949e-13	3.69592e-12
ENSG00000148343	9	129036621	129072082	+	MIGA2	protein_coding	377.297	1.35836	0.185892	7.30728	2.72609e-13	3.73593e-12
ENSG00000149308	11	108157215	108222638	-	NPAT	protein_coding	589.317	-1.92209	0.263106	-7.30537	2.76498e-13	3.78643e-12
ENSG00000141378	17	59674636	59707626	-	PTRH2	protein_coding	318.576	-1.56116	0.213745	-7.30385	2.79655e-13	3.82684e-12
ENSG00000058668	1	203626561	203744081	+	ATP2B4	protein_coding	2684.14	1.36016	0.186271	7.30206	2.8339e-13	3.87509e-12
ENSG00000130956	9	96450169	96491336	+	HABP4	protein_coding	77.2743	2.59828	0.356037	7.29777	2.92582e-13	3.99783e-12
ENSG00000110344	11	118359585	118399211	+	UBE4A	protein_coding	1542.67	-1.48245	0.203177	-7.29632	2.95739e-13	4.03622e-12
ENSG00000197852	1	111680630	111755824	-	INKA2	protein_coding	62.8617	-2.7748	0.380303	-7.29628	2.95827e-13	4.03622e-12
ENSG00000145907	5	151771045	151812785	+	G3BP1	protein_coding	3752.26	-0.973188	0.133412	-7.29459	2.99575e-13	4.08436e-12
ENSG00000143384	1	150574551	150579738	-	MCL1	protein_coding	6127.04	1.69692	0.232661	7.29353	3.01942e-13	4.1136e-12
ENSG00000198954	10	68988721	69043544	+	KIFBP	protein_coding	554.043	-1.38276	0.189641	-7.29144	3.06666e-13	4.17489e-12
ENSG00000165997	10	18659431	18681639	+	ARL5B	protein_coding	1399.74	1.35096	0.185292	7.29097	3.07734e-13	4.18591e-12
ENSG00000196821	6	34587288	34696859	-	ILRUN	protein_coding	1474.47	1.68078	0.230531	7.29088	3.07927e-13	4.18591e-12
ENSG00000107731	10	71212570	71302864	+	UNC5B	protein_coding	591.111	2.14086	0.293775	7.28742	3.15944e-13	4.29175e-12
ENSG00000104142	15	40894450	40903975	+	VPS18	protein_coding	558.272	2.53585	0.347995	7.28703	3.1686e-13	4.30104e-12
ENSG00000116138	1	15526813	15592379	+	DNAJC16	protein_coding	616.604	-1.06992	0.14683	-7.28683	3.17334e-13	4.30432e-12
ENSG00000049883	5	72320367	72368395	+	PTCD2	protein_coding	212.448	-2.01537	0.276601	-7.28619	3.18842e-13	4.32162e-12
ENSG00000160685	1	155002630	155018522	+	ZBTB7B	protein_coding	848.982	1.40164	0.192386	7.28556	3.20341e-13	4.33876e-12
ENSG00000136854	9	127579370	127696027	+	STXBP1	protein_coding	238.978	2.17489	0.298629	7.28293	3.26643e-13	4.41813e-12
ENSG00000198369	2	65310851	65432637	-	SPRED2	protein_coding	251.275	2.49588	0.342704	7.28289	3.2675e-13	4.41813e-12
ENSG00000230359	7	129055223	129057239	+	TPI1P2	transcribed_processed_pseudogene	19.6986	-7.43126	1.02038	-7.28282	3.26916e-13	4.41813e-12
ENSG00000137393	6	18387350	18468874	+	RNF144B	protein_coding	1193.4	-1.20324	0.16523	-7.28218	3.28477e-13	4.436e-12
ENSG00000173208	12	39550033	39619803	-	ABCD2	protein_coding	69.8309	-2.78388	0.382409	-7.27984	3.34211e-13	4.51014e-12
ENSG00000156697	X	129906121	129929761	+	UTP14A	protein_coding	362.083	-1.84779	0.253963	-7.27581	3.44336e-13	4.64341e-12
ENSG00000163157	1	151169986	151176284	-	TMOD4	protein_coding	21.9315	-7.51981	1.03361	-7.27531	3.4562e-13	4.65733e-12
ENSG00000109193	4	69841212	69860145	-	SULT1E1	protein_coding	40.7641	-5.34922	0.735682	-7.27111	3.56538e-13	4.80096e-12
ENSG00000112167	6	39104063	39115186	-	SAYSD1	protein_coding	210.427	-1.52405	0.209785	-7.26482	3.73544e-13	5.02631e-12
ENSG00000150457	13	20973036	21061586	-	LATS2	protein_coding	242.192	2.30146	0.316915	7.26208	3.81174e-13	5.12526e-12
ENSG00000101439	20	23626706	23638473	-	CST3	protein_coding	4670.69	1.14038	0.157048	7.26135	3.8324e-13	5.14931e-12
ENSG00000285869	16	19334011	19337804	+	LINC02858	lncRNA	24.2367	-7.61498	1.0488	-7.26069	3.85121e-13	5.17082e-12
ENSG00000165782	14	20457719	20461612	-	PIP4P1	protein_coding	474.809	1.25385	0.172708	7.25995	3.87233e-13	5.19542e-12
ENSG00000071243	7	120950763	120977216	+	ING3	protein_coding	329.321	-1.82375	0.251276	-7.25797	3.92956e-13	5.26839e-12
ENSG00000105849	7	19695461	19709037	-	TWISTNB	protein_coding	583.812	-2.07261	0.285647	-7.25586	3.99121e-13	5.34718e-12
ENSG00000168116	6	57046532	57055239	+	KIAA1586	protein_coding	97.6828	-2.87606	0.396535	-7.25297	4.07725e-13	5.45851e-12
ENSG00000135040	9	85941146	86025462	+	NAA35	protein_coding	742.34	-0.863935	0.11912	-7.25262	4.08785e-13	5.46875e-12
ENSG00000133115	13	38965925	38990859	-	STOML3	protein_coding	1711.51	-1.82691	0.252103	-7.24669	4.27089e-13	5.70812e-12
ENSG00000185621	3	197960200	198043720	+	LMLN	protein_coding	587.64	-1.19969	0.165552	-7.24662	4.27293e-13	5.70812e-12
ENSG00000168994	6	3722614	3752026	-	PXDC1	protein_coding	267.569	2.29703	0.317004	7.24605	4.29113e-13	5.72418e-12
ENSG00000240602	3	151770428	151784894	+	AADACP1	transcribed_unprocessed_pseudogene	154.011	-2.79909	0.386289	-7.2461	4.28946e-13	5.72418e-12
ENSG00000112096	6	159669069	159745186	-	SOD2	protein_coding	1906.1	2.15233	0.29706	7.24543	4.31081e-13	5.7463e-12
ENSG00000168005	11	63813456	63827716	+	SPINDOC	protein_coding	136.121	1.83039	0.252677	7.24401	4.35624e-13	5.80269e-12
ENSG00000150773	11	112064010	112074274	-	PIH1D2	protein_coding	651.731	-1.48869	0.205515	-7.24373	4.36525e-13	5.81052e-12
ENSG00000162377	1	52684449	52698347	-	COA7	protein_coding	171.725	-2.80911	0.387818	-7.24337	4.37667e-13	5.82154e-12
ENSG00000269967	1	31851913	31921841	-	AL136115.2	lncRNA	37.8328	4.2224	0.582955	7.24309	4.3858e-13	5.8295e-12
ENSG00000152760	1	66752459	66779047	+	TCTEX1D1	protein_coding	1282.99	-1.49405	0.206338	-7.24078	4.4611e-13	5.92534e-12
ENSG00000154188	8	107249482	107498055	-	ANGPT1	protein_coding	165.714	-2.33674	0.322805	-7.23885	4.52495e-13	6.00584e-12
ENSG00000164626	6	39188971	39229475	-	KCNK5	protein_coding	171.969	2.60934	0.360554	7.23703	4.58614e-13	6.08271e-12
ENSG00000198429	19	11887782	11914329	+	ZNF69	protein_coding	60.1572	-3.25289	0.449516	-7.23644	4.6063e-13	6.10507e-12
ENSG00000159905	19	43951223	43967709	+	ZNF221	protein_coding	32.258	-4.61575	0.638113	-7.23344	4.70901e-13	6.23675e-12
ENSG00000126861	17	31272013	31297539	-	OMG	protein_coding	2704.82	-2.40732	0.332886	-7.23167	4.77085e-13	6.31414e-12
ENSG00000166206	15	26543546	26939539	-	GABRB3	protein_coding	356.054	-3.27554	0.453047	-7.23002	4.82935e-13	6.387e-12
ENSG00000076604	17	28744005	28750956	+	TRAF4	protein_coding	1823.07	1.30278	0.18032	7.22481	5.01815e-13	6.63198e-12
ENSG00000105649	19	18196784	18204042	-	RAB3A	protein_coding	43.0335	4.47701	0.619748	7.22393	5.05057e-13	6.67006e-12
ENSG00000117308	1	23795599	23800781	-	GALE	protein_coding	1114.83	1.20835	0.167291	7.22305	5.08341e-13	6.70865e-12
ENSG00000156381	14	102501767	102509799	-	ANKRD9	protein_coding	609.373	1.8849	0.261004	7.22172	5.13356e-13	6.77002e-12
ENSG00000068137	17	42667914	42676994	-	PLEKHH3	protein_coding	696.51	1.6433	0.227683	7.21748	5.29614e-13	6.97946e-12
ENSG00000171408	6	135851701	136195574	+	PDE7B	protein_coding	52.1535	-2.63579	0.365253	-7.21632	5.3413e-13	7.03398e-12
ENSG00000065978	1	42682418	42703805	+	YBX1	protein_coding	5037.44	1.76686	0.244938	7.21349	5.45364e-13	7.17682e-12
ENSG00000101745	18	9136228	9285985	+	ANKRD12	protein_coding	1064.93	-1.6127	0.223574	-7.21325	5.46316e-13	7.18425e-12
ENSG00000130175	19	11435288	11450968	+	PRKCSH	protein_coding	808.591	2.24072	0.310737	7.21099	5.55468e-13	7.29943e-12
ENSG00000116698	1	183472216	183598246	+	SMG7	protein_coding	1419.01	1.15146	0.15971	7.20971	5.60692e-13	7.36286e-12
ENSG00000197122	20	37344685	37406050	+	SRC	protein_coding	482.534	2.17774	0.302126	7.20806	5.67541e-13	7.44752e-12
ENSG00000196937	7	121348878	121396364	-	FAM3C	protein_coding	4179.86	1.59666	0.221535	7.20726	5.70876e-13	7.48599e-12
ENSG00000203879	X	154436913	154443467	+	GDI1	protein_coding	881.159	1.75871	0.244023	7.20715	5.71355e-13	7.48697e-12
ENSG00000272668	1	159854870	159867685	+	AL590560.3	lncRNA	92.5187	-3.18657	0.442367	-7.20345	5.87057e-13	7.68729e-12
ENSG00000166266	11	108008898	108107761	+	CUL5	protein_coding	795.058	-1.27948	0.177636	-7.20283	5.89761e-13	7.71725e-12
ENSG00000196653	3	44712643	44723831	+	ZNF502	protein_coding	108.752	-4.26546	0.592299	-7.20154	5.95347e-13	7.78486e-12
ENSG00000005175	12	47661249	47706030	-	RPAP3	protein_coding	787.111	-1.30228	0.180861	-7.20046	6.001e-13	7.84148e-12
ENSG00000159461	16	56361452	56425545	-	AMFR	protein_coding	924.698	1.74968	0.243009	7.20009	6.01741e-13	7.85738e-12
ENSG00000119285	1	236549005	236604516	-	HEATR1	protein_coding	1021.18	-1.51563	0.210514	-7.19967	6.03571e-13	7.87573e-12
ENSG00000196628	18	55222185	55664787	-	TCF4	protein_coding	435.308	-2.42914	0.337654	-7.19415	6.28512e-13	8.1954e-12
ENSG00000134070	3	10164919	10243745	+	IRAK2	protein_coding	178.838	2.73706	0.380608	7.19128	6.41864e-13	8.36362e-12
ENSG00000211460	2	121737103	121767853	+	TSN	protein_coding	791.42	-1.28228	0.178337	-7.19019	6.47027e-13	8.42498e-12
ENSG00000213976	19	21382865	21387177	+	AC010615.1	unprocessed_pseudogene	43.1055	-5.32877	0.741673	-7.1848	6.73063e-13	8.75785e-12
ENSG00000149930	16	29973868	29992261	+	TAOK2	protein_coding	451.768	-1.80216	0.250885	-7.18319	6.81048e-13	8.85554e-12
ENSG00000188042	2	234493041	234497081	-	ARL4C	protein_coding	483.054	2.78898	0.388322	7.18215	6.8622e-13	8.91653e-12
ENSG00000171735	1	6785454	7769706	+	CAMTA1	protein_coding	412.825	1.185	0.165001	7.18179	6.88021e-13	8.93367e-12
ENSG00000114353	3	50226292	50259362	+	GNAI2	protein_coding	1709.6	2.05579	0.286303	7.18047	6.94705e-13	9.01415e-12
ENSG00000241112	5	149545383	149545810	-	RPL29P14	processed_pseudogene	36.1701	3.01994	0.420583	7.18037	6.9523e-13	9.01466e-12
ENSG00000110075	11	68460731	68615334	+	PPP6R3	protein_coding	2151.05	-1.14673	0.159728	-7.17927	7.00847e-13	9.08114e-12
ENSG00000198113	9	137277726	137282641	+	TOR4A	protein_coding	376.424	3.05997	0.426246	7.17887	7.0288e-13	9.10111e-12
ENSG00000236859	2	121649320	121728563	+	NIFK-AS1	lncRNA	50.3798	-3.37	0.469458	-7.1785	7.04799e-13	9.11959e-12
ENSG00000136108	13	52455429	52476628	+	CKAP2	protein_coding	807.11	-2.05082	0.285713	-7.1779	7.07894e-13	9.15326e-12
ENSG00000182054	15	90083045	90102504	-	IDH2	protein_coding	2560.09	1.34517	0.187416	7.17744	7.10275e-13	9.17764e-12
ENSG00000163617	3	113964137	114056594	-	CCDC191	protein_coding	924.843	-1.39181	0.193956	-7.17589	7.18408e-13	9.27627e-12
ENSG00000037897	12	57768471	57772119	-	METTL1	protein_coding	38.3888	-3.37341	0.470505	-7.16977	7.51257e-13	9.69367e-12
ENSG00000145388	4	118685392	118715433	+	METTL14	protein_coding	677.051	-1.35815	0.189469	-7.16818	7.60031e-13	9.80007e-12
ENSG00000182504	3	101724593	101770562	+	CEP97	protein_coding	921.038	-1.32339	0.184668	-7.16634	7.70303e-13	9.92561e-12
ENSG00000178567	3	36985043	36993131	-	EPM2AIP1	protein_coding	646.769	-1.30438	0.182099	-7.16302	7.89183e-13	1.01618e-11
ENSG00000144120	2	119679167	119686507	+	TMEM177	protein_coding	106.635	-2.49153	0.347852	-7.16263	7.91412e-13	1.01835e-11
ENSG00000182973	3	32685145	32773875	+	CNOT10	protein_coding	761.089	-1.40788	0.196683	-7.15813	8.17868e-13	1.05166e-11
ENSG00000076108	12	56595596	56636816	-	BAZ2A	protein_coding	1669.68	1.67479	0.233987	7.15762	8.2089e-13	1.05481e-11
ENSG00000234284	5	179023804	179035064	+	ZNF879	protein_coding	119.414	-2.70724	0.378272	-7.15684	8.25578e-13	1.0601e-11
ENSG00000162889	1	206684944	206734283	+	MAPKAPK2	protein_coding	639.127	1.90182	0.265753	7.15635	8.28563e-13	1.0632e-11
ENSG00000218416	2	240449315	240456714	-	AC110619.1	lncRNA	136.927	-2.77055	0.387336	-7.15283	8.50091e-13	1.09007e-11
ENSG00000152767	13	98142562	98455176	+	FARP1	protein_coding	614.296	1.53386	0.214449	7.15256	8.5172e-13	1.0914e-11
ENSG00000169641	1	23084023	23177808	-	LUZP1	protein_coding	757.151	-2.18853	0.306013	-7.15176	8.56752e-13	1.09709e-11
ENSG00000270344	12	89524594	89548005	+	POC1B-AS1	lncRNA	138.064	-2.28541	0.31962	-7.15041	8.65214e-13	1.10716e-11
ENSG00000136244	7	22725884	22732002	+	IL6	protein_coding	37.5297	-8.23594	1.15188	-7.14999	8.6783e-13	1.10975e-11
ENSG00000163399	1	116372668	116410261	+	ATP1A1	protein_coding	4372.91	1.90506	0.266616	7.14533	8.97811e-13	1.14729e-11
ENSG00000162909	1	223701593	223776018	+	CAPN2	protein_coding	9579.44	1.37136	0.191941	7.1447	9.01955e-13	1.15179e-11
ENSG00000145050	3	51385291	51389397	+	MANF	protein_coding	567.982	1.53767	0.215238	7.14404	9.0625e-13	1.15569e-11
ENSG00000167792	11	67605653	67612554	+	NDUFV1	protein_coding	1323.7	1.21599	0.170209	7.14409	9.05918e-13	1.15569e-11
ENSG00000197748	10	104129888	104232364	-	CFAP43	protein_coding	3941.76	-1.39483	0.195314	-7.14149	9.23242e-13	1.17655e-11
ENSG00000175874	2	101345550	101387503	-	CREG2	protein_coding	42.0568	4.47403	0.626502	7.1413	9.24554e-13	1.17741e-11
ENSG00000178750	3	94014365	94028597	-	STX19	protein_coding	142.808	-2.98882	0.418678	-7.13869	9.4222e-13	1.19908e-11
ENSG00000102081	X	147911951	147951125	+	FMR1	protein_coding	932.795	1.16068	0.162615	7.13764	9.49487e-13	1.2075e-11
ENSG00000073921	11	85957175	86069882	-	PICALM	protein_coding	2573.1	1.12197	0.157324	7.13158	9.92223e-13	1.26099e-11
ENSG00000183018	17	4498881	4539035	+	SPNS2	protein_coding	529.446	2.66927	0.374604	7.12559	1.03633e-12	1.31615e-11
ENSG00000104356	8	98117293	98159835	+	POP1	protein_coding	204.16	-2.04844	0.287552	-7.12373	1.05044e-12	1.33314e-11
ENSG00000138678	4	83535914	83605875	+	GPAT3	protein_coding	72.9611	3.31496	0.465347	7.12362	1.05131e-12	1.33333e-11
ENSG00000110583	11	63938959	63957319	+	NAA40	protein_coding	505.196	-1.35376	0.190123	-7.12047	1.07562e-12	1.36323e-11
ENSG00000157992	2	27442366	27446481	+	KRTCAP3	protein_coding	228.09	1.23798	0.173877	7.11986	1.08036e-12	1.36831e-11
ENSG00000149050	11	6997085	7020346	-	ZNF214	protein_coding	291.714	-2.18024	0.306229	-7.11964	1.0821e-12	1.36958e-11
ENSG00000148908	10	119499817	119542719	-	RGS10	protein_coding	300.017	1.633	0.229384	7.11907	1.0866e-12	1.37433e-11
ENSG00000141642	18	50967991	50988121	+	ELAC1	protein_coding	80.7867	-2.95721	0.415473	-7.1177	1.09744e-12	1.3871e-11
ENSG00000185684	12	132084283	132131639	+	EP400P1	transcribed_unprocessed_pseudogene	179.684	-2.0862	0.293115	-7.11737	1.10008e-12	1.38949e-11
ENSG00000247950	4	109347475	109433817	-	SEC24B-AS1	lncRNA	24.6388	-7.34102	1.03163	-7.11593	1.11162e-12	1.40311e-11
ENSG00000177613	10	51695486	51699595	-	CSTF2T	protein_coding	479.232	-1.23517	0.173639	-7.11345	1.13178e-12	1.42758e-11
ENSG00000279518	8	134783694	134785879	-	AC083843.4	TEC	21.6386	-7.37466	1.03709	-7.11093	1.15262e-12	1.45289e-11
ENSG00000154743	3	12484432	12539623	+	TSEN2	protein_coding	247.051	-1.77744	0.250121	-7.10632	1.19175e-12	1.50119e-11
ENSG00000177105	11	3826978	3840959	-	RHOG	protein_coding	255.73	2.37771	0.334602	7.1061	1.19371e-12	1.50264e-11
ENSG00000177889	12	93405673	93441947	-	UBE2N	protein_coding	1908.94	-1.29983	0.182963	-7.10433	1.20909e-12	1.52096e-11
ENSG00000197170	17	67337916	67366605	-	PSMD12	protein_coding	1287.26	-1.06764	0.150307	-7.10303	1.2205e-12	1.53427e-11
ENSG00000153786	16	84974181	85011535	-	ZDHHC7	protein_coding	1214.88	1.98751	0.279824	7.10272	1.22328e-12	1.53568e-11
ENSG00000162415	1	45016399	45306209	-	ZSWIM5	protein_coding	19.9924	-7.48802	1.05424	-7.10274	1.2231e-12	1.53568e-11
ENSG00000100243	22	42617840	42649392	-	CYB5R3	protein_coding	966.23	2.10274	0.296117	7.10106	1.23805e-12	1.55317e-11
ENSG00000132591	17	28855010	28861061	+	ERAL1	protein_coding	427.055	-1.06408	0.149852	-7.10089	1.23955e-12	1.55401e-11
ENSG00000047932	6	117560269	117602542	-	GOPC	protein_coding	703.22	-1.21463	0.171117	-7.09827	1.26327e-12	1.58267e-11
ENSG00000132792	20	37693955	37872129	+	CTNNBL1	protein_coding	551.28	-1.35302	0.190673	-7.09601	1.28414e-12	1.60773e-11
ENSG00000197837	12	14767999	14771131	-	H4-16	protein_coding	77.5266	-3.78075	0.532911	-7.09453	1.29791e-12	1.62388e-11
ENSG00000124532	6	24402908	24426194	+	MRS2	protein_coding	678.692	-1.65435	0.233238	-7.09293	1.31299e-12	1.64163e-11
ENSG00000243943	2	27582969	27623217	+	ZNF512	protein_coding	306.221	-1.82694	0.25759	-7.09245	1.31763e-12	1.64632e-11
ENSG00000151093	3	25782917	25794534	+	OXSM	protein_coding	258.918	-1.74745	0.246405	-7.09177	1.32408e-12	1.65217e-11
ENSG00000167987	11	61130257	61161615	-	VPS37C	protein_coding	301.809	1.64722	0.232272	7.09177	1.32409e-12	1.65217e-11
ENSG00000147224	X	107628424	107651026	+	PRPS1	protein_coding	755.917	-1.38443	0.195266	-7.08997	1.34137e-12	1.6726e-11
ENSG00000006453	7	98291650	98401090	-	BAIAP2L1	protein_coding	1018.93	1.56911	0.221344	7.08903	1.35059e-12	1.68193e-11
ENSG00000175164	9	133250401	133276024	-	ABO	protein_coding	509.678	-1.98361	0.279815	-7.08902	1.35066e-12	1.68193e-11
ENSG00000067182	12	6328757	6342114	-	TNFRSF1A	protein_coding	1362.46	2.12238	0.299418	7.08836	1.35709e-12	1.6888e-11
ENSG00000183808	8	93729356	93741017	-	RBM12B	protein_coding	258.962	-1.68624	0.237913	-7.08764	1.36414e-12	1.69643e-11
ENSG00000146830	7	100679507	100694037	-	GIGYF1	protein_coding	537.881	-1.59491	0.225036	-7.08733	1.3672e-12	1.6991e-11
ENSG00000204947	7	149102784	149126324	-	ZNF425	protein_coding	53.9364	-4.67864	0.660186	-7.08685	1.37197e-12	1.70389e-11
ENSG00000099290	10	50067888	50133509	+	WASHC2A	protein_coding	1211.22	-0.77361	0.109239	-7.08183	1.42263e-12	1.7648e-11
ENSG00000168386	3	99830141	100114513	-	FILIP1L	protein_coding	35.2838	-7.33586	1.03587	-7.0818	1.42292e-12	1.7648e-11
ENSG00000182359	11	106051098	106077459	-	KBTBD3	protein_coding	171.855	-1.83305	0.258911	-7.07987	1.44295e-12	1.78844e-11
ENSG00000111875	6	118894152	118909171	+	ASF1A	protein_coding	417.047	-1.73205	0.244817	-7.07489	1.49563e-12	1.8525e-11
ENSG00000071127	4	10074339	10116949	-	WDR1	protein_coding	2551.86	1.85855	0.262864	7.07039	1.54501e-12	1.91178e-11
ENSG00000240849	20	50118254	50153734	-	TMEM189	protein_coding	564.176	1.73637	0.245585	7.07034	1.54555e-12	1.91178e-11
ENSG00000197879	17	1464186	1492686	-	MYO1C	protein_coding	1032.32	2.29396	0.324458	7.07015	1.5477e-12	1.91316e-11
ENSG00000120471	11	128934731	128943399	-	TP53AIP1	protein_coding	193.551	-3.07069	0.434339	-7.0698	1.55159e-12	1.9167e-11
ENSG00000010017	6	13621498	13711835	-	RANBP9	protein_coding	627.353	1.42634	0.20176	7.06951	1.55479e-12	1.91937e-11
ENSG00000108175	10	79068966	79316528	+	ZMIZ1	protein_coding	644.056	1.83931	0.260243	7.06767	1.57558e-12	1.94374e-11
ENSG00000151923	10	119571802	119597029	-	TIAL1	protein_coding	1298.65	0.933077	0.132052	7.06597	1.59499e-12	1.96638e-11
ENSG00000251615	4	8355090	8358338	-	AC104825.1	lncRNA	118.8	-2.82069	0.399227	-7.06538	1.60176e-12	1.97341e-11
ENSG00000198513	14	50532509	50633068	+	ATL1	protein_coding	192.799	-1.79899	0.254655	-7.06443	1.6128e-12	1.98569e-11
ENSG00000078808	1	1216908	1232067	-	SDF4	protein_coding	923.852	2.05	0.290248	7.0629	1.6306e-12	2.00628e-11
ENSG00000164930	8	103298433	103332866	+	FZD6	protein_coding	4858	-1.53076	0.216737	-7.06274	1.63251e-12	2.0073e-11
ENSG00000130479	19	17719242	17734513	+	MAP1S	protein_coding	160.015	2.69885	0.382236	7.06069	1.65674e-12	2.03574e-11
ENSG00000204256	6	32968594	32981505	+	BRD2	protein_coding	1866.52	1.07017	0.151594	7.05943	1.67187e-12	2.05296e-11
ENSG00000164211	5	111496033	111512590	-	STARD4	protein_coding	1202.29	1.83772	0.260361	7.05836	1.68476e-12	2.06743e-11
ENSG00000099804	19	531760	542092	+	CDC34	protein_coding	356.926	2.00431	0.283976	7.05802	1.68891e-12	2.07115e-11
ENSG00000075292	2	71276561	71435069	+	ZNF638	protein_coding	3557.27	-1.17486	0.166478	-7.05715	1.69955e-12	2.08168e-11
ENSG00000169926	15	31326835	31435665	+	KLF13	protein_coding	648.575	2.06629	0.292794	7.05713	1.69975e-12	2.08168e-11
ENSG00000248008	12	120488079	120495946	-	NRAV	lncRNA	1376.48	-1.17388	0.166378	-7.05549	1.71998e-12	2.10508e-11
ENSG00000124596	6	41033627	41097787	-	OARD1	protein_coding	498.906	-1.42793	0.202425	-7.05412	1.73703e-12	2.12453e-11
ENSG00000179912	12	57253762	57431005	-	R3HDM2	protein_coding	304.672	1.66901	0.236677	7.05185	1.7655e-12	2.15793e-11
ENSG00000152193	13	78614289	78659155	-	OBI1	protein_coding	198.195	-1.85989	0.263763	-7.05138	1.77148e-12	2.16382e-11
ENSG00000139044	12	459939	563509	+	B4GALNT3	protein_coding	290.308	2.18571	0.310089	7.04866	1.80655e-12	2.20421e-11
ENSG00000163602	3	72371825	72446621	-	RYBP	protein_coding	628.912	1.36099	0.193085	7.04863	1.80693e-12	2.20421e-11
ENSG00000163121	2	96497646	96508109	-	NEURL3	protein_coding	167.815	3.34831	0.475124	7.04722	1.82525e-12	2.2251e-11
ENSG00000167302	17	81228277	81239091	-	TEPSIN	protein_coding	60.0401	-3.18338	0.451788	-7.04617	1.83904e-12	2.24043e-11
ENSG00000182796	12	55829608	55836246	+	TMEM198B	transcribed_unitary_pseudogene	187.374	-1.94542	0.276111	-7.04577	1.84434e-12	2.24542e-11
ENSG00000205189	8	80485619	80526265	+	ZBTB10	protein_coding	463.486	1.5786	0.22406	7.04545	1.84863e-12	2.24916e-11
ENSG00000177337	18	3593732	3598363	+	DLGAP1-AS1	lncRNA	144.466	-1.64839	0.234009	-7.04414	1.86607e-12	2.26889e-11
ENSG00000176624	18	51174550	51218304	-	MEX3C	protein_coding	634.575	1.38641	0.196861	7.04258	1.88713e-12	2.29299e-11
ENSG00000164054	3	48467798	48504826	-	SHISA5	protein_coding	799.598	2.36212	0.335424	7.04219	1.89237e-12	2.29786e-11
ENSG00000259925	16	19343647	19401693	-	AC130456.2	lncRNA	123.97	-2.04307	0.290179	-7.0407	1.91273e-12	2.32107e-11
ENSG00000198286	7	2906141	3043945	-	CARD11	protein_coding	222.038	2.64516	0.375826	7.03826	1.94653e-12	2.36053e-11
ENSG00000115808	2	36837698	36966536	-	STRN	protein_coding	1532.06	1.01645	0.144421	7.03812	1.94857e-12	2.36147e-11
ENSG00000139826	13	108218392	108234243	+	ABHD13	protein_coding	717.705	-1.26667	0.179987	-7.03756	1.95638e-12	2.36938e-11
ENSG00000102172	X	21940709	21994837	+	SMS	protein_coding	1335.41	1.04171	0.148041	7.03663	1.96945e-12	2.38365e-11
ENSG00000100997	20	25294742	25390835	-	ABHD12	protein_coding	445.89	1.85822	0.264098	7.0361	1.97698e-12	2.39121e-11
ENSG00000115459	2	85354394	85391752	+	ELMOD3	protein_coding	412.505	-1.15361	0.163962	-7.0358	1.98116e-12	2.3947e-11
ENSG00000160888	19	13150411	13154911	+	IER2	protein_coding	170.032	2.66921	0.379405	7.03525	1.98899e-12	2.4026e-11
ENSG00000115392	2	58159243	58241372	-	FANCL	protein_coding	361.272	-1.97293	0.280577	-7.03171	2.04017e-12	2.46282e-11
ENSG00000112029	6	152970519	152983579	-	FBXO5	protein_coding	62.4264	-4.7462	0.675005	-7.03135	2.04538e-12	2.46749e-11
ENSG00000111348	12	14942031	14961728	-	ARHGDIB	protein_coding	1987.83	-1.8653	0.265315	-7.03052	2.05762e-12	2.48065e-11
ENSG00000153822	17	70053429	70135608	+	KCNJ16	protein_coding	152.861	-4.11409	0.585216	-7.03004	2.06473e-12	2.4876e-11
ENSG00000171885	18	26852043	26865771	-	AQP4	polymorphic_pseudogene	203.41	1.76383	0.250994	7.02738	2.10449e-12	2.53386e-11
ENSG00000157600	X	110002631	110182734	+	TMEM164	protein_coding	366.185	2.08571	0.296811	7.02705	2.10945e-12	2.53819e-11
ENSG00000156804	8	123497889	123541206	-	FBXO32	protein_coding	950.35	1.65966	0.236211	7.02618	2.12261e-12	2.55236e-11
ENSG00000107738	10	71747556	71773520	-	VSIR	protein_coding	822.804	1.53214	0.218142	7.02361	2.16212e-12	2.59819e-11
ENSG00000247708	4	4542131	4787359	+	STX18-AS1	lncRNA	54.2508	-2.72822	0.388454	-7.02326	2.16744e-12	2.60164e-11
ENSG00000253223	8	66984135	66986187	-	AC110998.1	processed_pseudogene	52.1587	-4.59606	0.654407	-7.02324	2.1678e-12	2.60164e-11
ENSG00000272316	6	57908560	57913911	-	AL021368.2	lncRNA	63.8327	-3.1249	0.444956	-7.02293	2.17264e-12	2.60577e-11
ENSG00000151461	10	11920022	12043170	-	UPF2	protein_coding	1232.58	-1.18906	0.169351	-7.02129	2.19834e-12	2.63488e-11
ENSG00000130385	X	50910735	50916641	+	BMP15	protein_coding	18.9449	-7.47858	1.06519	-7.02086	2.20513e-12	2.64132e-11
ENSG00000169241	1	155135344	155138857	+	SLC50A1	protein_coding	728.005	1.45011	0.206606	7.0187	2.23946e-12	2.6807e-11
ENSG00000144645	3	31657890	32077580	-	OSBPL10	protein_coding	311.687	1.36171	0.194021	7.01837	2.24474e-12	2.68529e-11
ENSG00000138798	4	109912883	110013766	+	EGF	protein_coding	426.706	1.78834	0.255003	7.013	2.33261e-12	2.7886e-11
ENSG00000141252	17	508668	721717	-	VPS53	protein_coding	549.604	1.50797	0.215062	7.01179	2.35295e-12	2.81111e-11
ENSG00000122435	1	100133150	100150498	+	TRMT13	protein_coding	329.315	-1.74964	0.249565	-7.01076	2.37034e-12	2.83006e-11
ENSG00000160211	X	154531391	154547572	-	G6PD	protein_coding	541.937	2.60553	0.371761	7.0086	2.4071e-12	2.8721e-11
ENSG00000120008	10	120851305	120909524	+	WDR11	protein_coding	1769.95	-1.11321	0.158949	-7.00355	2.49549e-12	2.97566e-11
ENSG00000100982	20	45934683	45948023	+	PCIF1	protein_coding	211.237	2.03818	0.291168	7.00003	2.55916e-12	3.04961e-11
ENSG00000117676	1	26529761	26575030	+	RPS6KA1	protein_coding	627.587	1.68403	0.240639	6.99814	2.59379e-12	3.0889e-11
ENSG00000197953	3	151733916	151761339	+	AADACL2	protein_coding	41.26	-6.15825	0.88013	-6.99698	2.61539e-12	3.11262e-11
ENSG00000166704	19	57977053	58003349	-	ZNF606	protein_coding	291.884	-1.57481	0.225156	-6.99431	2.6657e-12	3.17005e-11
ENSG00000180346	4	89111500	89114899	+	TIGD2	protein_coding	188.355	-1.82652	0.261146	-6.99424	2.66706e-12	3.17005e-11
ENSG00000172339	1	94974405	95072951	-	ALG14	protein_coding	136.936	-2.08728	0.29846	-6.99349	2.68122e-12	3.18483e-11
ENSG00000130402	19	38647649	38731589	+	ACTN4	protein_coding	5622.09	2.04178	0.29199	6.99262	2.69793e-12	3.20262e-11
ENSG00000185909	3	49171598	49176486	+	KLHDC8B	protein_coding	307.999	1.3492	0.192986	6.99121	2.72517e-12	3.23289e-11
ENSG00000161960	17	7572706	7579006	+	EIF4A1	protein_coding	124.602	2.14378	0.306647	6.99103	2.72874e-12	3.23299e-11
ENSG00000185055	7	105565120	105600875	-	EFCAB10	protein_coding	371.31	-1.17496	0.168067	-6.99103	2.72873e-12	3.23299e-11
ENSG00000204520	6	31399784	31415315	+	MICA	protein_coding	467.227	1.94163	0.277803	6.98924	2.76372e-12	3.27235e-11
ENSG00000127914	7	91940867	92110673	+	AKAP9	protein_coding	5533.9	-1.27301	0.182186	-6.98743	2.79963e-12	3.31275e-11
ENSG00000034713	16	75566375	75577881	+	GABARAPL2	protein_coding	1438.24	1.15705	0.165593	6.98729	2.80247e-12	3.31399e-11
ENSG00000113649	5	146447311	146511961	+	TCERG1	protein_coding	1442.46	1.08748	0.155668	6.98588	2.83078e-12	3.34534e-11
ENSG00000105698	19	35268962	35279821	+	USF2	protein_coding	691.458	1.61712	0.231719	6.97879	2.97735e-12	3.51631e-11
ENSG00000024422	19	47713422	47743134	+	EHD2	protein_coding	371.502	2.62146	0.375696	6.9776	3.00258e-12	3.54385e-11
ENSG00000058804	1	53765478	53838463	-	NDC1	protein_coding	764.901	-1.49809	0.214709	-6.9773	3.00906e-12	3.54924e-11
ENSG00000143842	1	204073115	204127743	+	SOX13	protein_coding	414.627	1.68264	0.241212	6.97578	3.0417e-12	3.58545e-11
ENSG00000013275	19	39971165	39981764	+	PSMC4	protein_coding	1701.31	-1.21033	0.173515	-6.97536	3.05096e-12	3.59408e-11
ENSG00000113593	5	65563236	65587549	+	PPWD1	protein_coding	697.887	-1.46884	0.21058	-6.97518	3.05472e-12	3.59623e-11
ENSG00000006695	17	14069490	14231736	+	COX10	protein_coding	168.375	1.57952	0.226496	6.97369	3.08731e-12	3.63229e-11
ENSG00000146233	6	46549580	46652830	-	CYP39A1	protein_coding	219.112	-1.77972	0.25522	-6.97327	3.09657e-12	3.64088e-11
ENSG00000115875	2	38743599	38751494	-	SRSF7	protein_coding	2201.3	-1.67609	0.240397	-6.97217	3.12099e-12	3.66726e-11
ENSG00000005238	9	35104112	35116341	-	FAM214B	protein_coding	520.4	2.26414	0.324878	6.96921	3.18727e-12	3.74278e-11
ENSG00000118007	3	136336236	136752403	-	STAG1	protein_coding	513.202	-1.55591	0.223271	-6.96868	3.19918e-12	3.75438e-11
ENSG00000151131	12	104986316	105074197	+	C12orf45	protein_coding	155.143	-1.68631	0.241992	-6.96847	3.20398e-12	3.75763e-11
ENSG00000215386	21	15928296	16645467	+	MIR99AHG	lncRNA	204.637	-2.64568	0.379803	-6.96592	3.26272e-12	3.8241e-11
ENSG00000034239	8	48710789	48735311	-	EFCAB1	protein_coding	4015.16	-1.51131	0.216972	-6.96545	3.27353e-12	3.83435e-11
ENSG00000285210	1	86288704	86320711	-	LINC02795	lncRNA	166.48	-2.24213	0.322013	-6.96286	3.33428e-12	3.90305e-11
ENSG00000264522	1	149937812	150010726	-	OTUD7B	protein_coding	490.624	1.07647	0.154641	6.96111	3.37604e-12	3.94943e-11
ENSG00000163162	2	101271219	101308701	-	RNF149	protein_coding	1049.72	1.37519	0.197601	6.95944	3.4164e-12	3.99413e-11
ENSG00000087365	11	66050729	66069308	+	SF3B2	protein_coding	1572.1	1.78406	0.256416	6.9577	3.45869e-12	4.04102e-11
ENSG00000110047	11	64851642	64888296	-	EHD1	protein_coding	538.741	2.90787	0.418022	6.95626	3.49427e-12	4.08002e-11
ENSG00000131018	6	152121684	152637801	-	SYNE1	protein_coding	2189.87	-1.43259	0.205965	-6.9555	3.51312e-12	4.09945e-11
ENSG00000005302	X	11758159	11775772	+	MSL3	protein_coding	821.249	-1.33766	0.192335	-6.95485	3.52939e-12	4.11585e-11
ENSG00000156299	21	31118416	31559977	-	TIAM1	protein_coding	361.792	1.99805	0.287612	6.94703	3.73069e-12	4.34786e-11
ENSG00000124459	19	43912624	43935282	-	ZNF45	protein_coding	226.033	-1.80017	0.25918	-6.94565	3.76729e-12	4.385e-11
ENSG00000133812	11	9778667	10294207	-	SBF2	protein_coding	1207.94	1.19294	0.171751	6.94573	3.76499e-12	4.385e-11
ENSG00000145908	5	150894392	150904983	-	ZNF300	protein_coding	334.672	-2.59768	0.37403	-6.94512	3.78131e-12	4.39856e-11
ENSG00000182580	3	184561785	184582408	+	EPHB3	protein_coding	205.998	2.47992	0.357457	6.93767	3.98628e-12	4.63408e-11
ENSG00000162814	1	217631324	217871696	+	SPATA17	protein_coding	1012.58	-1.2633	0.18214	-6.93589	4.03662e-12	4.68967e-11
ENSG00000183087	13	113820549	113864076	-	GAS6	protein_coding	268.247	1.90813	0.275275	6.93175	4.15672e-12	4.82616e-11
ENSG00000121390	13	19674752	19783019	-	PSPC1	protein_coding	681.301	-1.36319	0.19674	-6.92889	4.2416e-12	4.92163e-11
ENSG00000136045	12	107685799	107713162	+	PWP1	protein_coding	920.788	-1.37914	0.199078	-6.92764	4.27928e-12	4.96226e-11
ENSG00000168447	16	23278231	23381294	+	SCNN1B	protein_coding	171.965	2.39259	0.345509	6.92484	4.36454e-12	5.05796e-11
ENSG00000128422	17	41619442	41624842	-	KRT17	protein_coding	14525.2	3.35092	0.483966	6.92387	4.39464e-12	5.08648e-11
ENSG00000159720	16	67438014	67481181	-	ATP6V0D1	protein_coding	823.635	1.78317	0.257539	6.92388	4.39423e-12	5.08648e-11
ENSG00000066923	7	100177563	100221488	+	STAG3	protein_coding	188.2	-2.16997	0.313608	-6.91938	4.5363e-12	5.24717e-11
ENSG00000124151	20	47501887	47656877	+	NCOA3	protein_coding	1512.12	0.796509	0.115117	6.91915	4.54373e-12	5.24921e-11
ENSG00000149485	11	61799627	61829318	-	FADS1	protein_coding	201.125	2.29359	0.331481	6.91923	4.54106e-12	5.24921e-11
ENSG00000101343	20	20034368	20056046	-	CRNKL1	protein_coding	882.262	-1.52423	0.22033	-6.91796	4.58189e-12	5.2867e-11
ENSG00000163545	1	205302063	205321760	-	NUAK2	protein_coding	290.376	2.26259	0.32706	6.91796	4.58184e-12	5.2867e-11
ENSG00000125845	20	6767686	6780246	+	BMP2	protein_coding	83.718	2.69883	0.390131	6.91775	4.5886e-12	5.29116e-11
ENSG00000171159	9	128160265	128163924	+	C9orf16	protein_coding	663.747	2.02276	0.292494	6.91558	4.65968e-12	5.36978e-11
ENSG00000279339	17	78897264	78900152	+	AC100788.2	TEC	32.7369	4.64753	0.672115	6.91478	4.68577e-12	5.39649e-11
ENSG00000124762	6	36676460	36687339	+	CDKN1A	protein_coding	9805.67	2.08249	0.301233	6.9132	4.73837e-12	5.45368e-11
ENSG00000146842	7	130164713	130207770	-	TMEM209	protein_coding	222.792	-1.28097	0.185302	-6.91289	4.74868e-12	5.46216e-11
ENSG00000198920	17	6578147	6640711	-	KIAA0753	protein_coding	948.467	-1.32287	0.191373	-6.91253	4.76077e-12	5.47268e-11
ENSG00000162924	2	60881521	60931610	+	REL	protein_coding	795.884	1.22354	0.177052	6.91063	4.82508e-12	5.54316e-11
ENSG00000128563	7	102363872	102426676	+	PRKRIP1	protein_coding	173.297	-1.23614	0.178968	-6.90704	4.94865e-12	5.6816e-11
ENSG00000166225	12	69470349	69579789	+	FRS2	protein_coding	918.614	-1.47638	0.21382	-6.90478	5.02804e-12	5.76918e-11
ENSG00000124920	11	61752642	61788518	+	MYRF	protein_coding	346.952	2.62448	0.380115	6.90442	5.04078e-12	5.78022e-11
ENSG00000231389	6	33064569	33080775	-	HLA-DPA1	protein_coding	933.557	-0.926217	0.134184	-6.90258	5.10668e-12	5.85217e-11
ENSG00000172725	11	67435510	67443821	-	CORO1B	protein_coding	1194.39	1.62969	0.236106	6.90236	5.11441e-12	5.8574e-11
ENSG00000164715	7	98106862	98209638	+	LMTK2	protein_coding	645.454	2.09213	0.303254	6.89895	5.23878e-12	5.99614e-11
ENSG00000169016	2	11444375	11466177	-	E2F6	protein_coding	133.95	-1.51553	0.219693	-6.8984	5.25929e-12	6.0159e-11
ENSG00000107829	10	101610664	101695295	-	FBXW4	protein_coding	168.745	2.22341	0.322396	6.89651	5.32968e-12	6.09265e-11
ENSG00000221909	7	99546300	99558536	-	FAM200A	protein_coding	143.678	-2.74935	0.398689	-6.89596	5.35016e-12	6.1123e-11
ENSG00000218739	2	37196488	37216193	+	CEBPZOS	protein_coding	619.168	-0.986737	0.143098	-6.89552	5.36688e-12	6.12763e-11
ENSG00000162396	1	54756898	54764523	-	PARS2	protein_coding	44.0922	-3.78691	0.549367	-6.89323	5.45398e-12	6.22324e-11
ENSG00000175203	12	57530102	57547331	-	DCTN2	protein_coding	1254.36	1.07173	0.155484	6.89289	5.46689e-12	6.23413e-11
ENSG00000286042	6	79307669	79313384	-	LCAL1	lncRNA	28.3461	-7.12773	1.03411	-6.89263	5.47699e-12	6.24182e-11
ENSG00000163110	4	94451857	94668227	+	PDLIM5	protein_coding	3871.58	1.01492	0.147261	6.89198	5.50212e-12	6.26661e-11
ENSG00000196781	9	81583683	81689547	-	TLE1	protein_coding	378.868	1.44243	0.209299	6.89172	5.51232e-12	6.27437e-11
ENSG00000143578	1	153967534	153974361	+	CREB3L4	protein_coding	223.139	-1.83348	0.266055	-6.89134	5.5271e-12	6.28733e-11
ENSG00000162729	1	160091340	160098943	-	IGSF8	protein_coding	332.274	2.01726	0.292777	6.89009	5.57583e-12	6.33887e-11
ENSG00000112146	6	53051991	53100873	+	FBXO9	protein_coding	719.065	-1.28908	0.187133	-6.88854	5.63681e-12	6.40428e-11
ENSG00000103855	15	73683966	73714514	+	CD276	protein_coding	519.097	2.64796	0.384484	6.88706	5.6959e-12	6.46744e-11
ENSG00000124209	20	58309715	58367507	+	RAB22A	protein_coding	748.873	1.54022	0.223684	6.88569	5.75063e-12	6.52559e-11
ENSG00000086544	19	40717112	40740860	+	ITPKC	protein_coding	762.133	1.8678	0.271413	6.88177	5.91133e-12	6.70385e-11
ENSG00000009724	1	11026523	11047239	-	MASP2	protein_coding	37.5159	-5.93806	0.863274	-6.87853	6.04744e-12	6.85335e-11
ENSG00000169919	7	65960684	65982215	-	GUSB	protein_coding	339.839	1.97631	0.287318	6.87845	6.05055e-12	6.85335e-11
ENSG00000145723	5	103086000	103120138	-	GIN1	protein_coding	168.822	-1.58513	0.230581	-6.87451	6.22024e-12	7.04125e-11
ENSG00000101213	20	63528001	63537376	-	PTK6	protein_coding	456.605	1.57316	0.228849	6.87424	6.23202e-12	7.05028e-11
ENSG00000080845	20	36306336	36528637	+	DLGAP4	protein_coding	416.194	1.63231	0.237462	6.87396	6.24423e-12	7.05978e-11
ENSG00000111319	12	6346843	6377730	-	SCNN1A	protein_coding	4556.78	1.69726	0.246939	6.8732	6.27782e-12	7.09344e-11
ENSG00000256043	4	155924118	155953866	-	CTSO	protein_coding	883.819	-1.06698	0.15526	-6.87221	6.3215e-12	7.13844e-11
ENSG00000118690	6	108848416	108974476	+	ARMC2	protein_coding	750.698	-1.48296	0.21587	-6.86967	6.43488e-12	7.26205e-11
ENSG00000116017	19	925781	975939	+	ARID3A	protein_coding	68.0575	2.40417	0.350028	6.8685	6.48823e-12	7.31781e-11
ENSG00000196396	20	50510321	50585241	+	PTPN1	protein_coding	700.708	1.54931	0.225583	6.86801	6.51022e-12	7.33815e-11
ENSG00000156711	6	36127809	36144524	+	MAPK13	protein_coding	863.304	1.6571	0.241286	6.86781	6.51953e-12	7.34418e-11
ENSG00000108846	17	50634777	50692253	+	ABCC3	protein_coding	475.487	2.23992	0.326182	6.86709	6.55237e-12	7.37665e-11
ENSG00000141858	19	14087851	14091036	-	SAMD1	protein_coding	150.37	1.7318	0.252191	6.86701	6.55631e-12	7.37665e-11
ENSG00000079215	5	36606355	36688334	+	SLC1A3	protein_coding	305.647	-3.22587	0.469822	-6.86615	6.5956e-12	7.41185e-11
ENSG00000207607	1	1167863	1167952	+	MIR200A	miRNA	16.4948	-7.42995	1.08211	-6.86617	6.59485e-12	7.41185e-11
ENSG00000125122	16	67207139	67227048	-	LRRC29	protein_coding	28.0908	-4.42057	0.643903	-6.86527	6.63645e-12	7.45324e-11
ENSG00000124171	20	50731580	50756795	+	PARD6B	protein_coding	265.086	1.6345	0.238118	6.86422	6.68546e-12	7.50374e-11
ENSG00000204052	6	43506969	43510686	-	LRRC73	protein_coding	82.0326	2.73842	0.398957	6.86394	6.69845e-12	7.51377e-11
ENSG00000171206	10	102642310	102660680	+	TRIM8	protein_coding	956.587	1.91021	0.278308	6.86366	6.71197e-12	7.52439e-11
ENSG00000231721	7	130938963	131110176	-	LINC-PINT	lncRNA	117.481	2.21528	0.32282	6.86228	6.77688e-12	7.59257e-11
ENSG00000105568	19	52190048	52229518	+	PPP2R1A	protein_coding	2358.68	1.30546	0.190298	6.86007	6.88255e-12	7.70629e-11
ENSG00000181904	5	134845680	134859735	+	C5orf24	protein_coding	680.802	-1.31886	0.192304	-6.85816	6.97513e-12	7.80524e-11
ENSG00000166164	16	50313487	50368934	-	BRD7	protein_coding	1157.8	0.805392	0.117474	6.85591	7.08601e-12	7.92453e-11
ENSG00000115539	2	100562993	100576739	+	PDCL3	protein_coding	313.619	-1.46082	0.213136	-6.85395	7.18366e-12	8.02889e-11
ENSG00000100811	14	100238298	100282788	+	YY1	protein_coding	889.837	1.6575	0.241839	6.85375	7.19374e-12	8.03532e-11
ENSG00000116991	1	232397965	232561558	-	SIPA1L2	protein_coding	524.315	1.45075	0.211679	6.85353	7.20477e-12	8.0428e-11
ENSG00000196535	17	29071124	29180412	-	MYO18A	protein_coding	971.04	1.70513	0.24886	6.85174	7.29586e-12	8.13958e-11
ENSG00000229598	22	38722743	38723505	-	PRDX3P1	processed_pseudogene	32.499	3.44027	0.502219	6.85014	7.37754e-12	8.22576e-11
ENSG00000174028	X	23075758	23076767	+	FAM3C2	processed_pseudogene	188.591	2.09628	0.306112	6.84808	7.48468e-12	8.3402e-11
ENSG00000021776	15	34851782	34969742	-	AQR	protein_coding	1840.25	-1.4623	0.213549	-6.84763	7.5085e-12	8.36012e-11
ENSG00000267710	19	56272748	56310454	+	EDDM13	protein_coding	51.4236	-4.13506	0.603873	-6.84757	7.51157e-12	8.36012e-11
ENSG00000126088	1	45010950	45015575	+	UROD	protein_coding	752.88	-1.20284	0.17572	-6.84524	7.63484e-12	8.49222e-11
ENSG00000167110	9	128255829	128275995	-	GOLGA2	protein_coding	1386.73	1.59101	0.232483	6.84354	7.72593e-12	8.58838e-11
ENSG00000137168	6	36854827	36874803	-	PPIL1	protein_coding	622.565	-1.51137	0.220861	-6.84306	7.75186e-12	8.61204e-11
ENSG00000105289	19	3708362	3750813	+	TJP3	protein_coding	1366.21	1.92733	0.281671	6.84249	7.78278e-12	8.64122e-11
ENSG00000132196	1	162790702	162812817	+	HSD17B7	protein_coding	385.156	1.79957	0.263026	6.84177	7.82208e-12	8.67965e-11
ENSG00000177946	16	89969773	89972832	-	CENPBD1	protein_coding	49.6545	-4.70842	0.689027	-6.83343	8.29076e-12	9.19421e-11
ENSG00000127081	9	92844182	92878038	-	ZNF484	protein_coding	164.075	-2.27977	0.333657	-6.83268	8.33418e-12	9.23685e-11
ENSG00000124749	6	56056590	56394094	-	COL21A1	protein_coding	1169.33	-1.70263	0.249247	-6.83112	8.42567e-12	9.32594e-11
ENSG00000167323	11	3854527	4093210	+	STIM1	protein_coding	636.95	1.98493	0.290569	6.8312	8.42057e-12	9.32594e-11
ENSG00000184012	21	41464305	41531116	-	TMPRSS2	protein_coding	1691.04	2.02285	0.296126	6.83105	8.42966e-12	9.32594e-11
ENSG00000069956	15	51952106	52067375	+	MAPK6	protein_coding	6695.69	1.11742	0.163605	6.82998	8.49276e-12	9.39014e-11
ENSG00000101084	20	36605779	36612557	+	RAB5IF	protein_coding	240.429	1.50903	0.220959	6.82946	8.52374e-12	9.41879e-11
ENSG00000086475	10	13317428	13348298	-	SEPHS1	protein_coding	708.739	-0.921815	0.135062	-6.82513	8.7843e-12	9.6952e-11
ENSG00000261505	16	1317891	1322845	-	AL031714.1	lncRNA	101.997	2.76205	0.404687	6.82513	8.78435e-12	9.6952e-11
ENSG00000182247	3	23203020	23591794	+	UBE2E2	protein_coding	251.39	1.79778	0.263498	6.82273	8.93292e-12	9.85332e-11
ENSG00000204519	19	57681969	57717301	+	ZNF551	protein_coding	121.682	-2.97213	0.435664	-6.82207	8.97369e-12	9.8924e-11
ENSG00000140379	15	79960892	79971196	-	BCL2A1	protein_coding	104.836	3.25979	0.477874	6.82143	9.01358e-12	9.93047e-11
ENSG00000175611	9	95759231	95876049	-	LINC00476	lncRNA	89.0221	-2.7063	0.396745	-6.82125	9.02518e-12	9.93735e-11
ENSG00000039523	16	67518418	67546788	+	RIPOR1	protein_coding	229.721	2.36762	0.34712	6.82075	9.05646e-12	9.96587e-11
ENSG00000167460	19	16067021	16103002	+	TPM4	protein_coding	5585.73	1.75639	0.257513	6.8206	9.06626e-12	9.97073e-11
ENSG00000143437	1	150809713	150876708	-	ARNT	protein_coding	669.44	1.13483	0.166444	6.81808	9.22674e-12	1.01412e-10
ENSG00000182372	8	1755778	1801711	+	CLN8	protein_coding	404.647	1.46029	0.214266	6.81532	9.40545e-12	1.03315e-10
ENSG00000174243	12	48829756	48852842	-	DDX23	protein_coding	2013.01	-1.11867	0.1642	-6.81286	9.56785e-12	1.05037e-10
ENSG00000198722	9	35161992	35405338	+	UNC13B	protein_coding	1523.66	1.03855	0.152451	6.81236	9.60103e-12	1.05339e-10
ENSG00000198055	5	177403204	177442901	+	GRK6	protein_coding	250.495	1.65154	0.24245	6.81187	9.63404e-12	1.05638e-10
ENSG00000161057	7	103344254	103369395	+	PSMC2	protein_coding	1977.55	-1.29384	0.189985	-6.81024	9.7434e-12	1.06774e-10
ENSG00000160714	1	154548577	154559028	-	UBE2Q1	protein_coding	554.764	1.80588	0.265241	6.80846	9.86462e-12	1.07975e-10
ENSG00000174628	16	19716456	19858467	+	IQCK	protein_coding	845.506	-1.42334	0.209051	-6.80854	9.85942e-12	1.07975e-10
ENSG00000152443	19	57746815	57758148	+	ZNF776	protein_coding	164.369	-2.56556	0.377112	-6.80317	1.02342e-11	1.11954e-10
ENSG00000155366	1	112701106	112707434	-	RHOC	protein_coding	1205.19	1.35609	0.199355	6.80241	1.02882e-11	1.12479e-10
ENSG00000071553	X	154428645	154436516	+	ATP6AP1	protein_coding	1466.94	1.91285	0.281213	6.80211	1.03097e-11	1.12647e-10
ENSG00000112977	5	10679230	10761272	-	DAP	protein_coding	583.578	2.01777	0.296823	6.79791	1.06145e-11	1.15909e-10
ENSG00000170209	11	113387779	113400416	+	ANKK1	protein_coding	105.681	-2.81447	0.41403	-6.79774	1.06275e-11	1.15984e-10
ENSG00000050748	5	180233143	180292099	-	MAPK9	protein_coding	606.321	1.05026	0.154506	6.79755	1.06417e-11	1.16069e-10
ENSG00000165655	10	75397830	75401764	-	ZNF503	protein_coding	163.931	3.10723	0.457237	6.79567	1.07807e-11	1.17516e-10
ENSG00000122482	1	90915298	91022272	-	ZNF644	protein_coding	1142.08	-1.61158	0.23722	-6.79361	1.09359e-11	1.19138e-10
ENSG00000117362	1	150265399	150269580	-	APH1A	protein_coding	1130.54	1.52205	0.224109	6.79153	1.1095e-11	1.208e-10
ENSG00000012660	6	53267398	53349179	-	ELOVL5	protein_coding	3741.23	1.41841	0.208854	6.79137	1.11074e-11	1.20865e-10
ENSG00000169750	17	82031678	82034204	+	RAC3	protein_coding	73.8312	1.81104	0.266693	6.79073	1.11567e-11	1.21329e-10
ENSG00000179163	1	23845077	23868294	-	FUCA1	protein_coding	925.518	2.20456	0.324706	6.78941	1.12596e-11	1.22378e-10
ENSG00000237529	9	83272280	83279499	+	AL137847.2	lncRNA	41.2718	-4.85803	0.715624	-6.78852	1.13292e-11	1.23062e-10
ENSG00000090238	16	30092314	30096915	-	YPEL3	protein_coding	580.774	1.72723	0.254467	6.78765	1.13973e-11	1.23728e-10
ENSG00000278989	11	86434924	86437282	-	AP001148.1	TEC	17.9452	-7.28001	1.07262	-6.78712	1.14392e-11	1.24111e-10
ENSG00000064199	11	124673798	124697518	+	SPA17	protein_coding	333.652	-1.45132	0.213918	-6.78448	1.16507e-11	1.26332e-10
ENSG00000108106	19	55399745	55407788	-	UBE2S	protein_coding	173.799	2.23857	0.330066	6.7822	1.18359e-11	1.28265e-10
ENSG00000150756	5	10225507	10249897	-	ATPSCKMT	protein_coding	310.51	-1.68108	0.247897	-6.78137	1.19044e-11	1.28932e-10
ENSG00000123552	6	99432379	99521728	-	USP45	protein_coding	363.313	-1.30025	0.191866	-6.77689	1.22794e-11	1.32916e-10
ENSG00000188343	8	93698561	93731527	+	FAM92A	protein_coding	429.949	-1.31533	0.194113	-6.77608	1.23482e-11	1.33582e-10
ENSG00000076924	19	7619525	7629545	-	XAB2	protein_coding	292.2	1.71614	0.25337	6.77326	1.25914e-11	1.36055e-10
ENSG00000157796	4	39182504	39285810	+	WDR19	protein_coding	2407.36	-1.31643	0.194355	-6.77331	1.25865e-11	1.36055e-10
ENSG00000112981	5	138115175	138139443	-	NME5	protein_coding	1606.04	-1.27578	0.188397	-6.77176	1.27224e-11	1.37391e-10
ENSG00000082068	5	37379285	37753435	+	WDR70	protein_coding	570.082	-1.17159	0.173047	-6.77037	1.28457e-11	1.38641e-10
ENSG00000163739	4	73869393	73871308	+	CXCL1	protein_coding	1482.87	-2.3434	0.346228	-6.76838	1.30229e-11	1.40471e-10
ENSG00000170871	4	6781375	6884170	+	KIAA0232	protein_coding	1624.27	-1.0292	0.152063	-6.76824	1.30361e-11	1.40533e-10
ENSG00000081148	3	101222546	101320575	-	IMPG2	protein_coding	18.1488	-7.0616	1.04366	-6.76621	1.32203e-11	1.42435e-10
ENSG00000134851	4	55395957	55453397	+	TMEM165	protein_coding	3213.87	-1.06212	0.156978	-6.76604	1.32358e-11	1.42519e-10
ENSG00000135951	2	98997261	99154964	-	TSGA10	protein_coding	1752.98	-1.38302	0.204423	-6.76551	1.32841e-11	1.42956e-10
ENSG00000197961	19	9560353	9584533	-	ZNF121	protein_coding	852.06	1.13579	0.167896	6.76483	1.3347e-11	1.4355e-10
ENSG00000147155	X	48521799	48528716	+	EBP	protein_coding	340.051	1.61697	0.239098	6.76281	1.35343e-11	1.4548e-10
ENSG00000263002	19	44141554	44160313	+	ZNF234	protein_coding	162.58	-1.73436	0.256512	-6.76133	1.36734e-11	1.4689e-10
ENSG00000142794	1	21440128	21485005	+	NBPF3	protein_coding	184.099	-2.09762	0.310268	-6.76065	1.37372e-11	1.4749e-10
ENSG00000240342	12	118246084	118246962	+	RPS2P5	processed_pseudogene	853.717	1.88713	0.279149	6.7603	1.37707e-11	1.47764e-10
ENSG00000167766	19	52594060	52690496	-	ZNF83	protein_coding	1195.02	1.37813	0.203885	6.75936	1.386e-11	1.48636e-10
ENSG00000172748	8	232137	264703	+	ZNF596	protein_coding	99.7308	-3.09218	0.457489	-6.75902	1.38928e-11	1.48902e-10
ENSG00000151065	12	1946053	2004535	-	DCP1B	protein_coding	238.454	-1.98665	0.293963	-6.75817	1.39744e-11	1.4969e-10
ENSG00000175536	11	74490519	74493724	-	LIPT2	protein_coding	25.7084	-5.78216	0.855771	-6.75667	1.41198e-11	1.51161e-10
ENSG00000160752	1	155308748	155320666	+	FDPS	protein_coding	831.212	1.69136	0.250332	6.75647	1.41392e-11	1.5128e-10
ENSG00000140374	15	76215353	76311472	-	ETFA	protein_coding	1328.02	1.01657	0.150487	6.75521	1.42629e-11	1.52516e-10
ENSG00000053770	14	57268924	57298742	+	AP5M1	protein_coding	1419.52	-1.69579	0.251092	-6.75365	1.44172e-11	1.54077e-10
ENSG00000254884	11	9311284	9311689	-	PRR13P2	processed_pseudogene	22.2234	4.82011	0.713732	6.75339	1.44428e-11	1.54262e-10
ENSG00000108384	17	58692573	58735611	+	RAD51C	protein_coding	231.681	-1.62843	0.241163	-6.75242	1.45395e-11	1.55099e-10
ENSG00000128536	7	105876796	106036432	+	CDHR3	protein_coding	3565.54	-1.34785	0.199612	-6.75236	1.45463e-11	1.55099e-10
ENSG00000164187	5	36098407	36151887	-	LMBRD2	protein_coding	671.914	-1.414	0.209408	-6.75238	1.45437e-11	1.55099e-10
ENSG00000116922	1	37681570	37692249	-	C1orf109	protein_coding	166.406	-2.25091	0.333368	-6.75202	1.45804e-11	1.55373e-10
ENSG00000141579	17	82829434	82840022	-	ZNF750	protein_coding	611.23	2.06665	0.30624	6.74848	1.49406e-11	1.5912e-10
ENSG00000135999	2	148644440	148787569	+	EPC2	protein_coding	219.825	-1.36468	0.202231	-6.74812	1.49768e-11	1.59414e-10
ENSG00000134830	19	47332175	47347329	+	C5AR2	protein_coding	28.5226	7.88921	1.16919	6.74757	1.50343e-11	1.59935e-10
ENSG00000075673	13	24680411	24712493	+	ATP12A	protein_coding	11768.9	1.67204	0.247872	6.7456	1.52398e-11	1.62027e-10
ENSG00000132823	20	44195939	44210771	-	OSER1	protein_coding	1300.97	1.45781	0.216164	6.74399	1.54099e-11	1.63742e-10
ENSG00000168496	11	61792911	61797238	+	FEN1	protein_coding	151.759	-2.26085	0.335352	-6.74171	1.56538e-11	1.66238e-10
ENSG00000247081	8	103153394	103298772	-	BAALC-AS1	lncRNA	291.636	-1.87097	0.27753	-6.74152	1.56738e-11	1.66355e-10
ENSG00000115998	2	70149880	70248615	-	C2orf42	protein_coding	307.452	-1.44552	0.214476	-6.73979	1.58619e-11	1.68256e-10
ENSG00000252759	2	200863152	200863247	-	AC005037.2	misc_RNA	38.0336	4.99058	0.740665	6.73797	1.60612e-11	1.70272e-10
ENSG00000159658	1	46675159	46719114	-	EFCAB14	protein_coding	1947.24	1.26815	0.188248	6.73659	1.62151e-11	1.71806e-10
ENSG00000197937	19	53124072	53159075	-	ZNF347	protein_coding	140.424	-2.2274	0.330765	-6.7341	1.64946e-11	1.74667e-10
ENSG00000082781	3	124761948	124901418	-	ITGB5	protein_coding	389.654	3.08866	0.458694	6.73361	1.65509e-11	1.75064e-10
ENSG00000111731	12	22448583	22544546	-	C2CD5	protein_coding	1076.83	-1.26895	0.188449	-6.73365	1.65454e-11	1.75064e-10
ENSG00000014216	11	65180566	65212006	+	CAPN1	protein_coding	3022.64	1.99416	0.296158	6.73341	1.65729e-11	1.75196e-10
ENSG00000134152	15	34140674	34210096	-	KATNBL1	protein_coding	797.473	1.00965	0.149963	6.73268	1.66568e-11	1.75983e-10
ENSG00000162496	1	12567910	12618210	-	DHRS3	protein_coding	2975.9	1.59161	0.2365	6.72982	1.69871e-11	1.79371e-10
ENSG00000131373	3	15560699	15601852	-	HACL1	protein_coding	483.839	-1.73723	0.258142	-6.72974	1.69971e-11	1.79374e-10
ENSG00000011347	11	61513714	61581148	-	SYT7	protein_coding	147.963	3.06391	0.455287	6.72963	1.70098e-11	1.79406e-10
ENSG00000126705	1	27534035	27604431	-	AHDC1	protein_coding	701.748	1.74599	0.259454	6.72946	1.70295e-11	1.79431e-10
ENSG00000177994	2	54330034	54383742	+	C2orf73	protein_coding	403.216	-1.52035	0.225925	-6.72944	1.70315e-11	1.79431e-10
ENSG00000083535	13	72782133	73016461	+	PIBF1	protein_coding	1082	-1.22269	0.181732	-6.72802	1.71991e-11	1.81093e-10
ENSG00000269825	19	52650437	52653284	-	AC022150.4	lncRNA	107.415	1.82423	0.27115	6.72775	1.72304e-11	1.8132e-10
ENSG00000178665	7	55887456	55942530	+	ZNF713	protein_coding	64.7921	-2.04646	0.304305	-6.72504	1.7555e-11	1.84631e-10
ENSG00000152926	7	64971772	65006684	-	ZNF117	protein_coding	801.611	-1.7434	0.259278	-6.72407	1.76717e-11	1.85753e-10
ENSG00000166130	12	98613405	98645113	-	IKBIP	protein_coding	164.99	-1.97927	0.294425	-6.72249	1.7864e-11	1.87668e-10
ENSG00000107890	10	26991914	27100498	-	ANKRD26	protein_coding	565.441	-1.13274	0.168528	-6.72138	1.80007e-11	1.88997e-10
ENSG00000067177	X	72578814	72714319	-	PHKA1	protein_coding	513.735	0.980973	0.145956	6.72104	1.80435e-11	1.8934e-10
ENSG00000072201	4	53459301	53701405	-	LNX1	protein_coding	743.92	1.06883	0.159036	6.72069	1.80864e-11	1.89682e-10
ENSG00000005194	16	57428187	57447420	-	CIAPIN1	protein_coding	709.952	-1.27518	0.189811	-6.71814	1.84058e-11	1.92901e-10
ENSG00000108244	17	40922700	40937646	-	KRT23	protein_coding	4300.98	1.66521	0.24787	6.71807	1.84141e-11	1.92901e-10
ENSG00000092330	14	24239643	24242674	-	TINF2	protein_coding	616.286	1.20366	0.179239	6.71539	1.87561e-11	1.96372e-10
ENSG00000084234	11	130068147	130144811	+	APLP2	protein_coding	10927	1.67855	0.250076	6.71218	1.91742e-11	2.00636e-10
ENSG00000118369	11	78188812	78215232	+	USP35	protein_coding	304.425	2.32769	0.346796	6.71197	1.92016e-11	2.0081e-10
ENSG00000135631	2	73073382	73156721	-	RAB11FIP5	protein_coding	346.679	2.48658	0.370488	6.71162	1.92469e-11	2.01171e-10
ENSG00000113638	5	40512333	40755963	-	TTC33	protein_coding	488.331	-1.5782	0.235164	-6.71107	1.93208e-11	2.01829e-10
ENSG00000241258	7	66114604	66154568	+	CRCP	protein_coding	366.201	-1.18833	0.177106	-6.70971	1.95018e-11	2.03605e-10
ENSG00000130939	1	10032832	10181239	+	UBE4B	protein_coding	490.323	1.56848	0.233839	6.70751	1.97969e-11	2.0657e-10
ENSG00000228486	2	97664217	97703064	+	C2orf92	protein_coding	189.697	-2.04208	0.304474	-6.7069	1.98799e-11	2.07319e-10
ENSG00000129518	14	34515938	34539711	-	EAPP	protein_coding	873.976	-1.44222	0.215066	-6.70593	2.00126e-11	2.08586e-10
ENSG00000245498	11	124800424	124834487	+	AP000866.1	lncRNA	83.7637	-2.78083	0.414868	-6.70293	2.04285e-11	2.128e-10
ENSG00000258667	14	61707564	61751099	-	HIF1A-AS3	lncRNA	170.149	2.57891	0.384756	6.70271	2.04589e-11	2.12998e-10
ENSG00000114573	3	113747033	113812056	+	ATP6V1A	protein_coding	2398.39	0.655378	0.0978094	6.70057	2.07615e-11	2.16027e-10
ENSG00000006327	16	3018445	3022383	+	TNFRSF12A	protein_coding	843.632	2.74236	0.409386	6.69871	2.10268e-11	2.18542e-10
ENSG00000188738	2	185738804	185833290	+	FSIP2	protein_coding	68.6655	-2.57743	0.384763	-6.69875	2.10205e-11	2.18542e-10
ENSG00000123977	2	227871054	227924344	+	DAW1	protein_coding	1244.2	-1.60772	0.240062	-6.69709	2.12608e-11	2.2085e-10
ENSG00000182993	12	14803666	14906586	+	C12orf60	protein_coding	48.5093	-3.47093	0.518335	-6.6963	2.13756e-11	2.21919e-10
ENSG00000116667	1	184387029	184629019	+	C1orf21	protein_coding	566.637	1.31394	0.196233	6.69583	2.14456e-11	2.22521e-10
ENSG00000133477	22	39994954	40043534	+	FAM83F	protein_coding	706.018	1.497	0.223648	6.69358	2.17773e-11	2.25836e-10
ENSG00000263528	1	206470476	206496889	+	IKBKE	protein_coding	269.159	-2.31956	0.346581	-6.6927	2.19096e-11	2.27081e-10
ENSG00000125945	1	23359448	23369836	-	ZNF436	protein_coding	799.535	-1.53833	0.229877	-6.69197	2.20188e-11	2.28086e-10
ENSG00000160191	21	42653621	42775509	+	PDE9A	protein_coding	172.388	2.71134	0.405215	6.69113	2.21454e-11	2.29268e-10
ENSG00000171443	19	55600022	55603138	+	ZNF524	protein_coding	115.534	2.31768	0.346464	6.68952	2.23902e-11	2.31673e-10
ENSG00000148444	10	22316386	22320306	+	COMMD3	protein_coding	142.238	-1.9374	0.289761	-6.68622	2.29015e-11	2.36831e-10
ENSG00000198331	11	125883614	125900648	+	HYLS1	protein_coding	201.103	-3.15486	0.471898	-6.68547	2.30191e-11	2.37915e-10
ENSG00000068745	3	48688003	48740353	-	IP6K2	protein_coding	1779.36	-1.11323	0.166534	-6.68472	2.31361e-11	2.38992e-10
ENSG00000162734	1	160205337	160215376	+	PEA15	protein_coding	663.012	1.81904	0.272263	6.68121	2.36977e-11	2.44603e-10
ENSG00000175054	3	142449007	142578733	-	ATR	protein_coding	1860.14	-1.22357	0.183138	-6.68116	2.37057e-11	2.44603e-10
ENSG00000171595	17	74274234	74314884	+	DNAI2	protein_coding	776.987	-1.28925	0.193002	-6.67999	2.38959e-11	2.46428e-10
ENSG00000233834	7	20217577	20221700	+	AC005083.1	lncRNA	206.128	-2.00031	0.299493	-6.67898	2.40617e-11	2.48e-10
ENSG00000268912	19	58428632	58431148	-	AC012313.5	lncRNA	106.134	-2.31881	0.347314	-6.67641	2.44861e-11	2.52234e-10
ENSG00000161638	12	54395261	54419266	-	ITGA5	protein_coding	560.116	4.17496	0.625405	6.6756	2.46216e-11	2.53489e-10
ENSG00000129353	19	10602457	10644557	+	SLC44A2	protein_coding	1555.41	1.26206	0.189083	6.67462	2.4787e-11	2.5505e-10
ENSG00000143761	1	228082660	228099212	+	ARF1	protein_coding	4538.49	1.30681	0.195807	6.67399	2.48943e-11	2.56012e-10
ENSG00000099995	22	30331988	30356919	-	SF3A1	protein_coding	526.788	2.15412	0.322829	6.67263	2.5126e-11	2.58251e-10
ENSG00000138942	22	31160182	31207019	+	RNF185	protein_coding	637.499	-0.970252	0.145416	-6.67226	2.51897e-11	2.58763e-10
ENSG00000166167	10	101354033	101557321	+	BTRC	protein_coding	714.762	-1.20771	0.18103	-6.67134	2.53476e-11	2.60241e-10
ENSG00000138829	5	128257909	128659185	-	FBN2	protein_coding	82.6213	-3.61674	0.542264	-6.66972	2.56299e-11	2.62994e-10
ENSG00000224347	13	77599755	77606551	-	SCEL-AS1	lncRNA	19.8867	6.47897	0.971831	6.66677	2.61499e-11	2.68181e-10
ENSG00000167840	17	5105541	5123116	-	ZNF232	protein_coding	247.59	-1.74832	0.262295	-6.66548	2.63797e-11	2.70378e-10
ENSG00000196263	19	56507850	56530221	+	ZNF471	protein_coding	250.179	-1.33933	0.200937	-6.66541	2.63933e-11	2.70378e-10
ENSG00000100078	22	31134807	31140508	-	PLA2G3	protein_coding	49.9464	4.43003	0.664909	6.66261	2.69001e-11	2.75418e-10
ENSG00000139517	13	27545913	27620529	-	LNX2	protein_coding	589.788	1.33955	0.201158	6.65921	2.75296e-11	2.81707e-10
ENSG00000263874	17	38925168	38929384	+	LINC00672	protein_coding	23.6344	-7.11062	1.06787	-6.65868	2.76303e-11	2.82582e-10
ENSG00000162545	1	20482391	20486210	-	CAMK2N1	protein_coding	253.513	2.88436	0.433232	6.65776	2.78032e-11	2.84194e-10
ENSG00000122085	2	241072169	241102332	-	MTERF4	protein_coding	266.718	-1.96713	0.295537	-6.65613	2.81124e-11	2.87196e-10
ENSG00000174502	1	205913048	205943460	-	SLC26A9	protein_coding	49.1804	4.33056	0.650856	6.65364	2.85922e-11	2.91937e-10
ENSG00000281406	1	205434885	205457091	-	BLACAT1	protein_coding	144.427	2.08142	0.312832	6.65347	2.86264e-11	2.92124e-10
ENSG00000187778	12	49556544	49568145	-	MCRS1	protein_coding	440.804	-1.38543	0.208255	-6.65254	2.88075e-11	2.9365e-10
ENSG00000196611	11	102789919	102798160	-	MMP1	protein_coding	1278.62	3.56846	0.5364	6.6526	2.8795e-11	2.9365e-10
ENSG00000142235	19	48485271	48513935	-	LMTK3	protein_coding	324.848	1.87207	0.281449	6.65156	2.90003e-11	2.95452e-10
ENSG00000138078	2	44316281	44361862	-	PREPL	protein_coding	1694.94	-1.35297	0.203424	-6.65099	2.91126e-11	2.96434e-10
ENSG00000104805	19	48900312	48923372	+	NUCB1	protein_coding	770.551	1.91546	0.288002	6.65088	2.91348e-11	2.96497e-10
ENSG00000141985	19	4360370	4400547	-	SH3GL1	protein_coding	799.569	2.14976	0.32325	6.65045	2.92189e-11	2.97189e-10
ENSG00000197555	14	71320449	71741229	+	SIPA1L1	protein_coding	646.433	1.19814	0.180275	6.64617	3.00812e-11	3.05793e-10
ENSG00000174446	15	66490135	66497780	-	SNAPC5	protein_coding	305.656	-1.47186	0.221473	-6.64576	3.0165e-11	3.06385e-10
ENSG00000233912	3	5156905	5187329	-	AC026202.2	lncRNA	24.9047	3.88993	0.585327	6.64573	3.01726e-11	3.06385e-10
ENSG00000258846	12	96900697	96902698	-	EEF1A1P33	processed_pseudogene	16.224	-7.20237	1.08393	-6.64469	3.03857e-11	3.08381e-10
ENSG00000001497	X	65512582	65534775	-	LAS1L	protein_coding	566.499	-1.08868	0.163878	-6.64322	3.06902e-11	3.11301e-10
ENSG00000106049	7	27525442	27662883	-	HIBADH	protein_coding	1156.34	0.922716	0.138904	6.64282	3.07742e-11	3.11982e-10
ENSG00000162694	1	100872372	100895179	-	EXTL2	protein_coding	302.156	-2.33922	0.352166	-6.64238	3.08651e-11	3.12733e-10
ENSG00000077312	19	40750637	40765389	+	SNRPA	protein_coding	319.244	1.35396	0.203844	6.64213	3.0918e-11	3.12927e-10
ENSG00000188522	17	18968789	19004764	-	FAM83G	protein_coding	292.489	2.07622	0.31258	6.64219	3.09047e-11	3.12927e-10
ENSG00000279382	17	76090308	76091669	+	AC018665.1	TEC	55.0728	-2.84018	0.427617	-6.64189	3.0969e-11	3.13272e-10
ENSG00000228140	1	15402979	15409433	-	AL031283.1	lncRNA	34.2503	-4.16804	0.627754	-6.6396	3.14543e-11	3.18008e-10
ENSG00000155545	5	56919602	56971675	-	MIER3	protein_coding	804.699	-1.44277	0.217427	-6.63565	3.23078e-11	3.26459e-10
ENSG00000070526	17	76624761	76643786	-	ST6GALNAC1	protein_coding	3069.7	-1.1397	0.17176	-6.63542	3.23585e-11	3.26793e-10
ENSG00000143748	1	224227334	224330189	-	NVL	protein_coding	424.936	-1.53887	0.231964	-6.63406	3.26574e-11	3.29631e-10
ENSG00000039139	5	13690331	13944543	-	DNAH5	protein_coding	2579.47	-1.29822	0.195703	-6.63364	3.27504e-11	3.30391e-10
ENSG00000197044	19	11767000	11784078	+	ZNF441	protein_coding	140.651	-2.32483	0.350586	-6.63128	3.3279e-11	3.35541e-10
ENSG00000132600	16	68310974	68358563	+	PRMT7	protein_coding	317.862	-1.43968	0.217135	-6.63036	3.34862e-11	3.37447e-10
ENSG00000105220	19	34359480	34402413	+	GPI	protein_coding	1579.9	1.41372	0.213251	6.62937	3.37112e-11	3.39529e-10
ENSG00000034510	2	84905656	84906671	+	TMSB10	protein_coding	6742.85	1.7001	0.256457	6.6292	3.37514e-11	3.39749e-10
ENSG00000148680	10	90740823	90858039	-	HTR7	protein_coding	142.788	1.97597	0.298174	6.62688	3.42848e-11	3.44931e-10
ENSG00000084463	12	14784582	14803486	-	WBP11	protein_coding	643.44	1.32842	0.200532	6.62447	3.48486e-11	3.50414e-10
ENSG00000257354	12	62602752	62622213	+	AC048341.1	lncRNA	27.4355	-7.46951	1.128	-6.62193	3.54538e-11	3.56306e-10
ENSG00000213799	19	53333749	53356906	+	ZNF845	protein_coding	222.301	-1.90126	0.287128	-6.62166	3.55194e-11	3.56772e-10
ENSG00000177666	11	818914	825573	+	PNPLA2	protein_coding	623.102	1.79407	0.270976	6.62079	3.5729e-11	3.58683e-10
ENSG00000148950	11	31432401	31509645	-	IMMP1L	protein_coding	72.0658	-2.55221	0.385521	-6.62017	3.58796e-11	3.6e-10
ENSG00000184232	11	120211032	120230334	+	OAF	protein_coding	225.697	1.95421	0.295252	6.6188	3.62119e-11	3.63138e-10
ENSG00000117523	1	171485551	171593511	+	PRRC2C	protein_coding	3637.1	1.01306	0.153068	6.61836	3.63206e-11	3.64031e-10
ENSG00000186660	11	58579063	58621550	+	ZFP91	protein_coding	1318.25	1.05859	0.159981	6.61696	3.66656e-11	3.6729e-10
ENSG00000184995	9	21480839	21482313	-	IFNE	protein_coding	55.9134	-3.82162	0.577725	-6.61494	3.71693e-11	3.72135e-10
ENSG00000237491	1	778747	810065	+	LINC01409	lncRNA	35.0158	-5.12201	0.774344	-6.61464	3.72458e-11	3.72699e-10
ENSG00000134686	1	33323623	33431052	-	PHC2	protein_coding	485.102	1.92138	0.290488	6.61433	3.73233e-11	3.73273e-10
ENSG00000182704	11	76782251	76798153	+	TSKU	protein_coding	794.184	2.81022	0.424903	6.6138	3.7459e-11	3.74428e-10
ENSG00000110675	11	107591091	107666779	+	ELMOD1	protein_coding	87.1695	-3.02638	0.457632	-6.61312	3.76301e-11	3.75936e-10
ENSG00000140527	15	89690811	89743638	+	WDR93	protein_coding	344.255	-2.09075	0.316169	-6.61277	3.77204e-11	3.76635e-10
ENSG00000187866	9	68780065	68785566	+	FAM122A	protein_coding	238.523	-1.39048	0.210279	-6.61255	3.77762e-11	3.76989e-10
ENSG00000204428	6	31676684	31684040	-	LY6G5C	protein_coding	32.2949	-3.70988	0.561132	-6.61142	3.80643e-11	3.7966e-10
ENSG00000281490	7	128655962	128658791	-	CICP14	processed_pseudogene	184.81	-2.40874	0.364399	-6.61017	3.83873e-11	3.82676e-10
ENSG00000050820	16	75228181	75268053	-	BCAR1	protein_coding	577.127	1.50471	0.227648	6.60981	3.84818e-11	3.83412e-10
ENSG00000123240	10	13099449	13138308	+	OPTN	protein_coding	2199.64	1.49448	0.22614	6.60866	3.87808e-11	3.86028e-10
ENSG00000146701	7	76048051	76067508	+	MDH2	protein_coding	2739.63	1.10443	0.16712	6.60864	3.87861e-11	3.86028e-10
ENSG00000136367	14	23520857	23556192	-	ZFHX2	protein_coding	332.703	-2.15146	0.325594	-6.60778	3.90122e-11	3.88071e-10
ENSG00000159445	1	151870866	151909637	-	THEM4	protein_coding	154.752	-1.83784	0.278147	-6.60744	3.91016e-11	3.88752e-10
ENSG00000081014	15	50908672	51005895	+	AP4E1	protein_coding	261.035	-1.33567	0.202187	-6.60612	3.94528e-11	3.92033e-10
ENSG00000253522	5	160438594	160487426	+	MIR3142HG	lncRNA	24.4545	-6.99041	1.05903	-6.60079	4.08963e-11	4.06159e-10
ENSG00000085721	16	15060022	15094317	-	RRN3	protein_coding	1093.76	-1.24105	0.18805	-6.59958	4.12318e-11	4.09272e-10
ENSG00000106829	9	79571773	79726882	+	TLE4	protein_coding	437.669	1.37989	0.209184	6.59655	4.20842e-11	4.1751e-10
ENSG00000153201	2	108719482	108785809	+	RANBP2	protein_coding	4947.24	-1.36881	0.207542	-6.59535	4.24264e-11	4.20679e-10
ENSG00000132485	1	71063291	71081289	-	ZRANB2	protein_coding	1744.17	-1.14787	0.174089	-6.59358	4.29335e-11	4.2548e-10
ENSG00000136243	7	23181841	23201011	+	NUP42	protein_coding	296.185	-1.84428	0.279727	-6.59314	4.30625e-11	4.2653e-10
ENSG00000183762	22	29073078	29168333	+	KREMEN1	protein_coding	343.548	2.2807	0.345962	6.59234	4.32944e-11	4.28599e-10
ENSG00000137070	9	34650702	34661892	+	IL11RA	protein_coding	29.9654	-5.53003	0.83901	-6.59114	4.36475e-11	4.31863e-10
ENSG00000065320	17	9021510	9244000	+	NTN1	protein_coding	485.977	2.85951	0.433898	6.59028	4.38991e-11	4.34121e-10
ENSG00000160741	1	153947669	153958615	-	CRTC2	protein_coding	399.586	1.54361	0.23431	6.58788	4.46145e-11	4.40961e-10
ENSG00000152147	2	38751534	38785002	+	GEMIN6	protein_coding	238.129	-1.63988	0.248952	-6.58714	4.48372e-11	4.42926e-10
ENSG00000185033	15	90160604	90229679	+	SEMA4B	protein_coding	2654.78	1.70716	0.259197	6.58633	4.50846e-11	4.45133e-10
ENSG00000142961	1	46607715	46616891	-	MOB3C	protein_coding	339.706	1.60996	0.244474	6.58539	4.53688e-11	4.477e-10
ENSG00000138380	2	202912214	202988263	+	CARF	protein_coding	346.2	-1.63478	0.248249	-6.58523	4.5419e-11	4.47957e-10
ENSG00000155115	6	110958706	110967890	+	GTF3C6	protein_coding	606.981	-1.43884	0.218508	-6.58485	4.5535e-11	4.48863e-10
ENSG00000013306	17	44319625	44324870	-	SLC25A39	protein_coding	1090.06	1.45318	0.22069	6.58471	4.55789e-11	4.49057e-10
ENSG00000187758	4	99276369	99291003	-	ADH1A	protein_coding	28.1694	-5.27452	0.801326	-6.58224	4.63418e-11	4.5633e-10
ENSG00000158850	1	161171310	161177968	-	B4GALT3	protein_coding	403.885	1.46817	0.223063	6.58186	4.64612e-11	4.57263e-10
ENSG00000181192	10	12068954	12123221	+	DHTKD1	protein_coding	234.967	1.45208	0.220639	6.58124	4.66532e-11	4.58762e-10
ENSG00000196365	19	5691834	5720572	-	LONP1	protein_coding	428.094	1.8441	0.280206	6.58121	4.6663e-11	4.58762e-10
ENSG00000231770	3	194584004	194590260	+	TMEM44-AS1	lncRNA	61.8515	-4.07454	0.619165	-6.58071	4.68204e-11	4.60066e-10
ENSG00000260183	16	80547842	80552514	-	AC108097.1	lncRNA	29.7474	-4.8689	0.740103	-6.57868	4.74632e-11	4.66135e-10
ENSG00000163481	2	218663892	218672002	-	RNF25	protein_coding	218.923	-1.67574	0.254743	-6.57815	4.76326e-11	4.67551e-10
ENSG00000141854	19	14072536	14075062	+	MISP3	protein_coding	148.271	1.80769	0.274849	6.57703	4.79945e-11	4.70854e-10
ENSG00000110400	11	119623408	119729200	-	NECTIN1	protein_coding	1584.81	2.08841	0.31775	6.57249	4.94816e-11	4.85187e-10
ENSG00000171806	1	169792529	169794963	-	METTL18	protein_coding	113.921	-3.24305	0.493573	-6.57056	5.01255e-11	4.9124e-10
ENSG00000155085	6	109492856	109691217	-	AK9	protein_coding	1812.54	-1.4746	0.224505	-6.56824	5.09145e-11	4.9871e-10
ENSG00000058091	7	90466424	91210590	+	CDK14	protein_coding	250.972	1.19126	0.181376	6.56792	5.10229e-11	4.99508e-10
ENSG00000149262	11	77878720	77994671	-	INTS4	protein_coding	461.93	-1.12705	0.171614	-6.56738	5.12078e-11	5.01053e-10
ENSG00000261366	6	95575183	95577450	-	MANEA-DT	lncRNA	25.7824	-3.84647	0.585964	-6.56436	5.22585e-11	5.11064e-10
ENSG00000105643	19	18001132	18014102	+	ARRDC2	protein_coding	240.05	2.14137	0.326228	6.56402	5.2375e-11	5.11933e-10
ENSG00000261136	15	39782571	39785617	+	AC023908.3	lncRNA	15.543	-7.0208	1.06981	-6.56268	5.28509e-11	5.16313e-10
ENSG00000073150	22	50170731	50180295	+	PANX2	protein_coding	110.141	3.56347	0.543053	6.56191	5.31238e-11	5.18705e-10
ENSG00000116120	2	222566899	222656092	-	FARSB	protein_coding	668.061	-1.28945	0.196526	-6.56124	5.33627e-11	5.20764e-10
ENSG00000134215	1	107571161	107965180	-	VAV3	protein_coding	1213.58	-2.70066	0.411775	-6.55858	5.4324e-11	5.29866e-10
ENSG00000179335	15	74598500	74645414	+	CLK3	protein_coding	811.084	1.26057	0.192238	6.55736	5.47676e-11	5.33913e-10
ENSG00000169220	5	177357924	177372596	+	RGS14	protein_coding	214.177	1.9294	0.294285	6.55623	5.51839e-11	5.37687e-10
ENSG00000183513	2	98599314	98608515	-	COA5	protein_coding	535.776	-1.2852	0.196076	-6.55461	5.57875e-11	5.43284e-10
ENSG00000261596	16	21626742	21627569	+	AC005632.3	lncRNA	27.2477	4.16457	0.635498	6.55323	5.63047e-11	5.48032e-10
ENSG00000171262	15	38454127	38487710	+	FAM98B	protein_coding	573.102	-1.38404	0.211224	-6.55248	5.65888e-11	5.50508e-10
ENSG00000117643	1	25617468	25786207	+	MAN1C1	protein_coding	191.986	2.24506	0.342688	6.55133	5.70255e-11	5.54466e-10
ENSG00000010256	3	48599002	48610976	-	UQCRC1	protein_coding	2866.49	1.12794	0.172173	6.5512	5.70776e-11	5.54682e-10
ENSG00000152527	2	43637260	43767987	+	PLEKHH2	protein_coding	292.27	1.49108	0.227647	6.54997	5.7547e-11	5.58951e-10
ENSG00000147874	9	19053141	19102904	-	HAUS6	protein_coding	472.653	-1.6369	0.249925	-6.54955	5.77122e-11	5.60261e-10
ENSG00000058085	1	183186238	183245127	+	LAMC2	protein_coding	11667.4	2.40314	0.367093	6.54639	5.89449e-11	5.71929e-10
ENSG00000151881	5	43444252	43483893	-	TMEM267	protein_coding	279.802	-1.39997	0.213914	-6.54457	5.96679e-11	5.78642e-10
ENSG00000169989	4	152769354	152779730	-	TIGD4	protein_coding	103.646	-2.29974	0.351427	-6.544	5.98932e-11	5.8022e-10
ENSG00000196411	7	100802565	100827523	-	EPHB4	protein_coding	436.347	1.92161	0.293643	6.54404	5.98775e-11	5.8022e-10
ENSG00000167705	17	1646145	1649866	-	RILP	protein_coding	138.021	1.70796	0.261012	6.54362	6.00465e-11	5.81401e-10
ENSG00000100207	22	42160013	42343616	-	TCF20	protein_coding	709.142	1.37656	0.210379	6.54323	6.02051e-11	5.82328e-10
ENSG00000114737	3	50606490	50611831	-	CISH	protein_coding	49.4039	3.35594	0.512884	6.54328	6.01855e-11	5.82328e-10
ENSG00000099992	22	30291990	30327046	-	TBC1D10A	protein_coding	184.283	1.83421	0.280332	6.54299	6.02991e-11	5.82933e-10
ENSG00000186716	22	23179704	23318037	+	BCR	protein_coding	884.138	2.13995	0.327076	6.54266	6.04332e-11	5.83925e-10
ENSG00000103044	16	69105653	69118719	+	HAS3	protein_coding	1037.91	2.15984	0.330372	6.53758	6.25216e-11	6.03668e-10
ENSG00000269439	19	17488990	17511889	-	AC010618.3	lncRNA	82.8799	2.66345	0.407409	6.53753	6.25416e-11	6.03668e-10
ENSG00000184307	3	113947901	113965401	+	ZDHHC23	protein_coding	335.174	-1.35886	0.207947	-6.53462	6.37733e-11	6.15237e-10
ENSG00000196247	7	64666083	64711582	+	ZNF107	protein_coding	200.205	-2.71067	0.414861	-6.53394	6.40629e-11	6.17709e-10
ENSG00000186806	19	51331536	51342124	-	VSIG10L	protein_coding	113.614	2.75185	0.421184	6.53361	6.42017e-11	6.18726e-10
ENSG00000240859	7	149549	155465	+	AC093627.4	lncRNA	51.5827	-3.24765	0.497335	-6.5301	6.57257e-11	6.33083e-10
ENSG00000170468	14	73490933	73493394	+	RIOX1	protein_coding	82.3564	-2.08529	0.319354	-6.52973	6.58873e-11	6.34311e-10
ENSG00000161798	12	49961872	49965682	+	AQP5	protein_coding	5405.16	3.50338	0.536551	6.52944	6.60149e-11	6.35209e-10
ENSG00000157020	3	10293131	10321112	-	SEC13	protein_coding	965.657	1.06217	0.162759	6.52605	6.75265e-11	6.49417e-10
ENSG00000069345	16	46955362	46973674	-	DNAJA2	protein_coding	1454.49	1.28039	0.196233	6.52486	6.8065e-11	6.54257e-10
ENSG00000130312	19	17292609	17306843	+	MRPL34	protein_coding	368.82	1.54624	0.237081	6.52201	6.93712e-11	6.66467e-10
ENSG00000055208	6	149218641	149411613	+	TAB2	protein_coding	1270.71	1.20208	0.184337	6.52109	6.97963e-11	6.70204e-10
ENSG00000100934	14	39031919	39109646	-	SEC23A	protein_coding	1234.06	1.14506	0.175599	6.52089	6.9892e-11	6.70775e-10
ENSG00000150760	10	126905409	127452517	+	DOCK1	protein_coding	549.681	1.06527	0.16337	6.5206	7.00283e-11	6.71736e-10
ENSG00000102543	13	49247925	49293485	+	CDADC1	protein_coding	253.587	-1.39383	0.213786	-6.51974	7.04304e-11	6.75243e-10
ENSG00000147642	8	109573978	109691791	-	SYBU	protein_coding	743.392	-1.2276	0.188292	-6.51964	7.04784e-11	6.75355e-10
ENSG00000274523	7	75027122	75074228	-	RCC1L	protein_coding	722.556	1.54216	0.236545	6.51952	7.05335e-11	6.75533e-10
ENSG00000103512	16	14833721	14896157	+	NOMO1	protein_coding	739.154	2.18053	0.334489	6.51899	7.07817e-11	6.7756e-10
ENSG00000082516	5	154887411	154938211	-	GEMIN5	protein_coding	304.174	-1.23183	0.188985	-6.51814	7.11829e-11	6.81049e-10
ENSG00000120963	8	101177878	101206193	-	ZNF706	protein_coding	651.991	1.01356	0.155529	6.51688	7.1787e-11	6.86475e-10
ENSG00000131779	1	145911350	145918717	-	PEX11B	protein_coding	518.291	-1.35638	0.20821	-6.51448	7.29417e-11	6.97157e-10
ENSG00000284052	2	190607660	190649840	-	AC006460.2	lncRNA	17.3774	-7.10404	1.09071	-6.51323	7.35537e-11	7.02644e-10
ENSG00000176845	17	83079609	83095122	+	METRNL	protein_coding	310.209	2.40182	0.3688	6.51253	7.38931e-11	7.05523e-10
ENSG00000036257	2	224470150	224585397	-	CUL3	protein_coding	922.822	1.27346	0.195554	6.51206	7.41247e-11	7.0737e-10
ENSG00000161654	17	44034328	44067619	-	LSM12	protein_coding	434.058	1.25791	0.193299	6.50762	7.635e-11	7.28231e-10
ENSG00000156253	21	29004384	29019360	-	RWDD2B	protein_coding	357.437	-1.40106	0.215316	-6.50699	7.66695e-11	7.30903e-10
ENSG00000204116	X	73563200	73687102	+	CHIC1	protein_coding	230.953	-1.40023	0.215198	-6.5067	7.68207e-11	7.31968e-10
ENSG00000283361	13	114154691	114223084	+	CFAP97D2	protein_coding	319.966	-2.20682	0.339192	-6.50609	7.71333e-11	7.34569e-10
ENSG00000148120	9	94726701	95087218	+	AOPEP	protein_coding	972.263	-1.19423	0.183563	-6.50582	7.72711e-11	7.35503e-10
ENSG00000142784	1	27234632	27308636	+	WDTC1	protein_coding	807.252	1.66766	0.256448	6.50291	7.87804e-11	7.49485e-10
ENSG00000204386	6	31857659	31862822	-	NEU1	protein_coding	1053.99	1.49616	0.230095	6.50235	7.90771e-11	7.51922e-10
ENSG00000270127	15	100547765	100550153	-	AC027020.2	lncRNA	21.2738	-7.23338	1.11262	-6.50124	7.96628e-11	7.57103e-10
ENSG00000121931	1	110947190	110963965	-	LRIF1	protein_coding	478.434	-1.22303	0.188139	-6.50068	7.99559e-11	7.5911e-10
ENSG00000137522	11	71929018	71997597	+	RNF121	protein_coding	246.895	-1.4453	0.222331	-6.5007	7.9949e-11	7.5911e-10
ENSG00000164823	8	89901849	89927888	+	OSGIN2	protein_coding	882.551	1.15744	0.178065	6.50008	8.0278e-11	7.61778e-10
ENSG00000224843	6	26956932	27059749	+	LINC00240	lncRNA	109.05	-2.11586	0.325575	-6.49885	8.09366e-11	7.67635e-10
ENSG00000117691	1	212432920	212446379	+	NENF	protein_coding	317.06	1.9875	0.305834	6.49862	8.10608e-11	7.6842e-10
ENSG00000173409	1	230978981	231000733	+	ARV1	protein_coding	402.755	-1.475	0.227039	-6.49669	8.21037e-11	7.77908e-10
ENSG00000106025	7	120787320	120858402	-	TSPAN12	protein_coding	543.321	-1.37803	0.212149	-6.49558	8.27139e-11	7.83289e-10
ENSG00000188761	1	113876816	113887581	-	BCL2L15	protein_coding	138.009	-2.12625	0.327388	-6.49458	8.32653e-11	7.88109e-10
ENSG00000206573	3	9349689	9398579	-	THUMPD3-AS1	lncRNA	356.158	-1.38011	0.212578	-6.49225	8.45652e-11	8.00004e-10
ENSG00000136783	9	104747683	104760120	+	NIPSNAP3A	protein_coding	640.564	-1.5907	0.245036	-6.49169	8.48797e-11	8.0257e-10
ENSG00000138442	2	202874782	203014798	-	WDR12	protein_coding	600.786	-1.04788	0.161451	-6.49037	8.56236e-11	8.09019e-10
ENSG00000165487	13	21492691	21604181	-	MICU2	protein_coding	843.728	-0.863094	0.132982	-6.49033	8.56491e-11	8.09019e-10
ENSG00000062485	12	56271699	56300391	-	CS	protein_coding	1853.87	1.15178	0.1775	6.48891	8.64605e-11	8.16268e-10
ENSG00000132664	20	18467389	18484646	+	POLR3F	protein_coding	295.256	-1.79245	0.276297	-6.48741	8.73237e-11	8.23998e-10
ENSG00000110723	11	108505435	108593768	-	EXPH5	protein_coding	1567.51	-1.20732	0.186109	-6.48718	8.7456e-11	8.24827e-10
ENSG00000108984	17	69414697	69553865	+	MAP2K6	protein_coding	156.041	-3.27005	0.504141	-6.48638	8.79221e-11	8.28801e-10
ENSG00000125285	13	94709622	94712545	-	SOX21	protein_coding	210.286	-1.72837	0.266488	-6.48573	8.83019e-11	8.31958e-10
ENSG00000189067	16	11547722	11636381	-	LITAF	protein_coding	3282.65	1.85562	0.28626	6.48227	9.03541e-11	8.50861e-10
ENSG00000047249	8	53715543	53843558	-	ATP6V1H	protein_coding	1121.81	0.983004	0.15173	6.47864	9.25506e-11	8.71103e-10
ENSG00000139921	14	51240162	51257655	+	TMX1	protein_coding	1142.79	-1.35091	0.208594	-6.47625	9.40331e-11	8.84159e-10
ENSG00000207563	9	95085208	95085304	+	MIR23B	miRNA	14.0659	-6.853	1.05817	-6.47627	9.40183e-11	8.84159e-10
ENSG00000286545	2	112239621	112244375	+	AC092645.2	lncRNA	35.0271	-4.09394	0.632398	-6.47368	9.56447e-11	8.98856e-10
ENSG00000078674	8	17922840	18029944	+	PCM1	protein_coding	6423.36	-1.0731	0.165848	-6.47038	9.77566e-11	9.18239e-10
ENSG00000147041	X	38006553	38128819	+	SYTL5	protein_coding	1754.88	-1.52654	0.235937	-6.47013	9.79177e-11	9.19286e-10
ENSG00000125648	19	6436079	6465203	-	SLC25A23	protein_coding	487.412	2.37647	0.367312	6.46988	9.808e-11	9.20344e-10
ENSG00000235131	1	3712200	3714298	-	AL136528.2	lncRNA	15.7404	-7.10411	1.09929	-6.46244	1.0303e-10	9.66307e-10
ENSG00000112419	6	143536845	143831185	+	PHACTR2	protein_coding	485.453	-1.50459	0.232911	-6.45993	1.04751e-10	9.8195e-10
ENSG00000104691	8	30732247	30767006	+	UBXN8	protein_coding	168.988	-1.93936	0.300293	-6.45824	1.05929e-10	9.92487e-10
ENSG00000175105	3	88059255	88144664	+	ZNF654	protein_coding	336.708	-1.54048	0.238579	-6.4569	1.0687e-10	1.0008e-09
ENSG00000261210	16	19285731	19322145	+	CLEC19A	protein_coding	37.6613	-3.05907	0.473782	-6.4567	1.07013e-10	1.00163e-09
ENSG00000073711	3	135965728	136147894	+	PPP2R3A	protein_coding	337.597	-1.39551	0.216217	-6.4542	1.08794e-10	1.01779e-09
ENSG00000070814	5	150357629	150400308	+	TCOF1	protein_coding	169.647	1.46235	0.226589	6.45376	1.09105e-10	1.02018e-09
ENSG00000177082	15	84639281	84654343	-	WDR73	protein_coding	185.891	-1.89927	0.294353	-6.45234	1.10133e-10	1.02928e-09
ENSG00000095752	19	55364382	55370463	-	IL11	protein_coding	59.3111	3.32445	0.515573	6.44807	1.13284e-10	1.05819e-09
ENSG00000092529	15	42359498	42412949	+	CAPN3	protein_coding	106.657	-2.52594	0.391787	-6.44723	1.13914e-10	1.06354e-09
ENSG00000240207	3	158732263	158784070	+	AC080013.1	lncRNA	52.8362	-3.3086	0.513211	-6.44687	1.14187e-10	1.06555e-09
ENSG00000123933	4	2247432	2262109	-	MXD4	protein_coding	441.9	-1.54464	0.239611	-6.44648	1.14479e-10	1.06742e-09
ENSG00000235142	6	106705334	106788148	-	LINC02532	lncRNA	45.4043	-4.95753	0.769033	-6.44645	1.14502e-10	1.06742e-09
ENSG00000177030	11	644233	706715	-	DEAF1	protein_coding	239.325	1.65289	0.25641	6.44626	1.14642e-10	1.06819e-09
ENSG00000174695	5	83052846	83077863	-	TMEM167A	protein_coding	2252.72	-0.834496	0.129481	-6.44493	1.15651e-10	1.07705e-09
ENSG00000138336	10	68560337	68694487	+	TET1	protein_coding	33.7539	-4.16941	0.646948	-6.44474	1.15802e-10	1.07791e-09
ENSG00000166024	10	98134624	98244897	+	R3HCC1L	protein_coding	430.696	-1.32098	0.204989	-6.44415	1.16247e-10	1.08151e-09
ENSG00000186395	17	40818117	40822614	-	KRT10	protein_coding	260.568	2.31582	0.359474	6.44224	1.17727e-10	1.09473e-09
ENSG00000164953	8	93754844	93819234	+	TMEM67	protein_coding	1261.89	-1.1083	0.172083	-6.44049	1.19085e-10	1.10681e-09
ENSG00000137764	15	67542703	67807117	+	MAP2K5	protein_coding	154.062	1.49075	0.231486	6.43992	1.19539e-10	1.11046e-09
ENSG00000118997	2	195737703	196068837	-	DNAH7	protein_coding	3355.48	-1.3529	0.210126	-6.43851	1.20649e-10	1.12022e-09
ENSG00000147679	8	116766505	116849463	+	UTP23	protein_coding	159.01	-1.86796	0.290161	-6.43769	1.21304e-10	1.12573e-09
ENSG00000078061	X	47561100	47571920	+	ARAF	protein_coding	350.894	1.41816	0.220371	6.43531	1.23224e-10	1.14298e-09
[truncated: 16,543 more rows]
