# Supplementary material for: A viral assembly inhibitor blocks SARS-CoV-2 replication in airway epithelial cells
Source: Commun Biol. 2024 Apr 22;7:486. doi: 10.1038/s42003-024-06130-8 (PMC11035691; doi:10.1038/s42003-024-06130-8)
Supplement: Supplementary file 5 — Supplementary Data 3 [file 42003_2024_6130_MOESM5_ESM.xlsx]

## Sheet: Table S3
geneID	chrom	start	end	strand	symbol	biotype	baseMean	log2FoldChange	lfcSE	stat	pvalue	padj
ENSG00000144136	2	112645939	112663825	+	SLC20A1	protein_coding	4014.15	3.41321	0.128918	26.4758	1.83986e-154	3.41147e-150
ENSG00000140450	15	97960703	97973833	+	ARRDC4	protein_coding	2003.17	-3.59158	0.160889	-22.3233	2.19659e-110	2.03646e-106
ENSG00000105516	19	48630030	48637379	-	DBP	protein_coding	1180.2	4.01796	0.190948	21.0422	2.69708e-98	1.66697e-94
ENSG00000196850	12	110533245	110583318	-	PPTC7	protein_coding	1974.07	2.83792	0.142022	19.9822	7.86258e-89	3.6447e-85
ENSG00000089335	19	34677639	34686397	+	ZNF302	protein_coding	586.789	-4.84311	0.274032	-17.6735	6.70791e-70	2.48756e-66
ENSG00000120129	5	172768096	172771195	-	DUSP1	protein_coding	5258.69	4.56647	0.26302	17.3617	1.61027e-67	4.97627e-64
ENSG00000186767	X	63347228	63351332	-	SPIN4	protein_coding	707.999	4.21825	0.244174	17.2755	7.18962e-67	1.90443e-63
ENSG00000186480	7	155297776	155310235	+	INSIG1	protein_coding	5237.95	4.80525	0.280449	17.1341	8.25808e-66	1.91402e-62
ENSG00000047621	12	4487735	4538508	-	C12orf4	protein_coding	539.906	-3.24876	0.190025	-17.0965	1.57569e-65	3.24628e-62
ENSG00000180667	1	207043849	207052980	-	YOD1	protein_coding	3642.87	3.93036	0.232086	16.9349	2.48839e-64	4.61398e-61
ENSG00000185650	14	68787660	68796253	-	ZFP36L1	protein_coding	10797.8	4.00176	0.237494	16.8499	1.05048e-63	1.77073e-60
ENSG00000162086	16	3305406	3318852	+	ZNF75A	protein_coding	277.902	-4.0417	0.251461	-16.0729	3.95341e-58	6.10868e-55
ENSG00000125657	19	6531026	6535924	+	TNFSF9	protein_coding	702.086	5.84172	0.365224	15.9949	1.38683e-57	1.97805e-54
ENSG00000204389	6	31815543	31817946	+	HSPA1A	protein_coding	4387.03	4.8806	0.305256	15.9886	1.53547e-57	2.03362e-54
ENSG00000157514	X	107713221	107777342	-	TSC22D3	protein_coding	5012.85	4.05232	0.255164	15.8812	8.54905e-57	1.05678e-53
ENSG00000121858	3	172505508	172523475	-	TNFSF10	protein_coding	5547.59	-3.01678	0.192148	-15.7003	1.5058e-55	1.74503e-52
ENSG00000173812	17	41688885	41692668	+	EIF1	protein_coding	6860.85	2.46388	0.157436	15.6501	3.31894e-55	3.61999e-52
ENSG00000167552	12	49184795	49189080	-	TUBA1A	protein_coding	9738.22	-3.53645	0.226358	-15.6233	5.0559e-55	5.20814e-52
ENSG00000204388	6	31827738	31830254	+	HSPA1B	protein_coding	3773.1	5.04936	0.32758	15.4141	1.3153e-53	1.28359e-50
ENSG00000134107	3	4979437	4985323	+	BHLHE40	protein_coding	5899.57	3.41659	0.222891	15.3285	4.93224e-53	4.57268e-50
ENSG00000119986	10	97677424	97687241	-	AVPI1	protein_coding	1253.81	3.338	0.218231	15.2957	8.16493e-53	7.20925e-50
ENSG00000172932	11	67289300	67302485	+	ANKRD13D	protein_coding	888.035	1.81173	0.119841	15.1178	1.23661e-51	1.04223e-48
ENSG00000138166	10	110497907	110511533	+	DUSP5	protein_coding	3779.18	6.04216	0.401279	15.0572	3.09437e-51	2.4946e-48
ENSG00000143797	2	8852690	9003709	-	MBOAT2	protein_coding	4491.32	1.94142	0.129027	15.0466	3.63266e-51	2.80653e-48
ENSG00000125848	20	14322985	14337614	-	FLRT3	protein_coding	539.409	-4.94556	0.328925	-15.0355	4.29606e-51	3.1863e-48
ENSG00000141738	17	39737927	39747291	+	GRB7	protein_coding	914.931	3.64932	0.24276	15.0326	4.48706e-51	3.19996e-48
ENSG00000164284	5	149345430	149354583	+	GRPEL2	protein_coding	968.259	2.94892	0.19866	14.844	7.60398e-50	5.22196e-47
ENSG00000137193	6	37170152	37175428	+	PIM1	protein_coding	1737.57	5.34128	0.360759	14.8057	1.34671e-49	8.91808e-47
ENSG00000173627	1	183646275	183653316	-	APOBEC4	protein_coding	705.842	-3.82971	0.260894	-14.6792	8.76087e-49	5.60152e-46
ENSG00000164713	7	98252379	98310441	+	BRI3	protein_coding	1532.83	2.51839	0.171879	14.6521	1.30586e-48	8.0711e-46
ENSG00000204618	6	30070266	30075887	-	RNF39	protein_coding	1232.96	5.34261	0.368744	14.4887	1.42911e-47	8.54792e-45
ENSG00000166579	17	8413131	8490411	+	NDEL1	protein_coding	1393.07	2.01318	0.13912	14.4709	1.85148e-47	1.07282e-44
ENSG00000145675	5	68215756	68301821	+	PIK3R1	protein_coding	408.558	-2.84177	0.197142	-14.4148	4.17529e-47	2.34601e-44
ENSG00000180787	17	5078467	5096374	+	ZFP3	protein_coding	320.979	-3.61967	0.253524	-14.2774	3.02565e-46	1.65005e-43
ENSG00000070444	17	2384073	2401104	-	MNT	protein_coding	639.318	3.46476	0.244465	14.1728	1.34977e-45	7.15071e-43
ENSG00000174173	3	101561868	101566446	+	TRMT10C	protein_coding	643.462	-3.72529	0.264527	-14.0828	4.84389e-45	2.49487e-42
ENSG00000150991	12	124911604	124917368	-	UBC	protein_coding	54291	2.38044	0.170411	13.9688	2.41773e-44	1.21161e-41
ENSG00000119927	10	112149865	112215377	-	GPAM	protein_coding	325.267	-3.4119	0.244863	-13.9339	3.9414e-44	1.9232e-41
ENSG00000197841	19	34734155	34745378	+	ZNF181	protein_coding	252.493	-3.88576	0.280317	-13.862	1.0759e-43	5.11521e-41
ENSG00000143217	1	161070998	161089558	-	NECTIN4	protein_coding	1475.51	2.56063	0.186439	13.7344	6.31622e-43	2.92788e-40
ENSG00000069011	5	135027734	135034813	-	PITX1	protein_coding	3453.27	3.96985	0.29146	13.6206	3.02225e-42	1.36679e-39
ENSG00000128016	19	39406847	39409412	+	ZFP36	protein_coding	1771.22	3.56595	0.264651	13.4741	2.22038e-41	9.80243e-39
ENSG00000075407	10	38094334	38150293	+	ZNF37A	protein_coding	253.4	-3.84473	0.287081	-13.3925	6.68886e-41	2.8843e-38
ENSG00000072310	17	17810399	17837011	-	SREBF1	protein_coding	3768.24	2.87113	0.214824	13.3651	9.67631e-41	4.07768e-38
ENSG00000132002	19	14514769	14529770	-	DNAJB1	protein_coding	10427.5	3.72211	0.278879	13.3466	1.23898e-40	4.99418e-38
ENSG00000173110	1	161524540	161526894	+	HSPA6	protein_coding	617.788	5.69227	0.426478	13.3472	1.23021e-40	4.99418e-38
ENSG00000165030	9	91409045	91423832	-	NFIL3	protein_coding	361.895	2.9429	0.221003	13.3161	1.86558e-40	7.35991e-38
ENSG00000132109	11	4384897	4393702	-	TRIM21	protein_coding	454.4	-3.92022	0.294774	-13.2991	2.34287e-40	9.0503e-38
ENSG00000138640	4	88725955	89111398	-	FAM13A	protein_coding	964.373	-2.06737	0.155649	-13.2822	2.93471e-40	1.11052e-37
ENSG00000169155	9	126805006	126838210	+	ZBTB43	protein_coding	774.359	2.31721	0.175002	13.241	5.08563e-40	1.88596e-37
ENSG00000175595	16	13920154	13952348	+	ERCC4	protein_coding	295.884	-2.51879	0.190493	-13.2225	6.50778e-40	2.36602e-37
ENSG00000198730	11	10751246	10801625	+	CTR9	protein_coding	1771.08	-2.29172	0.173386	-13.2174	6.96058e-40	2.48198e-37
ENSG00000274349	9	66856426	66932141	+	ZNF658	protein_coding	159.277	-4.69898	0.357692	-13.137	2.02202e-39	7.07403e-37
ENSG00000174125	4	38790677	38856817	-	TLR1	protein_coding	398.229	-3.66097	0.279163	-13.1141	2.73418e-39	9.38838e-37
ENSG00000197782	19	40069152	40090938	-	ZNF780A	protein_coding	350.332	-3.51956	0.269883	-13.041	7.1468e-39	2.40938e-36
ENSG00000161011	5	179806398	179838078	+	SQSTM1	protein_coding	9194.7	2.02552	0.155535	13.0229	9.07033e-39	3.00325e-36
ENSG00000198763	MT	4470	5511	+	MT-ND2	protein_coding	73142	-2.16197	0.166812	-12.9605	2.04896e-38	6.66522e-36
ENSG00000163026	2	24029347	24049575	-	WDCP	protein_coding	204.988	-3.3523	0.258719	-12.9573	2.1368e-38	6.83112e-36
ENSG00000007062	4	15963076	16084378	-	PROM1	protein_coding	5572.73	-2.51249	0.194228	-12.9358	2.82596e-38	8.88119e-36
ENSG00000162543	1	20186096	20196050	+	UBXN10	protein_coding	3808.89	-2.09647	0.162368	-12.9119	3.8579e-38	1.19222e-35
ENSG00000114315	3	194136148	194138732	+	HES1	protein_coding	1667.6	2.58292	0.200262	12.8977	4.63695e-38	1.40948e-35
ENSG00000129757	11	2883213	2885773	-	CDKN1C	protein_coding	520.726	4.75552	0.369656	12.8647	7.10979e-38	2.12629e-35
ENSG00000249082	5	135038831	135040047	-	C5orf66-AS1	lncRNA	118.555	3.77521	0.294215	12.8315	1.09258e-37	3.21567e-35
ENSG00000101782	18	23453287	23486603	+	RIOK3	protein_coding	3353.55	1.83031	0.14312	12.7886	1.8978e-37	5.49829e-35
ENSG00000081320	2	196133583	196176503	-	STK17B	protein_coding	1246.34	1.85151	0.14492	12.7761	2.23097e-37	6.36409e-35
ENSG00000269343	19	57819721	57846238	+	ZNF587B	protein_coding	218.981	-2.87393	0.225264	-12.758	2.81164e-37	7.899e-35
ENSG00000128000	19	40028260	40056231	-	ZNF780B	protein_coding	381.147	-3.76502	0.295308	-12.7494	3.13983e-37	8.68936e-35
ENSG00000243701	3	107220744	107348464	+	DUBR	lncRNA	289.125	-2.85766	0.225655	-12.6638	9.38058e-37	2.55786e-34
ENSG00000178700	3	94047836	94063389	-	DHFR2	protein_coding	186.43	-2.96641	0.234787	-12.6345	1.36315e-36	3.66313e-34
ENSG00000136870	9	101398873	101410660	+	ZNF189	protein_coding	414.905	-3.28676	0.260416	-12.6212	1.61398e-36	4.2752e-34
ENSG00000124193	20	43457893	43466046	+	SRSF6	protein_coding	1527.62	-1.91975	0.152353	-12.6007	2.09357e-36	5.46746e-34
ENSG00000134982	5	112707498	112846239	+	APC	protein_coding	1034.36	-2.08161	0.165827	-12.5529	3.83401e-36	9.87364e-34
ENSG00000136925	9	97600080	97633368	-	TSTD2	protein_coding	237.843	-2.65769	0.212333	-12.5166	6.05741e-36	1.53858e-33
ENSG00000136802	9	128882112	128918039	+	LRRC8A	protein_coding	5049.64	4.30773	0.344826	12.4925	8.20429e-36	2.05573e-33
ENSG00000087086	19	48965309	48966879	+	FTL	protein_coding	32960.6	2.07363	0.166655	12.4427	1.5331e-35	3.79023e-33
ENSG00000178295	2	17753858	17788946	+	GEN1	protein_coding	360.494	-3.88007	0.312628	-12.4111	2.27422e-35	5.54849e-33
ENSG00000141458	18	23506184	23586506	-	NPC1	protein_coding	1447.7	3.00035	0.241915	12.4025	2.53357e-35	6.10097e-33
ENSG00000108840	17	44076746	44123702	-	HDAC5	protein_coding	833.184	2.11826	0.171141	12.3772	3.47076e-35	8.25061e-33
ENSG00000131069	20	34872146	34927962	+	ACSS2	protein_coding	2608.13	2.96549	0.239848	12.3641	4.08981e-35	9.59914e-33
ENSG00000176387	16	67430652	67437553	+	HSD11B2	protein_coding	244.241	4.11968	0.334813	12.3044	8.57708e-35	1.98795e-32
ENSG00000025039	6	89364616	89412273	-	RRAGD	protein_coding	1143.89	2.30814	0.188002	12.2772	1.20105e-34	2.74936e-32
ENSG00000188483	9	129175552	129178261	-	IER5L	protein_coding	903.643	3.43118	0.279644	12.2699	1.31493e-34	2.97334e-32
ENSG00000079385	19	42507304	42561234	-	CEACAM1	protein_coding	2850.77	3.24439	0.264587	12.2621	1.44648e-34	3.23141e-32
ENSG00000186594	17	1711493	1717174	-	MIR22HG	lncRNA	338.566	-2.85821	0.233162	-12.2585	1.51297e-34	3.33971e-32
ENSG00000204160	1	26826688	26857604	+	ZDHHC18	protein_coding	464.662	2.60706	0.212723	12.2556	1.56727e-34	3.41887e-32
ENSG00000170412	17	74424851	74451653	+	GPRC5C	protein_coding	1347.55	1.8817	0.153674	12.2448	1.79212e-34	3.8639e-32
ENSG00000089902	14	102592649	102730561	+	RCOR1	protein_coding	1063.37	2.31881	0.19044	12.1761	4.16899e-34	8.88522e-32
ENSG00000114491	3	124730433	124749273	+	UMPS	protein_coding	530.835	-2.9561	0.243144	-12.1579	5.21121e-34	1.09803e-31
ENSG00000198718	14	44962190	45074431	+	TOGARAM1	protein_coding	891.845	-1.92907	0.158718	-12.154	5.45993e-34	1.13751e-31
ENSG00000090612	12	133181409	133214831	+	ZNF268	protein_coding	517.424	-3.61855	0.298361	-12.1281	7.49728e-34	1.54461e-31
ENSG00000178163	4	10439880	10457426	-	ZNF518B	protein_coding	496.508	-2.39896	0.19783	-12.1264	7.65518e-34	1.55981e-31
ENSG00000155090	8	102648784	102655725	-	KLF10	protein_coding	2095.5	-2.60904	0.215501	-12.1069	9.71395e-34	1.95778e-31
ENSG00000011422	19	43646095	43670547	-	PLAUR	protein_coding	1388.53	3.95928	0.327189	12.1009	1.04467e-33	2.08283e-31
ENSG00000198648	2	167954020	168247595	-	STK39	protein_coding	1721.43	2.47771	0.204817	12.0972	1.09297e-33	2.15593e-31
ENSG00000103089	16	74712955	74774831	-	FA2H	protein_coding	417.609	4.04304	0.334311	12.0936	1.14118e-33	2.2236e-31
ENSG00000125746	19	45606994	45645629	-	EML2	protein_coding	941.912	1.9071	0.157704	12.0929	1.15125e-33	2.2236e-31
ENSG00000164086	3	52048919	52056571	-	DUSP7	protein_coding	1192.91	3.72544	0.308792	12.0646	1.62533e-33	3.1069e-31
ENSG00000129317	12	43718993	43758817	-	PUS7L	protein_coding	454.133	-2.42143	0.201356	-12.0256	2.60547e-33	4.92966e-31
ENSG00000258791	14	55781132	55796731	-	LINC00520	lncRNA	92.8466	6.28	0.52302	12.0072	3.25768e-33	6.1014e-31
ENSG00000124160	20	46060991	46089962	-	NCOA5	protein_coding	175.518	-5.31477	0.442677	-12.006	3.3054e-33	6.12887e-31
ENSG00000120784	19	37613749	37692337	-	ZFP30	protein_coding	268.556	-2.79034	0.232622	-11.9952	3.76697e-33	6.91556e-31
ENSG00000188227	19	37506939	37548762	+	ZNF793	protein_coding	213.066	-2.49487	0.208171	-11.9847	4.27414e-33	7.76971e-31
ENSG00000132259	11	6234765	6244479	+	CNGA4	protein_coding	341.43	-2.99786	0.250667	-11.9595	5.79028e-33	1.04236e-30
ENSG00000123836	1	207034366	207081024	+	PFKFB2	protein_coding	876.484	1.7212	0.144548	11.9074	1.08245e-32	1.92988e-30
ENSG00000134258	1	117143587	117210960	-	VTCN1	protein_coding	3966.24	-2.80005	0.235713	-11.8791	1.52058e-32	2.68521e-30
ENSG00000155850	5	149960758	149993455	+	SLC26A2	protein_coding	360.025	-2.84951	0.240767	-11.8351	2.56909e-32	4.49396e-30
ENSG00000172123	17	35411060	35433283	-	SLFN12	protein_coding	318.085	-4.00883	0.338969	-11.8265	2.84681e-32	4.93322e-30
ENSG00000141040	17	16546954	16569204	-	ZNF287	protein_coding	141.831	-3.41256	0.28962	-11.7829	4.78245e-32	8.21075e-30
ENSG00000115339	2	165747588	165794659	-	GALNT3	protein_coding	4073.76	1.43952	0.122493	11.7518	6.91298e-32	1.17597e-29
ENSG00000062370	19	44326555	44367217	-	ZNF112	protein_coding	173.144	-3.06443	0.261197	-11.7322	8.71331e-32	1.46875e-29
ENSG00000113070	5	140332843	140346603	-	HBEGF	protein_coding	946.434	3.86834	0.33053	11.7035	1.22372e-31	2.04416e-29
ENSG00000198888	MT	3307	4262	+	MT-ND1	protein_coding	22110.8	-2.95689	0.252738	-11.6994	1.28316e-31	2.12431e-29
ENSG00000101670	18	49560699	49599185	+	LIPG	protein_coding	215.505	4.11148	0.351805	11.6868	1.48901e-31	2.44329e-29
ENSG00000116350	1	29147743	29181900	-	SRSF4	protein_coding	1670.96	1.32299	0.113302	11.6766	1.6778e-31	2.72869e-29
ENSG00000168906	2	85539168	85545281	+	MAT2A	protein_coding	2448.19	-2.61308	0.223801	-11.6759	1.69237e-31	2.72869e-29
ENSG00000137648	11	118077012	118121890	+	TMPRSS4	protein_coding	15316.2	1.83052	0.157636	11.6123	3.56766e-31	5.70272e-29
ENSG00000189143	7	73799542	73832693	+	CLDN4	protein_coding	7822.47	3.31707	0.285926	11.6012	4.06501e-31	6.44217e-29
ENSG00000163931	3	53224712	53256052	-	TKT	protein_coding	5214.38	2.49101	0.215653	11.551	7.29651e-31	1.14654e-28
ENSG00000135750	1	233614106	233672514	+	KCNK1	protein_coding	1115.23	2.17895	0.188857	11.5375	8.53214e-31	1.32944e-28
ENSG00000237807	8	53493523	53524336	-	AC022034.1	lncRNA	350.272	-3.47309	0.301286	-11.5276	9.58316e-31	1.48076e-28
ENSG00000272888	15	92819540	92899701	+	LINC01578	lncRNA	770.059	1.97996	0.172002	11.5113	1.15756e-30	1.77384e-28
ENSG00000080561	X	107825755	107927193	+	MID2	protein_coding	444.974	2.59138	0.225345	11.4996	1.32475e-30	2.0134e-28
ENSG00000085276	3	169083499	169663775	-	MECOM	protein_coding	2283.63	-2.44205	0.21249	-11.4925	1.43884e-30	2.16902e-28
ENSG00000117507	1	171137740	171161568	+	FMO6P	transcribed_unitary_pseudogene	246.6	-4.73802	0.412526	-11.4854	1.56235e-30	2.33621e-28
ENSG00000066027	1	212285410	212361853	+	PPP2R5A	protein_coding	1134.95	1.73594	0.152273	11.4002	4.17338e-30	6.19063e-28
ENSG00000206199	3	149761100	149968385	-	ANKUB1	protein_coding	1283.88	-2.52972	0.221959	-11.3972	4.31549e-30	6.35062e-28
ENSG00000118965	2	19910260	19990131	-	WDR35	protein_coding	1199.81	-2.25824	0.198196	-11.394	4.48018e-30	6.54107e-28
ENSG00000169490	8	38988808	38996824	-	TM2D2	protein_coding	704.514	-2.22008	0.195152	-11.3762	5.4948e-30	7.95973e-28
ENSG00000104549	8	124998497	125022283	+	SQLE	protein_coding	2929.79	2.85868	0.251904	11.3483	7.56213e-30	1.08695e-27
ENSG00000180758	1	9100305	9129102	-	GPR157	protein_coding	576.807	3.16975	0.279659	11.3344	8.86868e-30	1.26495e-27
ENSG00000100664	14	103333544	103345025	+	EIF5	protein_coding	2842.64	-1.77007	0.156794	-11.2892	1.48446e-29	2.10114e-27
ENSG00000186496	18	35366694	35377337	-	ZNF396	protein_coding	220.688	-2.94005	0.261372	-11.2485	2.35475e-29	3.30771e-27
ENSG00000099219	9	5765076	5833117	-	ERMP1	protein_coding	3980.94	1.55114	0.138277	11.2176	3.34198e-29	4.65918e-27
ENSG00000106211	7	76302673	76304295	+	HSPB1	protein_coding	18497.7	2.66847	0.238206	11.2024	3.96985e-29	5.4932e-27
ENSG00000189060	22	37805093	37807436	+	H1-0	protein_coding	1991.23	2.70812	0.241785	11.2005	4.05266e-29	5.56625e-27
ENSG00000231074	6	30286690	30327382	-	HCG18	lncRNA	405.755	-2.9607	0.264505	-11.1933	4.39521e-29	5.99235e-27
ENSG00000119636	14	74019349	74082863	+	BBOF1	protein_coding	1780.17	-2.10726	0.188352	-11.1879	4.67222e-29	6.32352e-27
ENSG00000186329	3	171843349	171938715	+	TMEM212	protein_coding	549.169	-2.63858	0.235929	-11.1838	4.89534e-29	6.57749e-27
ENSG00000286242	4	102814252	102819881	+	AC018797.3	lncRNA	124.884	3.23622	0.289686	11.1715	5.62355e-29	7.50157e-27
ENSG00000125733	19	6737925	6751530	+	TRIP10	protein_coding	2473.4	2.81142	0.251997	11.1566	6.65078e-29	8.80848e-27
ENSG00000188171	19	20619939	20661596	-	ZNF626	protein_coding	192.461	-3.44462	0.308863	-11.1526	6.95794e-29	9.14994e-27
ENSG00000169018	15	68277745	68295862	+	FEM1B	protein_coding	1700.52	1.34914	0.121008	11.1492	7.22816e-29	9.43835e-27
ENSG00000185875	10	25016612	25026664	+	THNSL1	protein_coding	298.074	-2.81934	0.253154	-11.1368	8.30221e-29	1.0765e-26
ENSG00000155636	2	178112424	178139011	+	RBM45	protein_coding	290.901	-2.53446	0.227729	-11.1293	9.03919e-29	1.16392e-26
ENSG00000242474	7	135853	149527	-	AC093627.5	lncRNA	92.3447	-4.97841	0.447716	-11.1196	1.00766e-28	1.28855e-26
ENSG00000112759	6	44219553	44234142	+	SLC29A1	protein_coding	277.478	3.37118	0.3033	11.115	1.06027e-28	1.34655e-26
ENSG00000116560	1	35176378	35193145	-	SFPQ	protein_coding	2364.22	-1.371	0.123354	-11.1143	1.06842e-28	1.34766e-26
ENSG00000261324	12	14762504	14767931	-	AC010168.2	lncRNA	122.219	-5.82746	0.524909	-11.1018	1.22884e-28	1.53954e-26
ENSG00000093167	3	37052626	37183689	-	LRRFIP2	protein_coding	1523.39	1.69922	0.153189	11.0924	1.36644e-28	1.70043e-26
ENSG00000183323	5	69280175	69332809	-	CCDC125	protein_coding	1520.87	-1.64178	0.148095	-11.086	1.46658e-28	1.81288e-26
ENSG00000151023	10	24981979	25062279	-	ENKUR	protein_coding	2935.04	-1.84146	0.16658	-11.0545	2.08526e-28	2.56058e-26
ENSG00000176454	15	34358633	34367196	-	LPCAT4	protein_coding	1488.82	2.38692	0.21608	11.0464	2.28094e-28	2.78245e-26
ENSG00000104687	8	30678066	30727846	-	GSR	protein_coding	2230.12	2.41539	0.218803	11.0391	2.47528e-28	2.99978e-26
ENSG00000000457	1	169849631	169894267	-	SCYL3	protein_coding	482.573	-2.21437	0.200683	-11.0341	2.6154e-28	3.14901e-26
ENSG00000135845	1	172370189	172444086	-	PIGC	protein_coding	376.906	-2.05536	0.186622	-11.0135	3.28934e-28	3.9349e-26
ENSG00000256771	19	19865882	19894674	+	ZNF253	protein_coding	176.848	-3.0598	0.278332	-10.9934	4.11366e-28	4.88945e-26
ENSG00000250033	4	138057464	138178177	+	SLC7A11-AS1	lncRNA	86.79	5.90216	0.537222	10.9864	4.44066e-28	5.2445e-26
ENSG00000165637	10	75210154	75231448	+	VDAC2	protein_coding	4205.99	1.55528	0.141658	10.9791	4.81646e-28	5.65233e-26
ENSG00000217527	6	53336943	53337346	-	RPS16P5	transcribed_processed_pseudogene	51.2428	5.28904	0.481838	10.9768	4.94192e-28	5.76309e-26
ENSG00000229337	2	177111036	177212662	-	AC079305.4	lncRNA	94.7258	4.3106	0.393168	10.9638	5.70619e-28	6.61276e-26
ENSG00000103494	16	53598153	53703938	-	RPGRIP1L	protein_coding	1525.53	-1.7816	0.162613	-10.9561	6.21377e-28	7.15626e-26
ENSG00000126368	17	40092793	40100589	-	NR1D1	protein_coding	1055.01	3.88521	0.35472	10.9529	6.43544e-28	7.3658e-26
ENSG00000127989	7	91692008	91880702	-	MTERF1	protein_coding	291.985	-2.8148	0.257472	-10.9325	8.06406e-28	9.17323e-26
ENSG00000092871	17	35005990	35089319	-	RFFL	protein_coding	264.534	2.33061	0.213415	10.9206	9.19335e-28	1.03941e-25
ENSG00000072864	16	15643267	15726353	+	NDE1	protein_coding	306.493	2.13397	0.195809	10.8982	1.17542e-27	1.32088e-25
ENSG00000112511	6	33410399	33416453	+	PHF1	protein_coding	598.834	2.68513	0.246797	10.8799	1.43664e-27	1.60471e-25
ENSG00000136935	9	124878275	124948492	-	GOLGA1	protein_coding	555.412	-1.43778	0.132419	-10.8578	1.8312e-27	2.03318e-25
ENSG00000135334	6	87674860	87702233	-	AKIRIN2	protein_coding	660.332	3.25714	0.300086	10.854	1.90859e-27	2.10649e-25
ENSG00000124882	4	74365145	74388749	+	EREG	protein_coding	769.586	4.12913	0.380639	10.8479	2.0413e-27	2.23963e-25
ENSG00000160570	19	42198598	42220140	-	DEDD2	protein_coding	770.227	2.59941	0.240229	10.8205	2.75155e-27	3.00113e-25
ENSG00000183696	7	48088628	48108736	+	UPP1	protein_coding	1483.04	3.85182	0.356166	10.8147	2.93255e-27	3.17984e-25
ENSG00000070495	17	76712832	76726799	-	JMJD6	protein_coding	371.183	2.1472	0.19903	10.7883	3.90774e-27	4.21263e-25
ENSG00000130935	17	67717931	67744531	+	NOL11	protein_coding	974.371	-2.5362	0.235109	-10.7873	3.95074e-27	4.23437e-25
ENSG00000155657	2	178525989	178830802	-	TTN	protein_coding	354.713	-3.47269	0.3224	-10.7713	4.70094e-27	5.00947e-25
ENSG00000171295	19	11814273	11835216	+	ZNF440	protein_coding	1772.33	-1.69497	0.157703	-10.7479	6.06414e-27	6.42522e-25
ENSG00000100815	14	91965991	92040896	-	TRIP11	protein_coding	1829.46	-1.64952	0.153713	-10.7312	7.2639e-27	7.65269e-25
ENSG00000170275	3	33114014	33147773	+	CRTAP	protein_coding	993.275	2.3997	0.223722	10.7263	7.66425e-27	8.02884e-25
ENSG00000138434	2	181891730	181930738	+	ITPRID2	protein_coding	3200.36	1.31679	0.122801	10.7229	7.94376e-27	8.27489e-25
ENSG00000188895	17	40121971	40136917	+	MSL1	protein_coding	1596.94	1.68582	0.157686	10.691	1.12168e-26	1.16191e-24
ENSG00000125630	2	112541915	112579818	+	POLR1B	protein_coding	564.774	-2.16069	0.202491	-10.6706	1.3976e-26	1.43969e-24
ENSG00000176593	19	58002061	58011232	+	AC008969.1	lncRNA	163.842	-3.55414	0.333242	-10.6653	1.47866e-26	1.51477e-24
ENSG00000133606	7	140453033	140479536	-	MKRN1	protein_coding	2632.82	1.29698	0.122095	10.6227	2.33612e-26	2.38002e-24
ENSG00000153310	8	129839593	130017129	-	FAM49B	protein_coding	1104.5	1.50708	0.141916	10.6195	2.41814e-26	2.45012e-24
ENSG00000177409	7	93130056	93148385	-	SAMD9L	protein_coding	1960.99	-3.8677	0.364548	-10.6096	2.68956e-26	2.71031e-24
ENSG00000167384	19	44474428	44500524	-	ZNF180	protein_coding	150.397	-3.48915	0.330582	-10.5546	4.83816e-26	4.84914e-24
ENSG00000245680	19	37181579	37218153	-	ZNF585B	protein_coding	266.224	-1.96824	0.186562	-10.55	5.07712e-26	5.06129e-24
ENSG00000013503	12	106357748	106510198	+	POLR3B	protein_coding	297.944	-2.36534	0.2245	-10.536	5.89575e-26	5.84594e-24
ENSG00000273760	10	47970043	47973496	-	AC245041.1	lncRNA	148.403	-4.6981	0.445963	-10.5347	5.97601e-26	5.894e-24
ENSG00000225630	1	629640	630683	+	MTND2P28	unprocessed_pseudogene	126.579	-2.63075	0.249985	-10.5237	6.72121e-26	6.5939e-24
ENSG00000125863	20	10401009	10434222	-	MKKS	protein_coding	311.974	-2.45022	0.233398	-10.498	8.81934e-26	8.60674e-24
ENSG00000196458	12	132918306	132956306	-	ZNF605	protein_coding	557.398	-3.05712	0.291236	-10.4971	8.91037e-26	8.65005e-24
ENSG00000186577	6	34246381	34249108	-	SMIM29	protein_coding	314.356	2.18076	0.20838	10.4653	1.24649e-25	1.20377e-23
ENSG00000130703	20	62231922	62296213	+	OSBPL2	protein_coding	1311.53	1.7376	0.166066	10.4633	1.27358e-25	1.22356e-23
ENSG00000172819	12	53210567	53232980	-	RARG	protein_coding	959.855	2.0434	0.195736	10.4396	1.63553e-25	1.56319e-23
ENSG00000224479	3	63741827	63827445	-	AC104162.1	transcribed_unitary_pseudogene	126.954	-3.52037	0.33739	-10.4341	1.7319e-25	1.64681e-23
ENSG00000122484	1	92299059	92402056	+	RPAP2	protein_coding	445.694	-2.22085	0.213234	-10.4151	2.1162e-25	2.00197e-23
ENSG00000165494	11	83156988	83187451	+	PCF11	protein_coding	624.776	-1.57622	0.151373	-10.4128	2.16696e-25	2.03959e-23
ENSG00000118816	4	77047155	77075989	-	CCNI	protein_coding	3879.4	2.26773	0.218263	10.3899	2.75648e-25	2.58135e-23
ENSG00000099260	1	99646113	99694541	+	PALMD	protein_coding	980.895	-2.00092	0.192847	-10.3757	3.19877e-25	2.98048e-23
ENSG00000052344	16	31131433	31135727	-	PRSS8	protein_coding	2608	2.69319	0.260155	10.3523	4.08686e-25	3.78892e-23
ENSG00000005001	16	2852730	2858170	-	PRSS22	protein_coding	5310.01	2.89086	0.27968	10.3363	4.82673e-25	4.45259e-23
ENSG00000116717	1	67685201	67688334	+	GADD45A	protein_coding	2281.91	3.18941	0.308797	10.3285	5.23747e-25	4.80758e-23
ENSG00000162757	1	209779208	209784559	-	C1orf74	protein_coding	102.682	-5.97661	0.578872	-10.3246	5.45603e-25	4.98353e-23
ENSG00000117461	1	46040140	46133036	-	PIK3R3	protein_coding	778.58	-2.04786	0.198628	-10.31	6.35017e-25	5.7718e-23
ENSG00000177191	19	41425359	41428730	-	B3GNT8	protein_coding	196.32	4.25434	0.413418	10.2906	7.76624e-25	7.02447e-23
ENSG00000117697	1	212726153	212791782	-	NSL1	protein_coding	395.816	-2.24858	0.218903	-10.272	9.4206e-25	8.47946e-23
ENSG00000114204	3	167441789	167479004	-	SERPINI2	protein_coding	280.263	-3.53212	0.344526	-10.2521	1.15761e-24	1.03693e-22
ENSG00000160712	1	154405193	154469450	+	IL6R	protein_coding	510.286	2.43377	0.237582	10.2439	1.26002e-24	1.12324e-22
ENSG00000157227	14	22836560	22849027	+	MMP14	protein_coding	6586.59	2.47311	0.241458	10.2424	1.28e-24	1.13558e-22
ENSG00000123358	12	52022832	52059507	+	NR4A1	protein_coding	197.289	4.25742	0.415738	10.2407	1.30356e-24	1.15098e-22
ENSG00000162231	11	62792123	62806302	-	NXF1	protein_coding	928.601	-2.15342	0.210397	-10.2351	1.38113e-24	1.21369e-22
ENSG00000132467	4	70688532	70690551	+	UTP3	protein_coding	360.199	-2.04625	0.200272	-10.2174	1.65791e-24	1.45004e-22
ENSG00000127947	7	77537295	77640069	+	PTPN12	protein_coding	1659.65	2.20919	0.216394	10.2091	1.8056e-24	1.57181e-22
ENSG00000052802	4	165327667	165343164	+	MSMO1	protein_coding	7657.24	3.07474	0.301262	10.2062	1.85997e-24	1.61157e-22
ENSG00000164252	5	77029251	77065234	+	AGGF1	protein_coding	232.782	-2.25736	0.22129	-10.2009	1.96452e-24	1.69424e-22
ENSG00000204569	6	30600413	30618612	-	PPP1R10	protein_coding	368.526	-3.37652	0.33106	-10.1991	2.00052e-24	1.7173e-22
ENSG00000196981	3	122411846	122416062	-	WDR5B	protein_coding	468.091	-2.6086	0.255875	-10.1948	2.09128e-24	1.78694e-22
ENSG00000196693	10	42574185	42638570	-	ZNF33B	protein_coding	620.294	-2.10724	0.206779	-10.1908	2.17953e-24	1.8538e-22
ENSG00000107201	9	32455302	32526208	-	DDX58	protein_coding	1711.63	-4.2254	0.414781	-10.1871	2.26512e-24	1.9178e-22
ENSG00000176407	2	84971093	85059472	+	KCMF1	protein_coding	1883.27	1.42875	0.140342	10.1805	2.42383e-24	2.04285e-22
ENSG00000132436	7	50444128	50542535	-	FIGNL1	protein_coding	185.415	-4.38772	0.431915	-10.1587	3.02941e-24	2.54169e-22
ENSG00000158406	6	26277609	26285638	-	H4C8	protein_coding	196.971	-4.59561	0.452683	-10.1519	3.24877e-24	2.71346e-22
ENSG00000150776	11	112074086	112085150	+	NKAPD1	protein_coding	596.381	-2.06475	0.203832	-10.1297	4.07967e-24	3.39217e-22
ENSG00000166471	11	9280654	9314636	-	TMEM41B	protein_coding	970.528	1.60359	0.158335	10.1279	4.15585e-24	3.44008e-22
ENSG00000163946	3	56620133	56683237	-	TASOR	protein_coding	1347.3	-1.67842	0.165816	-10.1221	4.40648e-24	3.63133e-22
ENSG00000107242	9	68705240	69009176	+	PIP5K1B	protein_coding	313.405	2.16591	0.214287	10.1075	5.11741e-24	4.19854e-22
ENSG00000180626	17	5179535	5191868	-	ZNF594	protein_coding	107.735	-9.73456	0.963627	-10.102	5.4127e-24	4.42125e-22
ENSG00000087074	19	48872421	48876058	+	PPP1R15A	protein_coding	2721.45	2.82751	0.280076	10.0955	5.7827e-24	4.70276e-22
ENSG00000132434	7	55365448	55433742	+	LANCL2	protein_coding	284.361	-2.06838	0.204939	-10.0927	5.95329e-24	4.82034e-22
ENSG00000224616	1	100251528	100266179	-	RTCA-AS1	lncRNA	258.249	-2.87357	0.284975	-10.0836	6.53058e-24	5.26478e-22
ENSG00000268205	19	57304305	57308562	+	AC005261.2	lncRNA	512.633	2.12869	0.211198	10.0791	6.83491e-24	5.48627e-22
ENSG00000130522	19	18279694	18281622	-	JUND	protein_coding	1435.72	2.83626	0.281635	10.0707	7.44579e-24	5.95085e-22
ENSG00000064012	2	201233443	201287711	+	CASP8	protein_coding	449.984	-1.68029	0.167004	-10.0614	8.18416e-24	6.51008e-22
ENSG00000198938	MT	9207	9990	+	MT-CO3	protein_coding	160156	-1.98808	0.197602	-10.061	8.21572e-24	6.51008e-22
ENSG00000274750	6	26224199	26227473	+	H3C6	protein_coding	77.5695	-4.12299	0.409855	-10.0596	8.33007e-24	6.5726e-22
ENSG00000164815	7	104126341	104208047	-	ORC5	protein_coding	389.297	-2.10424	0.209205	-10.0583	8.44835e-24	6.63768e-22
ENSG00000104055	15	43232590	43266928	-	TGM5	protein_coding	992.869	2.6008	0.258605	10.057	8.5538e-24	6.69218e-22
ENSG00000049130	12	88492793	88580851	-	KITLG	protein_coding	1634	-2.89954	0.288546	-10.0488	9.30052e-24	7.24581e-22
ENSG00000170873	8	124550790	124728429	-	MTSS1	protein_coding	621.042	1.86326	0.185529	10.043	9.86513e-24	7.65353e-22
ENSG00000119953	10	110290730	110304938	-	SMNDC1	protein_coding	560.012	1.73031	0.172416	10.0357	1.06181e-23	8.20335e-22
ENSG00000278318	19	44417519	44448578	-	ZNF229	protein_coding	231.263	-3.08734	0.307683	-10.0342	1.07858e-23	8.29835e-22
ENSG00000186141	1	145824088	145844402	+	POLR3C	protein_coding	353.262	-1.59922	0.159587	-10.021	1.23284e-23	9.44602e-22
ENSG00000124145	20	45325288	45348424	-	SDC4	protein_coding	9850.68	1.53948	0.153645	10.0197	1.24825e-23	9.52468e-22
ENSG00000166886	12	57089043	57095476	+	NAB2	protein_coding	464.711	2.26008	0.225589	10.0186	1.26313e-23	9.59876e-22
ENSG00000109511	4	168092537	168187736	+	ANXA10	protein_coding	861.334	2.92285	0.29188	10.0139	1.32435e-23	1.00229e-21
ENSG00000112406	6	139135080	139180802	+	HECA	protein_coding	464.13	2.18044	0.217816	10.0105	1.37072e-23	1.03317e-21
ENSG00000131263	X	74582976	74614624	-	RLIM	protein_coding	1909.17	1.18903	0.119009	9.99111	1.66711e-23	1.25148e-21
ENSG00000101138	20	56392371	56406362	+	CSTF1	protein_coding	608.997	-1.97769	0.197963	-9.9902	1.68249e-23	1.25793e-21
ENSG00000196922	8	144973589	145002895	-	ZNF252P	transcribed_unprocessed_pseudogene	394.813	-2.05256	0.205975	-9.96507	2.16719e-23	1.61381e-21
ENSG00000120051	10	104353833	104455102	+	CFAP58	protein_coding	566.576	-1.97029	0.197771	-9.96247	2.22473e-23	1.65004e-21
ENSG00000164411	6	87282980	87329278	-	GJB7	protein_coding	85.0258	-4.75843	0.478254	-9.94959	2.5322e-23	1.8706e-21
ENSG00000105497	19	51571283	51592510	+	ZNF175	protein_coding	181.262	-2.75249	0.276978	-9.93757	2.85714e-23	2.10227e-21
ENSG00000152763	1	66812885	66924856	-	WDR78	protein_coding	2719.58	-1.636	0.164821	-9.92592	3.2113e-23	2.35352e-21
ENSG00000051108	16	56932142	56944864	+	HERPUD1	protein_coding	2168.81	1.69369	0.170646	9.92515	3.23609e-23	2.36235e-21
ENSG00000069399	19	44747705	44760044	+	BCL3	protein_coding	617.027	2.03446	0.205023	9.92308	3.30411e-23	2.40254e-21
ENSG00000168806	15	43323649	43330582	-	LCMT2	protein_coding	142.384	-3.35427	0.338043	-9.92262	3.31914e-23	2.40404e-21
ENSG00000134278	18	12446512	12658134	-	SPIRE1	protein_coding	874.639	1.65031	0.166559	9.90823	3.8337e-23	2.76593e-21
ENSG00000188659	15	82262810	82284930	+	SAXO2	protein_coding	2470.54	-2.0364	0.205653	-9.90215	4.07436e-23	2.92817e-21
ENSG00000114796	3	183635610	183684519	+	KLHL24	protein_coding	1350.92	1.35415	0.136765	9.90131	4.10861e-23	2.94138e-21
ENSG00000166949	15	67063763	67195169	+	SMAD3	protein_coding	2934.34	1.8122	0.183249	9.88928	4.63371e-23	3.30455e-21
ENSG00000197343	7	99558406	99576453	+	ZNF655	protein_coding	981.563	-2.54709	0.257648	-9.88594	4.79082e-23	3.4035e-21
ENSG00000110442	11	36269284	36289449	-	COMMD9	protein_coding	513.96	-2.08198	0.210717	-9.88045	5.06039e-23	3.58129e-21
ENSG00000136379	15	80679684	80755621	+	ABHD17C	protein_coding	956.291	2.13905	0.216538	9.87841	5.16467e-23	3.64119e-21
ENSG00000135775	1	230642481	230693982	+	COG2	protein_coding	690.897	-1.98114	0.200632	-9.8745	5.36999e-23	3.7716e-21
ENSG00000059728	2	69897688	69942945	+	MXD1	protein_coding	2023.19	3.5932	0.363905	9.874	5.39694e-23	3.77623e-21
ENSG00000163389	3	119468963	119494708	+	POGLUT1	protein_coding	341.529	-3.15156	0.319554	-9.86237	6.06036e-23	4.22448e-21
ENSG00000102879	16	30182827	30189076	+	CORO1A	protein_coding	168.64	3.95765	0.401451	9.85837	6.30668e-23	4.37972e-21
ENSG00000213923	22	38290691	38318084	-	CSNK1E	protein_coding	845.117	1.75021	0.177741	9.84696	7.06468e-23	4.88781e-21
ENSG00000128590	7	108569867	108574850	+	DNAJB9	protein_coding	759.981	1.37403	0.139748	9.83216	8.18427e-23	5.64136e-21
ENSG00000240498	9	21994139	22128103	+	CDKN2B-AS1	lncRNA	198.843	-3.19106	0.324673	-9.82853	8.4848e-23	5.82685e-21
ENSG00000004478	12	2794970	2805423	+	FKBP4	protein_coding	1519.35	1.5296	0.15582	9.8165	9.56088e-23	6.54162e-21
ENSG00000104140	15	40872214	40874234	-	RHOV	protein_coding	1181.91	2.82418	0.288049	9.80452	1.07656e-22	7.33883e-21
ENSG00000168264	1	234604269	234609525	-	IRF2BP2	protein_coding	1994.71	2.34458	0.239336	9.79618	1.16924e-22	7.9414e-21
ENSG00000132613	16	70661204	70686053	-	MTSS2	protein_coding	625.865	2.0593	0.210292	9.79255	1.21197e-22	8.20161e-21
ENSG00000144908	3	126103562	126197994	-	ALDH1L1	protein_coding	446.139	1.95838	0.200094	9.78726	1.27705e-22	8.61057e-21
ENSG00000198000	9	92297358	92325636	-	NOL8	protein_coding	863.667	-2.15811	0.220551	-9.78508	1.30489e-22	8.7664e-21
ENSG00000110628	11	2899721	2925246	+	SLC22A18	protein_coding	386.024	2.33352	0.238555	9.7819	1.34662e-22	9.01407e-21
ENSG00000167604	19	35887653	35902303	-	NFKBID	protein_coding	142.366	2.40198	0.245784	9.7727	1.47475e-22	9.83624e-21
ENSG00000260284	16	1286351	1288837	-	TPSP2	unprocessed_pseudogene	50.148	6.2896	0.64491	9.75267	1.79678e-22	1.19412e-20
ENSG00000130304	19	17468769	17506168	+	SLC27A1	protein_coding	540.21	1.88414	0.19327	9.74876	1.86729e-22	1.23655e-20
ENSG00000205413	7	93099513	93118023	-	SAMD9	protein_coding	4406.48	-2.92963	0.301389	-9.72044	2.46714e-22	1.62796e-20
ENSG00000221886	5	160393148	160400054	-	ZBED8	protein_coding	133.19	-2.49718	0.257233	-9.70787	2.79119e-22	1.83526e-20
ENSG00000111254	12	4615508	4649051	-	AKAP3	protein_coding	130.538	-3.28585	0.338632	-9.70333	2.91804e-22	1.91188e-20
ENSG00000116285	1	8004404	8026309	-	ERRFI1	protein_coding	1328.12	1.89092	0.194975	9.69828	3.06635e-22	2.00198e-20
ENSG00000125686	17	39404285	39451272	-	MED1	protein_coding	686.431	-1.6507	0.170364	-9.68925	3.34972e-22	2.17931e-20
ENSG00000075413	14	103385392	103503831	+	MARK3	protein_coding	1425.32	1.48588	0.153361	9.68881	3.36433e-22	2.18117e-20
ENSG00000142273	19	44777869	44800652	+	CBLC	protein_coding	532.823	1.73679	0.179431	9.67943	3.68759e-22	2.38242e-20
ENSG00000064703	1	111755245	111768000	+	DDX20	protein_coding	404.275	-2.19471	0.226767	-9.67827	3.72962e-22	2.4012e-20
ENSG00000131848	19	56219670	56368383	-	ZSCAN5A	protein_coding	149.624	-3.06268	0.316569	-9.67461	3.86579e-22	2.47486e-20
ENSG00000188215	16	20854925	20900358	-	DCUN1D3	protein_coding	377.889	2.11989	0.219121	9.67448	3.87072e-22	2.47486e-20
ENSG00000197265	8	30578318	30658236	-	GTF2E2	protein_coding	882.552	1.65223	0.17085	9.67061	4.01984e-22	2.56137e-20
ENSG00000134108	3	5122245	5180912	+	ARL8B	protein_coding	2614.5	1.47169	0.152292	9.66361	4.30423e-22	2.73319e-20
ENSG00000131849	19	58432814	58440153	-	ZNF132	protein_coding	224.775	-2.35093	0.243508	-9.65441	4.7084e-22	2.97963e-20
ENSG00000266094	1	206507531	206589448	+	RASSF5	protein_coding	753.438	2.18074	0.225905	9.65334	4.75796e-22	3.00075e-20
ENSG00000140835	16	71525233	71538746	+	CHST4	protein_coding	269.388	-2.72181	0.282171	-9.64598	5.11197e-22	3.21309e-20
ENSG00000165233	9	93096217	93113283	+	CARD19	protein_coding	387.669	2.06119	0.213902	9.63616	5.62525e-22	3.52377e-20
ENSG00000198464	19	52297169	52325922	+	ZNF480	protein_coding	352.828	-2.38068	0.247311	-9.62626	6.19423e-22	3.86712e-20
ENSG00000099194	10	100347233	100364826	+	SCD	protein_coding	21153.5	3.41851	0.355332	9.62061	6.54418e-22	4.05893e-20
ENSG00000136938	9	97983341	98015943	+	ANP32B	protein_coding	1077.53	1.78357	0.185391	9.62059	6.54525e-22	4.05893e-20
ENSG00000163312	4	83407343	83455855	-	HELQ	protein_coding	221.17	-2.42458	0.252365	-9.60744	7.43753e-22	4.59689e-20
ENSG00000151657	10	7750962	7787993	-	KIN	protein_coding	270.422	-2.29996	0.239986	-9.58371	9.36194e-22	5.76708e-20
ENSG00000125089	4	8182072	8241803	+	SH3TC1	protein_coding	273.66	3.03185	0.316616	9.57578	1.01094e-21	6.20689e-20
ENSG00000135763	1	229626247	229660200	+	URB2	protein_coding	107.134	-3.37203	0.352342	-9.57031	1.06583e-21	6.52231e-20
ENSG00000113369	5	91368631	91383317	-	ARRDC3	protein_coding	6172.32	-2.38105	0.24884	-9.56861	1.08352e-21	6.60878e-20
ENSG00000081181	14	67619920	67651708	+	ARG2	protein_coding	126.68	3.49147	0.364994	9.56581	1.11327e-21	6.76795e-20
ENSG00000118689	6	108559835	108684774	+	FOXO3	protein_coding	1300.11	2.62065	0.274014	9.56394	1.13362e-21	6.86917e-20
ENSG00000113742	5	173888349	173961980	+	CPEB4	protein_coding	1694.52	1.28032	0.134193	9.54085	1.41664e-21	8.55616e-20
ENSG00000176601	2	134964485	135047468	-	MAP3K19	protein_coding	2667.66	-1.60445	0.168502	-9.52185	1.7013e-21	1.0242e-19
ENSG00000213793	19	52904417	52923481	-	ZNF888	protein_coding	320.099	-2.01755	0.212015	-9.51606	1.79869e-21	1.07933e-19
ENSG00000155252	10	97640686	97676434	+	PI4K2A	protein_coding	924.564	2.45144	0.257833	9.50786	1.94621e-21	1.16409e-19
ENSG00000163947	3	56727418	57079329	-	ARHGEF3	protein_coding	780.745	1.31387	0.138203	9.50681	1.96604e-21	1.17217e-19
ENSG00000154642	21	17788974	17819386	-	C21orf91	protein_coding	582.433	-2.17111	0.22847	-9.50283	2.04259e-21	1.2139e-19
ENSG00000188994	6	87152833	87265943	+	ZNF292	protein_coding	1194.27	-1.87161	0.197062	-9.49757	2.14855e-21	1.27279e-19
ENSG00000111834	6	116616479	116632985	+	RSPH4A	protein_coding	2638.74	-1.60233	0.168763	-9.49456	2.21139e-21	1.30584e-19
ENSG00000197329	2	64092652	64144420	-	PELI1	protein_coding	1942.55	2.09797	0.221037	9.49151	2.27718e-21	1.34043e-19
ENSG00000181788	3	150741125	150763477	-	SIAH2	protein_coding	886.367	1.78417	0.187986	9.49099	2.28851e-21	1.34283e-19
ENSG00000275835	15	22983192	23039572	-	TUBGCP5	protein_coding	342.464	-1.81272	0.191122	-9.48457	2.43374e-21	1.42355e-19
ENSG00000172409	11	57648992	57661865	+	CLP1	protein_coding	238.318	-3.12924	0.330303	-9.47382	2.6978e-21	1.57304e-19
ENSG00000197063	17	81918270	81927735	-	MAFG	protein_coding	562.033	2.33015	0.246288	9.46107	3.04806e-21	1.7717e-19
ENSG00000155749	2	201288271	201357398	-	FLACC1	protein_coding	331.425	-2.04216	0.215933	-9.45737	3.15774e-21	1.82971e-19
ENSG00000139263	12	58872149	58920522	-	LRIG3	protein_coding	776.488	-2.26593	0.23984	-9.44767	3.4645e-21	2.00121e-19
ENSG00000049540	7	74027789	74069907	+	ELN	protein_coding	97.1105	-4.5802	0.485025	-9.44324	3.61433e-21	2.08127e-19
ENSG00000155755	2	201620184	201643570	-	TMEM237	protein_coding	401.273	-2.23225	0.236759	-9.42838	4.16453e-21	2.3833e-19
ENSG00000171448	9	122915566	122931512	-	ZBTB26	protein_coding	178.397	-2.20666	0.234042	-9.42851	4.1597e-21	2.3833e-19
ENSG00000197016	19	56567468	56588911	+	ZNF470	protein_coding	80.4531	-3.41977	0.363215	-9.41529	4.71795e-21	2.6917e-19
ENSG00000137878	15	57591908	57714745	+	GCOM1	protein_coding	188.77	3.12249	0.332113	9.40191	5.35826e-21	3.04764e-19
ENSG00000143153	1	169105697	169132722	+	ATP1B1	protein_coding	11609.6	1.59067	0.169205	9.40085	5.41239e-21	3.06681e-19
ENSG00000173914	11	66664998	66677887	-	RBM4B	protein_coding	378.707	-2.3137	0.246123	-9.4006	5.42505e-21	3.06681e-19
ENSG00000148926	11	10305073	10307397	+	ADM	protein_coding	1036.63	3.77913	0.402421	9.39098	5.94424e-21	3.35009e-19
ENSG00000204920	19	43967862	43998326	+	ZNF155	protein_coding	72.6298	-4.68022	0.498637	-9.38602	6.23076e-21	3.50093e-19
ENSG00000256294	19	44112181	44134822	+	AC021092.2	protein_coding	155.38	-3.55982	0.380044	-9.36688	7.47061e-21	4.1849e-19
ENSG00000140987	16	3382081	3401065	-	ZSCAN32	protein_coding	220.957	-3.32315	0.354823	-9.36564	7.55889e-21	4.2216e-19
ENSG00000106089	7	73699206	73719672	-	STX1A	protein_coding	210.54	2.86361	0.306211	9.35177	8.61941e-21	4.79943e-19
ENSG00000179071	11	85683848	85686195	-	CCDC89	protein_coding	284.063	-4.42629	0.47339	-9.35019	8.74869e-21	4.85683e-19
ENSG00000163104	4	94207611	94291292	+	SMARCAD1	protein_coding	999.078	-1.82933	0.195842	-9.34084	9.55744e-21	5.28997e-19
ENSG00000135315	6	84124241	84227643	-	CEP162	protein_coding	932.047	-2.00716	0.215227	-9.32575	1.10199e-20	6.08131e-19
ENSG00000174197	15	41621224	41773081	+	MGA	protein_coding	845.671	-1.58776	0.170714	-9.30069	1.3954e-20	7.6776e-19
ENSG00000167723	17	3510502	3557995	-	TRPV3	protein_coding	119.211	3.4847	0.374981	9.29301	1.49983e-20	8.22775e-19
ENSG00000145979	6	13266542	13328583	-	TBC1D7	protein_coding	644.014	1.99919	0.215153	9.29194	1.51496e-20	8.28623e-19
ENSG00000167984	16	3539033	3577403	-	NLRC3	protein_coding	254.381	-2.13933	0.230507	-9.28098	1.67929e-20	9.15804e-19
ENSG00000168209	10	72273924	72276036	+	DDIT4	protein_coding	2488.56	3.22641	0.347831	9.27579	1.76301e-20	9.58645e-19
ENSG00000142627	1	16124337	16156069	-	EPHA2	protein_coding	4674.96	2.31377	0.249579	9.27068	1.84962e-20	1.00279e-18
ENSG00000232931	2	95807052	95835003	-	LINC00342	lncRNA	3681.62	-2.10822	0.227494	-9.26714	1.91203e-20	1.03217e-18
ENSG00000256223	12	133130575	133159465	+	ZNF10	protein_coding	168.002	-3.71593	0.400986	-9.26698	1.91493e-20	1.03217e-18
ENSG00000065183	1	117929720	117966543	+	WDR3	protein_coding	782.253	-1.88462	0.203497	-9.26117	2.02204e-20	1.08675e-18
ENSG00000250479	22	23765834	23768443	-	CHCHD10	protein_coding	509.979	2.9316	0.316654	9.25804	2.0822e-20	1.11584e-18
ENSG00000114784	3	40309707	40312424	+	EIF1B	protein_coding	618.683	1.54301	0.166698	9.25636	2.11519e-20	1.13026e-18
ENSG00000124279	5	7859159	7869037	-	FASTKD3	protein_coding	184.127	-2.25344	0.243572	-9.25163	2.21087e-20	1.17799e-18
ENSG00000090013	19	40447765	40465764	-	BLVRB	protein_coding	1763.13	1.99288	0.215812	9.23432	2.59933e-20	1.381e-18
ENSG00000176714	2	27625639	27629012	-	CCDC121	protein_coding	220.476	-2.51454	0.272368	-9.23213	2.65303e-20	1.4055e-18
ENSG00000140199	15	34229784	34338060	-	SLC12A6	protein_coding	1487.53	1.49238	0.161692	9.22977	2.71211e-20	1.4327e-18
ENSG00000005801	11	3339261	3379222	-	ZNF195	protein_coding	534.605	-1.69708	0.184111	-9.21766	3.03661e-20	1.59957e-18
ENSG00000120694	13	31134973	31162388	-	HSPH1	protein_coding	7907.75	1.34661	0.146229	9.20888	3.29549e-20	1.73102e-18
ENSG00000119514	9	98807670	98850081	+	GALNT12	protein_coding	422.7	2.16338	0.234961	9.20739	3.34155e-20	1.74924e-18
ENSG00000181322	3	138261437	138329886	-	NME9	protein_coding	358.799	-1.78422	0.193786	-9.20715	3.34904e-20	1.74924e-18
ENSG00000279765	15	92883413	92949230	+	AC013394.1	protein_coding	123.676	3.73741	0.4063	9.19864	3.62492e-20	1.88801e-18
ENSG00000161642	12	54369133	54391298	-	ZNF385A	protein_coding	788.193	2.23925	0.243795	9.18497	4.11644e-20	2.13801e-18
ENSG00000075426	2	28392448	28417317	+	FOSL2	protein_coding	1746.64	2.1107	0.229972	9.17805	4.38956e-20	2.2735e-18
ENSG00000164627	6	39329990	39725408	-	KIF6	protein_coding	392.476	-1.61082	0.175516	-9.17767	4.40522e-20	2.27525e-18
ENSG00000165527	14	49893082	49897054	+	ARF6	protein_coding	2529.51	2.28414	0.249177	9.16673	4.87578e-20	2.5113e-18
ENSG00000166783	16	15594387	15643154	-	MARF1	protein_coding	1345.1	1.57271	0.171801	9.15431	5.47084e-20	2.80998e-18
ENSG00000223813	7	29514224	29563670	-	AC007255.1	lncRNA	101.31	-3.46651	0.378759	-9.15227	5.57479e-20	2.85546e-18
ENSG00000128309	22	37019635	37029822	+	MPST	protein_coding	499.369	2.29211	0.250468	9.15129	5.62582e-20	2.87366e-18
ENSG00000254685	1	74198212	74234086	+	FPGT	protein_coding	405.166	-2.07986	0.22736	-9.14788	5.80601e-20	2.95755e-18
ENSG00000174796	4	75513946	75550473	+	THAP6	protein_coding	322.111	-1.61617	0.176858	-9.13821	6.34931e-20	3.22545e-18
ENSG00000148426	10	11823339	11872277	+	PROSER2	protein_coding	379.182	2.81643	0.308374	9.13319	6.6512e-20	3.36958e-18
ENSG00000197057	4	36281622	36345756	+	DTHD1	protein_coding	3390.66	-2.0527	0.224837	-9.12972	6.86772e-20	3.46979e-18
ENSG00000179387	4	140524168	140553770	+	ELMOD2	protein_coding	1127.42	-1.50322	0.164875	-9.11735	7.69837e-20	3.87889e-18
ENSG00000107372	9	72351413	72365235	-	ZFAND5	protein_coding	3016.45	1.77629	0.194886	9.1145	7.90371e-20	3.97156e-18
ENSG00000175606	8	73972437	73982783	+	TMEM70	protein_coding	534.792	-2.22209	0.243917	-9.11005	8.23467e-20	4.12668e-18
ENSG00000174307	1	201464278	201469237	-	PHLDA3	protein_coding	1526.22	2.57865	0.283071	9.10956	8.27166e-20	4.13405e-18
ENSG00000126822	14	64704102	64750249	+	PLEKHG3	protein_coding	920.658	1.85393	0.203739	9.09951	9.07421e-20	4.52296e-18
ENSG00000135407	12	57797376	57818704	-	AVIL	protein_coding	78.5456	-4.38518	0.481978	-9.09829	9.17648e-20	4.56167e-18
ENSG00000108733	17	35574795	35578863	-	PEX12	protein_coding	125.215	-2.34255	0.25748	-9.09798	9.2025e-20	4.56237e-18
ENSG00000173334	8	125430358	125438403	+	TRIB1	protein_coding	494.456	2.33834	0.257187	9.09199	9.72454e-20	4.80833e-18
ENSG00000145780	5	115520908	115544775	-	FEM1C	protein_coding	799.329	1.40438	0.154508	9.08934	9.96431e-20	4.91379e-18
ENSG00000104290	8	28494205	28574267	+	FZD3	protein_coding	708.44	-1.75456	0.193217	-9.0808	1.07781e-19	5.30101e-18
ENSG00000148841	10	104309698	104338465	-	ITPRIP	protein_coding	755.314	3.59033	0.396014	9.06616	1.23286e-19	6.04754e-18
ENSG00000170832	17	60177327	60422470	-	USP32	protein_coding	1011	1.28552	0.141934	9.05714	1.3392e-19	6.55183e-18
ENSG00000158195	1	27404230	27490167	-	WASF2	protein_coding	2286.84	2.2755	0.251436	9.05001	1.4296e-19	6.97571e-18
ENSG00000158201	18	21650901	21704780	-	ABHD3	protein_coding	361.66	1.63978	0.181272	9.04597	1.48343e-19	7.21935e-18
ENSG00000198416	9	39443815	39508885	-	ZNF658B	transcribed_unprocessed_pseudogene	85.9906	-4.49918	0.497809	-9.03797	1.59608e-19	7.74727e-18
ENSG00000170364	3	4303304	4317567	+	SETMAR	protein_coding	179.02	-2.77096	0.30672	-9.03416	1.65261e-19	8.00069e-18
ENSG00000142657	1	10398592	10420511	+	PGD	protein_coding	7244.85	1.47671	0.163891	9.01034	2.05424e-19	9.91922e-18
ENSG00000152518	2	43222402	43226606	-	ZFP36L2	protein_coding	883.505	2.60797	0.289548	9.00705	2.11672e-19	1.01943e-17
ENSG00000119004	2	203238977	203306026	+	CYP20A1	protein_coding	403.295	-1.98521	0.220469	-9.0045	2.16659e-19	1.04075e-17
ENSG00000198346	19	53467733	53496255	+	ZNF813	protein_coding	117.898	-3.40136	0.377949	-8.99952	2.26712e-19	1.08623e-17
ENSG00000198919	3	108589705	108694840	+	DZIP3	protein_coding	4025.3	-1.4721	0.163657	-8.99503	2.36163e-19	1.12859e-17
ENSG00000167468	19	1103926	1106791	+	GPX4	protein_coding	2909.02	1.69416	0.188562	8.98461	2.59642e-19	1.2376e-17
ENSG00000144959	3	172630249	172711218	-	NCEH1	protein_coding	695.728	-1.61723	0.180034	-8.98291	2.63687e-19	1.25366e-17
ENSG00000136937	9	97633668	97673748	+	NCBP1	protein_coding	1039.53	-1.60748	0.178966	-8.98205	2.65767e-19	1.26032e-17
ENSG00000173846	1	44800377	44805990	+	PLK3	protein_coding	459.061	2.07603	0.231351	8.97352	2.87185e-19	1.35841e-17
ENSG00000111653	12	6650301	6663142	-	ING4	protein_coding	429.759	-1.52723	0.170304	-8.96763	3.02952e-19	1.42935e-17
ENSG00000130164	19	11089462	11133820	+	LDLR	protein_coding	2796.82	2.88471	0.322243	8.95197	3.49179e-19	1.64327e-17
ENSG00000276334	2	32521927	32523547	+	AL133243.2	lncRNA	58.9047	2.8501	0.318465	8.94949	3.57133e-19	1.67645e-17
ENSG00000139537	12	48904110	48931840	+	CCDC65	protein_coding	1877.92	-1.71638	0.191872	-8.94549	3.7032e-19	1.73396e-17
ENSG00000005469	7	87345681	87399795	+	CROT	protein_coding	806.718	-2.97094	0.332164	-8.94418	3.7472e-19	1.75014e-17
ENSG00000148735	10	113751262	113783429	+	PLEKHS1	protein_coding	2984.71	-1.61778	0.180995	-8.93824	3.95414e-19	1.84215e-17
ENSG00000117394	1	42925375	42958868	-	SLC2A1	protein_coding	7790.77	2.66626	0.29835	8.93669	4.00983e-19	1.86342e-17
ENSG00000105327	19	47220822	47232766	-	BBC3	protein_coding	410.069	3.17785	0.35561	8.93632	4.02337e-19	1.86503e-17
ENSG00000116001	2	70209444	70248660	-	TIA1	protein_coding	2484.07	-1.76978	0.198144	-8.93179	4.19182e-19	1.93827e-17
ENSG00000111913	6	24804282	25042170	-	RIPOR2	protein_coding	355.86	-2.47587	0.27724	-8.9304	4.24473e-19	1.95786e-17
ENSG00000108654	17	64498254	64508199	-	DDX5	protein_coding	20688.5	-1.54065	0.172837	-8.9139	4.92691e-19	2.26687e-17
ENSG00000198355	22	49960768	49964072	+	PIM3	protein_coding	2013.24	3.03455	0.340947	8.90035	5.5671e-19	2.55508e-17
ENSG00000100644	14	61695513	61748259	+	HIF1A	protein_coding	8528.8	1.59038	0.178693	8.90007	5.58095e-19	2.55511e-17
ENSG00000110660	11	107790991	107928293	-	SLC35F2	protein_coding	313.937	2.59712	0.292002	8.8942	5.8842e-19	2.68731e-17
ENSG00000148672	10	87050202	87094843	-	GLUD1	protein_coding	3845	1.65825	0.18649	8.89192	6.00615e-19	2.73627e-17
ENSG00000031003	5	137937960	138051961	-	FAM13B	protein_coding	572.043	-1.90495	0.214265	-8.89061	6.07733e-19	2.76191e-17
ENSG00000142623	1	17205128	17246007	+	PADI1	protein_coding	3439.02	2.83679	0.319168	8.88807	6.2178e-19	2.81884e-17
ENSG00000137699	11	120111286	120185529	-	TRIM29	protein_coding	8363.75	1.75881	0.197892	8.88772	6.23766e-19	2.82094e-17
ENSG00000092439	15	50552473	50686797	-	TRPM7	protein_coding	1103.14	-1.69895	0.191177	-8.8868	6.28915e-19	2.83731e-17
ENSG00000139112	12	10212458	10223128	+	GABARAPL1	protein_coding	936.161	1.75304	0.19734	8.88338	6.4859e-19	2.91897e-17
ENSG00000178935	19	57803841	57814913	-	ZNF552	protein_coding	312.328	-2.52524	0.284588	-8.87333	7.09919e-19	3.18724e-17
ENSG00000214711	2	31173056	31233858	-	CAPN14	protein_coding	595.287	3.82565	0.431282	8.8704	7.28813e-19	3.26417e-17
ENSG00000229124	10	17214239	17229985	-	VIM-AS1	lncRNA	127.639	-2.67549	0.301648	-8.86956	7.34369e-19	3.28112e-17
ENSG00000157502	X	106168305	106208956	+	PWWP3B	protein_coding	116.794	-4.2489	0.47939	-8.86314	7.77937e-19	3.46743e-17
ENSG00000138642	4	88378739	88443111	+	HERC6	protein_coding	981.418	-3.25718	0.367511	-8.86283	7.80097e-19	3.46872e-17
ENSG00000167981	16	3432414	3443504	-	ZNF597	protein_coding	156.646	-2.52009	0.284401	-8.86104	7.92731e-19	3.51646e-17
ENSG00000104824	19	38836388	38852347	-	HNRNPL	protein_coding	1163.03	1.37014	0.154662	8.85894	8.07806e-19	3.57478e-17
ENSG00000126773	14	60091911	60169133	+	PCNX4	protein_coding	1689.73	-1.56367	0.176592	-8.85468	8.39226e-19	3.70498e-17
ENSG00000224870	1	1399520	1402046	+	MRPL20-AS1	lncRNA	94.5079	-3.0239	0.341581	-8.85266	8.54562e-19	3.76373e-17
ENSG00000154309	1	222872271	223005995	+	DISP1	protein_coding	67.1318	-3.87672	0.438121	-8.84852	8.86846e-19	3.89666e-17
ENSG00000088179	2	119759922	119984899	+	PTPN4	protein_coding	464.526	-1.58256	0.178958	-8.8432	9.30175e-19	4.07738e-17
ENSG00000169231	1	155195588	155209051	-	THBS3	protein_coding	405.412	-1.89904	0.215217	-8.82385	1.10594e-18	4.83642e-17
ENSG00000176092	1	26321698	26360080	-	CRYBG2	protein_coding	468.544	2.80745	0.318193	8.82311	1.11328e-18	4.85705e-17
ENSG00000149313	11	106075501	106098699	+	AASDHPPT	protein_coding	897.357	-1.91353	0.216943	-8.82045	1.13997e-18	4.9618e-17
ENSG00000167779	12	53097436	53102345	+	IGFBP6	protein_coding	766.998	3.11315	0.352978	8.81969	1.14775e-18	4.984e-17
ENSG00000236287	11	10812074	10858796	-	ZBED5	protein_coding	1005.4	-1.87328	0.212456	-8.81726	1.17292e-18	5.08139e-17
ENSG00000130517	19	18340598	18369950	+	PGPEP1	protein_coding	724.45	1.47549	0.167438	8.81211	1.22817e-18	5.30831e-17
ENSG00000112033	6	35342558	35428191	+	PPARD	protein_coding	421.108	1.94152	0.220498	8.80517	1.30649e-18	5.63371e-17
ENSG00000080200	3	97822011	97944984	+	CRYBG3	protein_coding	1150.35	-1.87061	0.212624	-8.79776	1.39572e-18	6.00451e-17
ENSG00000116678	1	65420652	65641559	+	LEPR	protein_coding	231.038	1.92569	0.218974	8.79417	1.44114e-18	6.18554e-17
ENSG00000009413	6	111299028	111483715	-	REV3L	protein_coding	912.479	-1.75889	0.200204	-8.78549	1.55683e-18	6.6667e-17
ENSG00000255303	11	57861948	57873588	-	OR5BA1P	transcribed_unprocessed_pseudogene	64.1899	-8.89438	1.01255	-8.78412	1.5759e-18	6.7328e-17
ENSG00000113615	5	134648785	134727909	+	SEC24A	protein_coding	961.286	1.37367	0.156442	8.78072	1.62438e-18	6.92397e-17
ENSG00000004864	7	96120220	96322147	-	SLC25A13	protein_coding	493.399	-1.66768	0.190065	-8.77429	1.71984e-18	7.31407e-17
ENSG00000115423	2	84516455	84819589	+	DNAH6	protein_coding	4264.04	-1.71589	0.195614	-8.7718	1.75836e-18	7.46075e-17
ENSG00000287401	4	76240740	76312098	-	AC034139.1	lncRNA	72.7124	-8.39308	0.956879	-8.77131	1.76604e-18	7.47625e-17
ENSG00000125775	20	1309909	1329139	-	SDCBP2	protein_coding	754.287	2.43698	0.278046	8.76467	1.87333e-18	7.91236e-17
ENSG00000090776	X	68829021	68842160	+	EFNB1	protein_coding	764.069	2.33536	0.266573	8.76068	1.9408e-18	8.17871e-17
ENSG00000010539	16	3222325	3236221	-	ZNF200	protein_coding	168.814	-2.67798	0.305714	-8.75977	1.95649e-18	8.22614e-17
ENSG00000112081	6	36594353	36605600	+	SRSF3	protein_coding	4601.87	-1.93869	0.221454	-8.75436	2.05261e-18	8.61073e-17
ENSG00000067955	16	67028984	67101058	+	CBFB	protein_coding	574.743	1.29146	0.147537	8.75352	2.06804e-18	8.6559e-17
ENSG00000103642	15	63121833	63142061	+	LACTB	protein_coding	329.162	1.816	0.207488	8.75232	2.09002e-18	8.72817e-17
ENSG00000107864	10	92046692	92291078	-	CPEB3	protein_coding	221.876	1.83202	0.209474	8.74582	2.21393e-18	9.22486e-17
ENSG00000119917	10	89327997	89340971	+	IFIT3	protein_coding	1492.62	-5.28462	0.604657	-8.73986	2.33393e-18	9.70309e-17
ENSG00000187446	15	41230839	41281887	+	CHP1	protein_coding	2342.47	2.1976	0.252067	8.71829	2.82434e-18	1.17157e-16
ENSG00000099875	19	2037465	2051244	-	MKNK2	protein_coding	3213.52	2.25613	0.258847	8.71609	2.87968e-18	1.19185e-16
ENSG00000166189	10	102065349	102068036	+	HPS6	protein_coding	172.077	-3.09529	0.355487	-8.70717	3.11555e-18	1.2866e-16
ENSG00000146112	6	30676389	30687895	-	PPP1R18	protein_coding	401.011	2.72246	0.312726	8.7056	3.15907e-18	1.30168e-16
ENSG00000101361	20	2652593	2658393	+	NOP56	protein_coding	1276.07	-1.94868	0.223983	-8.70015	3.31446e-18	1.36267e-16
ENSG00000163993	4	6693878	6697170	+	S100P	protein_coding	6360.9	2.84375	0.326967	8.69736	3.39693e-18	1.39042e-16
ENSG00000170854	3	97941818	97972457	-	RIOX2	protein_coding	550.326	-1.5366	0.17667	-8.69758	3.3903e-18	1.39042e-16
ENSG00000168497	2	191834310	191847088	-	CAVIN2	protein_coding	67.2975	-6.13597	0.705768	-8.69403	3.49798e-18	1.42862e-16
ENSG00000224660	3	15254184	15264515	+	SH3BP5-AS1	lncRNA	116.148	-2.37575	0.273431	-8.68864	3.66792e-18	1.49474e-16
ENSG00000215251	20	3146519	3159865	-	FASTKD5	protein_coding	641.69	-1.78252	0.205166	-8.68818	3.68293e-18	1.49756e-16
ENSG00000117751	1	27830782	27851676	+	PPP1R8	protein_coding	665.14	-1.69144	0.194732	-8.68601	3.75388e-18	1.52307e-16
ENSG00000214029	12	133106817	133130473	-	ZNF891	protein_coding	153.963	-2.55415	0.29407	-8.68551	3.77037e-18	1.52642e-16
ENSG00000100461	14	22893204	22919182	-	RBM23	protein_coding	1123.41	-1.13266	0.130413	-8.68517	3.78191e-18	1.52776e-16
ENSG00000260804	2	216217045	216220192	+	LINC01963	lncRNA	91.9793	-3.25211	0.374705	-8.67912	3.9885e-18	1.60771e-16
ENSG00000164209	5	110738136	110765161	+	SLC25A46	protein_coding	1141.92	-1.44586	0.166825	-8.66692	4.43973e-18	1.78572e-16
ENSG00000117501	1	170935471	171064765	+	MROH9	protein_coding	874.966	-2.14063	0.247283	-8.6566	4.86046e-18	1.95071e-16
ENSG00000175197	12	57516588	57521737	-	DDIT3	protein_coding	710.922	3.65908	0.422943	8.65148	5.08379e-18	2.03593e-16
ENSG00000197670	20	53552770	53575863	+	AL157838.1	lncRNA	162.025	3.38888	0.392217	8.64033	5.6052e-18	2.23991e-16
ENSG00000148339	9	128068201	128109245	+	SLC25A25	protein_coding	318.516	2.5534	0.295545	8.63962	5.64021e-18	2.24905e-16
ENSG00000008294	17	50962174	51120868	-	SPAG9	protein_coding	1691.12	1.38195	0.160013	8.63646	5.79799e-18	2.307e-16
ENSG00000171223	19	12791486	12793315	+	JUNB	protein_coding	2458.55	3.08298	0.357309	8.62835	6.22436e-18	2.47135e-16
ENSG00000135090	12	118149801	118372907	-	TAOK3	protein_coding	630.369	1.35976	0.157621	8.62679	6.30996e-18	2.49999e-16
ENSG00000112983	5	138139766	138178986	-	BRD8	protein_coding	813.063	-1.54993	0.179673	-8.62641	6.3308e-18	2.50289e-16
ENSG00000185022	22	38200767	38216507	+	MAFF	protein_coding	579.744	3.54794	0.411349	8.62514	6.40156e-18	2.52548e-16
ENSG00000153558	3	33277025	33403662	+	FBXL2	protein_coding	795.768	-1.68241	0.195145	-8.62132	6.6184e-18	2.60548e-16
ENSG00000176024	19	51927147	51948759	+	ZNF613	protein_coding	85.0783	-2.84337	0.330349	-8.60717	7.48832e-18	2.94171e-16
ENSG00000142867	1	85265776	85276632	-	BCL10	protein_coding	739.058	2.1376	0.248902	8.58811	8.84101e-18	3.46575e-16
ENSG00000109846	11	111908564	111923722	-	CRYAB	protein_coding	1345.92	5.76728	0.671595	8.58744	8.89296e-18	3.47876e-16
ENSG00000032742	13	20567069	20691437	+	IFT88	protein_coding	1301.04	-1.36297	0.158775	-8.58429	9.14019e-18	3.56794e-16
ENSG00000006831	12	1688574	1788674	+	ADIPOR2	protein_coding	930.114	1.58229	0.184422	8.57971	9.5111e-18	3.70493e-16
ENSG00000151651	10	133262420	133276868	-	ADAM8	protein_coding	338.223	2.6693	0.311683	8.56415	1.08873e-17	4.23214e-16
ENSG00000100583	14	77376689	77391497	+	SAMD15	protein_coding	1066.16	-1.99448	0.233033	-8.55875	1.14093e-17	4.42577e-16
ENSG00000133028	17	10672474	10698375	-	SCO1	protein_coding	594.944	-1.74482	0.203898	-8.55733	1.15507e-17	4.46196e-16
ENSG00000180509	21	34446688	34512210	-	KCNE1	protein_coding	349.499	-2.78044	0.324917	-8.55736	1.15479e-17	4.46196e-16
ENSG00000184897	3	129314771	129316286	-	H1-10	protein_coding	697.667	2.78847	0.326	8.55358	1.19332e-17	4.59192e-16
ENSG00000197442	6	136557046	136792477	-	MAP3K5	protein_coding	1142.97	1.36387	0.159451	8.55354	1.19367e-17	4.59192e-16
ENSG00000137040	9	6011025	6015625	-	RANBP6	protein_coding	1060.47	-1.76802	0.206822	-8.54852	1.24681e-17	4.78642e-16
ENSG00000129465	14	24336025	24340022	-	RIPK3	protein_coding	127.875	-2.35464	0.27547	-8.54773	1.25536e-17	4.80927e-16
ENSG00000051341	3	121431427	121546641	-	POLQ	protein_coding	278.495	-2.78058	0.325436	-8.54419	1.29446e-17	4.94885e-16
ENSG00000136932	9	97904489	97922516	-	TRMO	protein_coding	298.987	-2.45027	0.286923	-8.5398	1.34452e-17	5.12966e-16
ENSG00000080371	12	71754863	71800286	+	RAB21	protein_coding	644.712	1.68407	0.197717	8.5176	1.62889e-17	6.20181e-16
ENSG00000105887	7	135926760	135977359	-	MTPN	protein_coding	4554.78	1.17193	0.137893	8.49886	1.91455e-17	7.2745e-16
ENSG00000141380	18	26016253	26091217	-	SS18	protein_coding	1682.73	-0.983094	0.115836	-8.48697	2.12103e-17	8.04257e-16
ENSG00000146243	6	78867551	78946440	+	IRAK1BP1	protein_coding	355.755	-1.88364	0.221994	-8.48511	2.15511e-17	8.15512e-16
ENSG00000167858	17	6789133	6831761	-	TEKT1	protein_coding	3918.9	-1.73239	0.204201	-8.48374	2.1807e-17	8.23513e-16
ENSG00000067533	1	218285293	218337983	+	RRP15	protein_coding	241.541	-2.47955	0.292427	-8.47921	2.26736e-17	8.54498e-16
ENSG00000230590	X	73940435	74293574	-	FTX	lncRNA	815.982	-2.14901	0.253462	-8.47863	2.2786e-17	8.56995e-16
ENSG00000138496	3	122527924	122564577	-	PARP9	protein_coding	2230.27	-2.47064	0.291476	-8.4763	2.32477e-17	8.72589e-16
ENSG00000240225	19	56368099	56379828	+	ZNF542P	transcribed_unprocessed_pseudogene	209.001	-1.92785	0.227647	-8.46861	2.4834e-17	9.30247e-16
ENSG00000260710	16	1294551	1299166	-	AC120498.4	lncRNA	38.4448	9.35273	1.10466	8.46659	2.52683e-17	9.44606e-16
ENSG00000147065	X	65588377	65741931	+	MSN	protein_coding	2730.52	2.27887	0.269169	8.46633	2.53247e-17	9.44809e-16
ENSG00000172216	20	50190830	50192668	+	CEBPB	protein_coding	1418.62	3.29411	0.3891	8.46598	2.53997e-17	9.45707e-16
ENSG00000181004	4	122732702	122744942	+	BBS12	protein_coding	444.206	-2.03217	0.24017	-8.46137	2.64259e-17	9.81943e-16
ENSG00000087460	20	58839718	58911192	+	GNAS	protein_coding	6422.89	1.70824	0.201949	8.45879	2.70156e-17	1.00185e-15
ENSG00000107341	9	33817160	33920399	+	UBE2R2	protein_coding	688.543	1.91652	0.226664	8.45533	2.7829e-17	1.02995e-15
ENSG00000107404	1	1335276	1349418	-	DVL1	protein_coding	1040.6	2.16354	0.256014	8.45089	2.89086e-17	1.06778e-15
ENSG00000177352	3	49162535	49166331	-	CCDC71	protein_coding	283.586	-3.2093	0.379825	-8.44942	2.92752e-17	1.07917e-15
ENSG00000198435	9	137299631	137302271	-	NRARP	protein_coding	476.913	2.32675	0.275386	8.44906	2.93649e-17	1.08033e-15
ENSG00000271270	3	129893811	129918575	+	TMCC1-AS1	lncRNA	57.968	-3.74971	0.444025	-8.44481	3.04533e-17	1.11815e-15
ENSG00000203326	19	53365693	53392217	+	ZNF525	protein_coding	142.802	-2.10253	0.24914	-8.43914	3.19688e-17	1.17147e-15
ENSG00000160691	1	154962298	154974395	-	SHC1	protein_coding	1644.16	2.13294	0.252877	8.43469	3.32071e-17	1.21445e-15
ENSG00000136688	2	112973203	112985658	+	IL36G	protein_coding	542.48	3.32243	0.394016	8.43223	3.39129e-17	1.23782e-15
ENSG00000152683	2	32165841	32224379	+	SLC30A6	protein_coding	494.449	-1.69567	0.201157	-8.42956	3.46962e-17	1.26392e-15
ENSG00000166261	11	123723914	123741675	-	ZNF202	protein_coding	171.191	-2.17482	0.258102	-8.42619	3.57101e-17	1.29831e-15
ENSG00000285684	13	80115733	80134368	-	AL137781.1	lncRNA	110.843	-4.67305	0.554644	-8.42531	3.59798e-17	1.30555e-15
ENSG00000106665	7	74289407	74405935	+	CLIP2	protein_coding	183.18	2.77682	0.32973	8.42148	3.71766e-17	1.3458e-15
ENSG00000109689	4	26857601	27025381	+	STIM2	protein_coding	1007.36	-1.49019	0.176955	-8.4213	3.7234e-17	1.3458e-15
ENSG00000223991	2	240981515	240986072	-	AC104809.1	lncRNA	73.2771	-6.14444	0.72982	-8.41911	3.79345e-17	1.36845e-15
ENSG00000124782	6	7107597	7251980	+	RREB1	protein_coding	1213.68	1.74217	0.206953	8.41819	3.82353e-17	1.37662e-15
ENSG00000213445	11	65638101	65650918	+	SIPA1	protein_coding	298.787	2.73023	0.32442	8.41572	3.90491e-17	1.4032e-15
ENSG00000185043	15	90229975	90234047	-	CIB1	protein_coding	4202.9	1.162	0.138096	8.41443	3.94801e-17	1.41594e-15
ENSG00000127452	19	9810267	9827816	-	FBXL12	protein_coding	216.039	1.83348	0.217934	8.41299	3.99691e-17	1.43071e-15
ENSG00000155393	16	50065970	50107272	+	HEATR3	protein_coding	461.146	-2.04464	0.243094	-8.4109	4.06872e-17	1.45361e-15
ENSG00000105058	19	16185380	16192046	+	FAM32A	protein_coding	1335.6	-1.16536	0.138594	-8.40847	4.15388e-17	1.48118e-15
ENSG00000137628	4	168216294	168318804	-	DDX60	protein_coding	2074.32	-3.21036	0.38199	-8.40431	4.30386e-17	1.53171e-15
ENSG00000196743	5	151212150	151270440	+	GM2A	protein_coding	3314.05	1.62365	0.19329	8.40009	4.46134e-17	1.58472e-15
ENSG00000165675	X	130623369	130903317	-	ENOX2	protein_coding	486.657	-1.54113	0.183493	-8.39883	4.50953e-17	1.59877e-15
ENSG00000171612	1	9539465	9585173	+	SLC25A33	protein_coding	213.458	1.86053	0.221613	8.39541	4.64277e-17	1.64287e-15
ENSG00000121039	8	73294602	73325281	+	RDH10	protein_coding	5029.58	1.66081	0.198106	8.38343	5.14075e-17	1.81561e-15
ENSG00000188910	1	34781214	34786369	+	GJB3	protein_coding	865.723	2.64275	0.315253	8.38296	5.1612e-17	1.81937e-15
ENSG00000172818	11	65787063	65797214	+	OVOL1	protein_coding	318.564	3.18722	0.380325	8.38025	5.28155e-17	1.85827e-15
ENSG00000232656	10	1022630	1045425	+	IDI2-AS1	lncRNA	118.938	3.4028	0.406227	8.3766	5.44809e-17	1.91323e-15
ENSG00000125148	16	56608584	56609497	+	MT2A	protein_coding	9831.43	2.24523	0.268089	8.37493	5.52579e-17	1.93685e-15
ENSG00000213719	6	31730581	31739763	-	CLIC1	protein_coding	4768.55	1.44795	0.172925	8.37328	5.60354e-17	1.96039e-15
ENSG00000189077	7	75986831	75994656	-	TMEM120A	protein_coding	388.949	1.32423	0.158188	8.37125	5.7011e-17	1.99077e-15
ENSG00000139505	13	25246201	25288009	-	MTMR6	protein_coding	1396.35	-1.26861	0.151634	-8.36624	5.94857e-17	2.07328e-15
ENSG00000223461	22	19121529	19124503	+	AC004471.1	lncRNA	35.2684	5.05754	0.604645	8.36448	6.03789e-17	2.10046e-15
ENSG00000133226	1	24631716	24673281	+	SRRM1	protein_coding	1573.78	1.24017	0.148329	8.36096	6.22089e-17	2.148e-15
ENSG00000135829	1	182839347	182887982	+	DHX9	protein_coding	3919.73	-1.35723	0.162328	-8.36104	6.21687e-17	2.148e-15
ENSG00000177932	5	179060373	179083977	+	ZNF354C	protein_coding	110.655	-3.2869	0.393107	-8.36134	6.20087e-17	2.148e-15
ENSG00000257335	7	141907813	142106747	+	MGAM	protein_coding	320.343	-3.23195	0.38653	-8.36145	6.19544e-17	2.148e-15
ENSG00000184292	1	58575433	58577252	-	TACSTD2	protein_coding	25223.6	2.16564	0.259064	8.35947	6.30021e-17	2.17135e-15
ENSG00000145283	4	86823468	86849384	-	SLC10A6	protein_coding	164.147	3.2675	0.390896	8.35899	6.32552e-17	2.17603e-15
ENSG00000159788	4	3293028	3439913	+	RGS12	protein_coding	970.901	1.66309	0.19899	8.35766	6.39731e-17	2.19665e-15
ENSG00000134046	18	54151606	54224669	-	MBD2	protein_coding	1090.11	1.51365	0.181124	8.35699	6.4341e-17	2.2052e-15
ENSG00000168137	3	9397615	9479240	+	SETD5	protein_coding	2316.93	1.37079	0.164075	8.35469	6.56034e-17	2.24431e-15
ENSG00000241112	5	149545383	149545810	-	RPL29P14	processed_pseudogene	36.1701	3.77437	0.451815	8.35381	6.60982e-17	2.25708e-15
ENSG00000269967	1	31851913	31921841	-	AL136115.2	lncRNA	37.8328	6.105	0.731273	8.34846	6.91593e-17	2.35726e-15
ENSG00000165923	11	47659591	47715389	-	AGBL2	protein_coding	1033.75	-1.37388	0.164825	-8.33537	7.72566e-17	2.62842e-15
ENSG00000253671	8	17808361	17822183	+	AC027117.1	lncRNA	258.049	-2.55676	0.306783	-8.33411	7.80855e-17	2.65176e-15
ENSG00000062725	17	60443158	60526242	-	APPBP2	protein_coding	666.913	-1.22761	0.147309	-8.33357	7.84393e-17	2.65891e-15
ENSG00000198774	12	85800703	85836409	-	RASSF9	protein_coding	450.964	-2.09236	0.251276	-8.32693	8.29624e-17	2.8071e-15
ENSG00000106692	9	105558130	105641118	+	FKTN	protein_coding	546.697	-1.47435	0.17719	-8.32072	8.74289e-17	2.95283e-15
ENSG00000247556	15	41283990	41309737	+	OIP5-AS1	lncRNA	3688.96	0.932476	0.112092	8.31887	8.88092e-17	2.994e-15
ENSG00000070756	8	100685816	100722809	-	PABPC1	protein_coding	10734.7	2.03608	0.244781	8.31796	8.94928e-17	3.01157e-15
ENSG00000174485	15	65658046	65792293	-	DENND4A	protein_coding	748.329	-1.29052	0.155389	-8.30512	9.97174e-17	3.34957e-15
ENSG00000060762	6	166364919	166383013	-	MPC1	protein_coding	909.811	1.72616	0.207889	8.30329	1.01263e-16	3.39534e-15
ENSG00000112584	6	170290703	170407065	+	FAM120B	protein_coding	1102.17	-1.5104	0.181963	-8.30063	1.0356e-16	3.46607e-15
ENSG00000170113	15	22773063	22829789	+	NIPA1	protein_coding	500.662	1.49604	0.18047	8.28966	1.13576e-16	3.79446e-15
ENSG00000162923	1	224385143	224437033	-	WDR26	protein_coding	2395.69	1.15733	0.139665	8.28651	1.16616e-16	3.88903e-15
ENSG00000184731	2	38814	46870	-	FAM110C	protein_coding	483.715	1.81231	0.218834	8.28165	1.2148e-16	4.04397e-15
ENSG00000273247	4	139411927	139454034	-	AC097376.3	lncRNA	48.8848	-4.56864	0.551761	-8.28011	1.23063e-16	4.08932e-15
ENSG00000163811	2	28894667	28948219	+	WDR43	protein_coding	960.736	-1.87314	0.226305	-8.27706	1.26249e-16	4.18767e-15
ENSG00000125968	20	31605283	31606515	+	ID1	protein_coding	5394.39	2.15839	0.260789	8.27638	1.26978e-16	4.20433e-15
ENSG00000286028	11	111510600	111513888	+	AP002008.4	lncRNA	75.1236	-6.44609	0.778923	-8.27565	1.27755e-16	4.22252e-15
ENSG00000162413	1	6590724	6614607	-	KLHL21	protein_coding	967.24	2.02392	0.244606	8.27421	1.29309e-16	4.26628e-15
ENSG00000166828	16	23182745	23216883	+	SCNN1G	protein_coding	62.0445	3.32327	0.401694	8.27313	1.30486e-16	4.29748e-15
ENSG00000108352	17	40177010	40195656	+	RAPGEFL1	protein_coding	2474.15	2.00312	0.242151	8.27222	1.31492e-16	4.31935e-15
ENSG00000147124	X	47445879	47482946	-	ZNF41	protein_coding	207.114	-1.95664	0.236535	-8.2721	1.31617e-16	4.31935e-15
ENSG00000047634	X	17737449	17754988	+	SCML1	protein_coding	354.964	2.29711	0.277872	8.26681	1.37596e-16	4.50761e-15
ENSG00000176102	11	33077188	33162371	-	CSTF3	protein_coding	547.872	-2.00336	0.242367	-8.26581	1.3875e-16	4.53739e-15
ENSG00000149922	16	30085793	30091887	-	TBX6	protein_coding	139.922	2.5132	0.304167	8.26256	1.42585e-16	4.6546e-15
ENSG00000137492	11	76349956	76381132	-	THAP12	protein_coding	617.747	-1.93851	0.234753	-8.25767	1.48538e-16	4.84042e-15
ENSG00000179941	12	76344474	76348415	-	BBS10	protein_coding	471.675	-1.85692	0.22503	-8.25187	1.5594e-16	5.07269e-15
ENSG00000101266	20	472498	543835	-	CSNK2A1	protein_coding	3257.65	1.10654	0.134132	8.24965	1.58857e-16	5.15853e-15
ENSG00000168016	3	36826820	36945098	-	TRANK1	protein_coding	619.83	-2.33789	0.283429	-8.24861	1.60254e-16	5.1948e-15
ENSG00000188321	19	9323772	9351162	+	ZNF559	protein_coding	141.404	-3.08055	0.373559	-8.2465	1.63101e-16	5.27786e-15
ENSG00000181885	17	7259903	7263983	-	CLDN7	protein_coding	3007.51	1.86855	0.226597	8.24613	1.63607e-16	5.28501e-15
ENSG00000129194	17	7588178	7590094	-	SOX15	protein_coding	458.602	2.43112	0.295188	8.23584	1.78298e-16	5.74955e-15
ENSG00000130513	19	18374731	18389176	+	GDF15	protein_coding	8396.6	4.69632	0.571043	8.22411	1.96646e-16	6.33023e-15
ENSG00000254087	8	55879835	56014169	+	LYN	protein_coding	1491.33	1.85614	0.225819	8.21959	2.042e-16	6.56201e-15
ENSG00000058729	5	97160867	97183247	-	RIOK2	protein_coding	440.474	-1.99961	0.243479	-8.21262	2.16405e-16	6.94218e-15
ENSG00000245849	15	40686183	40695107	-	RAD51-AS1	lncRNA	122.923	-3.02993	0.369494	-8.20021	2.39976e-16	7.68502e-15
ENSG00000100439	14	22598237	22613215	+	ABHD4	protein_coding	743.912	1.3562	0.165474	8.19588	2.4877e-16	7.95291e-15
ENSG00000181634	9	114784652	114806039	-	TNFSF15	protein_coding	59.8905	-8.38345	1.02315	-8.19373	2.53252e-16	8.08227e-15
ENSG00000127527	19	16355239	16472085	-	EPS15L1	protein_coding	481.006	1.63613	0.199819	8.18809	2.65394e-16	8.45522e-15
ENSG00000117000	1	40161387	40240921	+	RLF	protein_coding	726.474	-1.98901	0.242925	-8.18776	2.66144e-16	8.46455e-15
ENSG00000198040	12	133037292	133063304	+	ZNF84	protein_coding	780.297	-1.44655	0.176912	-8.17668	2.91763e-16	9.26348e-15
ENSG00000011638	16	21158377	21180616	+	TMEM159	protein_coding	1012.51	2.00888	0.245976	8.16696	3.16252e-16	1.00238e-14
ENSG00000137275	6	3063991	3115187	+	RIPK1	protein_coding	305.193	-2.21246	0.271059	-8.1623	3.28705e-16	1.04008e-14
ENSG00000137331	6	30743199	30744548	-	IER3	protein_coding	439.361	3.11097	0.381712	8.15006	3.63742e-16	1.14898e-14
ENSG00000141232	17	50862223	50867978	-	TOB1	protein_coding	976.509	2.17064	0.266478	8.14567	3.77194e-16	1.18742e-14
ENSG00000171813	10	132397168	132417859	+	PWWP2B	protein_coding	557.991	1.97132	0.242003	8.14587	3.76569e-16	1.18742e-14
ENSG00000279348	2	216211404	216213519	+	AC012513.3	TEC	64.6561	-3.46066	0.424908	-8.14451	3.80824e-16	1.19682e-14
ENSG00000151366	11	78068297	78079862	-	NDUFC2	protein_coding	136.533	-2.26309	0.278117	-8.13721	4.04479e-16	1.26901e-14
ENSG00000053372	1	19251805	19260128	+	MRTO4	protein_coding	315.561	-1.61077	0.197957	-8.13695	4.05363e-16	1.26964e-14
ENSG00000172893	11	71428193	71452868	-	DHCR7	protein_coding	754.915	2.86041	0.351708	8.13291	4.19106e-16	1.31046e-14
ENSG00000183340	11	96389989	96507574	+	JRKL	protein_coding	420.956	-1.53293	0.188524	-8.13122	4.25004e-16	1.32667e-14
ENSG00000247095	11	565660	568457	-	MIR210HG	lncRNA	69.3097	-7.80617	0.960804	-8.12462	4.48753e-16	1.39845e-14
ENSG00000172296	20	13008972	13169103	+	SPTLC3	protein_coding	340.055	-1.7591	0.216531	-8.12401	4.51017e-16	1.40315e-14
ENSG00000126803	14	64535905	64546173	+	HSPA2	protein_coding	140.497	3.23377	0.398092	8.12317	4.54149e-16	1.41053e-14
ENSG00000197852	1	111680630	111755824	-	INKA2	protein_coding	62.8617	-3.08279	0.379605	-8.12104	4.62187e-16	1.43309e-14
ENSG00000164219	5	115204012	115262877	-	PGGT1B	protein_coding	826.283	-1.49083	0.183633	-8.11852	4.71888e-16	1.46072e-14
ENSG00000165555	14	77394021	77423517	-	NOXRED1	protein_coding	134.597	-2.25461	0.277782	-8.11648	4.79918e-16	1.48311e-14
ENSG00000181381	4	168356735	168537786	-	DDX60L	protein_coding	1505.65	-3.07236	0.378658	-8.11382	4.90545e-16	1.51343e-14
ENSG00000167508	16	88651935	88663161	-	MVD	protein_coding	604.74	2.53484	0.312439	8.11306	4.93615e-16	1.52037e-14
ENSG00000225855	1	155316863	155324176	-	RUSC1-AS1	lncRNA	173.884	2.41072	0.29721	8.11116	5.01371e-16	1.5417e-14
ENSG00000172840	16	66878589	66895754	+	PDP2	protein_coding	367.751	1.6802	0.207188	8.10954	5.08128e-16	1.55989e-14
ENSG00000110768	11	18322295	18367045	+	GTF2H1	protein_coding	1147.79	-1.58587	0.195663	-8.10514	5.26849e-16	1.61468e-14
ENSG00000157578	21	39405844	39445805	-	LCA5L	protein_coding	453.015	-2.11876	0.261424	-8.10468	5.28838e-16	1.6181e-14
ENSG00000169981	3	44648732	44660791	+	ZNF35	protein_coding	159.519	-2.10889	0.26031	-8.10144	5.43118e-16	1.65633e-14
ENSG00000221914	8	26291508	26372680	+	PPP2R2A	protein_coding	1684.08	1.10301	0.136147	8.10162	5.42322e-16	1.65633e-14
ENSG00000118515	6	134169246	134318112	-	SGK1	protein_coding	3905.01	-2.4376	0.301053	-8.0969	5.63762e-16	1.71646e-14
ENSG00000152926	7	64971772	65006684	-	ZNF117	protein_coding	801.611	-2.09782	0.259173	-8.09427	5.76078e-16	1.75109e-14
ENSG00000164615	5	134738548	134752157	+	CAMLG	protein_coding	431.687	1.60226	0.197974	8.09328	5.80812e-16	1.76259e-14
ENSG00000197062	6	28267010	28278224	+	ZSCAN26	protein_coding	170.506	-2.41945	0.299096	-8.08922	6.00462e-16	1.81924e-14
ENSG00000175832	17	43527844	43579620	-	ETV4	protein_coding	150.577	2.49677	0.308872	8.08349	6.29373e-16	1.90373e-14
ENSG00000120742	3	150541998	150603228	-	SERP1	protein_coding	2907.41	1.01221	0.125247	8.08177	6.38319e-16	1.92764e-14
ENSG00000164754	8	116845934	116874776	-	RAD21	protein_coding	1702.52	1.07424	0.132938	8.08077	6.43613e-16	1.94047e-14
ENSG00000126804	14	64503712	64533690	+	ZBTB1	protein_coding	805.982	-1.06031	0.131232	-8.07963	6.49658e-16	1.95551e-14
ENSG00000174405	13	108207439	108218368	-	LIG4	protein_coding	761.772	-1.25815	0.155819	-8.07448	6.77656e-16	2.03648e-14
ENSG00000139372	12	103965822	103988874	+	TDG	protein_coding	909.627	-1.43796	0.178119	-8.07301	6.85842e-16	2.05775e-14
ENSG00000137393	6	18387350	18468874	+	RNF144B	protein_coding	1193.4	-1.33367	0.165236	-8.07132	6.95426e-16	2.08313e-14
ENSG00000182827	1	226144679	226186741	-	ACBD3	protein_coding	2031	1.34249	0.166333	8.07111	6.96593e-16	2.08326e-14
ENSG00000096401	6	44387706	44450425	+	CDC5L	protein_coding	1671.89	-1.38958	0.172234	-8.068	7.14572e-16	2.13304e-14
ENSG00000177971	15	75639085	75648706	-	IMP3	protein_coding	216.173	-1.92526	0.238634	-8.06784	7.15538e-16	2.13304e-14
ENSG00000156381	14	102501767	102509799	-	ANKRD9	protein_coding	609.373	2.11014	0.261624	8.06555	7.29066e-16	2.16988e-14
ENSG00000180573	6	26124145	26139116	+	H2AC6	protein_coding	1952.27	-2.319	0.287548	-8.06474	7.33931e-16	2.18086e-14
ENSG00000104218	8	67062426	67196263	+	CSPP1	protein_coding	1582.99	-1.6766	0.208381	-8.04584	8.5657e-16	2.5412e-14
ENSG00000212916	1	232804892	232808407	+	MAP10	protein_coding	53.6819	-4.62901	0.575347	-8.04559	8.58326e-16	2.54234e-14
ENSG00000133315	11	63998558	64166113	-	MACROD1	protein_coding	218.222	2.01507	0.250504	8.04406	8.6908e-16	2.57009e-14
ENSG00000164185	5	122129546	122153569	+	ZNF474	protein_coding	522.001	-2.5187	0.31312	-8.04386	8.70538e-16	2.57031e-14
ENSG00000186130	9	122908056	122913323	-	ZBTB6	protein_coding	431.957	-1.82699	0.227172	-8.0423	8.81679e-16	2.59906e-14
ENSG00000134531	12	13196723	13219941	+	EMP1	protein_coding	2639.7	2.25364	0.280365	8.03823	9.11458e-16	2.68258e-14
ENSG00000260372	18	26655737	27190698	+	AQP4-AS1	lncRNA	235.224	-2.53167	0.315244	-8.0308	9.68356e-16	2.84552e-14
ENSG00000198876	9	34086387	34127399	-	DCAF12	protein_coding	1350.35	1.18116	0.147175	8.02555	1.01074e-15	2.96538e-14
ENSG00000165115	9	83834099	83921465	-	KIF27	protein_coding	969.733	-1.36848	0.170715	-8.01618	1.09089e-15	3.19546e-14
ENSG00000159128	21	33402896	33479348	+	IFNGR2	protein_coding	1407.18	1.76503	0.220306	8.01173	1.13102e-15	3.3078e-14
ENSG00000131043	20	36236459	36270918	+	AAR2	protein_coding	605.205	-1.36174	0.170096	-8.00568	1.18808e-15	3.46919e-14
ENSG00000149930	16	29973868	29992261	+	TAOK2	protein_coding	451.768	-2.0079	0.250828	-8.00508	1.19385e-15	3.48056e-14
ENSG00000178741	15	74919791	74938083	-	COX5A	protein_coding	1016.48	1.84373	0.230466	8.00003	1.24386e-15	3.62068e-14
ENSG00000121005	8	74984505	75034558	+	CRISPLD1	protein_coding	377.502	-2.18018	0.272585	-7.99814	1.26312e-15	3.67097e-14
ENSG00000122952	10	56357227	56361273	-	ZWINT	protein_coding	223.634	-3.9168	0.489758	-7.99741	1.27062e-15	3.68699e-14
ENSG00000184564	13	85792790	85806683	-	SLITRK6	protein_coding	1087.98	-2.82761	0.353578	-7.99714	1.27338e-15	3.68923e-14
ENSG00000138764	4	77157207	77433388	+	CCNG2	protein_coding	1175.23	1.76222	0.22049	7.99231	1.32429e-15	3.83072e-14
ENSG00000120063	17	65009289	65056740	-	GNA13	protein_coding	1565.42	1.19222	0.149196	7.991	1.33852e-15	3.86585e-14
ENSG00000196152	9	127424374	127445372	+	ZNF79	protein_coding	54.5106	-3.39837	0.425463	-7.98747	1.3774e-15	3.97195e-14
ENSG00000215068	5	43041575	43054603	+	AC025171.2	lncRNA	172.136	-2.14447	0.268727	-7.98012	1.46192e-15	4.20916e-14
ENSG00000124217	20	50958818	50963929	+	MOCS3	protein_coding	154.235	-1.79523	0.225021	-7.97805	1.48659e-15	4.27355e-14
ENSG00000179833	2	64631621	64751005	-	SERTAD2	protein_coding	687.693	1.69842	0.213166	7.96756	1.61843e-15	4.64534e-14
ENSG00000100100	22	31281594	31292534	-	PIK3IP1	protein_coding	1440.36	1.51585	0.190265	7.96704	1.6252e-15	4.65757e-14
ENSG00000105329	19	41301587	41353922	-	TGFB1	protein_coding	910.568	4.2299	0.530982	7.96619	1.63645e-15	4.68257e-14
ENSG00000158467	7	129225023	129430211	+	AHCYL2	protein_coding	1209.68	1.1103	0.139435	7.96289	1.68062e-15	4.80154e-14
ENSG00000241127	7	39566385	39610320	+	YAE1	protein_coding	159.576	-2.85406	0.358455	-7.96212	1.69123e-15	4.82441e-14
ENSG00000169174	1	55039447	55064852	+	PCSK9	protein_coding	175.409	3.20517	0.40282	7.95681	1.7653e-15	5.028e-14
ENSG00000132170	3	12287368	12434356	+	PPARG	protein_coding	279.182	2.63942	0.331832	7.95407	1.80475e-15	5.13247e-14
ENSG00000188868	19	12317477	12333720	-	ZNF563	protein_coding	82.9768	-2.73886	0.344434	-7.95177	1.83867e-15	5.22093e-14
ENSG00000115514	2	99318982	99340702	-	TXNDC9	protein_coding	653.847	-1.65281	0.20787	-7.9512	1.84721e-15	5.23714e-14
ENSG00000196268	19	21397119	21427573	+	ZNF493	protein_coding	312.28	-1.96549	0.247377	-7.94532	1.93689e-15	5.48301e-14
ENSG00000173575	15	92900189	93027996	+	CHD2	protein_coding	2598.9	1.13957	0.143775	7.92604	2.26254e-15	6.39511e-14
ENSG00000119396	9	121178133	121223014	-	RAB14	protein_coding	2524.89	1.05276	0.132911	7.92082	2.35955e-15	6.65918e-14
ENSG00000228634	1	31933020	31933975	+	AL136115.1	lncRNA	50.5691	4.52622	0.571557	7.91911	2.39212e-15	6.74083e-14
ENSG00000128274	22	42692121	42721298	-	A4GALT	protein_coding	1750.85	1.76546	0.222958	7.91838	2.40616e-15	6.76328e-14
ENSG00000197753	6	35797206	35845397	+	LHFPL5	protein_coding	83.1519	2.51223	0.317268	7.91832	2.40738e-15	6.76328e-14
ENSG00000179094	17	8140472	8156506	-	PER1	protein_coding	925.293	2.25125	0.284672	7.90823	2.61071e-15	7.32343e-14
ENSG00000067064	10	1039152	1049170	-	IDI1	protein_coding	5118.38	2.4646	0.311725	7.90633	2.65086e-15	7.42482e-14
ENSG00000164142	4	151409176	151670503	+	FAM160A1	protein_coding	553.906	1.46352	0.185179	7.90329	2.71632e-15	7.59668e-14
ENSG00000185591	12	53380176	53416446	+	SP1	protein_coding	3071.99	1.13998	0.144261	7.90219	2.74056e-15	7.65292e-14
ENSG00000132801	20	45857614	45879122	+	ZSWIM3	protein_coding	67.9697	-5.77288	0.730627	-7.90127	2.76067e-15	7.68594e-14
ENSG00000167617	19	54465026	54473296	-	CDC42EP5	protein_coding	628.389	2.34808	0.297177	7.90131	2.75992e-15	7.68594e-14
ENSG00000146701	7	76048051	76067508	+	MDH2	protein_coding	2739.63	1.32145	0.167271	7.90005	2.78783e-15	7.74993e-14
ENSG00000168661	19	34926903	34945170	+	ZNF30	protein_coding	61.2907	-3.57708	0.452973	-7.8969	2.85921e-15	7.93644e-14
ENSG00000115884	2	20200797	20225433	-	SDC1	protein_coding	13975.2	2.48102	0.314279	7.89431	2.91916e-15	8.09073e-14
ENSG00000117595	1	209785617	209806175	-	IRF6	protein_coding	5538.12	1.23168	0.156218	7.88438	3.16111e-15	8.74826e-14
ENSG00000006432	14	70722526	70809534	-	MAP3K9	protein_coding	872.375	1.88657	0.239344	7.88224	3.21567e-15	8.88598e-14
ENSG00000119684	14	75013764	75051532	-	MLH3	protein_coding	324.2	-2.38099	0.3021	-7.88146	3.23583e-15	8.92839e-14
ENSG00000175591	11	73218298	73236352	+	P2RY2	protein_coding	591.404	1.80625	0.229251	7.87889	3.30311e-15	9.10049e-14
ENSG00000132646	20	5114953	5126626	-	PCNA	protein_coding	1324.17	-1.82863	0.232181	-7.87587	3.38368e-15	9.30865e-14
ENSG00000160818	1	156594487	156601496	-	GPATCH4	protein_coding	339.556	-1.62337	0.206195	-7.873	3.46237e-15	9.51101e-14
ENSG00000111540	12	55973913	55996683	+	RAB5B	protein_coding	3482.32	1.25249	0.159096	7.87252	3.47573e-15	9.53357e-14
ENSG00000276234	17	37406886	37479725	+	TADA2A	protein_coding	295.401	-1.79864	0.228632	-7.867	3.63248e-15	9.9488e-14
ENSG00000158517	7	74773962	74789376	+	NCF1	protein_coding	93.1136	4.32353	0.549868	7.86285	3.7548e-15	1.02687e-13
ENSG00000120925	8	42849637	42897290	-	RNF170	protein_coding	427.553	-1.49788	0.19055	-7.86082	3.81627e-15	1.04214e-13
ENSG00000224689	19	9689924	9700776	-	ZNF812P	transcribed_unprocessed_pseudogene	410.622	-3.46954	0.441402	-7.86028	3.83262e-15	1.04506e-13
ENSG00000167447	17	59209400	59215247	+	SMG8	protein_coding	242.88	-2.3969	0.304988	-7.85901	3.87196e-15	1.05424e-13
ENSG00000156515	10	69269984	69401884	+	HK1	protein_coding	1812.3	2.21622	0.282072	7.85694	3.93633e-15	1.0702e-13
ENSG00000140749	16	21639550	21652608	-	IGSF6	protein_coding	71.3583	3.40818	0.433902	7.85472	4.0067e-15	1.08773e-13
ENSG00000267430	18	63415317	63416469	-	AC036176.2	processed_pseudogene	54.2083	3.58991	0.457278	7.8506	4.14051e-15	1.12242e-13
ENSG00000055044	2	202265736	202303661	+	NOP58	protein_coding	916.271	-1.83392	0.233682	-7.84794	4.22918e-15	1.14478e-13
ENSG00000198700	1	201829149	201884291	+	IPO9	protein_coding	702.628	-1.05875	0.134958	-7.84503	4.32839e-15	1.16993e-13
ENSG00000164626	6	39188971	39229475	-	KCNK5	protein_coding	171.969	2.84653	0.362874	7.84441	4.3498e-15	1.174e-13
ENSG00000182141	19	21291160	21329425	-	ZNF708	protein_coding	234.607	-2.68574	0.342428	-7.84323	4.39113e-15	1.18172e-13
ENSG00000184979	22	18150170	18177397	+	USP18	protein_coding	335.61	-3.07367	0.391883	-7.84333	4.38752e-15	1.18172e-13
ENSG00000106615	7	151466012	151520120	-	RHEB	protein_coding	1111.38	1.29892	0.165616	7.84294	4.40131e-15	1.18274e-13
ENSG00000183431	1	37956975	37990075	-	SF3A3	protein_coding	1109.79	-1.45348	0.185356	-7.84158	4.44922e-15	1.19388e-13
ENSG00000147155	X	48521799	48528716	+	EBP	protein_coding	340.051	1.88422	0.240301	7.84109	4.46646e-15	1.19678e-13
ENSG00000044574	9	125234853	125241343	-	HSPA5	protein_coding	11763.3	1.23393	0.157397	7.83959	4.52019e-15	1.20769e-13
ENSG00000173020	11	67266473	67286556	+	GRK2	protein_coding	1133	1.77339	0.22621	7.8396	4.52e-15	1.20769e-13
ENSG00000095002	2	47403067	47663146	+	MSH2	protein_coding	592.876	-1.27041	0.162067	-7.83879	4.54907e-15	1.21331e-13
ENSG00000251537	17	15571491	15651653	-	AC005324.3	protein_coding	33.7633	-7.87717	1.00491	-7.83865	4.55432e-15	1.21331e-13
ENSG00000100578	14	58427385	58551297	+	KIAA0586	protein_coding	469.715	-1.47487	0.188169	-7.83799	4.57798e-15	1.21786e-13
ENSG00000100722	14	88562970	88627596	+	ZC3H14	protein_coding	1582.07	-1.42462	0.181775	-7.83727	4.60432e-15	1.22311e-13
ENSG00000166012	11	93729948	93784391	-	TAF1D	protein_coding	1411.18	1.47267	0.18793	7.83626	4.64165e-15	1.23127e-13
ENSG00000148498	10	34109560	34815325	-	PARD3	protein_coding	1421.84	1.3972	0.178308	7.83585	4.65671e-15	1.2335e-13
ENSG00000125772	20	5544439	5611006	-	GPCPD1	protein_coding	3727.65	1.40871	0.179782	7.83566	4.66403e-15	1.23367e-13
ENSG00000128408	22	45413693	45432509	+	RIBC2	protein_coding	786.842	-1.91036	0.243907	-7.83233	4.78919e-15	1.26438e-13
ENSG00000166526	7	100064033	100082548	-	ZNF3	protein_coding	810.685	-1.15975	0.148074	-7.83221	4.79375e-15	1.26438e-13
ENSG00000006704	7	74453790	74602604	+	GTF2IRD1	protein_coding	632.873	1.73663	0.221781	7.83036	4.86461e-15	1.28124e-13
ENSG00000170421	12	52897187	52949954	-	KRT8	protein_coding	14885.2	1.40176	0.179038	7.82943	4.90083e-15	1.28895e-13
ENSG00000135205	7	77122434	77329533	+	CCDC146	protein_coding	3957.13	-1.47823	0.18912	-7.81636	5.43732e-15	1.42803e-13
ENSG00000185950	13	109752695	109786583	-	IRS2	protein_coding	502.028	3.21586	0.412364	7.79859	6.26011e-15	1.6418e-13
ENSG00000263465	11	95067197	95071224	+	SRSF8	protein_coding	662.85	-1.26877	0.162757	-7.79545	6.41771e-15	1.68075e-13
ENSG00000081386	9	96755865	96778129	-	ZNF510	protein_coding	274.79	-2.31275	0.296773	-7.793	6.54379e-15	1.70973e-13
ENSG00000115827	2	171434217	171485052	+	DCAF17	protein_coding	394.455	-1.40465	0.180246	-7.79294	6.54682e-15	1.70973e-13
ENSG00000248905	15	32765544	33194714	-	FMN1	protein_coding	352.197	-1.44494	0.185508	-7.78913	6.74742e-15	1.75964e-13
ENSG00000196428	3	150408335	150466431	+	TSC22D2	protein_coding	463.475	2.16955	0.278615	7.78691	6.86675e-15	1.78825e-13
ENSG00000197935	6	28994785	29005316	-	ZNF311	protein_coding	55.3976	-4.21079	0.541153	-7.78115	7.18671e-15	1.86895e-13
ENSG00000185220	1	248906196	248919946	+	PGBD2	protein_coding	115.111	-2.49417	0.320549	-7.78094	7.19868e-15	1.86944e-13
ENSG00000035664	15	63907036	64072033	-	DAPK2	protein_coding	196.135	2.03131	0.261368	7.77183	7.73622e-15	2.00622e-13
ENSG00000168386	3	99830141	100114513	-	FILIP1L	protein_coding	35.2838	-8.03346	1.03383	-7.7706	7.81172e-15	2.02297e-13
ENSG00000196659	2	177548998	177552796	-	TTC30B	protein_coding	429.174	-1.94811	0.250806	-7.7674	8.01111e-15	2.07172e-13
ENSG00000008323	12	6310436	6328506	+	PLEKHG6	protein_coding	425.875	1.39595	0.179879	7.76047	8.46174e-15	2.1852e-13
ENSG00000120910	8	22440819	22541142	+	PPP3CC	protein_coding	470.478	1.76564	0.227621	7.75693	8.70107e-15	2.24388e-13
ENSG00000139531	12	55997180	56006641	+	SUOX	protein_coding	463.987	-1.61199	0.207823	-7.75655	8.72712e-15	2.24748e-13
ENSG00000083099	6	89568144	89638749	-	LYRM2	protein_coding	516.117	-1.62972	0.210333	-7.74828	9.31427e-15	2.39536e-13
ENSG00000165660	10	124801819	124836667	+	ABRAXAS2	protein_coding	635.112	-1.73257	0.223616	-7.748	9.335e-15	2.39736e-13
ENSG00000164049	3	48372219	48401259	+	FBXW12	protein_coding	30.1061	-7.66006	0.990021	-7.73727	1.01574e-14	2.60497e-13
ENSG00000023909	1	93885199	93909456	-	GCLM	protein_coding	2099.63	1.46545	0.189536	7.73179	1.06041e-14	2.71577e-13
ENSG00000102882	16	30114105	30123506	-	MAPK3	protein_coding	1509.79	1.47168	0.19042	7.72861	1.08728e-14	2.78073e-13
ENSG00000032219	14	58298504	58373887	+	ARID4A	protein_coding	434.185	-1.59276	0.206112	-7.72765	1.09551e-14	2.79794e-13
ENSG00000181467	3	153162226	153170627	+	RAP2B	protein_coding	876.973	2.14526	0.277641	7.72675	1.10329e-14	2.81392e-13
ENSG00000235173	8	144137774	144140851	+	HGH1	protein_coding	136.178	-1.88035	0.243369	-7.72632	1.10701e-14	2.81953e-13
ENSG00000171617	5	74627406	74641424	-	ENC1	protein_coding	718.837	-2.97585	0.385207	-7.72533	1.11561e-14	2.83754e-13
ENSG00000284977	9	117759455	117879988	+	AL160272.1	lncRNA	102.563	-4.9577	0.641878	-7.72375	1.12956e-14	2.86908e-13
ENSG00000143315	1	160024953	160031990	-	PIGM	protein_coding	158.289	-2.01105	0.26038	-7.72353	1.13149e-14	2.87006e-13
ENSG00000168884	4	2741648	2756342	-	TNIP2	protein_coding	394.377	1.73221	0.224345	7.72117	1.15265e-14	2.91973e-13
ENSG00000076864	1	21596215	21669363	-	RAP1GAP	protein_coding	143.094	2.91936	0.378133	7.72046	1.1591e-14	2.93206e-13
ENSG00000154217	17	67377281	67697261	+	PITPNC1	protein_coding	253.463	1.91898	0.248713	7.71564	1.20379e-14	3.04095e-13
ENSG00000204789	6	27357825	27360221	-	ZNF204P	processed_pseudogene	700.758	-1.51848	0.196815	-7.71526	1.20732e-14	3.04572e-13
ENSG00000077312	19	40750637	40765389	+	SNRPA	protein_coding	319.244	1.58087	0.205036	7.71023	1.25591e-14	3.1597e-13
ENSG00000269837	19	23255053	23257939	-	IPO5P1	transcribed_processed_pseudogene	69.6344	-3.02921	0.392875	-7.71037	1.25455e-14	3.1597e-13
ENSG00000037749	5	154038906	154220478	+	MFAP3	protein_coding	490.925	-1.70646	0.221458	-7.70557	1.30265e-14	3.27286e-13
ENSG00000069956	15	51952106	52067375	+	MAPK6	protein_coding	6695.69	1.26096	0.163656	7.70496	1.3088e-14	3.27944e-13
ENSG00000173230	3	121663199	121749767	-	GOLGB1	protein_coding	5606.08	-1.37091	0.177922	-7.70509	1.30753e-14	3.27944e-13
ENSG00000141504	17	7626234	7627876	-	SAT2	protein_coding	532.542	1.49779	0.194417	7.70402	1.31854e-14	3.29938e-13
ENSG00000197714	19	57280051	57294069	+	ZNF460	protein_coding	245.042	1.78911	0.232369	7.69943	1.36675e-14	3.4154e-13
ENSG00000040275	5	169583636	169604778	+	SPDL1	protein_coding	270.866	-2.62944	0.341586	-7.69773	1.385e-14	3.45635e-13
ENSG00000172992	17	45023340	45061109	-	DCAKD	protein_coding	582.032	1.62459	0.211099	7.69586	1.4054e-14	3.50255e-13
ENSG00000142634	1	15409888	15430339	+	EFHD2	protein_coding	1464.18	2.40813	0.313004	7.69362	1.43032e-14	3.55987e-13
ENSG00000243710	1	43172149	43254358	+	CFAP57	protein_coding	1121.63	-1.61173	0.209557	-7.69111	1.45861e-14	3.6254e-13
ENSG00000286912	7	150234194	150237608	-	AC006008.1	lncRNA	45.0764	-4.96856	0.646125	-7.68979	1.47378e-14	3.65822e-13
ENSG00000065833	6	83210402	83431051	-	ME1	protein_coding	872.37	1.6662	0.216733	7.68782	1.4966e-14	3.7099e-13
ENSG00000165272	9	33441156	33447596	-	AQP3	protein_coding	9765.34	2.32308	0.302239	7.68624	1.51524e-14	3.75107e-13
ENSG00000135926	2	218274197	218292586	-	TMBIM1	protein_coding	4418.59	2.70809	0.352415	7.68438	1.53745e-14	3.80099e-13
ENSG00000123607	2	165857475	165953816	-	TTC21B	protein_coding	897.793	-1.36717	0.178016	-7.68005	1.59027e-14	3.92635e-13
ENSG00000286042	6	79307669	79313384	-	LCAL1	lncRNA	28.3461	-7.91562	1.03162	-7.67297	1.68055e-14	4.14371e-13
ENSG00000256229	19	20167214	20200488	+	ZNF486	protein_coding	193.774	-2.24544	0.292667	-7.67236	1.68865e-14	4.15816e-13
ENSG00000223960	2	178413635	178440243	+	CHROMR	lncRNA	127.014	-2.71005	0.353354	-7.66949	1.72688e-14	4.24666e-13
ENSG00000108592	17	63819433	63830012	-	FTSJ3	protein_coding	567.551	-1.29904	0.169464	-7.66558	1.78029e-14	4.3722e-13
ENSG00000169288	4	77862830	77952785	+	MRPL1	protein_coding	368.91	-2.36835	0.30913	-7.66133	1.84019e-14	4.51333e-13
ENSG00000070718	8	42152946	42171673	+	AP3M2	protein_coding	729.81	-1.41	0.184072	-7.66005	1.85857e-14	4.5524e-13
ENSG00000101224	20	3786772	3806121	+	CDC25B	protein_coding	329.823	1.99224	0.260245	7.65525	1.92939e-14	4.71963e-13
ENSG00000163818	3	45823316	45916042	-	LZTFL1	protein_coding	2368.23	-1.50611	0.196813	-7.65253	1.97067e-14	4.81424e-13
ENSG00000187134	10	4963253	4983283	+	AKR1C1	protein_coding	4455.22	2.38772	0.312056	7.65156	1.98551e-14	4.84412e-13
ENSG00000181007	19	36383120	36418644	-	ZFP82	protein_coding	78.6441	-2.98253	0.38995	-7.6485	2.03337e-14	4.95437e-13
ENSG00000112972	5	43287470	43313512	-	HMGCS1	protein_coding	5124.31	2.36805	0.309664	7.64717	2.05445e-14	4.99916e-13
ENSG00000104976	19	7920338	7923250	+	SNAPC2	protein_coding	118.296	2.68496	0.351268	7.64361	2.11212e-14	5.12605e-13
ENSG00000128923	15	58771192	58861900	+	MINDY2	protein_coding	677.011	1.57885	0.206555	7.64373	2.11018e-14	5.12605e-13
ENSG00000111785	12	106774621	106889316	+	RIC8B	protein_coding	178.033	-1.87251	0.245049	-7.64139	2.14885e-14	5.20836e-13
ENSG00000119922	10	89283694	89309271	+	IFIT2	protein_coding	2859.71	-5.84353	0.764744	-7.64116	2.15271e-14	5.2109e-13
ENSG00000104419	8	133237171	133302022	-	NDRG1	protein_coding	5828.88	2.69075	0.352321	7.6372	2.22005e-14	5.36691e-13
ENSG00000185000	8	144314584	144326910	-	DGAT1	protein_coding	441.345	1.50619	0.197357	7.63183	2.31447e-14	5.58787e-13
ENSG00000111845	6	10694972	10709782	+	PAK1IP1	protein_coding	326.038	-1.88051	0.246426	-7.63115	2.32672e-14	5.61014e-13
ENSG00000246067	11	83072052	83107789	+	RAB30-DT	lncRNA	113.053	-3.61641	0.474161	-7.62695	2.40369e-14	5.7882e-13
ENSG00000085831	1	51287258	51345116	-	TTC39A	protein_coding	416.41	1.71108	0.224416	7.62461	2.44772e-14	5.88659e-13
ENSG00000197111	12	53452102	53481162	+	PCBP2	protein_coding	1061.3	1.12448	0.147565	7.62021	2.53269e-14	6.08305e-13
ENSG00000133114	13	44989529	45037669	+	GPALPP1	protein_coding	514.406	-1.63711	0.214845	-7.61997	2.53729e-14	6.08621e-13
ENSG00000141076	16	69131291	69231130	+	UTP4	protein_coding	557.347	-1.70558	0.223843	-7.61953	2.54602e-14	6.09926e-13
ENSG00000054598	6	1609915	1613897	+	FOXC1	protein_coding	1356.69	1.71998	0.2258	7.61727	2.59106e-14	6.19916e-13
ENSG00000080031	19	55181247	55209506	-	PTPRH	protein_coding	298.269	2.42162	0.318023	7.6146	2.6451e-14	6.32028e-13
ENSG00000022840	12	120533480	120577588	+	RNF10	protein_coding	1464.41	1.8314	0.24055	7.61338	2.67012e-14	6.37187e-13
ENSG00000280162	20	1320710	1324367	+	AL136531.3	TEC	59.1763	3.84577	0.505464	7.6084	2.7752e-14	6.61411e-13
ENSG00000166164	16	50313487	50368934	-	BRD7	protein_coding	1157.8	0.895814	0.11776	7.60712	2.80268e-14	6.67102e-13
ENSG00000047457	3	149162410	149221829	-	CP	protein_coding	8126.72	-1.84476	0.242557	-7.60546	2.83893e-14	6.74865e-13
ENSG00000182107	14	61277370	61281761	-	TMEM30B	protein_coding	993.532	1.99036	0.261837	7.60155	2.92613e-14	6.94703e-13
ENSG00000186666	12	49836043	49843106	-	BCDIN3D	protein_coding	49.8255	-3.62624	0.477072	-7.60104	2.93752e-14	6.96514e-13
ENSG00000118407	6	75291859	75493800	-	FILIP1	protein_coding	157.459	-3.11976	0.410497	-7.59996	2.96231e-14	7.01495e-13
ENSG00000163395	1	201190824	201228952	+	IGFN1	protein_coding	149.25	9.43544	1.24165	7.59912	2.98145e-14	7.05129e-13
ENSG00000272374	6	35220370	35224630	-	Z97832.2	lncRNA	34.2662	-7.78779	1.02507	-7.5973	3.02366e-14	7.14201e-13
ENSG00000012660	6	53267398	53349179	-	ELOVL5	protein_coding	3741.23	1.58688	0.20894	7.59489	3.08054e-14	7.26709e-13
ENSG00000102034	X	130064874	130110716	-	ELF4	protein_coding	285.796	2.29642	0.302529	7.59072	3.18141e-14	7.49552e-13
ENSG00000165178	7	75156639	75172044	-	NCF1C	unprocessed_pseudogene	48.5615	5.13219	0.676391	7.5876	3.25884e-14	7.6682e-13
ENSG00000156239	21	28872191	28885371	-	N6AMT1	protein_coding	356.1	-1.84848	0.243641	-7.58687	3.2772e-14	7.70164e-13
ENSG00000163660	3	157146508	157160760	-	CCNL1	protein_coding	6061.66	1.70899	0.225284	7.58595	3.30057e-14	7.74673e-13
ENSG00000213742	20	25624045	25689032	+	ZNF337-AS1	lncRNA	54.3558	-3.73632	0.492829	-7.58137	3.41912e-14	8.01483e-13
ENSG00000170629	7	103175133	103280410	-	DPY19L2P2	transcribed_unprocessed_pseudogene	314.535	-2.07689	0.274166	-7.57529	3.58338e-14	8.38926e-13
ENSG00000117410	1	43974487	43978295	+	ATP6V0B	protein_coding	1735.84	1.35243	0.178686	7.56874	3.76866e-14	8.81192e-13
ENSG00000185261	5	94152966	94618597	-	KIAA0825	protein_coding	311.274	-1.9719	0.260674	-7.5646	3.89059e-14	9.07976e-13
ENSG00000204947	7	149102784	149126324	-	ZNF425	protein_coding	53.9364	-4.9907	0.659751	-7.56452	3.89301e-14	9.07976e-13
ENSG00000161960	17	7572706	7579006	+	EIF4A1	protein_coding	124.602	2.33885	0.309206	7.56407	3.90653e-14	9.09237e-13
ENSG00000238113	9	62801461	62813486	+	LINC01410	lncRNA	86.1894	-3.71006	0.490488	-7.56401	3.90822e-14	9.09237e-13
ENSG00000092068	14	23125295	23183674	-	SLC7A8	protein_coding	233.985	2.94431	0.389331	7.5625	3.95394e-14	9.1872e-13
ENSG00000179813	13	42781550	42791549	+	FAM216B	protein_coding	5922.69	-1.34128	0.17738	-7.56161	3.98098e-14	9.23846e-13
ENSG00000137309	6	34236873	34246231	+	HMGA1	protein_coding	2412.85	2.80579	0.37124	7.55787	4.09721e-14	9.4963e-13
ENSG00000185515	X	155071420	155123074	+	BRCC3	protein_coding	506.026	-1.56	0.206522	-7.5537	4.23049e-14	9.79298e-13
ENSG00000260565	16	2660348	2682379	-	ERVK13-1	lncRNA	440.228	-1.80255	0.238755	-7.54979	4.35946e-14	1.00789e-12
ENSG00000171103	2	28849821	28870309	-	TRMT61B	protein_coding	195.647	-1.93116	0.25586	-7.54771	4.42995e-14	1.02292e-12
ENSG00000135070	9	86264546	86283102	-	ISCA1	protein_coding	737.984	-1.17816	0.156126	-7.54624	4.48011e-14	1.03321e-12
ENSG00000103275	16	1308880	1327018	+	UBE2I	protein_coding	602.931	1.61729	0.214357	7.54484	4.52834e-14	1.04304e-12
ENSG00000132388	17	4269259	4366628	-	UBE2G1	protein_coding	822.271	1.35709	0.180005	7.53918	4.72929e-14	1.08797e-12
ENSG00000118412	6	89829894	89874436	+	CASP8AP2	protein_coding	403.592	-1.67138	0.221774	-7.53642	4.83055e-14	1.10989e-12
ENSG00000165312	10	23439458	23442390	+	OTUD1	protein_coding	310.338	1.98214	0.263055	7.53507	4.88082e-14	1.12005e-12
ENSG00000197603	5	37106228	37249428	-	CPLANE1	protein_coding	1851.7	-1.66117	0.22057	-7.53126	5.02519e-14	1.15176e-12
ENSG00000186409	1	42463221	42657190	+	CCDC30	protein_coding	733.85	-1.73621	0.230759	-7.52389	5.31696e-14	1.21712e-12
ENSG00000223768	21	45288050	45297806	+	LINC00205	lncRNA	130.979	-2.60024	0.34562	-7.5234	5.33717e-14	1.22024e-12
ENSG00000146197	6	35213956	35253079	+	SCUBE3	protein_coding	55.0463	-4.94171	0.656897	-7.52281	5.36112e-14	1.22421e-12
ENSG00000010072	1	231337104	231355023	+	SPRTN	protein_coding	416.549	-1.67495	0.222661	-7.52245	5.3761e-14	1.22612e-12
ENSG00000089177	20	16272104	16573434	-	KIF16B	protein_coding	492.194	1.25979	0.167482	7.52196	5.39631e-14	1.22771e-12
ENSG00000117479	1	169463909	169485944	-	SLC19A2	protein_coding	595.432	1.52957	0.203345	7.52205	5.39256e-14	1.22771e-12
ENSG00000148848	10	126012381	126388455	-	ADAM12	protein_coding	63.1615	-5.3092	0.70588	-7.5214	5.41946e-14	1.23147e-12
ENSG00000138668	4	82352498	82374503	-	HNRNPD	protein_coding	1436.85	1.2108	0.160988	7.52102	5.43493e-14	1.23347e-12
ENSG00000068323	X	49028726	49043410	-	TFE3	protein_coding	515.395	1.9004	0.252701	7.52038	5.46162e-14	1.23801e-12
ENSG00000124275	5	7851186	7906025	+	MTRR	protein_coding	731.752	-1.64978	0.219405	-7.51935	5.5049e-14	1.2463e-12
ENSG00000106299	7	123681943	123749003	-	WASL	protein_coding	1488.29	1.8553	0.246815	7.51698	5.60555e-14	1.26754e-12
ENSG00000263072	16	3100696	3143734	-	ZNF213-AS1	lncRNA	99.0371	-2.44262	0.325016	-7.5154	5.67365e-14	1.28137e-12
ENSG00000132530	17	6755447	6775647	+	XAF1	protein_coding	359.314	-3.45039	0.459193	-7.51403	5.73327e-14	1.29326e-12
ENSG00000115484	2	61868085	61888671	-	CCT4	protein_coding	1257.55	1.05798	0.140815	7.51324	5.76799e-14	1.29951e-12
ENSG00000057657	6	105993463	106109939	+	PRDM1	protein_coding	288.18	2.42016	0.322181	7.51181	5.83143e-14	1.31221e-12
ENSG00000232040	6	28570535	28616212	-	ZBED9	protein_coding	140.064	-2.94135	0.39162	-7.51073	5.87999e-14	1.32154e-12
ENSG00000099942	22	20917407	20953747	+	CRKL	protein_coding	897.37	1.80344	0.240128	7.51031	5.89898e-14	1.3242e-12
ENSG00000187790	14	45135930	45200890	+	FANCM	protein_coding	151.633	-2.33675	0.311272	-7.5071	6.0451e-14	1.35536e-12
ENSG00000185100	14	104724186	104747325	+	ADSS1	protein_coding	545.141	2.52623	0.336582	7.50555	6.11691e-14	1.3698e-12
ENSG00000089195	20	5937228	5950558	-	TRMT6	protein_coding	289.321	-1.64785	0.219583	-7.50449	6.16696e-14	1.37935e-12
ENSG00000186376	X	135248920	135344109	-	ZNF75D	protein_coding	283.377	-1.2919	0.172163	-7.50393	6.19326e-14	1.38353e-12
ENSG00000187510	12	92702843	92772455	+	PLEKHG7	protein_coding	791.865	-1.26561	0.168663	-7.50377	6.20061e-14	1.38353e-12
ENSG00000105171	19	29606283	29617237	+	POP4	protein_coding	623.588	-1.49842	0.199808	-7.49932	6.4149e-14	1.42963e-12
ENSG00000139132	12	32399529	32646050	+	FGD4	protein_coding	542.802	1.18472	0.158112	7.4929	6.73687e-14	1.49958e-12
ENSG00000170776	15	85380571	85749358	+	AKAP13	protein_coding	1333.58	1.13646	0.151731	7.48995	6.89016e-14	1.53186e-12
ENSG00000122861	10	73909177	73917496	+	PLAU	protein_coding	4308.8	3.72383	0.497638	7.48301	7.26373e-14	1.61298e-12
ENSG00000178726	20	23045633	23049672	-	THBD	protein_coding	521.582	3.08875	0.412925	7.48017	7.42286e-14	1.64635e-12
ENSG00000185262	17	76265348	76271298	+	UBALD2	protein_coding	1044.11	2.15486	0.288351	7.47303	7.83671e-14	1.73606e-12
ENSG00000180263	12	95076749	95217482	-	FGD6	protein_coding	680.615	1.26197	0.168876	7.47274	7.85404e-14	1.73782e-12
ENSG00000132823	20	44195939	44210771	-	OSER1	protein_coding	1300.97	1.61643	0.216397	7.46973	8.03595e-14	1.77596e-12
ENSG00000119138	9	70384597	70414624	-	KLF9	protein_coding	620.846	1.77444	0.237569	7.46917	8.07052e-14	1.78147e-12
ENSG00000129355	19	10566460	10569059	-	CDKN2D	protein_coding	186.653	2.87446	0.384944	7.46723	8.18986e-14	1.80567e-12
ENSG00000185869	19	36888124	36916291	-	ZNF829	protein_coding	66.0671	-2.80913	0.376284	-7.46546	8.3011e-14	1.82802e-12
ENSG00000138750	4	76114659	76148444	-	NUP54	protein_coding	669.272	-1.65525	0.221833	-7.4617	8.54159e-14	1.87874e-12
ENSG00000153292	6	46997708	47042350	-	ADGRF1	protein_coding	10864.6	-1.49009	0.199838	-7.45646	8.88792e-14	1.9526e-12
ENSG00000253522	5	160438594	160487426	+	MIR3142HG	lncRNA	24.4545	-7.87019	1.0563	-7.45071	9.28397e-14	2.0372e-12
ENSG00000133657	3	194402672	194498364	-	ATP13A3	protein_coding	2691.14	0.83962	0.112696	7.45031	9.31209e-14	2.04096e-12
ENSG00000280128	6	30282349	30286054	-	AL662795.2	TEC	161.971	-4.05183	0.543978	-7.44851	9.43995e-14	2.06654e-12
ENSG00000137574	8	55773446	55826445	+	TGS1	protein_coding	317.36	-1.88142	0.252675	-7.44598	9.62274e-14	2.10407e-12
ENSG00000181649	11	2928273	2929420	-	PHLDA2	protein_coding	1263.92	4.36656	0.586449	7.44576	9.63877e-14	2.10509e-12
ENSG00000170961	8	121612116	121641440	-	HAS2	protein_coding	180.837	-3.84281	0.516299	-7.44299	9.84322e-14	2.14721e-12
ENSG00000169641	1	23084023	23177808	-	LUZP1	protein_coding	757.151	-2.27535	0.306037	-7.43488	1.04664e-13	2.28048e-12
ENSG00000145439	4	168863770	169010275	-	CBR4	protein_coding	772.824	-1.06465	0.143205	-7.43446	1.04999e-13	2.28507e-12
ENSG00000231721	7	130938963	131110176	-	LINC-PINT	lncRNA	117.481	2.4199	0.32558	7.4326	1.06481e-13	2.31463e-12
ENSG00000108406	17	59565558	59608345	+	DHX40	protein_coding	2427.91	-1.40315	0.188823	-7.43104	1.07747e-13	2.33939e-12
ENSG00000079215	5	36606355	36688334	+	SLC1A3	protein_coding	305.647	-3.48969	0.469741	-7.42896	1.09452e-13	2.37364e-12
ENSG00000163814	3	45082277	45146422	-	CDCP1	protein_coding	1547.1	1.8218	0.245243	7.42854	1.09801e-13	2.37842e-12
ENSG00000099860	19	2476122	2478259	+	GADD45B	protein_coding	1051.84	2.36866	0.319355	7.41701	1.19792e-13	2.58879e-12
ENSG00000177946	16	89969773	89972832	-	CENPBD1	protein_coding	49.6545	-5.10564	0.688356	-7.41715	1.19666e-13	2.58879e-12
ENSG00000160752	1	155308748	155320666	+	FDPS	protein_coding	831.212	1.85909	0.250694	7.41574	1.20945e-13	2.61067e-12
ENSG00000068903	19	38878555	38899862	-	SIRT2	protein_coding	594.112	1.21983	0.164535	7.41381	1.2272e-13	2.64591e-12
ENSG00000166192	15	72114258	72143692	+	SENP8	protein_coding	90.7798	-3.20182	0.431899	-7.41335	1.23149e-13	2.65207e-12
ENSG00000068885	3	160256986	160399880	-	IFT80	protein_coding	890.514	-1.28769	0.173749	-7.41121	1.2515e-13	2.6906e-12
ENSG00000081014	15	50908672	51005895	+	AP4E1	protein_coding	261.035	-1.49808	0.202139	-7.41113	1.25228e-13	2.6906e-12
ENSG00000247950	4	109347475	109433817	-	SEC24B-AS1	lncRNA	24.6388	-7.64024	1.03106	-7.41007	1.26231e-13	2.709e-12
ENSG00000177058	5	55625845	55773194	-	SLC38A9	protein_coding	383.203	-1.7443	0.23549	-7.4071	1.29087e-13	2.76709e-12
ENSG00000165506	14	49625174	49635230	-	DNAAF2	protein_coding	406.237	-1.58294	0.213849	-7.40213	1.34018e-13	2.86947e-12
ENSG00000119401	9	116687302	116701300	+	TRIM32	protein_coding	390.814	-1.97132	0.266337	-7.4016	1.34549e-13	2.87753e-12
ENSG00000164002	1	40508741	40516556	+	EXO5	protein_coding	33.05	-4.94427	0.668231	-7.39904	1.37175e-13	2.93029e-12
ENSG00000066926	18	57544389	57586702	-	FECH	protein_coding	413.078	-1.10984	0.15008	-7.39495	1.41458e-13	3.01831e-12
ENSG00000139946	14	56117814	56301524	+	PELI2	protein_coding	252.193	2.09953	0.283939	7.39429	1.42166e-13	3.02993e-12
ENSG00000139233	12	66116555	66130750	-	LLPH	protein_coding	164.936	-2.37567	0.321473	-7.38995	1.46884e-13	3.12689e-12
ENSG00000132600	16	68310974	68358563	+	PRMT7	protein_coding	317.862	-1.604	0.217098	-7.38838	1.48629e-13	3.16041e-12
ENSG00000177613	10	51695486	51699595	-	CSTF2T	protein_coding	479.232	-1.28353	0.173758	-7.38691	1.50285e-13	3.19197e-12
ENSG00000083814	19	57719751	57727624	-	ZNF671	protein_coding	95.0929	-4.14334	0.56115	-7.38365	1.54007e-13	3.26728e-12
ENSG00000160336	19	53445001	53458261	+	ZNF761	protein_coding	151.381	-1.66884	0.22612	-7.38032	1.57906e-13	3.34616e-12
ENSG00000197837	12	14767999	14771131	-	H4-16	protein_coding	77.5266	-3.93216	0.53287	-7.3792	1.59245e-13	3.37068e-12
ENSG00000116514	1	32936445	32964685	-	RNF19B	protein_coding	835.411	2.09324	0.283829	7.37499	1.64352e-13	3.47482e-12
ENSG00000203734	6	138795911	138904070	+	ECT2L	protein_coding	1008.57	-1.95177	0.264734	-7.37258	1.67354e-13	3.53426e-12
ENSG00000112715	6	43770184	43786487	+	VEGFA	polymorphic_pseudogene	1774	1.94273	0.263622	7.36937	1.7144e-13	3.61644e-12
ENSG00000137965	1	78649796	78664078	+	IFI44	protein_coding	1294.41	-3.03695	0.412124	-7.36903	1.71874e-13	3.62146e-12
ENSG00000155761	1	117953590	118185228	-	SPAG17	protein_coding	4221.24	-1.38734	0.188344	-7.36595	1.75886e-13	3.70179e-12
ENSG00000146476	6	151452258	151470101	+	ARMT1	protein_coding	885.345	-1.34821	0.183072	-7.36438	1.77973e-13	3.74148e-12
ENSG00000140988	16	1962058	1964841	-	RPS2	protein_coding	12705.4	1.77213	0.240662	7.36354	1.79098e-13	3.76086e-12
ENSG00000111335	12	112978395	113011723	+	OAS2	protein_coding	3219.67	-2.64135	0.358733	-7.363	1.79821e-13	3.77176e-12
ENSG00000103356	16	23522016	23557731	-	EARS2	protein_coding	401.428	-1.18173	0.160556	-7.36022	1.83611e-13	3.84691e-12
ENSG00000244879	15	50354959	50372202	+	GABPB1-AS1	lncRNA	855.768	-1.87959	0.255472	-7.35733	1.8763e-13	3.92668e-12
ENSG00000160588	11	118226690	118252365	-	MPZL3	protein_coding	1580.47	1.20632	0.163969	7.35701	1.88073e-13	3.92837e-12
ENSG00000169248	4	76033682	76041415	-	CXCL11	protein_coding	268.01	-11.4374	1.55463	-7.35697	1.88135e-13	3.92837e-12
ENSG00000231057	1	211675749	211690103	+	AC096637.3	lncRNA	233.852	-2.55893	0.347845	-7.35652	1.88772e-13	3.93724e-12
ENSG00000171885	18	26852043	26865771	-	AQP4	polymorphic_pseudogene	203.41	1.85287	0.252078	7.35036	1.97669e-13	4.11818e-12
ENSG00000171408	6	135851701	136195574	+	PDE7B	protein_coding	52.1535	-2.68763	0.36569	-7.34947	1.98995e-13	4.14114e-12
ENSG00000079739	1	63593411	63660245	+	PGM1	protein_coding	519.962	1.35107	0.183854	7.34859	2.00309e-13	4.16383e-12
ENSG00000013392	6	83193357	83198935	+	RWDD2A	protein_coding	103.396	-2.38939	0.325186	-7.34778	2.01523e-13	4.18436e-12
ENSG00000130545	19	6463777	6467221	+	CRB3	protein_coding	331.953	1.50966	0.205468	7.34743	2.02057e-13	4.19077e-12
ENSG00000143457	1	150646230	150697154	-	GOLPH3L	protein_coding	1691.66	0.853398	0.116169	7.34615	2.03993e-13	4.22619e-12
ENSG00000180938	8	124973295	124979389	+	ZNF572	protein_coding	39.8122	-5.56157	0.757113	-7.34577	2.04586e-13	4.23373e-12
ENSG00000168710	1	109984765	110023742	+	AHCYL1	protein_coding	2482.21	1.41879	0.193175	7.34456	2.06437e-13	4.26728e-12
ENSG00000170385	1	211571568	211579161	-	SLC30A1	protein_coding	803.567	1.90157	0.258988	7.34229	2.09968e-13	4.33545e-12
ENSG00000259153	14	70809841	70815994	+	AC004816.1	lncRNA	254.502	2.21285	0.301455	7.34058	2.12678e-13	4.38651e-12
ENSG00000100650	14	69726900	69772005	+	SRSF5	protein_coding	5126.43	-1.28743	0.175394	-7.34018	2.13303e-13	4.39451e-12
ENSG00000198722	9	35161992	35405338	+	UNC13B	protein_coding	1523.66	1.12019	0.152628	7.33937	2.14594e-13	4.41621e-12
ENSG00000160051	1	32205661	32208687	+	IQCC	protein_coding	72.746	-3.5408	0.482623	-7.33657	2.19139e-13	4.50474e-12
ENSG00000200879	11	123058077	123058161	-	SNORD14E	snoRNA	45.2294	7.24922	0.988147	7.33618	2.1978e-13	4.51291e-12
ENSG00000168495	8	22245133	22254601	+	POLR3D	protein_coding	340.447	1.39205	0.189825	7.33334	2.24484e-13	4.60441e-12
ENSG00000101639	18	12991362	13125052	+	CEP192	protein_coding	1068.94	-1.41914	0.193526	-7.33307	2.24937e-13	4.60656e-12
ENSG00000198899	MT	8527	9207	+	MT-ATP6	protein_coding	54797.8	-1.37822	0.187948	-7.33298	2.25086e-13	4.60656e-12
ENSG00000149289	11	110093392	110171841	+	ZC3H12C	protein_coding	274.165	-1.59302	0.217467	-7.32537	2.38245e-13	4.8705e-12
ENSG00000261490	4	10068089	10073019	-	AC005674.2	lncRNA	27.2726	-7.50403	1.02462	-7.32375	2.41144e-13	4.92433e-12
ENSG00000196247	7	64666083	64711582	+	ZNF107	protein_coding	200.205	-3.03617	0.41465	-7.32224	2.43871e-13	4.97455e-12
ENSG00000134684	1	32775237	32818153	-	YARS1	protein_coding	1213.56	1.47338	0.201426	7.31475	2.57853e-13	5.25396e-12
ENSG00000164440	6	139240061	139291998	-	TXLNB	protein_coding	248.288	-1.67171	0.228621	-7.31214	2.62917e-13	5.35127e-12
ENSG00000178607	17	64039142	64130819	-	ERN1	protein_coding	271.276	1.97393	0.270262	7.30375	2.79865e-13	5.68997e-12
ENSG00000076604	17	28744005	28750956	+	TRAF4	protein_coding	1823.07	1.31764	0.180415	7.30341	2.80563e-13	5.69791e-12
ENSG00000157978	1	25543606	25568886	+	LDLRAP1	protein_coding	597.898	1.37916	0.188872	7.3021	2.83321e-13	5.74763e-12
ENSG00000158769	1	160995211	161021343	-	F11R	protein_coding	2044.98	1.43744	0.196888	7.30081	2.86043e-13	5.79652e-12
ENSG00000112419	6	143536845	143831185	+	PHACTR2	protein_coding	485.453	-1.69975	0.232861	-7.29943	2.88995e-13	5.84994e-12
ENSG00000243836	7	151409161	151413354	+	WDR86-AS1	lncRNA	886.072	-1.88333	0.258084	-7.29736	2.93461e-13	5.9298e-12
ENSG00000275678	1	67121605	67123956	-	AL133320.2	lncRNA	208.771	-1.98738	0.272345	-7.29731	2.9358e-13	5.9298e-12
ENSG00000128849	15	57375967	57550727	+	CGNL1	protein_coding	140.62	3.67628	0.503958	7.29482	2.99057e-13	6.03386e-12
ENSG00000119139	9	69121264	69274615	+	TJP2	protein_coding	236.498	2.02975	0.278257	7.29451	2.99739e-13	6.04104e-12
ENSG00000034713	16	75566375	75577881	+	GABARAPL2	protein_coding	1438.24	1.20897	0.165747	7.29406	3.00745e-13	6.05473e-12
ENSG00000256683	19	51964340	51986856	-	ZNF350	protein_coding	168.343	-2.47826	0.339946	-7.29014	3.0963e-13	6.22685e-12
ENSG00000155868	5	157137424	157159019	-	MED7	protein_coding	242.04	-1.46642	0.201318	-7.28411	3.23797e-13	6.50471e-12
ENSG00000175592	11	65892049	65900573	-	FOSL1	protein_coding	226.912	3.40331	0.467332	7.28243	3.27868e-13	6.57935e-12
ENSG00000169710	17	82078338	82098294	-	FASN	protein_coding	4550.11	2.81502	0.386613	7.28124	3.30767e-13	6.63037e-12
ENSG00000075618	7	5592816	5606655	+	FSCN1	protein_coding	1396.95	2.83146	0.388924	7.28025	3.33212e-13	6.66496e-12
ENSG00000131941	19	32978592	33064888	-	RHPN2	protein_coding	1135.85	1.86379	0.256002	7.28037	3.32897e-13	6.66496e-12
ENSG00000185909	3	49171598	49176486	+	KLHDC8B	protein_coding	307.999	1.40946	0.193666	7.27777	3.39373e-13	6.78088e-12
ENSG00000093144	6	127288712	127343609	-	ECHDC1	protein_coding	1947.56	-1.40564	0.193275	-7.27274	3.52264e-13	7.03087e-12
ENSG00000115993	2	201377207	201451500	-	TRAK2	protein_coding	1089.29	-1.54574	0.212545	-7.27252	3.52847e-13	7.03494e-12
ENSG00000225190	17	45435900	45490749	-	PLEKHM1	protein_coding	715.998	1.61945	0.222735	7.27073	3.57537e-13	7.12078e-12
ENSG00000158691	6	28378955	28399734	-	ZSCAN12	protein_coding	99.761	-2.676	0.3681	-7.26978	3.60064e-13	7.16342e-12
ENSG00000029363	6	136256627	136289851	-	BCLAF1	protein_coding	4535.14	-1.39536	0.192098	-7.26378	3.7641e-13	7.4806e-12
ENSG00000221869	8	47736913	47738164	-	CEBPD	protein_coding	1383.19	2.31057	0.318523	7.254	4.04654e-13	8.03329e-12
ENSG00000101439	20	23626706	23638473	-	CST3	protein_coding	4670.69	1.13937	0.157083	7.2533	4.06748e-13	8.06622e-12
ENSG00000078142	18	41955234	42087830	+	PIK3C3	protein_coding	1295.76	-1.25043	0.172447	-7.25113	4.13312e-13	8.18765e-12
ENSG00000212694	12	121795267	121803906	-	LINC01089	lncRNA	60.5329	-3.94507	0.5443	-7.24797	4.23054e-13	8.37169e-12
ENSG00000203880	20	64255695	64287821	+	PCMTD2	protein_coding	1012.19	-1.06092	0.146411	-7.24618	4.28689e-13	8.47414e-12
ENSG00000184860	16	81988855	82011481	-	SDR42E1	protein_coding	480.866	-1.75182	0.241772	-7.24574	4.30086e-13	8.49272e-12
ENSG00000175305	8	94879770	94896678	-	CCNE2	protein_coding	43.4169	-5.72983	0.790813	-7.24549	4.30876e-13	8.49926e-12
ENSG00000162994	2	55172547	55232563	-	CLHC1	protein_coding	449.097	-1.56659	0.21648	-7.23664	4.5993e-13	9.06273e-12
ENSG00000117407	1	43933320	43937240	+	ARTN	protein_coding	307.005	2.73728	0.378281	7.23609	4.61798e-13	9.08988e-12
ENSG00000166197	10	102152176	102163871	+	NOLC1	protein_coding	1687.98	-1.25844	0.17392	-7.23576	4.62918e-13	9.10225e-12
ENSG00000132274	11	5689697	5737089	+	TRIM22	protein_coding	4915.46	-1.87667	0.259393	-7.23486	4.65996e-13	9.15307e-12
ENSG00000172548	5	157460019	157474717	+	NIPAL4	protein_coding	143.374	3.77167	0.521436	7.23323	4.71639e-13	9.2541e-12
ENSG00000167792	11	67605653	67612554	+	NDUFV1	protein_coding	1323.7	1.23132	0.170342	7.22851	4.8833e-13	9.57147e-12
ENSG00000049860	5	74640023	74722647	+	HEXB	protein_coding	1621.12	1.37926	0.190939	7.22353	5.06533e-13	9.91778e-12
ENSG00000134321	2	6865806	6898239	+	RSAD2	protein_coding	766.158	-5.2381	0.725173	-7.22324	5.07616e-13	9.9285e-12
ENSG00000105388	19	41708585	41730433	+	CEACAM5	protein_coding	13023.6	2.44588	0.338657	7.22229	5.11176e-13	9.98759e-12
ENSG00000198315	6	28141883	28159460	+	ZKSCAN8	protein_coding	670.726	-1.93235	0.267604	-7.22092	5.16374e-13	1.00785e-11
ENSG00000263528	1	206470476	206496889	+	IKBKE	protein_coding	269.159	-2.50205	0.346537	-7.22014	5.19328e-13	1.01255e-11
ENSG00000152359	5	75674124	75717448	-	POC5	protein_coding	276.859	-1.94359	0.269278	-7.21779	5.28374e-13	1.02911e-11
ENSG00000187098	3	69739435	69968337	+	MITF	protein_coding	543.596	-1.46401	0.202854	-7.21709	5.31117e-13	1.03337e-11
ENSG00000088205	2	117814691	117832377	+	DDX18	protein_coding	1838.36	-1.48504	0.205857	-7.21394	5.4356e-13	1.05647e-11
ENSG00000197170	17	67337916	67366605	-	PSMD12	protein_coding	1287.26	-1.08448	0.150378	-7.2117	5.52596e-13	1.0729e-11
ENSG00000167106	9	127940582	127980989	-	FAM102A	protein_coding	1544.08	2.29106	0.31771	7.21116	5.54775e-13	1.07601e-11
ENSG00000143862	1	202133404	202144743	-	ARL8A	protein_coding	566.456	1.96513	0.272567	7.20973	5.60622e-13	1.08621e-11
ENSG00000064933	2	189784085	189877629	+	PMS1	protein_coding	476.916	-1.44576	0.20069	-7.20396	5.84906e-13	1.13208e-11
ENSG00000176915	12	132725503	132761832	-	ANKLE2	protein_coding	1738.06	1.07735	0.149607	7.20119	5.96895e-13	1.15408e-11
ENSG00000276850	10	47908064	47991877	-	AC245041.2	lncRNA	363.24	-2.58123	0.358556	-7.19896	6.06749e-13	1.17191e-11
ENSG00000276600	1	205976740	206003461	-	RAB7B	protein_coding	260.509	-2.8832	0.400539	-7.19831	6.0964e-13	1.17627e-11
ENSG00000110987	12	122019422	122062044	+	BCL7A	protein_coding	466.201	1.40649	0.195447	7.19625	6.18889e-13	1.19287e-11
ENSG00000197779	X	47836902	48002561	+	ZNF81	protein_coding	194.904	-1.74327	0.242343	-7.19339	6.31998e-13	1.21688e-11
ENSG00000136827	9	129812942	129824244	-	TOR1A	protein_coding	631.236	-1.13373	0.157679	-7.19013	6.47294e-13	1.24503e-11
ENSG00000159905	19	43951223	43967709	+	ZNF221	protein_coding	32.258	-4.59176	0.63882	-7.18788	6.58058e-13	1.26443e-11
ENSG00000258667	14	61707564	61751099	-	HIF1A-AS3	lncRNA	170.149	2.77697	0.386738	7.18048	6.94676e-13	1.3334e-11
ENSG00000143353	1	219173869	219212865	+	LYPLAL1	protein_coding	333.303	-1.59631	0.222347	-7.17935	7.0042e-13	1.34165e-11
ENSG00000257621	14	58265365	58298134	-	PSMA3-AS1	lncRNA	486.35	-1.56391	0.21783	-7.17947	6.99802e-13	1.34165e-11
ENSG00000166889	11	59636716	59669037	-	PATL1	protein_coding	721.546	1.48415	0.206865	7.17448	7.25835e-13	1.3889e-11
ENSG00000141526	17	82228397	82261129	+	SLC16A3	protein_coding	2518.46	2.33398	0.325375	7.1732	7.32652e-13	1.4005e-11
ENSG00000267710	19	56272748	56310454	+	EDDM13	protein_coding	51.4236	-4.33028	0.603698	-7.17292	7.34155e-13	1.40193e-11
ENSG00000142669	1	26280086	26281522	+	SH3BGRL3	protein_coding	925.116	2.16315	0.3017	7.16987	7.50664e-13	1.43051e-11
ENSG00000180346	4	89111500	89114899	+	TIGD2	protein_coding	188.355	-1.87374	0.261334	-7.16992	7.50399e-13	1.43051e-11
ENSG00000169245	4	76021118	76023497	-	CXCL10	protein_coding	635.112	-8.69333	1.21259	-7.16923	7.54229e-13	1.43582e-11
ENSG00000143845	1	204131062	204152044	-	ETNK2	protein_coding	106.148	2.5516	0.356186	7.16368	7.85399e-13	1.49363e-11
ENSG00000129657	17	77088749	77217101	+	SEC14L1	protein_coding	1570.75	2.05367	0.286777	7.16119	7.99773e-13	1.5194e-11
ENSG00000178750	3	94014365	94028597	-	STX19	protein_coding	142.808	-2.99944	0.418883	-7.16055	8.03532e-13	1.52498e-11
ENSG00000177981	12	48147789	48181213	-	ASB8	protein_coding	366.314	-1.56616	0.218737	-7.16001	8.06703e-13	1.52944e-11
ENSG00000175928	3	3799431	3849834	+	LRRN1	protein_coding	357.9	-2.89386	0.404246	-7.15865	8.14755e-13	1.54312e-11
ENSG00000166508	7	100092728	100101940	-	MCM7	protein_coding	451.753	-1.76876	0.247138	-7.15697	8.24788e-13	1.56053e-11
ENSG00000100078	22	31134807	31140508	-	PLA2G3	protein_coding	49.9464	4.9105	0.686245	7.1556	8.33071e-13	1.5746e-11
ENSG00000173166	2	203394345	203535335	-	RAPH1	protein_coding	140.494	2.65133	0.370711	7.15202	8.55129e-13	1.61464e-11
ENSG00000127081	9	92844182	92878038	-	ZNF484	protein_coding	164.075	-2.38655	0.333717	-7.15142	8.58837e-13	1.62e-11
ENSG00000099797	19	14517085	14565980	+	TECR	protein_coding	1222.05	1.91234	0.267436	7.15064	8.63714e-13	1.62754e-11
ENSG00000163565	1	158999968	159055155	+	IFI16	protein_coding	4562.78	-1.79798	0.251458	-7.15022	8.66413e-13	1.63097e-11
ENSG00000158615	1	204403381	204411817	-	PPP1R15B	protein_coding	988.297	1.33556	0.186805	7.14952	8.70816e-13	1.63759e-11
ENSG00000091732	7	130018287	130051451	-	ZC3HC1	protein_coding	110.494	-2.67004	0.373481	-7.14907	8.73647e-13	1.64125e-11
ENSG00000186660	11	58579063	58621550	+	ZFP91	protein_coding	1318.25	1.14243	0.160178	7.13223	9.87581e-13	1.85341e-11
ENSG00000037897	12	57768471	57772119	-	METTL1	protein_coding	38.3888	-3.36087	0.471272	-7.13149	9.92856e-13	1.86143e-11
ENSG00000112144	6	53001279	53061802	-	ICK	protein_coding	855.984	-1.65148	0.231603	-7.13063	9.99095e-13	1.87123e-11
ENSG00000125285	13	94709622	94712545	-	SOX21	protein_coding	210.286	-1.89972	0.266434	-7.13017	1.00244e-12	1.8756e-11
ENSG00000237512	10	71217224	71218228	-	UNC5B-AS1	lncRNA	152.024	2.08562	0.292663	7.12637	1.03052e-12	1.9262e-11
ENSG00000186529	19	15640897	15662825	+	CYP4F3	protein_coding	509.805	2.12288	0.297899	7.12616	1.03207e-12	1.92715e-11
ENSG00000151929	10	119651370	119677819	+	BAG3	protein_coding	1084.96	2.25207	0.316061	7.12542	1.03763e-12	1.93559e-11
ENSG00000197037	7	99616946	99632408	+	ZSCAN25	protein_coding	175.574	-1.66693	0.233949	-7.12518	1.03942e-12	1.93698e-11
ENSG00000115841	2	37923187	38067142	+	RMDN2	protein_coding	136.877	-2.67001	0.374829	-7.12326	1.05405e-12	1.96227e-11
ENSG00000132196	1	162790702	162812817	+	HSD17B7	protein_coding	385.156	1.877	0.263556	7.12183	1.06507e-12	1.9808e-11
ENSG00000170325	11	129899706	130002835	-	PRDM10	protein_coding	295.313	1.57001	0.220507	7.11998	1.0794e-12	2.00544e-11
ENSG00000116106	2	221418027	221574202	-	EPHA4	protein_coding	1036.28	-2.30245	0.323612	-7.11486	1.1203e-12	2.07934e-11
ENSG00000217165	6	39110321	39112952	+	ANKRD18EP	processed_pseudogene	38.3159	-4.42729	0.622554	-7.1115	1.14786e-12	2.12836e-11
ENSG00000107771	10	84328586	84518521	+	CCSER2	protein_coding	1167.16	1.14146	0.160559	7.1093	1.16637e-12	2.15836e-11
ENSG00000247708	4	4542131	4787359	+	STX18-AS1	lncRNA	54.2508	-2.7648	0.388899	-7.10931	1.16628e-12	2.15836e-11
ENSG00000236164	6	46758296	46761158	-	AL161618.1	lncRNA	185.956	-2.22593	0.313177	-7.10756	1.1811e-12	2.18345e-11
ENSG00000175567	11	73974672	73983246	-	UCP2	protein_coding	2934.67	1.64139	0.231006	7.1054	1.19973e-12	2.21568e-11
ENSG00000168476	8	22138020	22141951	-	REEP4	protein_coding	410.907	2.10206	0.295997	7.10161	1.23312e-12	2.27508e-11
ENSG00000141627	18	49041474	49461347	-	DYM	protein_coding	953.594	1.11507	0.157035	7.10078	1.24052e-12	2.28646e-11
ENSG00000162924	2	60881521	60931610	+	REL	protein_coding	795.884	1.25761	0.17729	7.09352	1.30738e-12	2.4073e-11
ENSG00000060138	12	10699089	10723323	-	YBX3	protein_coding	4088.81	1.25255	0.176615	7.09196	1.32222e-12	2.43221e-11
ENSG00000147162	X	71533104	71575892	+	OGT	protein_coding	4173.56	-1.32137	0.186382	-7.08957	1.3453e-12	2.47221e-11
ENSG00000198131	19	58228594	58277495	+	ZNF544	protein_coding	364.868	-1.85794	0.262182	-7.08647	1.37581e-12	2.52577e-11
ENSG00000184009	17	81509971	81523847	-	ACTG1	protein_coding	22092.5	2.5544	0.360486	7.08599	1.38049e-12	2.53186e-11
ENSG00000159885	19	44025342	44033110	+	ZNF222	protein_coding	39.9077	-4.2992	0.606756	-7.08556	1.38486e-12	2.53736e-11
ENSG00000105321	19	47255980	47273701	+	CCDC9	protein_coding	188.718	2.0477	0.289045	7.08438	1.39671e-12	2.55654e-11
ENSG00000196628	18	55222185	55664787	-	TCF4	protein_coding	435.308	-2.39243	0.337778	-7.08286	1.41212e-12	2.58219e-11
ENSG00000147548	8	38269704	38382272	-	NSD3	protein_coding	1560.16	0.826476	0.116706	7.08171	1.42387e-12	2.60112e-11
ENSG00000108349	17	40140318	40172171	+	CASC3	protein_coding	603.736	1.38514	0.195657	7.07945	1.44727e-12	2.64127e-11
ENSG00000102572	13	98445185	98577940	-	STK24	protein_coding	1447.63	1.69472	0.2394	7.07902	1.45174e-12	2.64681e-11
ENSG00000113649	5	146447311	146511961	+	TCERG1	protein_coding	1442.46	1.10258	0.155794	7.07717	1.47131e-12	2.67986e-11
ENSG00000188738	2	185738804	185833290	+	FSIP2	protein_coding	68.6655	-2.72222	0.384741	-7.07544	1.48972e-12	2.71073e-11
ENSG00000186187	16	74999024	75110994	+	ZNRF1	protein_coding	332.712	1.57788	0.223026	7.07489	1.49571e-12	2.71897e-11
ENSG00000184454	1	24556087	24609328	+	NCMAP	protein_coding	257.177	2.02569	0.286358	7.07397	1.50561e-12	2.73427e-11
ENSG00000061676	2	182909115	183038858	-	NCKAP1	protein_coding	3986.8	1.20623	0.17052	7.07384	1.50709e-12	2.73429e-11
ENSG00000251474	3	129382922	129399655	-	RPL32P3	transcribed_unprocessed_pseudogene	450.836	-1.62378	0.229561	-7.07342	1.51167e-12	2.73991e-11
ENSG00000263874	17	38925168	38929384	+	LINC00672	protein_coding	23.6344	-7.5442	1.06661	-7.07306	1.51554e-12	2.74426e-11
ENSG00000072756	3	3126933	3150879	+	TRNT1	protein_coding	352.082	-1.33629	0.18895	-7.07218	1.52517e-12	2.75631e-11
ENSG00000136040	12	94148577	94307675	+	PLXNC1	protein_coding	92.1208	-2.74173	0.387674	-7.07225	1.52439e-12	2.75631e-11
ENSG00000175164	9	133250401	133276024	-	ABO	protein_coding	509.678	-1.97943	0.279918	-7.07148	1.53285e-12	2.76748e-11
ENSG00000137601	4	169392857	169612629	-	NEK1	protein_coding	1128.7	-1.37509	0.194559	-7.06772	1.57495e-12	2.83804e-11
ENSG00000159840	7	143381295	143391111	+	ZYX	protein_coding	825.367	2.21453	0.313331	7.06772	1.57499e-12	2.83804e-11
ENSG00000120053	10	99396870	99430624	-	GOT1	protein_coding	1391.22	1.50586	0.213134	7.06532	1.60248e-12	2.88478e-11
ENSG00000164506	6	147204425	147390476	+	STXBP5	protein_coding	441.137	-1.46355	0.20721	-7.06311	1.62811e-12	2.92807e-11
ENSG00000197006	16	21597218	21657473	+	METTL9	protein_coding	1674.79	1.7417	0.246645	7.06154	1.64666e-12	2.95856e-11
ENSG00000145990	6	13357830	13487662	-	GFOD1	protein_coding	352.915	1.91307	0.271176	7.05473	1.72931e-12	3.10406e-11
ENSG00000170379	7	143620952	143730409	+	TCAF2	protein_coding	25.4769	-7.34426	1.04128	-7.05313	1.74943e-12	3.13714e-11
ENSG00000034693	6	143450805	143490616	+	PEX3	protein_coding	244.04	-1.67062	0.236946	-7.05063	1.78112e-12	3.19088e-11
ENSG00000056972	6	111555381	111606906	-	TRAF3IP2	protein_coding	666.094	1.53113	0.217203	7.0493	1.79822e-12	3.21839e-11
ENSG00000279806	17	40473554	40475289	-	AC018629.1	TEC	91.487	-4.34145	0.615973	-7.04812	1.81351e-12	3.24263e-11
ENSG00000224810	1	182062677	182069253	-	AL355482.1	lncRNA	32.1044	-4.77494	0.677552	-7.04734	1.82369e-12	3.25769e-11
ENSG00000154114	11	121024072	121090775	+	TBCEL	protein_coding	488.773	-1.00844	0.143098	-7.0472	1.82549e-12	3.25777e-11
ENSG00000010256	3	48599002	48610976	-	UQCRC1	protein_coding	2866.49	1.21337	0.17226	7.04383	1.87031e-12	3.33454e-11
ENSG00000188064	22	45920366	45977162	-	WNT7B	protein_coding	1051.79	2.39661	0.340251	7.04365	1.87272e-12	3.33564e-11
ENSG00000151131	12	104986316	105074197	+	C12orf45	protein_coding	155.143	-1.70583	0.242313	-7.03976	1.92577e-12	3.42684e-11
ENSG00000081923	18	57646426	57803315	-	ATP8B1	protein_coding	1532.96	1.12511	0.159866	7.03785	1.95234e-12	3.47079e-11
ENSG00000109193	4	69841212	69860145	-	SULT1E1	protein_coding	40.7641	-5.1838	0.736603	-7.03744	1.95803e-12	3.47756e-11
ENSG00000175471	5	94703741	95284575	-	MCTP1	protein_coding	539.394	1.56581	0.222582	7.03475	1.99619e-12	3.54194e-11
ENSG00000134109	3	5187646	5219958	+	EDEM1	protein_coding	661.6	1.59494	0.226764	7.03347	2.01463e-12	3.57124e-11
ENSG00000100292	22	35380361	35394207	+	HMOX1	protein_coding	469.48	2.23055	0.317203	7.03192	2.03705e-12	3.60754e-11
ENSG00000136243	7	23181841	23201011	+	NUP42	protein_coding	296.185	-1.96698	0.279746	-7.03133	2.04579e-12	3.61957e-11
ENSG00000011258	17	51177425	51260163	-	MBTD1	protein_coding	352.408	-1.50316	0.213834	-7.02957	2.07173e-12	3.66197e-11
ENSG00000135999	2	148644440	148787569	+	EPC2	protein_coding	219.825	-1.42271	0.202421	-7.02846	2.0883e-12	3.68774e-11
ENSG00000118322	5	160563120	160852214	-	ATP10B	protein_coding	2708.62	-1.47794	0.210309	-7.02749	2.10286e-12	3.70992e-11
ENSG00000179912	12	57253762	57431005	-	R3HDM2	protein_coding	304.672	1.66619	0.237105	7.02723	2.10674e-12	3.71324e-11
ENSG00000151893	10	118674167	118755249	-	CACUL1	protein_coding	1386.02	1.07012	0.152297	7.02652	2.11754e-12	3.72872e-11
ENSG00000164743	8	13566869	13568288	+	C8orf48	protein_coding	77.0169	-4.06015	0.577879	-7.02596	2.12606e-12	3.74016e-11
ENSG00000058668	1	203626561	203744081	+	ATP2B4	protein_coding	2684.14	1.30892	0.186307	7.02561	2.13128e-12	3.7458e-11
ENSG00000125753	19	45506579	45526983	+	VASP	protein_coding	753.539	1.77961	0.253356	7.02415	2.15373e-12	3.78167e-11
ENSG00000143437	1	150809713	150876708	-	ARNT	protein_coding	669.44	1.17116	0.166739	7.02387	2.15808e-12	3.78573e-11
ENSG00000119318	9	107283137	107332192	+	RAD23B	protein_coding	2594.67	1.45074	0.206576	7.02277	2.17519e-12	3.81213e-11
ENSG00000281490	7	128655962	128658791	-	CICP14	processed_pseudogene	184.81	-2.55695	0.364382	-7.01723	2.26318e-12	3.96259e-11
ENSG00000197953	3	151733916	151761339	+	AADACL2	protein_coding	41.26	-6.17572	0.880422	-7.01449	2.30783e-12	4.03697e-11
ENSG00000240849	20	50118254	50153734	-	TMEM189	protein_coding	564.176	1.72414	0.245804	7.01431	2.31095e-12	4.0386e-11
ENSG00000137094	9	34989641	34998900	+	DNAJB5	protein_coding	315.035	2.50404	0.357011	7.0139	2.31768e-12	4.04276e-11
ENSG00000150961	4	118722823	118838683	-	SEC24D	protein_coding	1144.88	1.6133	0.230014	7.0139	2.31757e-12	4.04276e-11
ENSG00000163739	4	73869393	73871308	+	CXCL1	protein_coding	1482.87	-2.42819	0.346239	-7.01306	2.33159e-12	4.06318e-11
ENSG00000166130	12	98613405	98645113	-	IKBIP	protein_coding	164.99	-2.06541	0.294539	-7.01235	2.34349e-12	4.0801e-11
ENSG00000007047	19	45079288	45305284	+	MARK4	protein_coding	416.547	2.08795	0.297785	7.01158	2.35635e-12	4.09864e-11
ENSG00000114573	3	113747033	113812056	+	ATP6V1A	protein_coding	2398.39	0.686482	0.0979256	7.01024	2.37903e-12	4.1342e-11
ENSG00000151883	5	50665899	50846519	+	PARP8	protein_coding	1024.29	-1.19838	0.171105	-7.00375	2.49202e-12	4.3265e-11
ENSG00000009724	1	11026523	11047239	-	MASP2	protein_coding	37.5159	-6.04548	0.863355	-7.00231	2.51773e-12	4.36705e-11
ENSG00000152582	5	35617844	35814611	+	SPEF2	protein_coding	2733.63	-1.41761	0.202558	-6.99857	2.58596e-12	4.48119e-11
ENSG00000083817	19	57571566	57578911	-	ZNF416	protein_coding	42.6706	-3.85015	0.550167	-6.99815	2.59361e-12	4.49026e-11
ENSG00000169692	9	136673143	136687457	-	AGPAT2	protein_coding	464.155	1.70939	0.244317	6.99659	2.62268e-12	4.53636e-11
ENSG00000263002	19	44141554	44160313	+	ZNF234	protein_coding	162.58	-1.79592	0.256698	-6.99626	2.62889e-12	4.54286e-11
ENSG00000196653	3	44712643	44723831	+	ZNF502	protein_coding	108.752	-4.14559	0.59269	-6.99453	2.66143e-12	4.59481e-11
ENSG00000171469	19	9604680	9621236	-	ZNF561	protein_coding	1052.21	-1.17929	0.168659	-6.99218	2.70649e-12	4.66825e-11
ENSG00000285972	10	84167228	84172093	-	CERNA2	lncRNA	184.673	-3.73553	0.534261	-6.99195	2.71088e-12	4.67148e-11
ENSG00000155530	7	134127299	134264591	+	LRGUK	protein_coding	479.313	-1.43103	0.204724	-6.99003	2.7483e-12	4.73156e-11
ENSG00000279339	17	78897264	78900152	+	AC100788.2	TEC	32.7369	4.7879	0.685621	6.98331	2.88312e-12	4.95908e-11
ENSG00000112079	6	36493892	36547479	-	STK38	protein_coding	2239.62	-0.810767	0.116105	-6.98303	2.88873e-12	4.96411e-11
ENSG00000149187	11	47465933	47565569	-	CELF1	protein_coding	1971.25	0.891737	0.127773	6.9791	2.97073e-12	5.10031e-11
ENSG00000018510	2	177392757	177559299	+	AGPS	protein_coding	1293.57	-0.941579	0.135	-6.97464	3.06649e-12	5.25077e-11
ENSG00000101745	18	9136228	9285985	+	ANKRD12	protein_coding	1064.93	-1.55992	0.223659	-6.97455	3.06848e-12	5.25077e-11
ENSG00000135521	6	143843338	143863812	+	LTV1	protein_coding	177.083	-1.65909	0.237876	-6.97462	3.06706e-12	5.25077e-11
ENSG00000184995	9	21480839	21482313	-	IFNE	protein_coding	55.9134	-4.02789	0.577516	-6.9745	3.0697e-12	5.25077e-11
ENSG00000166266	11	108008898	108107761	+	CUL5	protein_coding	795.058	-1.23982	0.177774	-6.97411	3.07817e-12	5.26041e-11
ENSG00000172939	3	38165089	38255484	+	OXSR1	protein_coding	755.386	1.29282	0.185405	6.97298	3.10304e-12	5.29802e-11
ENSG00000171962	17	17972813	18016889	+	DRC3	protein_coding	1243.28	-1.64574	0.236113	-6.97012	3.16673e-12	5.4018e-11
ENSG00000274026	9	67717411	67719178	-	FAM27E3	lncRNA	45.9863	-3.80532	0.54608	-6.96842	3.20509e-12	5.46221e-11
ENSG00000005486	7	75842602	75888926	+	RHBDD2	protein_coding	1535.12	1.81843	0.261111	6.96419	3.30302e-12	5.62394e-11
ENSG00000204564	6	30647039	30653210	+	C6orf136	protein_coding	204.217	1.67771	0.240911	6.96401	3.30723e-12	5.62594e-11
ENSG00000171425	19	55635459	55645623	+	ZNF581	protein_coding	122.495	1.8516	0.265981	6.96139	3.36921e-12	5.72612e-11
ENSG00000168389	1	39955112	39969968	+	MFSD2A	protein_coding	312.959	2.01037	0.288864	6.95957	3.41312e-12	5.79543e-11
ENSG00000215386	21	15928296	16645467	+	MIR99AHG	lncRNA	204.637	-2.64188	0.379987	-6.95257	3.58703e-12	6.08515e-11
ENSG00000198742	7	99027438	99144100	-	SMURF1	protein_coding	656.513	1.71014	0.246025	6.9511	3.62437e-12	6.14288e-11
ENSG00000142794	1	21440128	21485005	+	NBPF3	protein_coding	184.099	-2.15754	0.310401	-6.95083	3.63145e-12	6.14926e-11
ENSG00000285869	16	19334011	19337804	+	LINC02858	lncRNA	24.2367	-7.29956	1.05042	-6.94922	3.6732e-12	6.21428e-11
ENSG00000163214	2	38797729	38875934	-	DHX57	protein_coding	894.263	-1.08392	0.156064	-6.94535	3.77517e-12	6.38096e-11
ENSG00000075188	12	102073103	102120120	-	NUP37	protein_coding	343.475	-1.53216	0.220623	-6.94473	3.79179e-12	6.40322e-11
ENSG00000206530	3	113286930	113441610	-	CFAP44	protein_coding	2605.02	-1.27903	0.184202	-6.94365	3.82098e-12	6.44664e-11
ENSG00000169908	3	149369022	149377692	-	TM4SF1	protein_coding	3473.92	1.49055	0.214744	6.94103	3.89248e-12	6.56131e-11
ENSG00000166225	12	69470349	69579789	+	FRS2	protein_coding	918.614	-1.48444	0.21389	-6.94018	3.9159e-12	6.59479e-11
ENSG00000131669	9	93121496	93134251	-	NINJ1	protein_coding	498.628	2.13983	0.308352	6.93956	3.93329e-12	6.61807e-11
ENSG00000249621	5	122321291	122323358	-	AC113349.1	lncRNA	122.136	-2.70974	0.390569	-6.93794	3.97851e-12	6.68809e-11
ENSG00000121390	13	19674752	19783019	-	PSPC1	protein_coding	681.301	-1.36571	0.196851	-6.93776	3.98363e-12	6.69062e-11
ENSG00000119285	1	236549005	236604516	-	HEATR1	protein_coding	1021.18	-1.46112	0.21061	-6.93755	3.98958e-12	6.69455e-11
ENSG00000166821	15	89677764	89690783	-	PEX11A	protein_coding	326.802	-1.83511	0.264536	-6.93707	4.00315e-12	6.71125e-11
ENSG00000111196	12	10604193	10613609	-	MAGOHB	protein_coding	157.535	-2.09327	0.301766	-6.93672	4.01309e-12	6.72087e-11
ENSG00000278493	15	41908204	41908714	-	AC039056.2	lncRNA	35.6054	4.61733	0.665646	6.93661	4.01614e-12	6.72087e-11
ENSG00000174365	20	38446343	38450940	+	SNHG11	lncRNA	71.9155	-2.53127	0.364929	-6.93634	4.02377e-12	6.72757e-11
ENSG00000164051	3	48432164	48440456	-	CCDC51	protein_coding	168.147	-1.84189	0.265598	-6.9349	4.06509e-12	6.79054e-11
ENSG00000171940	20	53567065	53609907	-	ZNF217	protein_coding	2646.04	1.0574	0.152491	6.93421	4.08504e-12	6.81772e-11
ENSG00000234284	5	179023804	179035064	+	ZNF879	protein_coding	119.414	-2.62462	0.37875	-6.9297	4.21727e-12	7.03206e-11
ENSG00000113282	5	157785743	157859175	-	CLINT1	protein_coding	6938.91	0.72858	0.105146	6.92922	4.23158e-12	7.04959e-11
ENSG00000136240	7	6445953	6484190	-	KDELR2	protein_coding	2380.16	1.14965	0.165924	6.92878	4.24474e-12	7.06516e-11
ENSG00000154188	8	107249482	107498055	-	ANGPT1	protein_coding	165.714	-2.23911	0.323248	-6.9269	4.30151e-12	7.15324e-11
ENSG00000162522	1	32741830	32774970	+	KIAA1522	protein_coding	3859.19	1.88882	0.272765	6.92469	4.36917e-12	7.25924e-11
ENSG00000071243	7	120950763	120977216	+	ING3	protein_coding	329.321	-1.74178	0.25155	-6.92418	4.38522e-12	7.27939e-11
ENSG00000148343	9	129036621	129072082	+	MIGA2	protein_coding	377.297	1.2882	0.186076	6.92299	4.42197e-12	7.33382e-11
ENSG00000166263	17	54968727	55173632	+	STXBP4	protein_coding	709.082	-1.53221	0.221329	-6.9228	4.4281e-12	7.33743e-11
ENSG00000197013	19	21496682	21556270	+	ZNF429	protein_coding	361.835	-1.89945	0.274443	-6.9211	4.48154e-12	7.41936e-11
ENSG00000163681	3	57755450	57930003	+	SLMAP	protein_coding	2039.42	0.988205	0.142797	6.92033	4.5058e-12	7.45286e-11
ENSG00000062485	12	56271699	56300391	-	CS	protein_coding	1853.87	1.22899	0.177628	6.91888	4.5522e-12	7.52289e-11
ENSG00000123124	8	86342547	86478420	+	WWP1	protein_coding	1019.54	1.06211	0.153523	6.91824	4.57305e-12	7.55062e-11
ENSG00000180917	16	71281389	71289715	-	CMTR2	protein_coding	806.373	-1.29668	0.187474	-6.91662	4.62538e-12	7.63023e-11
ENSG00000197557	2	177612999	177618742	-	TTC30A	protein_coding	775.301	-1.86859	0.270234	-6.91469	4.68895e-12	7.72822e-11
ENSG00000100934	14	39031919	39109646	-	SEC23A	protein_coding	1234.06	1.21516	0.175783	6.91282	4.75123e-12	7.82392e-11
ENSG00000172086	2	88027205	88064252	-	KRCC1	protein_coding	1018.19	-1.46344	0.211769	-6.91053	4.82856e-12	7.9442e-11
ENSG00000126814	14	60971441	60981170	-	TRMT5	protein_coding	292.222	-1.74589	0.252879	-6.90405	5.05405e-12	8.30782e-11
ENSG00000205352	12	53441678	53446645	+	PRR13	protein_coding	595.904	1.22113	0.17692	6.90216	5.1219e-12	8.4119e-11
ENSG00000107614	10	17137336	17202054	-	TRDMT1	protein_coding	219.87	-1.70029	0.246378	-6.90114	5.15852e-12	8.46454e-11
ENSG00000161798	12	49961872	49965682	+	AQP5	protein_coding	5405.16	3.70316	0.536627	6.90082	5.1705e-12	8.47669e-11
ENSG00000237440	19	20535825	20565809	-	ZNF737	protein_coding	254.475	-1.83163	0.265457	-6.89992	5.20326e-12	8.52287e-11
ENSG00000111276	12	12715058	12722369	+	CDKN1B	protein_coding	559.184	1.51336	0.219361	6.89896	5.2384e-12	8.57285e-11
ENSG00000102225	X	47217860	47229997	+	CDK16	protein_coding	1007.92	1.52062	0.220502	6.89618	5.34203e-12	8.73474e-11
ENSG00000066855	8	65644734	65771261	+	MTFR1	protein_coding	575.326	1.21428	0.17609	6.89581	5.3559e-12	8.74971e-11
ENSG00000167110	9	128255829	128275995	-	GOLGA2	protein_coding	1386.73	1.60386	0.232592	6.89562	5.36302e-12	8.75362e-11
ENSG00000279518	8	134783694	134785879	-	AC083843.4	TEC	21.6386	-7.1609	1.0386	-6.89478	5.39486e-12	8.79784e-11
ENSG00000243477	3	50296402	50299421	-	NAA80	protein_coding	65.893	2.5326	0.367368	6.8939	5.42827e-12	8.84455e-11
ENSG00000167637	19	43827321	43852017	+	ZNF283	protein_coding	144.683	-1.48563	0.215504	-6.89373	5.43467e-12	8.84721e-11
ENSG00000151461	10	11920022	12043170	-	UPF2	protein_coding	1232.58	-1.16777	0.169436	-6.89211	5.49726e-12	8.94125e-11
ENSG00000189334	1	153614255	153616986	-	S100A14	protein_coding	12190.8	2.63462	0.382313	6.89126	5.52991e-12	8.98646e-11
ENSG00000214018	X	44309314	44310476	-	RRM2P3	processed_pseudogene	33.8269	-4.59427	0.666809	-6.88993	5.58208e-12	9.0633e-11
ENSG00000141378	17	59674636	59707626	-	PTRH2	protein_coding	318.576	-1.47447	0.214092	-6.88709	5.69463e-12	9.23795e-11
ENSG00000148154	9	111896814	111935369	+	UGCG	protein_coding	2478.71	1.10491	0.160462	6.88576	5.74798e-12	9.31635e-11
ENSG00000145911	5	178113532	178126081	+	N4BP3	protein_coding	130.152	2.88748	0.419579	6.88186	5.90756e-12	9.56663e-11
ENSG00000149257	11	75562056	75572783	+	SERPINH1	protein_coding	1345.92	1.81155	0.263319	6.87968	5.99851e-12	9.70544e-11
ENSG00000163110	4	94451857	94668227	+	PDLIM5	protein_coding	3871.58	1.01328	0.147305	6.87879	6.03624e-12	9.75797e-11
ENSG00000149483	11	61362344	61369509	+	TMEM138	protein_coding	926.802	-1.46338	0.212805	-6.87663	6.12858e-12	9.89861e-11
ENSG00000163157	1	151169986	151176284	-	TMOD4	protein_coding	21.9315	-7.12071	1.03575	-6.87495	6.20133e-12	1.00074e-10
ENSG00000008513	8	133454848	133571940	-	ST3GAL1	protein_coding	593.752	1.63811	0.238311	6.87384	6.2496e-12	1.00765e-10
ENSG00000206503	6	29941260	29945884	+	HLA-A	protein_coding	5468.99	1.34839	0.196205	6.87234	6.31568e-12	1.01742e-10
ENSG00000133812	11	9778667	10294207	-	SBF2	protein_coding	1207.94	1.18094	0.171868	6.87119	6.36707e-12	1.02481e-10
ENSG00000257354	12	62602752	62622213	+	AC048341.1	lncRNA	27.4355	-7.74513	1.12755	-6.869	6.46532e-12	1.03972e-10
ENSG00000188277	15	40769980	40772449	+	C15orf62	protein_coding	104.84	2.17751	0.317255	6.86358	6.71535e-12	1.079e-10
ENSG00000155100	8	91070196	91087095	+	OTUD6B	protein_coding	333.206	-1.40877	0.205289	-6.8624	6.77118e-12	1.08702e-10
ENSG00000168612	20	45881227	45885266	+	ZSWIM1	protein_coding	180.25	-1.56531	0.228138	-6.86123	6.8268e-12	1.095e-10
ENSG00000136689	2	113107214	113134016	+	IL1RN	protein_coding	6412.4	2.33938	0.341108	6.8582	6.97357e-12	1.11758e-10
ENSG00000111348	12	14942031	14961728	-	ARHGDIB	protein_coding	1987.83	-1.81966	0.265351	-6.85757	7.0044e-12	1.12155e-10
ENSG00000183665	8	124450820	124462150	+	TRMT12	protein_coding	244.413	-1.83091	0.267121	-6.85423	7.16993e-12	1.14707e-10
ENSG00000225808	2	177229191	177229506	-	DNAJC19P5	processed_pseudogene	52.7531	3.09899	0.452171	6.85357	7.20271e-12	1.15132e-10
ENSG00000179361	15	74541177	74598131	+	ARID3B	protein_coding	191.317	2.03643	0.297141	6.8534	7.21153e-12	1.15173e-10
ENSG00000196652	7	99504651	99534700	+	ZKSCAN5	protein_coding	271.128	-1.34085	0.195721	-6.85082	7.34267e-12	1.17167e-10
ENSG00000178096	1	149887890	149900798	+	BOLA1	protein_coding	193.811	-1.79847	0.262568	-6.84953	7.40918e-12	1.18126e-10
ENSG00000184574	12	6618835	6635960	-	LPAR5	protein_coding	99.1147	3.17008	0.463024	6.84648	7.56914e-12	1.20573e-10
ENSG00000134324	2	11677595	11827409	+	LPIN1	protein_coding	342.536	1.50375	0.219675	6.84531	7.63094e-12	1.21453e-10
ENSG00000171865	2	3541430	3558333	-	RNASEH1	protein_coding	251.968	-1.41742	0.207072	-6.84502	7.64628e-12	1.21593e-10
ENSG00000068137	17	42667914	42676994	-	PLEKHH3	protein_coding	696.51	1.55839	0.227757	6.84234	7.79103e-12	1.23789e-10
ENSG00000163694	4	40423267	40630875	-	RBM47	protein_coding	2058.9	1.18755	0.173583	6.84144	7.84017e-12	1.24463e-10
ENSG00000169403	1	28147166	28193936	-	PTAFR	protein_coding	1379.47	2.52993	0.370058	6.83658	8.11069e-12	1.28647e-10
ENSG00000105771	19	43727983	43754962	-	SMG9	protein_coding	296.309	1.62794	0.238147	6.83584	8.15241e-12	1.29088e-10
ENSG00000171135	3	9890574	9894349	+	JAGN1	protein_coding	372.451	-1.17433	0.17179	-6.83587	8.15091e-12	1.29088e-10
ENSG00000118508	6	146543833	146554953	+	RAB32	protein_coding	236.353	2.67308	0.391462	6.82845	8.58397e-12	1.35805e-10
ENSG00000072201	4	53459301	53701405	-	LNX1	protein_coding	743.92	1.08735	0.159277	6.82677	8.68471e-12	1.37282e-10
ENSG00000128563	7	102363872	102426676	+	PRKRIP1	protein_coding	173.297	-1.22456	0.179476	-6.82297	8.91797e-12	1.40849e-10
ENSG00000143398	1	151197949	151249536	+	PIP5K1A	protein_coding	1230.96	1.10297	0.161662	6.82271	8.93361e-12	1.40976e-10
ENSG00000225830	10	49454470	49539538	-	ERCC6	protein_coding	423.978	-1.64546	0.241219	-6.82145	9.01255e-12	1.42101e-10
ENSG00000174437	12	110280756	110351093	+	ATP2A2	protein_coding	6002.4	1.29807	0.190376	6.81847	9.20177e-12	1.44961e-10
ENSG00000171621	1	9292894	9369532	+	SPSB1	protein_coding	857.072	1.36402	0.200082	6.8173	9.27692e-12	1.46021e-10
ENSG00000178381	7	1152071	1160759	-	ZFAND2A	protein_coding	300.276	1.80345	0.264624	6.81514	9.41731e-12	1.48105e-10
ENSG00000089327	19	35154730	35169881	+	FXYD5	protein_coding	178.301	2.05172	0.301074	6.81468	9.44769e-12	1.48457e-10
ENSG00000165609	10	12165330	12196144	-	NUDT5	protein_coding	1206.47	-1.04255	0.153032	-6.81266	9.58077e-12	1.50421e-10
ENSG00000236699	4	105552620	105708093	+	ARHGEF38	protein_coding	418.444	-1.59479	0.234121	-6.81184	9.63553e-12	1.51152e-10
ENSG00000198642	9	21329665	21335404	-	KLHL9	protein_coding	1659.07	-1.36943	0.201129	-6.80872	9.84731e-12	1.54344e-10
ENSG00000148834	10	104235356	104267459	+	GSTO1	protein_coding	1597.6	1.23862	0.181922	6.80855	9.85865e-12	1.54391e-10
ENSG00000174292	17	7380534	7389774	+	TNK1	protein_coding	176.765	-2.55195	0.374827	-6.80834	9.87306e-12	1.54486e-10
ENSG00000153046	6	4706159	4955551	+	CDYL	protein_coding	353.902	1.82629	0.268274	6.80756	9.92703e-12	1.552e-10
ENSG00000165782	14	20457719	20461612	-	PIP4P1	protein_coding	474.809	1.17632	0.172844	6.80569	1.00567e-11	1.57095e-10
ENSG00000130349	6	107028199	107051586	+	MTRES1	protein_coding	247.097	-1.88206	0.276634	-6.80343	1.02159e-11	1.59358e-10
ENSG00000183060	15	99715697	99733561	-	LYSMD4	protein_coding	80.1683	-2.41749	0.355337	-6.80339	1.02188e-11	1.59358e-10
ENSG00000182329	2	202073255	202205188	+	KIAA2012	protein_coding	735.325	-1.19947	0.176361	-6.80123	1.03728e-11	1.61624e-10
ENSG00000265972	1	145992435	145996579	-	TXNIP	protein_coding	26034	-1.51655	0.223042	-6.79936	1.05082e-11	1.63458e-10
ENSG00000280187	5	69186359	69189452	-	AC022107.1	TEC	79.74	-2.2924	0.337143	-6.79948	1.04995e-11	1.63458e-10
ENSG00000004766	7	93232340	93361123	+	VPS50	protein_coding	854.064	-1.45567	0.21412	-6.7984	1.05785e-11	1.64414e-10
ENSG00000143971	2	67397322	67412089	+	ETAA1	protein_coding	340.63	-1.45827	0.214747	-6.79067	1.11613e-11	1.73327e-10
ENSG00000181619	14	59429022	59465342	-	GPR135	protein_coding	89.1838	-2.27343	0.334846	-6.78948	1.12542e-11	1.74624e-10
ENSG00000111674	12	6913745	6923698	+	ENO2	protein_coding	228.48	1.3634	0.200834	6.78868	1.13161e-11	1.75438e-10
ENSG00000225492	1	89407679	89426243	+	GBP1P1	transcribed_unprocessed_pseudogene	129.426	-3.19135	0.47014	-6.78809	1.13631e-11	1.76018e-10
ENSG00000164114	4	155342658	155376970	-	MAP9	protein_coding	1583.29	-1.33285	0.196367	-6.78754	1.14058e-11	1.76533e-10
ENSG00000198832	22	31104772	31120069	-	SELENOM	protein_coding	194.518	1.55696	0.229401	6.78705	1.14448e-11	1.76842e-10
ENSG00000255302	15	48878134	48880173	+	EID1	protein_coding	2515.89	-1.18029	0.173901	-6.78712	1.14395e-11	1.76842e-10
ENSG00000112146	6	53051991	53100873	+	FBXO9	protein_coding	719.065	-1.27021	0.187261	-6.78308	1.17642e-11	1.81625e-10
ENSG00000167740	17	4143168	4187310	+	CYB5D2	protein_coding	318.249	-1.34131	0.197792	-6.78141	1.19013e-11	1.83588e-10
ENSG00000184939	16	68530090	68576072	+	ZFP90	protein_coding	497.768	-1.25272	0.184785	-6.77937	1.207e-11	1.86036e-10
ENSG00000131435	5	132257696	132273454	+	PDLIM4	protein_coding	484.075	1.91746	0.283016	6.77508	1.24337e-11	1.91484e-10
ENSG00000116138	1	15526813	15592379	+	DNAJC16	protein_coding	616.604	-0.996113	0.147091	-6.77208	1.26947e-11	1.9534e-10
ENSG00000079435	19	42401514	42427388	-	LIPE	protein_coding	101.712	2.02096	0.298516	6.77001	1.28774e-11	1.97987e-10
ENSG00000111615	12	75490863	75511636	-	KRR1	protein_coding	810.76	-1.46681	0.216677	-6.76957	1.29162e-11	1.98375e-10
ENSG00000118007	3	136336236	136752403	-	STAG1	protein_coding	513.202	-1.51256	0.223439	-6.76945	1.2927e-11	1.98375e-10
ENSG00000146376	6	129576132	129710177	-	ARHGAP18	protein_coding	3049.63	-1.22369	0.180768	-6.76937	1.29347e-11	1.98375e-10
ENSG00000253223	8	66984135	66986187	-	AC110998.1	processed_pseudogene	52.1587	-4.43205	0.655246	-6.76395	1.3428e-11	2.05771e-10
ENSG00000108828	17	43014607	43025123	-	VAT1	protein_coding	1286.08	2.10152	0.310892	6.75965	1.38324e-11	2.11792e-10
ENSG00000137547	8	54135241	54148514	+	MRPL15	protein_coding	694.399	-1.4354	0.212507	-6.7546	1.43229e-11	2.19122e-10
ENSG00000123933	4	2247432	2262109	-	MXD4	protein_coding	441.9	-1.61727	0.239678	-6.74768	1.5023e-11	2.29643e-10
ENSG00000124459	19	43912624	43935282	-	ZNF45	protein_coding	226.033	-1.75094	0.259514	-6.747	1.50932e-11	2.30526e-10
ENSG00000230387	20	23179272	23190419	+	AL118508.1	lncRNA	86.3957	3.33952	0.495065	6.74561	1.52382e-11	2.32549e-10
ENSG00000130725	19	58555712	58558954	-	UBE2M	protein_coding	471.754	1.7916	0.265649	6.74423	1.53841e-11	2.34582e-10
ENSG00000188352	9	20658309	20995955	+	FOCAD	protein_coding	3022.61	-1.18184	0.175306	-6.74156	1.56695e-11	2.38738e-10
ENSG00000116667	1	184387029	184629019	+	C1orf21	protein_coding	566.637	1.32456	0.196503	6.74064	1.57692e-11	2.4006e-10
ENSG00000177640	10	118046279	118210158	+	CASC2	lncRNA	443.917	-1.59086	0.23602	-6.74039	1.57957e-11	2.40265e-10
ENSG00000206573	3	9349689	9398579	-	THUMPD3-AS1	lncRNA	356.158	-1.43314	0.212701	-6.73784	1.60756e-11	2.44322e-10
ENSG00000081148	3	101222546	101320575	-	IMPG2	protein_coding	18.1488	-7.03679	1.04445	-6.73732	1.61332e-11	2.44997e-10
ENSG00000145907	5	151771045	151812785	+	G3BP1	protein_coding	3752.26	-0.898553	0.133461	-6.7327	1.66544e-11	2.52703e-10
ENSG00000189283	3	59747277	61251459	-	FHIT	protein_coding	111.966	1.84792	0.274474	6.73258	1.66679e-11	2.52703e-10
ENSG00000143622	1	155897808	155911404	-	RIT1	protein_coding	1626.84	0.971665	0.144331	6.73219	1.67127e-11	2.53146e-10
ENSG00000144120	2	119679167	119686507	+	TMEM177	protein_coding	106.635	-2.34685	0.348607	-6.73209	1.67244e-11	2.53146e-10
ENSG00000118492	6	146598967	146815462	+	ADGB	protein_coding	1343.21	-1.41236	0.209826	-6.73109	1.68394e-11	2.54679e-10
ENSG00000049883	5	72320367	72368395	+	PTCD2	protein_coding	212.448	-1.86494	0.277109	-6.72998	1.69681e-11	2.56417e-10
ENSG00000120471	11	128934731	128943399	-	TP53AIP1	protein_coding	193.551	-2.92452	0.434683	-6.72794	1.72078e-11	2.59826e-10
ENSG00000112029	6	152970519	152983579	-	FBXO5	protein_coding	62.4264	-4.54509	0.675741	-6.72609	1.74287e-11	2.62949e-10
ENSG00000040608	22	20241415	20283246	-	RTN4R	protein_coding	58.0842	3.6955	0.549509	6.72509	1.75482e-11	2.6432e-10
ENSG00000189180	10	38010650	38065088	+	ZNF33A	protein_coding	1078.37	-1.03157	0.15339	-6.72513	1.75436e-11	2.6432e-10
ENSG00000159399	2	74834127	74893359	+	HK2	protein_coding	1227.79	2.51218	0.373671	6.72298	1.78044e-11	2.67961e-10
ENSG00000163006	2	108786757	108885477	+	CCDC138	protein_coding	528.011	-1.68105	0.250074	-6.72219	1.79008e-11	2.69194e-10
ENSG00000110075	11	68460731	68615334	+	PPP6R3	protein_coding	2151.05	-1.07407	0.159797	-6.72151	1.79851e-11	2.70243e-10
ENSG00000140365	15	75336020	75343224	+	COMMD4	protein_coding	673.43	-1.22974	0.182982	-6.72054	1.81047e-11	2.7182e-10
ENSG00000113194	5	176447628	176510074	+	FAF2	protein_coding	1159.36	-0.867706	0.129154	-6.7184	1.83726e-11	2.75619e-10
ENSG00000230359	7	129055223	129057239	+	TPI1P2	transcribed_processed_pseudogene	19.6986	-6.87616	1.02353	-6.71806	1.84161e-11	2.76048e-10
ENSG00000226752	9	120824828	120854385	+	CUTALP	transcribed_unitary_pseudogene	250.975	-2.42508	0.361064	-6.71647	1.8618e-11	2.78848e-10
ENSG00000110717	11	68030617	68036644	+	NDUFS8	protein_coding	514.233	1.46835	0.218689	6.71434	1.88916e-11	2.82718e-10
ENSG00000129245	17	7591230	7614897	-	FXR2	protein_coding	458.511	1.29096	0.192374	6.71068	1.93715e-11	2.89666e-10
ENSG00000122085	2	241072169	241102332	-	MTERF4	protein_coding	266.718	-1.98229	0.295699	-6.70374	2.03145e-11	3.03522e-10
ENSG00000162643	1	84999147	85133138	+	WDR63	protein_coding	2329.86	-1.29041	0.19252	-6.70272	2.04577e-11	3.05416e-10
ENSG00000135604	6	144150517	144191939	+	STX11	protein_coding	149.17	1.8975	0.283141	6.70163	2.06108e-11	3.07454e-10
ENSG00000211460	2	121737103	121767853	+	TSN	protein_coding	791.42	-1.19621	0.178512	-6.70102	2.06967e-11	3.08488e-10
ENSG00000112118	6	52264014	52284881	-	MCM3	protein_coding	342.186	-1.84245	0.275061	-6.69833	2.10815e-11	3.13971e-10
ENSG00000135040	9	85941146	86025462	+	NAA35	protein_coding	742.34	-0.79951	0.119382	-6.69709	2.12605e-11	3.16383e-10
ENSG00000163002	2	183117513	183161680	+	NUP35	protein_coding	180.662	-1.9253	0.287521	-6.69619	2.13927e-11	3.18095e-10
ENSG00000149485	11	61799627	61829318	-	FADS1	protein_coding	201.125	2.22157	0.331786	6.69579	2.14516e-11	3.18715e-10
ENSG00000110841	12	27523431	27695564	+	PPFIBP1	protein_coding	973.771	1.09355	0.163336	6.69511	2.15504e-11	3.19925e-10
ENSG00000110344	11	118359585	118399211	+	UBE4A	protein_coding	1542.67	-1.36061	0.203266	-6.69371	2.1758e-11	3.2275e-10
ENSG00000142409	19	56087366	56121295	-	ZNF787	protein_coding	311.453	1.60236	0.239409	6.69295	2.18714e-11	3.24172e-10
ENSG00000158234	3	138608606	138633376	+	FAIM	protein_coding	323.818	-1.61127	0.24077	-6.69215	2.1992e-11	3.257e-10
ENSG00000138381	2	189661385	189670831	+	ASNSD1	protein_coding	222.104	-1.82185	0.272271	-6.6913	2.21197e-11	3.27329e-10
ENSG00000116273	1	6613731	6624030	+	PHF13	protein_coding	178.627	2.04763	0.306047	6.69059	2.2227e-11	3.28654e-10
ENSG00000170903	11	105995623	106022403	-	MSANTD4	protein_coding	334.842	-1.63166	0.243926	-6.68913	2.24501e-11	3.31689e-10
ENSG00000116670	1	11674480	11691650	-	MAD2L2	protein_coding	131.85	1.71931	0.257083	6.68777	2.26597e-11	3.34519e-10
ENSG00000163806	2	28782517	28850611	+	SPDYA	protein_coding	65.2742	2.64446	0.395428	6.68758	2.26897e-11	3.34696e-10
ENSG00000234678	1	201995696	202010463	-	ELF3-AS1	lncRNA	203.238	-2.10779	0.315373	-6.6835	2.33306e-11	3.43876e-10
ENSG00000198060	10	92291167	92353964	+	MARCHF5	protein_coding	970.732	1.2568	0.188055	6.68316	2.33836e-11	3.44384e-10
ENSG00000033867	3	27372721	27484420	-	SLC4A7	protein_coding	1472.16	1.33606	0.199951	6.68195	2.35789e-11	3.46985e-10
ENSG00000163435	1	202007945	202017183	+	ELF3	protein_coding	5634.63	1.47101	0.220187	6.68073	2.37757e-11	3.49603e-10
ENSG00000287189	6	166309572	166317470	+	AL121956.6	lncRNA	556.105	-1.5888	0.23802	-6.67508	2.47105e-11	3.6306e-10
ENSG00000092330	14	24239643	24242674	-	TINF2	protein_coding	616.286	1.1979	0.179467	6.67475	2.47656e-11	3.63581e-10
ENSG00000101493	18	76357682	76495242	-	ZNF516	protein_coding	643.301	1.44218	0.21609	6.674	2.48929e-11	3.65162e-10
ENSG00000112335	6	108211222	108261246	-	SNX3	protein_coding	1961.17	1.25989	0.188798	6.67318	2.50326e-11	3.6692e-10
ENSG00000135862	1	183023420	183145592	+	LAMC1	protein_coding	1547.84	1.7721	0.265564	6.67299	2.50649e-11	3.67063e-10
ENSG00000174007	3	196706277	196712250	-	CEP19	protein_coding	168.947	-1.30344	0.195334	-6.67289	2.50819e-11	3.67063e-10
ENSG00000163602	3	72371825	72446621	-	RYBP	protein_coding	628.912	1.28908	0.193195	6.67243	2.51596e-11	3.6791e-10
ENSG00000155189	8	6708642	6761503	+	AGPAT5	protein_coding	554.366	-1.31788	0.197517	-6.67224	2.51922e-11	3.68096e-10
ENSG00000198429	19	11887782	11914329	+	ZNF69	protein_coding	60.1572	-3.00845	0.450903	-6.67207	2.52217e-11	3.68237e-10
ENSG00000140463	15	72686179	72738475	+	BBS4	protein_coding	883.114	-1.29409	0.193972	-6.67152	2.53163e-11	3.69327e-10
ENSG00000103126	16	287440	352723	-	AXIN1	protein_coding	286.449	1.9637	0.294428	6.66956	2.56576e-11	3.74012e-10
ENSG00000171124	19	5842888	5851474	-	FUT3	protein_coding	1521.56	1.93438	0.290207	6.66553	2.63706e-11	3.84103e-10
ENSG00000169016	2	11444375	11466177	-	E2F6	protein_coding	133.95	-1.46862	0.220344	-6.6651	2.64492e-11	3.84946e-10
ENSG00000047932	6	117560269	117602542	-	GOPC	protein_coding	703.22	-1.14173	0.17131	-6.6647	2.65199e-11	3.85473e-10
ENSG00000136238	7	6374527	6403967	+	RAC1	protein_coding	6699.61	1.07333	0.161047	6.66466	2.6527e-11	3.85473e-10
ENSG00000068784	2	45388680	45612165	-	SRBD1	protein_coding	290.613	-1.50047	0.225221	-6.6622	2.69753e-11	3.9168e-10
ENSG00000137959	1	78619922	78646145	+	IFI44L	protein_coding	1312.95	-5.58885	0.838987	-6.66143	2.71182e-11	3.93447e-10
ENSG00000066084	12	50504985	50748657	+	DIP2B	protein_coding	988.8	1.30736	0.196305	6.65984	2.74134e-11	3.97109e-10
ENSG00000106049	7	27525442	27662883	-	HIBADH	protein_coding	1156.34	0.926138	0.139062	6.6599	2.74016e-11	3.97109e-10
ENSG00000251615	4	8355090	8358338	-	AC104825.1	lncRNA	118.8	-2.66188	0.399836	-6.65743	2.78648e-11	4.03333e-10
ENSG00000185745	10	89392546	89406487	+	IFIT1	protein_coding	3376.98	-4.94072	0.742195	-6.6569	2.79657e-11	4.04477e-10
ENSG00000166704	19	57977053	58003349	-	ZNF606	protein_coding	291.884	-1.50073	0.225498	-6.65517	2.82974e-11	4.08955e-10
ENSG00000165997	10	18659431	18681639	+	ARL5B	protein_coding	1399.74	1.23315	0.185306	6.65468	2.83923e-11	4.10008e-10
ENSG00000278053	17	37609739	37643446	-	DDX52	protein_coding	667.889	-1.30896	0.196721	-6.65387	2.85476e-11	4.11929e-10
ENSG00000141642	18	50967991	50988121	+	ELAC1	protein_coding	80.7867	-2.77042	0.416397	-6.65332	2.86562e-11	4.13175e-10
ENSG00000163735	4	73995642	73998677	-	CXCL5	protein_coding	155.287	-5.14379	0.77346	-6.65036	2.92377e-11	4.21232e-10
ENSG00000111897	6	122443351	122471807	-	SERINC1	protein_coding	3119.06	1.10026	0.165506	6.64783	2.97446e-11	4.28203e-10
ENSG00000185122	8	144291591	144314720	+	HSF1	protein_coding	648.857	1.86515	0.280574	6.6476	2.97909e-11	4.28537e-10
ENSG00000180304	15	64687573	64703281	-	OAZ2	protein_coding	656.205	-1.10004	0.165489	-6.6472	2.98719e-11	4.29368e-10
ENSG00000139618	13	32315086	32400266	+	BRCA2	protein_coding	106.583	-3.27582	0.493073	-6.64369	3.05931e-11	4.39394e-10
ENSG00000111877	6	118813442	118935162	-	MCM9	protein_coding	181.846	-1.46109	0.219933	-6.64337	3.0659e-11	4.4e-10
ENSG00000165309	10	22928024	23038523	+	ARMC3	protein_coding	4569.36	-1.29843	0.195452	-6.64324	3.06853e-11	4.40036e-10
ENSG00000145388	4	118685392	118715433	+	METTL14	protein_coding	677.051	-1.25978	0.18967	-6.64198	3.09503e-11	4.43494e-10
ENSG00000261366	6	95575183	95577450	-	MANEA-DT	lncRNA	25.7824	-3.89251	0.58652	-6.63662	3.20962e-11	4.59558e-10
ENSG00000204428	6	31676684	31684040	-	LY6G5C	protein_coding	32.2949	-3.72708	0.561742	-6.63486	3.24811e-11	4.6471e-10
ENSG00000145632	5	58453982	58460139	-	PLK2	protein_coding	2627.21	-2.30541	0.347809	-6.62837	3.39404e-11	4.85214e-10
ENSG00000143390	1	151340640	151347357	-	RFX5	protein_coding	529.096	-1.24909	0.188465	-6.6277	3.40949e-11	4.87047e-10
ENSG00000106701	9	105447796	105552433	+	FSD1L	protein_coding	339.976	-1.52369	0.230013	-6.62435	3.48784e-11	4.97856e-10
ENSG00000137760	11	107502726	107565746	-	ALKBH8	protein_coding	180.349	-2.57622	0.389266	-6.61815	3.63725e-11	5.18784e-10
ENSG00000272316	6	57908560	57913911	-	AL021368.2	lncRNA	63.8327	-2.9491	0.445997	-6.61238	3.78195e-11	5.39008e-10
ENSG00000100219	22	28794555	28800597	-	XBP1	protein_coding	9721.16	-1.11888	0.169222	-6.61191	3.7939e-11	5.40295e-10
ENSG00000164961	8	125024260	125091819	-	WASHC5	protein_coding	652.197	-0.997577	0.150889	-6.61133	3.80892e-11	5.42018e-10
ENSG00000135018	9	83659968	83707958	-	UBQLN1	protein_coding	1470.45	1.3327	0.201692	6.60763	3.90532e-11	5.5531e-10
ENSG00000149308	11	108157215	108222638	-	NPAT	protein_coding	589.317	-1.73936	0.26332	-6.60549	3.962e-11	5.62938e-10
ENSG00000136754	10	26746593	26861087	-	ABI1	protein_coding	2734.85	1.10887	0.167904	6.6042	3.99658e-11	5.67416e-10
ENSG00000143376	1	151612006	151699091	+	SNX27	protein_coding	565.091	1.72261	0.260863	6.60349	4.01586e-11	5.69718e-10
ENSG00000175203	12	57530102	57547331	-	DCTN2	protein_coding	1254.36	1.02726	0.155573	6.60304	4.02805e-11	5.71009e-10
ENSG00000182831	16	9091644	9121635	+	C16orf72	protein_coding	1019.28	1.38952	0.210455	6.60246	4.04396e-11	5.72827e-10
ENSG00000173153	11	64305497	64316743	+	ESRRA	protein_coding	904.839	1.41409	0.214314	6.59822	4.16131e-11	5.89e-10
ENSG00000162396	1	54756898	54764523	-	PARS2	protein_coding	44.0922	-3.6309	0.550517	-6.59544	4.23996e-11	5.99674e-10
ENSG00000166596	17	9576627	9643447	+	CFAP52	protein_coding	2212.38	-1.1837	0.17948	-6.59516	4.24795e-11	5.9989e-10
ENSG00000187187	19	39984134	40021038	+	ZNF546	protein_coding	99.1132	-2.8605	0.433721	-6.59526	4.24523e-11	5.9989e-10
ENSG00000144061	2	110122311	110205066	-	NPHP1	protein_coding	2357.4	-1.31478	0.199403	-6.59358	4.29356e-11	6.05869e-10
ENSG00000197712	4	38867677	38945739	+	FAM114A1	protein_coding	1196.45	1.63195	0.247527	6.59301	4.30992e-11	6.07715e-10
ENSG00000140259	15	43804492	43824690	-	MFAP1	protein_coding	1194.71	-1.50376	0.228096	-6.59268	4.31966e-11	6.08626e-10
ENSG00000138755	4	76001275	76007509	-	CXCL9	protein_coding	38.5785	-8.12339	1.23238	-6.59162	4.35063e-11	6.12524e-10
ENSG00000010017	6	13621498	13711835	-	RANBP9	protein_coding	627.353	1.32995	0.201831	6.58943	4.41528e-11	6.21154e-10
ENSG00000115310	2	54972187	55112621	-	RTN4	protein_coding	2976.61	0.936666	0.142178	6.58797	4.45879e-11	6.26799e-10
ENSG00000271643	3	33793644	33798539	-	AC112220.2	lncRNA	106.427	-2.64454	0.401573	-6.58544	4.53544e-11	6.37092e-10
ENSG00000196345	3	44555193	44594173	+	ZKSCAN7	protein_coding	56.7123	-3.5403	0.537613	-6.58523	4.54194e-11	6.37522e-10
ENSG00000055147	5	153990148	154038936	-	FAM114A2	protein_coding	390.413	-1.38094	0.209797	-6.58226	4.63342e-11	6.4987e-10
ENSG00000130312	19	17292609	17306843	+	MRPL34	protein_coding	368.82	1.56213	0.237466	6.57835	4.75699e-11	6.66697e-10
ENSG00000130158	19	11199295	11262524	-	DOCK6	protein_coding	555.182	1.71437	0.260638	6.57758	4.78173e-11	6.69659e-10
ENSG00000126458	19	49635292	49640143	-	RRAS	protein_coding	602.149	2.0075	0.305213	6.57735	4.78892e-11	6.70159e-10
ENSG00000127720	12	82358528	82479239	+	METTL25	protein_coding	83.1806	-1.96475	0.298801	-6.57545	4.85063e-11	6.78283e-10
ENSG00000131507	5	142108779	142154440	+	NDFIP1	protein_coding	1425.52	1.43971	0.218958	6.57528	4.85607e-11	6.78532e-10
ENSG00000171735	1	6785454	7769706	+	CAMTA1	protein_coding	412.825	1.08462	0.1651	6.56947	5.04936e-11	7.0501e-10
ENSG00000166848	16	75647773	75761872	+	TERF2IP	protein_coding	465.274	1.85368	0.2822	6.56868	5.07637e-11	7.08247e-10
ENSG00000177666	11	818914	825573	+	PNPLA2	protein_coding	623.102	1.78091	0.271155	6.56785	5.10461e-11	7.11651e-10
ENSG00000128294	22	26521996	26596717	-	TPST2	protein_coding	441.365	1.41392	0.215408	6.56392	5.24096e-11	7.30112e-10
ENSG00000167840	17	5105541	5123116	-	ZNF232	protein_coding	247.59	-1.72309	0.262557	-6.56271	5.28376e-11	7.35522e-10
ENSG00000259925	16	19343647	19401693	-	AC130456.2	lncRNA	123.97	-1.90832	0.290954	-6.55883	5.42313e-11	7.54356e-10
ENSG00000197168	13	52033611	52129092	-	NEK5	protein_coding	951.365	-1.45785	0.22228	-6.55864	5.43024e-11	7.54779e-10
ENSG00000127955	7	79768028	80226181	+	GNAI1	protein_coding	1146.1	1.20089	0.183106	6.55847	5.43624e-11	7.55047e-10
ENSG00000240602	3	151770428	151784894	+	AADACP1	transcribed_unprocessed_pseudogene	154.011	-2.53694	0.38695	-6.55626	5.51749e-11	7.65758e-10
ENSG00000185684	12	132084283	132131639	+	EP400P1	transcribed_unprocessed_pseudogene	179.684	-1.92522	0.293689	-6.55529	5.55343e-11	7.7017e-10
ENSG00000188817	3	63652675	63679020	+	SNTN	protein_coding	3428.85	-1.27873	0.195072	-6.55517	5.55768e-11	7.70183e-10
ENSG00000286545	2	112239621	112244375	+	AC092645.2	lncRNA	35.0271	-4.14609	0.632763	-6.55236	5.66342e-11	7.84251e-10
ENSG00000159658	1	46675159	46719114	-	EFCAB14	protein_coding	1947.24	1.23375	0.188306	6.55182	5.68408e-11	7.86524e-10
ENSG00000138829	5	128257909	128659185	-	FBN2	protein_coding	82.6213	-3.55515	0.542699	-6.55087	5.72041e-11	7.90961e-10
ENSG00000141854	19	14072536	14075062	+	MISP3	protein_coding	148.271	1.80565	0.275686	6.54968	5.76587e-11	7.96652e-10
ENSG00000164187	5	36098407	36151887	-	LMBRD2	protein_coding	671.914	-1.3719	0.209547	-6.54701	5.87019e-11	8.10461e-10
ENSG00000167302	17	81228277	81239091	-	TEPSIN	protein_coding	60.0401	-2.96548	0.453036	-6.5458	5.91781e-11	8.16429e-10
ENSG00000229832	1	212357418	212358353	+	AL360091.1	lncRNA	18.4361	5.03481	0.769303	6.54463	5.96413e-11	8.22207e-10
ENSG00000051620	6	138403531	138422197	+	HEBP2	protein_coding	1723.06	0.98535	0.150562	6.54446	5.97098e-11	8.2254e-10
ENSG00000273142	7	66902857	66906297	+	LINC02604	lncRNA	175.602	-1.97455	0.301788	-6.54284	6.03606e-11	8.30888e-10
ENSG00000021776	15	34851782	34969742	-	AQR	protein_coding	1840.25	-1.39709	0.213604	-6.54054	6.12973e-11	8.43157e-10
ENSG00000101187	20	62642503	62685785	+	SLCO4A1	protein_coding	88.1612	3.43233	0.524806	6.54018	6.14444e-11	8.44553e-10
ENSG00000145908	5	150894392	150904983	-	ZNF300	protein_coding	334.672	-2.44737	0.374257	-6.53926	6.18221e-11	8.49115e-10
ENSG00000180881	12	75275979	75390928	-	CAPS2	protein_coding	1207.11	-1.50442	0.230182	-6.5358	6.32712e-11	8.68376e-10
ENSG00000164823	8	89901849	89927888	+	OSGIN2	protein_coding	882.551	1.16479	0.178241	6.53491	6.36486e-11	8.72908e-10
ENSG00000256087	19	52031378	52095738	-	ZNF432	protein_coding	631.013	-1.20873	0.185008	-6.53336	6.43105e-11	8.81334e-10
ENSG00000104695	8	30774457	30814314	-	PPP2CB	protein_coding	1861.81	0.927786	0.142088	6.52966	6.59188e-11	9.02708e-10
ENSG00000198521	19	21804949	21852125	-	ZNF43	protein_coding	228.645	-1.56723	0.240151	-6.52604	6.75321e-11	9.24118e-10
ENSG00000284138	1	42952202	42952641	-	ATP6V0CP4	processed_pseudogene	37.1794	3.43025	0.52591	6.52251	6.91423e-11	9.45455e-10
ENSG00000070770	16	58157907	58198106	-	CSNK2A2	protein_coding	303.903	1.66399	0.255185	6.52072	6.99685e-11	9.56048e-10
ENSG00000110108	11	60914158	60923443	+	TMEM109	protein_coding	631.485	1.71159	0.262508	6.52016	7.02339e-11	9.58967e-10
ENSG00000163082	2	222424543	222562621	+	SGPP2	protein_coding	1200.96	1.74773	0.268088	6.51925	7.06581e-11	9.6334e-10
ENSG00000231770	3	194584004	194590260	+	TMEM44-AS1	lncRNA	61.8515	-4.03929	0.61959	-6.5193	7.06346e-11	9.6334e-10
ENSG00000126858	17	32142454	32253374	+	RHOT1	protein_coding	667.865	0.999004	0.153254	6.51861	7.09603e-11	9.6675e-10
ENSG00000114670	3	131026850	131350465	+	NEK11	protein_coding	1886.2	-1.39749	0.214422	-6.51746	7.15058e-11	9.73465e-10
ENSG00000104783	19	43766533	43781257	-	KCNN4	protein_coding	163.324	2.16149	0.331802	6.51439	7.29845e-11	9.92867e-10
ENSG00000129048	3	132597270	132618967	+	ACKR4	protein_coding	124.165	-2.37943	0.365341	-6.51289	7.37207e-11	1.00215e-09
ENSG00000134152	15	34140674	34210096	-	KATNBL1	protein_coding	797.473	0.977019	0.150117	6.5084	7.5957e-11	1.03143e-09
ENSG00000170871	4	6781375	6884170	+	KIAA0232	protein_coding	1624.27	-0.990209	0.152145	-6.50834	7.59863e-11	1.03143e-09
ENSG00000117308	1	23795599	23800781	-	GALE	protein_coding	1114.83	1.08889	0.167311	6.50815	7.6081e-11	1.03196e-09
ENSG00000033327	11	78215293	78418348	-	GAB2	protein_coding	137.903	1.90862	0.293278	6.50788	7.62175e-11	1.03306e-09
ENSG00000157881	1	2508537	2526611	-	PANK4	protein_coding	252.154	1.29186	0.198609	6.50454	7.79292e-11	1.05549e-09
ENSG00000136108	13	52455429	52476628	+	CKAP2	protein_coding	807.11	-1.85928	0.28586	-6.50415	7.81338e-11	1.05749e-09
ENSG00000047249	8	53715543	53843558	-	ATP6V1H	protein_coding	1121.81	0.987791	0.15188	6.50376	7.83356e-11	1.05867e-09
ENSG00000119669	14	77024543	77028708	-	IRF2BPL	protein_coding	430.17	2.43652	0.374632	6.50377	7.83326e-11	1.05867e-09
ENSG00000157020	3	10293131	10321112	-	SEC13	protein_coding	965.657	1.05938	0.162917	6.50259	7.89481e-11	1.06617e-09
ENSG00000226608	20	4023917	4024444	+	FTLP3	processed_pseudogene	33.5543	2.29492	0.352965	6.50185	7.93366e-11	1.07064e-09
ENSG00000138380	2	202912214	202988263	+	CARF	protein_coding	346.2	-1.61519	0.248447	-6.50117	7.96962e-11	1.07471e-09
ENSG00000157992	2	27442366	27446481	+	KRTCAP3	protein_coding	228.09	1.1312	0.174011	6.50077	7.99107e-11	1.07682e-09
ENSG00000104356	8	98117293	98159835	+	POP1	protein_coding	204.16	-1.87251	0.288095	-6.49961	8.05259e-11	1.08432e-09
ENSG00000168876	11	94493979	94499578	+	ANKRD49	protein_coding	358.394	-1.74621	0.2687	-6.49874	8.09975e-11	1.08988e-09
ENSG00000124532	6	24402908	24426194	+	MRS2	protein_coding	678.692	-1.51679	0.233422	-6.49804	8.13714e-11	1.09412e-09
ENSG00000145050	3	51385291	51389397	+	MANF	protein_coding	567.982	1.39847	0.215238	6.49732	8.17656e-11	1.09862e-09
ENSG00000178951	19	4043303	4066899	-	ZBTB7A	protein_coding	1088.52	1.75204	0.269864	6.49233	8.45203e-11	1.13481e-09
ENSG00000163399	1	116372668	116410261	+	ATP1A1	protein_coding	4372.91	1.73078	0.26661	6.49182	8.48046e-11	1.13781e-09
ENSG00000146776	7	105605067	105876604	-	ATXN7L1	protein_coding	129.293	-1.87998	0.289706	-6.48929	8.62399e-11	1.15623e-09
ENSG00000141568	17	82519713	82644662	+	FOXK2	protein_coding	518.553	1.12623	0.173569	6.48865	8.66114e-11	1.16037e-09
ENSG00000152443	19	57746815	57758148	+	ZNF776	protein_coding	164.369	-2.44918	0.377517	-6.48758	8.7225e-11	1.16774e-09
ENSG00000113966	3	97764521	97801229	+	ARL6	protein_coding	827.437	-1.50789	0.23254	-6.48444	8.90606e-11	1.19146e-09
ENSG00000152193	13	78614289	78659155	-	OBI1	protein_coding	198.195	-1.71341	0.264326	-6.48219	9.04002e-11	1.20851e-09
ENSG00000172765	3	129647792	129893606	-	TMCC1	protein_coding	763.853	1.08086	0.166757	6.48165	9.07254e-11	1.21198e-09
ENSG00000110497	11	46396414	46594125	-	AMBRA1	protein_coding	316.851	1.41827	0.218962	6.47724	9.3414e-11	1.247e-09
ENSG00000187758	4	99276369	99291003	-	ADH1A	protein_coding	28.1694	-5.19427	0.802195	-6.47506	9.47727e-11	1.26423e-09
ENSG00000168116	6	57046532	57055239	+	KIAA1586	protein_coding	97.6828	-2.57415	0.397632	-6.4737	9.56312e-11	1.27476e-09
ENSG00000182054	15	90083045	90102504	-	IDH2	protein_coding	2560.09	1.21309	0.187422	6.47253	9.63782e-11	1.2838e-09
ENSG00000169100	X	1386152	1392113	-	SLC25A6	protein_coding	2550.62	1.73874	0.268706	6.47081	9.7481e-11	1.29755e-09
ENSG00000176641	18	61808067	61894247	-	RNF152	protein_coding	603.106	1.47946	0.228694	6.46916	9.85463e-11	1.31079e-09
ENSG00000110583	11	63938959	63957319	+	NAA40	protein_coding	505.196	-1.23165	0.190419	-6.46809	9.92462e-11	1.31916e-09
ENSG00000204519	19	57681969	57717301	+	ZNF551	protein_coding	121.682	-2.81933	0.436202	-6.46335	1.02412e-10	1.36026e-09
ENSG00000171552	20	31664452	31723989	-	BCL2L1	protein_coding	1934.98	1.61275	0.249543	6.4628	1.02782e-10	1.36419e-09
ENSG00000269001	19	53197111	53214522	+	AC092070.2	transcribed_unprocessed_pseudogene	223.956	-2.39802	0.371119	-6.4616	1.036e-10	1.37406e-09
ENSG00000165195	X	15319451	15335580	-	PIGA	protein_coding	718.684	1.23234	0.190789	6.45918	1.05271e-10	1.39523e-09
ENSG00000124613	6	27374615	27403904	+	ZNF391	protein_coding	159.799	-1.87841	0.290828	-6.45883	1.05517e-10	1.3975e-09
ENSG00000233834	7	20217577	20221700	+	AC005083.1	lncRNA	206.128	-1.93566	0.299831	-6.45584	1.07623e-10	1.42438e-09
ENSG00000162377	1	52684449	52698347	-	COA7	protein_coding	171.725	-2.50678	0.388481	-6.45277	1.09825e-10	1.45248e-09
ENSG00000050393	6	13786557	13814568	-	MCUR1	protein_coding	352.251	1.2637	0.195854	6.45228	1.10182e-10	1.45616e-09
ENSG00000159023	1	28887091	29120046	+	EPB41	protein_coding	714.981	1.03215	0.159992	6.45121	1.10958e-10	1.46537e-09
ENSG00000179262	19	12945855	12953642	+	RAD23A	protein_coding	374.202	1.71459	0.265807	6.45049	1.11488e-10	1.47132e-09
ENSG00000180423	11	46602861	46617909	-	HARBI1	protein_coding	93.3069	-1.5801	0.245003	-6.44933	1.12348e-10	1.48162e-09
ENSG00000150756	5	10225507	10249897	-	ATPSCKMT	protein_coding	310.51	-1.60032	0.248197	-6.44776	1.13513e-10	1.49592e-09
ENSG00000159346	1	202940826	202958572	-	ADIPOR1	protein_coding	4858.39	0.95769	0.148542	6.44726	1.1389e-10	1.49982e-09
ENSG00000171806	1	169792529	169794963	-	METTL18	protein_coding	113.921	-3.18387	0.493908	-6.44629	1.14621e-10	1.50837e-09
ENSG00000132670	20	2864184	3039076	+	PTPRA	protein_coding	989.865	1.15653	0.179444	6.44506	1.15557e-10	1.51962e-09
ENSG00000096060	6	35573585	35728583	-	FKBP5	protein_coding	268.929	1.55938	0.241981	6.44421	1.16207e-10	1.52707e-09
ENSG00000163710	3	142815922	142889206	-	PCOLCE2	protein_coding	24.8239	3.97913	0.617901	6.43975	1.19671e-10	1.57149e-09
ENSG00000258699	14	89355060	89356571	+	AL357093.1	lncRNA	37.845	-4.27436	0.663833	-6.43891	1.20338e-10	1.57913e-09
ENSG00000119048	5	134371469	134392108	+	UBE2B	protein_coding	1004.23	0.909311	0.141233	6.43835	1.2078e-10	1.5838e-09
ENSG00000166145	15	40844018	40858207	+	SPINT1	protein_coding	3271.79	2.31723	0.35992	6.43817	1.20925e-10	1.58458e-09
ENSG00000156049	9	77423079	77648322	-	GNA14	protein_coding	344.763	-1.20314	0.186888	-6.43773	1.21277e-10	1.58808e-09
ENSG00000170791	8	56211686	56218809	+	CHCHD7	protein_coding	511.291	-1.41006	0.21907	-6.43658	1.22192e-10	1.59781e-09
ENSG00000196700	20	63956704	63969930	-	ZNF512B	protein_coding	187.674	-2.28451	0.354922	-6.43664	1.22146e-10	1.59781e-09
ENSG00000247626	2	197705369	197708395	+	MARS2	protein_coding	156.901	-1.5274	0.237323	-6.43597	1.22684e-10	1.60311e-09
ENSG00000138035	2	55634061	55693863	-	PNPT1	protein_coding	1119.01	-1.51193	0.234923	-6.43585	1.22788e-10	1.60334e-09
ENSG00000178988	4	6707701	6709865	-	MRFAP1L1	protein_coding	1764.15	-1.37119	0.213155	-6.4328	1.25275e-10	1.63466e-09
ENSG00000147041	X	38006553	38128819	+	SYTL5	protein_coding	1754.88	-1.51787	0.235975	-6.43234	1.25656e-10	1.63847e-09
ENSG00000159445	1	151870866	151909637	-	THEM4	protein_coding	154.752	-1.79137	0.278603	-6.42984	1.27739e-10	1.66447e-09
ENSG00000119392	9	128504700	128542288	+	GLE1	protein_coding	777.826	-1.36738	0.212707	-6.42844	1.28918e-10	1.67865e-09
ENSG00000260183	16	80547842	80552514	-	AC108097.1	lncRNA	29.7474	-4.7629	0.741104	-6.42676	1.30352e-10	1.69613e-09
ENSG00000213976	19	21382865	21387177	+	AC010615.1	unprocessed_pseudogene	43.1055	-4.77488	0.743616	-6.42116	1.35242e-10	1.75853e-09
ENSG00000261338	2	218255319	218257366	+	AC021016.2	lncRNA	59.492	-3.60821	0.561941	-6.42097	1.35411e-10	1.75949e-09
ENSG00000169241	1	155135344	155138857	+	SLC50A1	protein_coding	728.005	1.32675	0.206632	6.42083	1.35535e-10	1.75987e-09
ENSG00000162415	1	45016399	45306209	-	ZSWIM5	protein_coding	19.9924	-6.79281	1.05799	-6.4205	1.35827e-10	1.76242e-09
ENSG00000264247	18	74590317	74598885	-	LINC00909	lncRNA	93.4148	-3.68938	0.574676	-6.41994	1.36327e-10	1.76767e-09
ENSG00000229852	6	73263212	73301789	+	AC019205.1	lncRNA	29.3097	-5.28883	0.823843	-6.41971	1.36537e-10	1.76917e-09
ENSG00000071051	2	105744912	105894274	+	NCK2	protein_coding	455.182	1.69044	0.263381	6.41823	1.37872e-10	1.78521e-09
ENSG00000164073	4	127917732	127966034	-	MFSD8	protein_coding	313.869	-1.47948	0.230579	-6.41636	1.39575e-10	1.806e-09
ENSG00000272144	5	43061395	43062441	+	AC025171.4	lncRNA	16.0984	-6.9051	1.07651	-6.41437	1.41408e-10	1.82844e-09
ENSG00000105373	19	47745546	47757058	+	NOP53	protein_coding	1135.63	1.64087	0.255849	6.41344	1.4227e-10	1.83831e-09
ENSG00000197044	19	11767000	11784078	+	ZNF441	protein_coding	140.651	-2.25107	0.351014	-6.41306	1.42629e-10	1.84167e-09
ENSG00000100814	14	20311368	20333312	-	CCNB1IP1	protein_coding	512.711	1.47205	0.229619	6.41084	1.44719e-10	1.86475e-09
ENSG00000144736	3	72749277	72861914	-	SHQ1	protein_coding	529.749	-1.19027	0.185663	-6.41092	1.44645e-10	1.86475e-09
ENSG00000197961	19	9560353	9584533	-	ZNF121	protein_coding	852.06	1.07702	0.167997	6.41094	1.44624e-10	1.86475e-09
ENSG00000112039	6	35452338	35467102	+	FANCE	protein_coding	131.099	2.75302	0.429538	6.40926	1.46229e-10	1.88291e-09
ENSG00000240207	3	158732263	158784070	+	AC080013.1	lncRNA	52.8362	-3.29151	0.513738	-6.40698	1.4843e-10	1.90992e-09
ENSG00000156299	21	31118416	31559977	-	TIAM1	protein_coding	361.792	1.84222	0.28757	6.40618	1.49212e-10	1.91865e-09
ENSG00000166206	15	26543546	26939539	-	GABRB3	protein_coding	356.054	-2.90351	0.453362	-6.40438	1.50979e-10	1.94003e-09
ENSG00000117593	1	173824653	173858808	+	DARS2	protein_coding	604.366	-1.24991	0.195187	-6.40366	1.51692e-10	1.94784e-09
ENSG00000164916	7	4682295	4771442	+	FOXK1	protein_coding	570.532	1.55792	0.243303	6.40321	1.52147e-10	1.95232e-09
ENSG00000175054	3	142449007	142578733	-	ATR	protein_coding	1860.14	-1.17282	0.183199	-6.40187	1.53488e-10	1.96816e-09
ENSG00000204271	X	56818298	56995827	-	SPIN3	protein_coding	175.05	-1.79711	0.280774	-6.40056	1.54803e-10	1.98366e-09
ENSG00000164929	8	103140713	103230305	+	BAALC	protein_coding	222.082	-2.78489	0.435194	-6.39918	1.56209e-10	1.99892e-09
ENSG00000218416	2	240449315	240456714	-	AC110619.1	lncRNA	136.927	-2.48373	0.388129	-6.39924	1.56152e-10	1.99892e-09
ENSG00000068878	2	53864069	53970993	-	PSME4	protein_coding	2296.96	0.870089	0.13601	6.39726	1.58195e-10	2.02293e-09
ENSG00000276023	17	37489891	37513501	+	DUSP14	protein_coding	1065.69	-1.28832	0.201476	-6.39441	1.61168e-10	2.05953e-09
ENSG00000164211	5	111496033	111512590	-	STARD4	protein_coding	1202.29	1.66385	0.260327	6.39137	1.64409e-10	2.09949e-09
ENSG00000157330	1	12746200	12763699	+	C1orf158	protein_coding	484.002	-1.4953	0.233989	-6.39047	1.65376e-10	2.11039e-09
ENSG00000179335	15	74598500	74645414	+	CLK3	protein_coding	811.084	1.22932	0.192372	6.39032	1.65538e-10	2.111e-09
ENSG00000166750	17	35243071	35273655	+	SLFN5	protein_coding	3548.97	-1.31195	0.205326	-6.38961	1.66311e-10	2.11941e-09
ENSG00000134716	1	59893308	59926773	-	CYP2J2	protein_coding	350.605	-1.74644	0.273332	-6.38946	1.66477e-10	2.12007e-09
ENSG00000177692	21	33485530	33491720	-	DNAJC28	protein_coding	32.2137	-5.02482	0.786437	-6.38934	1.66599e-10	2.12016e-09
ENSG00000121903	1	33472645	33496507	+	ZSCAN20	protein_coding	47.6311	-4.73183	0.740887	-6.38671	1.69494e-10	2.15552e-09
ENSG00000269559	4	74156511	74158373	-	AC093677.2	lncRNA	14.4901	-6.9451	1.088	-6.38335	1.73258e-10	2.20189e-09
ENSG00000122435	1	100133150	100150498	+	TRMT13	protein_coding	329.315	-1.59519	0.249935	-6.38242	1.74311e-10	2.21376e-09
ENSG00000097021	1	6264269	6394391	-	ACOT7	protein_coding	929.74	1.55383	0.243476	6.38185	1.74963e-10	2.22052e-09
ENSG00000166959	11	60699585	60715807	+	MS4A8	protein_coding	2687.33	-1.40129	0.219582	-6.38161	1.75241e-10	2.22252e-09
ENSG00000166478	11	9460319	9528524	+	ZNF143	protein_coding	770.065	1.14469	0.179392	6.38094	1.75999e-10	2.2306e-09
ENSG00000119314	9	112217716	112333667	-	PTBP3	protein_coding	4556.98	1.05492	0.16533	6.38071	1.76273e-10	2.23256e-09
ENSG00000270127	15	100547765	100550153	-	AC027020.2	lncRNA	21.2738	-7.10541	1.11372	-6.37992	1.77184e-10	2.24255e-09
ENSG00000105640	19	17859910	17864153	+	RPL18A	protein_coding	9152.87	1.6183	0.25369	6.37904	1.78203e-10	2.25392e-09
ENSG00000066923	7	100177563	100221488	+	STAG3	protein_coding	188.2	-2.00261	0.314141	-6.37487	1.83124e-10	2.31458e-09
ENSG00000115392	2	58159243	58241372	-	FANCL	protein_coding	361.272	-1.79007	0.2809	-6.37264	1.858e-10	2.3468e-09
ENSG00000079459	8	11795573	11839304	+	FDFT1	protein_coding	9130.65	1.60763	0.252281	6.37239	1.86107e-10	2.34907e-09
ENSG00000132953	13	20777329	20903048	-	XPO4	protein_coding	809.178	-1.56085	0.244984	-6.37122	1.87535e-10	2.36549e-09
ENSG00000148908	10	119499817	119542719	-	RGS10	protein_coding	300.017	1.46071	0.229277	6.37095	1.87866e-10	2.36805e-09
ENSG00000086200	5	62403972	62628582	+	IPO11	protein_coding	712.331	-1.2096	0.189904	-6.36952	1.89624e-10	2.38576e-09
ENSG00000115520	2	197453423	197475308	+	COQ10B	protein_coding	804.116	1.19144	0.187052	6.36954	1.8959e-10	2.38576e-09
ENSG00000166167	10	101354033	101557321	+	BTRC	protein_coding	714.762	-1.15411	0.181194	-6.36949	1.89657e-10	2.38576e-09
ENSG00000092529	15	42359498	42412949	+	CAPN3	protein_coding	106.657	-2.49687	0.392178	-6.36668	1.93158e-10	2.42816e-09
ENSG00000137575	8	58552924	58582859	+	SDCBP	protein_coding	6308.67	0.956893	0.150326	6.36546	1.94709e-10	2.44599e-09
ENSG00000175265	15	34379068	34437466	-	GOLGA8A	protein_coding	647.296	-1.51422	0.237982	-6.36275	1.98169e-10	2.48778e-09
ENSG00000198369	2	65310851	65432637	-	SPRED2	protein_coding	251.275	2.17627	0.342042	6.36256	1.9842e-10	2.48925e-09
ENSG00000271646	4	184474802	184477304	+	AC099343.4	lncRNA	35.1767	-3.65774	0.574915	-6.36224	1.98832e-10	2.49273e-09
ENSG00000176871	12	118032694	118062430	-	WSB2	protein_coding	1151.73	1.488	0.233921	6.36112	2.00293e-10	2.50934e-09
ENSG00000152778	10	89414568	89420997	+	IFIT5	protein_coding	827.661	-2.20423	0.346956	-6.35306	2.11068e-10	2.64256e-09
ENSG00000196263	19	56507850	56530221	+	ZNF471	protein_coding	250.179	-1.27897	0.201358	-6.35174	2.1289e-10	2.66357e-09
ENSG00000170348	14	75131469	75176612	-	TMED10	protein_coding	5165.47	0.659644	0.103857	6.35146	2.13275e-10	2.66658e-09
ENSG00000138231	3	138160988	138174921	-	DBR1	protein_coding	166.733	-1.73507	0.273247	-6.34984	2.15537e-10	2.69306e-09
ENSG00000162775	1	110338506	110346681	+	RBM15	protein_coding	238.778	1.19831	0.188784	6.34751	2.18828e-10	2.73233e-09
ENSG00000198018	10	99659509	99711241	+	ENTPD7	protein_coding	1059.28	1.24504	0.196151	6.34736	2.19041e-10	2.73315e-09
ENSG00000182247	3	23203020	23591794	+	UBE2E2	protein_coding	251.39	1.67235	0.263533	6.3459	2.21129e-10	2.75734e-09
ENSG00000198440	19	56397966	56436035	+	ZNF583	protein_coding	48.6268	-4.15958	0.655513	-6.34554	2.21653e-10	2.76202e-09
ENSG00000102172	X	21940709	21994837	+	SMS	protein_coding	1335.41	0.939533	0.148074	6.34501	2.22408e-10	2.76958e-09
ENSG00000148680	10	90740823	90858039	-	HTR7	protein_coding	142.788	1.89382	0.298485	6.34476	2.22774e-10	2.77227e-09
ENSG00000131018	6	152121684	152637801	-	SYNE1	protein_coding	2189.87	-1.3071	0.20603	-6.34421	2.23574e-10	2.78036e-09
ENSG00000105993	7	157335381	157417439	+	DNAJB6	protein_coding	2820.23	0.809227	0.127575	6.34316	2.251e-10	2.79746e-09
ENSG00000146842	7	130164713	130207770	-	TMEM209	protein_coding	222.792	-1.17872	0.185928	-6.33966	2.30271e-10	2.8598e-09
ENSG00000115459	2	85354394	85391752	+	ELMOD3	protein_coding	412.505	-1.04162	0.164376	-6.33684	2.34524e-10	2.91068e-09
ENSG00000267102	17	35409602	35410228	-	AC060766.1	transcribed_processed_pseudogene	30.4614	-5.06413	0.799304	-6.33567	2.36317e-10	2.93097e-09
ENSG00000279059	17	54956760	54958426	-	AC007485.2	TEC	47.0193	-2.99588	0.472943	-6.33455	2.38041e-10	2.95037e-09
ENSG00000139826	13	108218392	108234243	+	ABHD13	protein_coding	717.705	-1.14066	0.180211	-6.32959	2.4582e-10	3.04476e-09
ENSG00000198954	10	68988721	69043544	+	KIFBP	protein_coding	554.043	-1.20235	0.189972	-6.32907	2.46643e-10	3.05291e-09
ENSG00000112167	6	39104063	39115186	-	SAYSD1	protein_coding	210.427	-1.33239	0.210573	-6.32746	2.49222e-10	3.08278e-09
ENSG00000213799	19	53333749	53356906	+	ZNF845	protein_coding	222.301	-1.81823	0.287481	-6.32468	2.53751e-10	3.1367e-09
ENSG00000159069	9	136940435	136944738	-	FBXW5	protein_coding	1053.98	1.34791	0.213159	6.32352	2.55666e-10	3.15826e-09
ENSG00000140941	16	87383953	87404779	+	MAP1LC3B	protein_coding	1635.3	1.24281	0.196559	6.32285	2.56788e-10	3.16791e-09
ENSG00000140961	16	83931311	83966332	+	OSGIN1	protein_coding	232.897	2.29177	0.362454	6.32291	2.56686e-10	3.16791e-09
ENSG00000148444	10	22316386	22320306	+	COMMD3	protein_coding	142.238	-1.83576	0.290351	-6.32256	2.57267e-10	3.17171e-09
ENSG00000143256	1	161100556	161118055	-	PFDN2	protein_coding	797.175	1.53815	0.243301	6.32202	2.5816e-10	3.1806e-09
ENSG00000163832	3	47495640	47513712	-	ELP6	protein_coding	278.168	-1.48862	0.235552	-6.31973	2.62018e-10	3.22599e-09
ENSG00000137168	6	36854827	36874803	-	PPIL1	protein_coding	622.565	-1.39669	0.221058	-6.31822	2.64597e-10	3.25558e-09
ENSG00000169714	3	129169484	129183922	-	CNBP	protein_coding	9400.89	1.38844	0.219951	6.31248	2.74595e-10	3.37635e-09
ENSG00000119661	14	73644875	73703732	+	DNAL1	protein_coding	1410.05	-0.929386	0.147257	-6.31133	2.76639e-10	3.39474e-09
ENSG00000142235	19	48485271	48513935	-	LMTK3	protein_coding	324.848	1.77708	0.281564	6.31145	2.76435e-10	3.39474e-09
ENSG00000197798	11	126211724	126262984	+	FAM118B	protein_coding	278.215	-1.32222	0.209497	-6.3114	2.76527e-10	3.39474e-09
ENSG00000232807	10	5934270	5945900	-	AL137186.2	lncRNA	13.5447	-6.78151	1.07453	-6.31116	2.76951e-10	3.39632e-09
ENSG00000223387	3	172560888	172595607	-	LINC02068	lncRNA	11.6608	-6.79881	1.07738	-6.31051	2.78118e-10	3.40837e-09
ENSG00000250803	5	122129622	122183949	+	AC010255.3	protein_coding	92.9694	-2.53238	0.40155	-6.30652	2.85388e-10	3.49516e-09
ENSG00000137070	9	34650702	34661892	+	IL11RA	protein_coding	29.9654	-5.29855	0.840324	-6.30536	2.87523e-10	3.51898e-09
ENSG00000096433	6	33620365	33696574	+	ITPR3	protein_coding	1325.35	1.59828	0.253514	6.30452	2.89094e-10	3.53484e-09
ENSG00000175582	11	73675638	73761137	-	RAB6A	protein_coding	1435.1	1.29122	0.204811	6.30446	2.892e-10	3.53484e-09
ENSG00000128602	7	129188633	129213545	+	SMO	protein_coding	118.462	-1.96829	0.312219	-6.30419	2.89713e-10	3.53734e-09
ENSG00000259225	15	37980676	38062340	+	LINC02345	lncRNA	314.864	-1.64891	0.26156	-6.30415	2.89787e-10	3.53734e-09
ENSG00000272668	1	159854870	159867685	+	AL590560.3	lncRNA	92.5187	-2.7963	0.443679	-6.30252	2.92846e-10	3.57234e-09
ENSG00000138678	4	83535914	83605875	+	GPAT3	protein_coding	72.9611	2.90719	0.461372	6.30118	2.95387e-10	3.60096e-09
ENSG00000146859	7	135148072	135166215	+	TMEM140	protein_coding	101.777	-3.12061	0.495278	-6.30072	2.9626e-10	3.60924e-09
ENSG00000278989	11	86434924	86437282	-	AP001148.1	TEC	17.9452	-6.77377	1.07569	-6.29713	3.03203e-10	3.6914e-09
ENSG00000130772	1	28329002	28335965	+	MED18	protein_coding	552.849	-1.51156	0.240045	-6.297	3.03466e-10	3.69216e-09
ENSG00000112308	6	24704861	24719998	-	C6orf62	protein_coding	831.662	-1.0331	0.164096	-6.29574	3.05941e-10	3.71984e-09
ENSG00000236859	2	121649320	121728563	+	NIFK-AS1	lncRNA	50.3798	-2.96887	0.47164	-6.29477	3.07856e-10	3.74067e-09
ENSG00000073921	11	85957175	86069882	-	PICALM	protein_coding	2573.1	0.990044	0.157327	6.29291	3.1156e-10	3.7832e-09
ENSG00000176273	10	93893973	93956062	+	SLC35G1	protein_coding	95.2755	-1.71777	0.273028	-6.29156	3.14295e-10	3.81391e-09
ENSG00000166024	10	98134624	98244897	+	R3HCC1L	protein_coding	430.696	-1.29091	0.205196	-6.29109	3.15239e-10	3.82287e-09
ENSG00000174502	1	205913048	205943460	-	SLC26A9	protein_coding	49.1804	4.06469	0.646137	6.29075	3.15935e-10	3.8288e-09
ENSG00000108244	17	40922700	40937646	-	KRT23	protein_coding	4300.98	1.55838	0.247877	6.28692	3.2383e-10	3.91935e-09
ENSG00000205930	21	32772100	32955437	+	C21orf62-AS1	lncRNA	44.9518	-2.92607	0.465423	-6.28692	3.23829e-10	3.91935e-09
ENSG00000284052	2	190607660	190649840	-	AC006460.2	lncRNA	17.3774	-6.86699	1.09249	-6.28564	3.26507e-10	3.94919e-09
ENSG00000140093	14	94280460	94293268	-	SERPINA10	protein_coding	13.7602	-6.84119	1.08857	-6.2846	3.28705e-10	3.97317e-09
ENSG00000248079	15	35546154	35860199	+	DPH6-DT	lncRNA	13.1301	-6.79468	1.08148	-6.28275	3.3263e-10	4.018e-09
ENSG00000197847	11	65213840	65242757	+	SLC22A20P	transcribed_unitary_pseudogene	50.2173	-4.32785	0.688939	-6.2819	3.34449e-10	4.03734e-09
ENSG00000105649	19	18196784	18204042	-	RAB3A	protein_coding	43.0335	3.77448	0.601079	6.2795	3.39653e-10	4.0975e-09
ENSG00000173208	12	39550033	39619803	-	ABCD2	protein_coding	69.8309	-2.41272	0.38429	-6.27838	3.42115e-10	4.12451e-09
ENSG00000159871	19	43785874	43827206	-	LYPD5	protein_coding	41.1321	2.53345	0.403528	6.27824	3.4242e-10	4.12551e-09
ENSG00000101084	20	36605779	36612557	+	RAB5IF	protein_coding	240.429	1.38681	0.220999	6.2752	3.49192e-10	4.20436e-09
ENSG00000202000	4	88000237	88000401	+	RNU1-36P	snRNA	13.9999	-6.91154	1.10182	-6.27283	3.5455e-10	4.2661e-09
ENSG00000107731	10	71212570	71302864	+	UNC5B	protein_coding	591.111	1.84094	0.293529	6.27174	3.57037e-10	4.29258e-09
ENSG00000279277	3	108032456	108039916	-	AC012020.1	lncRNA	28.1983	-5.59571	0.892221	-6.27166	3.57213e-10	4.29258e-09
ENSG00000272168	6	21664185	22654455	+	CASC15	lncRNA	109.787	-1.65699	0.264218	-6.27129	3.58065e-10	4.30002e-09
ENSG00000118263	2	207074137	207167267	-	KLF7	protein_coding	731.45	1.5405	0.245807	6.26711	3.67808e-10	4.41417e-09
ENSG00000199366	18	23582016	23582121	-	AC010853.1	misc_RNA	18.831	7.06647	1.12785	6.26542	3.71823e-10	4.45947e-09
ENSG00000164300	5	80111651	80256048	-	SERINC5	protein_coding	1157.19	1.40311	0.223974	6.26463	3.73723e-10	4.47937e-09
ENSG00000132792	20	37693955	37872129	+	CTNNBL1	protein_coding	551.28	-1.19637	0.190978	-6.26443	3.742e-10	4.48218e-09
ENSG00000205822	13	24408157	24597676	+	TPTE2P6	transcribed_unprocessed_pseudogene	17.3449	-7.12118	1.13682	-6.26413	3.74919e-10	4.4879e-09
ENSG00000136244	7	22725884	22732002	+	IL6	protein_coding	37.5297	-7.23804	1.15553	-6.26382	3.75651e-10	4.49376e-09
ENSG00000286830	7	102699228	102748695	-	AC105052.5	lncRNA	281.071	-2.22644	0.355705	-6.25922	3.86901e-10	4.62535e-09
ENSG00000275888	17	82244770	82245591	+	AC132872.3	lncRNA	59.5943	2.6009	0.415579	6.25849	3.88716e-10	4.64405e-09
ENSG00000204304	6	32184733	32190202	-	PBX2	protein_coding	667.605	0.785051	0.125486	6.2561	3.94726e-10	4.71282e-09
ENSG00000154743	3	12484432	12539623	+	TSEN2	protein_coding	247.051	-1.56838	0.250715	-6.25561	3.9596e-10	4.72452e-09
ENSG00000108846	17	50634777	50692253	+	ABCC3	protein_coding	475.487	2.03951	0.326051	6.2552	3.97019e-10	4.73409e-09
ENSG00000122482	1	90915298	91022272	-	ZNF644	protein_coding	1142.08	-1.48442	0.237324	-6.25483	3.97944e-10	4.74208e-09
ENSG00000285744	8	78805293	78956082	+	AC083837.1	lncRNA	62.0376	-3.28406	0.525251	-6.25236	4.04294e-10	4.81465e-09
ENSG00000255443	11	35210343	35214985	-	CD44-AS1	lncRNA	56.731	2.5789	0.412533	6.25138	4.06847e-10	4.84195e-09
ENSG00000156697	X	129906121	129929761	+	UTP14A	protein_coding	362.083	-1.59035	0.254411	-6.25109	4.07595e-10	4.84774e-09
ENSG00000017797	18	9475009	9538114	+	RALBP1	protein_coding	1587.72	1.10696	0.177134	6.24926	4.12391e-10	4.90164e-09
ENSG00000120008	10	120851305	120909524	+	WDR11	protein_coding	1769.95	-0.993892	0.159052	-6.24886	4.13458e-10	4.91117e-09
ENSG00000204815	17	41930617	41966503	+	TTC25	protein_coding	1703.52	-1.36637	0.218673	-6.24847	4.14488e-10	4.92025e-09
ENSG00000122547	7	36153254	36301538	+	EEPD1	protein_coding	78.0159	2.15305	0.344832	6.24376	4.27175e-10	5.06761e-09
ENSG00000138101	2	25377198	25673647	-	DTNB	protein_coding	205.305	1.64938	0.264252	6.24168	4.32897e-10	5.12892e-09
ENSG00000159461	16	56361452	56425545	-	AMFR	protein_coding	924.698	1.51621	0.242914	6.24173	4.32754e-10	5.12892e-09
ENSG00000121454	1	180230264	180278984	+	LHX4	protein_coding	30.4329	-4.71063	0.754785	-6.24102	4.34724e-10	5.14728e-09
ENSG00000119203	2	9423651	9473101	+	CPSF3	protein_coding	915.758	-1.41276	0.2264	-6.2401	4.37292e-10	5.17438e-09
ENSG00000164975	9	15422704	15465953	+	SNAPC3	protein_coding	920.283	0.764072	0.122523	6.23617	4.48401e-10	5.30245e-09
ENSG00000115875	2	38743599	38751494	-	SRSF7	protein_coding	2201.3	-1.49937	0.24046	-6.23542	4.50565e-10	5.32465e-09
ENSG00000250903	6	2245718	2525976	+	GMDS-DT	lncRNA	184.185	-1.50863	0.242058	-6.23253	4.58959e-10	5.4204e-09
ENSG00000252759	2	200863152	200863247	-	AC005037.2	misc_RNA	38.0336	4.51241	0.724373	6.2294	4.68229e-10	5.52636e-09
ENSG00000197157	7	127652194	128092609	+	SND1	protein_coding	1321.08	1.68422	0.270396	6.22874	4.70211e-10	5.54621e-09
ENSG00000108788	17	42567068	42573239	+	MLX	protein_coding	951.324	1.1369	0.182529	6.22863	4.70518e-10	5.54632e-09
ENSG00000099290	10	50067888	50133509	+	WASHC2A	protein_coding	1211.22	-0.681604	0.109442	-6.22797	4.72529e-10	5.56647e-09
ENSG00000253313	1	43281877	43285617	-	C1orf210	protein_coding	245.509	1.90042	0.305235	6.22609	4.78217e-10	5.6299e-09
ENSG00000088930	20	21303331	21389825	+	XRN2	protein_coding	2639.38	-1.01939	0.16374	-6.22564	4.79579e-10	5.64236e-09
ENSG00000164631	7	6688433	6706947	-	ZNF12	protein_coding	708.298	-1.49266	0.239791	-6.22483	4.82094e-10	5.66834e-09
ENSG00000110723	11	108505435	108593768	-	EXPH5	protein_coding	1567.51	-1.15867	0.186181	-6.22337	4.86598e-10	5.71768e-09
ENSG00000169738	17	82035136	82037709	-	DCXR	protein_coding	687.991	1.45425	0.233681	6.22321	4.87072e-10	5.71963e-09
ENSG00000197808	19	36636618	36666853	-	ZNF461	protein_coding	115.324	-1.97749	0.317795	-6.22255	4.89135e-10	5.74021e-09
ENSG00000167658	19	3976056	3985463	-	EEF2	protein_coding	14689.3	2.22947	0.358328	6.22187	4.91276e-10	5.7617e-09
ENSG00000204520	6	31399784	31415315	+	MICA	protein_coding	467.227	1.7272	0.277647	6.22085	4.94471e-10	5.7955e-09
ENSG00000178567	3	36985043	36993131	-	EPM2AIP1	protein_coding	646.769	-1.13411	0.182386	-6.21816	5.03029e-10	5.89208e-09
ENSG00000078699	20	33490075	33650036	+	CBFA2T2	protein_coding	497.494	1.19254	0.191837	6.21643	5.08584e-10	5.95339e-09
ENSG00000285796	20	45926518	45935055	-	AL162458.1	lncRNA	42.8904	-4.1839	0.673145	-6.21545	5.11769e-10	5.98689e-09
ENSG00000175536	11	74490519	74493724	-	LIPT2	protein_coding	25.7084	-5.33315	0.858179	-6.2145	5.14886e-10	6.01955e-09
ENSG00000279382	17	76090308	76091669	+	AC018665.1	TEC	55.0728	-2.66479	0.428893	-6.2132	5.19173e-10	6.06586e-09
ENSG00000151575	15	56244009	56445997	+	TEX9	protein_coding	919.112	-1.19512	0.192432	-6.21057	5.27924e-10	6.16421e-09
ENSG00000240429	3	179259028	179261273	-	LRRFIP1P1	processed_pseudogene	13.1923	-6.633	1.06823	-6.20933	5.32124e-10	6.20934e-09
ENSG00000143514	1	223779893	223845954	-	TP53BP2	protein_coding	886.339	1.18069	0.190161	6.20892	5.33485e-10	6.22131e-09
ENSG00000182372	8	1755778	1801711	+	CLN8	protein_coding	404.647	1.32968	0.214282	6.20531	5.45887e-10	6.36193e-09
ENSG00000138336	10	68560337	68694487	+	TET1	protein_coding	33.7539	-4.02128	0.648155	-6.2042	5.49761e-10	6.40306e-09
ENSG00000279608	9	35038625	35044326	-	AL353795.3	TEC	16.6755	-6.8786	1.10898	-6.20263	5.55286e-10	6.46335e-09
ENSG00000257298	12	50185580	50191363	-	AC008147.2	lncRNA	84.7419	4.01674	0.647791	6.20066	5.62252e-10	6.54032e-09
ENSG00000183808	8	93729356	93741017	-	RBM12B	protein_coding	258.962	-1.47812	0.2385	-6.19754	5.73539e-10	6.66744e-09
ENSG00000118762	4	88007635	88077777	+	PKD2	protein_coding	213.064	-1.50645	0.243105	-6.19669	5.76644e-10	6.69933e-09
ENSG00000265752	18	23957754	23982556	-	AC010754.1	lncRNA	12.1996	-6.6276	1.06996	-6.19427	5.85549e-10	6.79852e-09
ENSG00000116871	1	36155579	36180849	+	MAP7D1	protein_coding	1263.33	2.18845	0.353438	6.19188	5.94516e-10	6.89832e-09
ENSG00000108551	17	17494437	17496395	-	RASD1	protein_coding	39.163	4.40086	0.711013	6.18955	6.03344e-10	6.99637e-09
ENSG00000119509	9	100099243	100302175	+	INVS	protein_coding	250.118	-1.24035	0.200409	-6.18909	6.05131e-10	7.01272e-09
ENSG00000256043	4	155924118	155953866	-	CTSO	protein_coding	883.819	-0.961993	0.15546	-6.18803	6.09206e-10	7.05552e-09
ENSG00000119321	9	113161006	113221318	-	FKBP15	protein_coding	1422.86	-0.948964	0.153367	-6.18753	6.11144e-10	7.06729e-09
ENSG00000163545	1	205302063	205321760	-	NUAK2	protein_coding	290.376	2.0217	0.326741	6.18747	6.11365e-10	7.06729e-09
ENSG00000173599	11	66848417	66958386	-	PC	protein_coding	294.325	1.86007	0.300617	6.18751	6.11207e-10	7.06729e-09
ENSG00000132471	17	75845699	75856507	-	WBP2	protein_coding	1166.11	2.03696	0.329254	6.1866	6.14738e-10	7.10185e-09
ENSG00000160685	1	155002630	155018522	+	ZBTB7B	protein_coding	848.982	1.1896	0.192297	6.18626	6.16087e-10	7.113e-09
ENSG00000153201	2	108719482	108785809	+	RANBP2	protein_coding	4947.24	-1.28402	0.207566	-6.18609	6.16765e-10	7.1164e-09
ENSG00000136936	9	97674909	97697357	-	XPA	protein_coding	125.745	-1.34549	0.217567	-6.18425	6.23992e-10	7.19531e-09
ENSG00000182504	3	101724593	101770562	+	CEP97	protein_coding	921.038	-1.14317	0.184874	-6.18353	6.26829e-10	7.22353e-09
ENSG00000197937	19	53124072	53159075	-	ZNF347	protein_coding	140.424	-2.04918	0.331455	-6.18236	6.31489e-10	7.27271e-09
ENSG00000167996	11	61959718	61967634	-	FTH1	protein_coding	3109.87	2.18835	0.354019	6.18144	6.3518e-10	7.31068e-09
ENSG00000119703	14	75064109	75119502	+	ZC2HC1C	protein_coding	431.294	-1.65997	0.268555	-6.18109	6.36599e-10	7.32247e-09
ENSG00000105849	7	19695461	19709037	-	TWISTNB	protein_coding	583.812	-1.76603	0.285921	-6.17665	6.54745e-10	7.52653e-09
ENSG00000186591	7	129830732	129952960	-	UBE2H	protein_coding	2754.25	1.77807	0.287888	6.17627	6.56351e-10	7.54031e-09
ENSG00000116922	1	37681570	37692249	-	C1orf109	protein_coding	166.406	-2.06263	0.333977	-6.17597	6.57583e-10	7.54978e-09
ENSG00000149084	11	43680680	43856617	+	HSD17B12	protein_coding	769.723	1.15559	0.187116	6.17583	6.58164e-10	7.55178e-09
ENSG00000140332	15	70047790	70098176	-	TLE3	protein_coding	414.017	1.66215	0.269143	6.17569	6.58753e-10	7.55386e-09
ENSG00000147874	9	19053141	19102904	-	HAUS6	protein_coding	472.653	-1.54398	0.250131	-6.17267	6.71457e-10	7.69478e-09
ENSG00000075785	3	128726183	128814798	+	RAB7A	protein_coding	4316.77	0.983272	0.159369	6.16979	6.83817e-10	7.83159e-09
ENSG00000050748	5	180233143	180292099	-	MAPK9	protein_coding	606.321	0.953745	0.154586	6.16965	6.84394e-10	7.83336e-09
ENSG00000261136	15	39782571	39785617	+	AC023908.3	lncRNA	15.543	-6.61558	1.07276	-6.16685	6.96627e-10	7.96845e-09
ENSG00000281406	1	205434885	205457091	-	BLACAT1	protein_coding	144.427	1.92743	0.312662	6.16459	7.06654e-10	8.07816e-09
ENSG00000279278	22	22264601	22273020	+	AC245060.6	lncRNA	25.7265	-5.91581	0.959826	-6.16342	7.11912e-10	8.13326e-09
ENSG00000162694	1	100872372	100895179	-	EXTL2	protein_coding	302.156	-2.17203	0.352452	-6.16264	7.15402e-10	8.16809e-09
ENSG00000100321	22	39349925	39385575	+	SYNGR1	protein_coding	338.522	1.26843	0.205885	6.16085	7.23553e-10	8.25607e-09
ENSG00000111319	12	6346843	6377730	-	SCNN1A	protein_coding	4556.78	1.5199	0.246931	6.15515	7.50088e-10	8.55359e-09
ENSG00000082068	5	37379285	37753435	+	WDR70	protein_coding	570.082	-1.06675	0.173319	-6.15486	7.51426e-10	8.56357e-09
ENSG00000130385	X	50910735	50916641	+	BMP15	protein_coding	18.9449	-6.58703	1.07027	-6.15454	7.52968e-10	8.57062e-09
ENSG00000139044	12	459939	563509	+	B4GALNT3	protein_coding	290.308	1.90583	0.309657	6.15463	7.52508e-10	8.57062e-09
ENSG00000125122	16	67207139	67227048	-	LRRC29	protein_coding	28.0908	-3.98011	0.646871	-6.15286	7.60983e-10	8.65123e-09
ENSG00000134326	2	6840570	6866635	-	CMPK2	protein_coding	411.941	-4.12473	0.670367	-6.15293	7.60625e-10	8.65123e-09
ENSG00000143320	1	156699606	156705816	-	CRABP2	protein_coding	2055.78	2.38724	0.38805	6.15189	7.65658e-10	8.69904e-09
ENSG00000280378	1	54033126	54034880	-	AL353898.3	TEC	33.896	2.65907	0.432336	6.15047	7.72548e-10	8.77195e-09
ENSG00000184557	17	78356778	78360077	-	SOCS3	protein_coding	220.521	2.99182	0.48656	6.14894	7.80047e-10	8.85167e-09
ENSG00000162753	1	173500460	173603072	-	SLC9C2	protein_coding	73.7652	-3.09585	0.50352	-6.14841	7.82623e-10	8.87547e-09
ENSG00000100225	22	32474676	32498829	+	FBXO7	protein_coding	2137.74	0.782229	0.127263	6.14655	7.91859e-10	8.97473e-09
ENSG00000163121	2	96497646	96508109	-	NEURL3	protein_coding	167.815	2.90722	0.473124	6.14474	8.0096e-10	9.07232e-09
ENSG00000187778	12	49556544	49568145	-	MCRS1	protein_coding	440.804	-1.28137	0.208543	-6.14439	8.02726e-10	9.08678e-09
ENSG00000137161	6	42929192	42939294	+	CNPY3	protein_coding	353.231	1.24814	0.203164	6.14352	8.07113e-10	9.13087e-09
ENSG00000134533	12	15107783	15348675	-	RERG	protein_coding	50.3381	-5.1177	0.833046	-6.14336	8.0794e-10	9.13465e-09
ENSG00000186104	11	14877440	14892252	-	CYP2R1	protein_coding	233.334	-2.07633	0.338064	-6.14183	8.15781e-10	9.21768e-09
ENSG00000204592	6	30489509	30494194	+	HLA-E	protein_coding	4261.15	1.17482	0.191296	6.14136	8.18173e-10	9.23907e-09
ENSG00000240342	12	118246084	118246962	+	RPS2P5	processed_pseudogene	853.717	1.71391	0.279119	6.14041	8.23068e-10	9.28869e-09
ENSG00000149292	11	113314529	113383544	+	TTC12	protein_coding	1563.96	-1.33587	0.217562	-6.14017	8.24323e-10	9.29155e-09
ENSG00000187189	6	116249964	116254075	-	TSPYL4	protein_coding	510.791	-1.367	0.222631	-6.1402	8.24163e-10	9.29155e-09
ENSG00000001497	X	65512582	65534775	-	LAS1L	protein_coding	566.499	-1.0078	0.164146	-6.13963	8.27119e-10	9.31175e-09
ENSG00000147394	X	152914442	152973480	+	ZNF185	protein_coding	1459.11	1.83668	0.29915	6.13965	8.27035e-10	9.31175e-09
ENSG00000155545	5	56919602	56971675	-	MIER3	protein_coding	804.699	-1.33435	0.217578	-6.13272	8.63886e-10	9.71977e-09
ENSG00000095752	19	55364382	55370463	-	IL11	protein_coding	59.3111	3.15793	0.514991	6.13201	8.67761e-10	9.75744e-09
ENSG00000207563	9	95085208	95085304	+	MIR23B	miRNA	14.0659	-6.5059	1.06113	-6.13111	8.72669e-10	9.80668e-09
ENSG00000105669	19	18899514	18919387	-	COPE	protein_coding	1092.58	0.914351	0.149152	6.13031	8.77054e-10	9.84999e-09
ENSG00000157212	7	154943687	155003124	-	PAXIP1	protein_coding	153.947	-1.50633	0.245852	-6.12697	8.95674e-10	1.0053e-08
ENSG00000095209	9	105694541	105776629	+	TMEM38B	protein_coding	362.771	1.89735	0.309747	6.12549	9.04064e-10	1.01349e-08
ENSG00000101343	20	20034368	20056046	-	CRNKL1	protein_coding	882.262	-1.35069	0.220502	-6.12551	9.03936e-10	1.01349e-08
ENSG00000168496	11	61792911	61797238	+	FEN1	protein_coding	151.759	-2.05804	0.336023	-6.12471	9.08479e-10	1.01783e-08
ENSG00000221843	2	27537386	27582721	+	C2orf16	protein_coding	43.1653	-2.52715	0.412624	-6.12459	9.09165e-10	1.01798e-08
ENSG00000182993	12	14803666	14906586	+	C12orf60	protein_coding	48.5093	-3.18165	0.519971	-6.11889	9.42298e-10	1.05444e-08
ENSG00000253417	5	160931778	160938626	-	LINC02159	lncRNA	79.8974	-2.82373	0.461509	-6.11846	9.44829e-10	1.05664e-08
ENSG00000228107	21	36360630	36362040	+	AP000692.1	lncRNA	34.4521	3.88442	0.634912	6.11805	9.47256e-10	1.05871e-08
ENSG00000137522	11	71929018	71997597	+	RNF121	protein_coding	246.895	-1.36257	0.22276	-6.11675	9.55041e-10	1.06677e-08
ENSG00000128340	22	37225270	37244448	-	RAC2	protein_coding	451.45	2.43262	0.397745	6.11602	9.59393e-10	1.07099e-08
ENSG00000105983	7	156668946	156893216	-	LMBR1	protein_coding	509.407	1.1015	0.180148	6.11442	9.69075e-10	1.08114e-08
ENSG00000131653	16	2155698	2178129	+	TRAF7	protein_coding	747.241	1.64923	0.269806	6.11266	9.79869e-10	1.09253e-08
ENSG00000187944	2	196804415	196810276	-	C2orf66	protein_coding	58.9156	-4.29897	0.703376	-6.11191	9.84471e-10	1.097e-08
ENSG00000166246	16	4734344	4749396	+	C16orf71	protein_coding	162.002	-1.88495	0.308445	-6.11115	9.89174e-10	1.10158e-08
ENSG00000109929	11	121292681	121313410	+	SC5D	protein_coding	2630.29	1.25879	0.20609	6.10797	1.00909e-09	1.12309e-08
ENSG00000245498	11	124800424	124834487	+	AP000866.1	lncRNA	83.7637	-2.54049	0.415961	-6.10751	1.01196e-09	1.1256e-08
ENSG00000177200	16	53055033	53329150	+	CHD9	protein_coding	2040.33	-1.14822	0.188015	-6.10705	1.01492e-09	1.12822e-08
ENSG00000166436	11	8612037	8682694	-	TRIM66	protein_coding	321.444	-1.61199	0.263975	-6.1066	1.01779e-09	1.13072e-08
ENSG00000141579	17	82829434	82840022	-	ZNF750	protein_coding	611.23	1.86902	0.306155	6.10483	1.02912e-09	1.14263e-08
ENSG00000174599	4	117083554	117085576	-	TRAM1L1	protein_coding	24.1112	-5.48697	0.89881	-6.10471	1.0299e-09	1.14282e-08
ENSG00000151923	10	119571802	119597029	-	TIAL1	protein_coding	1298.65	0.805736	0.132062	6.10122	1.05265e-09	1.16736e-08
ENSG00000166401	18	63970029	64019779	+	SERPINB8	protein_coding	473.87	-1.84249	0.302004	-6.10088	1.05487e-09	1.16912e-08
ENSG00000131067	20	34844720	34872856	-	GGT7	protein_coding	288.439	1.4702	0.241026	6.09974	1.06243e-09	1.17609e-08
ENSG00000237529	9	83272280	83279499	+	AL137847.2	lncRNA	41.2718	-4.37664	0.717512	-6.09974	1.06242e-09	1.17609e-08
ENSG00000119537	18	63327726	63367228	-	KDSR	protein_coding	696.493	1.48155	0.24299	6.09713	1.07986e-09	1.19352e-08
ENSG00000131779	1	145911350	145918717	-	PEX11B	protein_coding	518.291	-1.27087	0.208437	-6.09716	1.07969e-09	1.19352e-08
ENSG00000161714	17	45108959	45133354	-	PLCD3	protein_coding	641.686	2.18388	0.358183	6.0971	1.0801e-09	1.19352e-08
ENSG00000146232	6	44258166	44265788	-	NFKBIE	protein_coding	345.732	1.545	0.253417	6.0967	1.08283e-09	1.19582e-08
ENSG00000143756	1	224114111	224162047	+	FBXO28	protein_coding	622.084	-1.26178	0.206991	-6.09581	1.08886e-09	1.20105e-08
ENSG00000152760	1	66752459	66779047	+	TCTEX1D1	protein_coding	1282.99	-1.25873	0.20649	-6.09584	1.08863e-09	1.20105e-08
ENSG00000146830	7	100679507	100694037	-	GIGYF1	protein_coding	537.881	-1.37291	0.225354	-6.09226	1.11329e-09	1.22727e-08
ENSG00000198042	8	33485182	33501262	+	MAK16	protein_coding	252.742	-2.07587	0.340801	-6.09115	1.121e-09	1.23503e-08
ENSG00000104964	19	3052910	3063107	-	TLE5	protein_coding	2744.51	1.08971	0.178981	6.08841	1.14041e-09	1.25567e-08
ENSG00000134824	11	61792980	61867354	+	FADS2	protein_coding	562.297	2.21252	0.363611	6.08484	1.16611e-09	1.2832e-08
ENSG00000130956	9	96450169	96491336	+	HABP4	protein_coding	77.2743	2.1434	0.352289	6.0842	1.17073e-09	1.28752e-08
ENSG00000139921	14	51240162	51257655	+	TMX1	protein_coding	1142.79	-1.2695	0.208695	-6.08307	1.179e-09	1.29586e-08
ENSG00000224843	6	26956932	27059749	+	LINC00240	lncRNA	109.05	-1.98436	0.326339	-6.08068	1.19675e-09	1.31459e-08
ENSG00000152767	13	98142562	98455176	+	FARP1	protein_coding	614.296	1.30286	0.214303	6.07953	1.20536e-09	1.32326e-08
ENSG00000005302	X	11758159	11775772	+	MSL3	protein_coding	821.249	-1.17057	0.192546	-6.07943	1.20609e-09	1.32327e-08
ENSG00000076258	1	171314183	171342084	+	FMO4	protein_coding	374.081	-1.49174	0.245465	-6.07722	1.22285e-09	1.34087e-08
ENSG00000164011	1	42846573	42852477	+	ZNF691	protein_coding	88.1199	-1.79132	0.294891	-6.07452	1.24359e-09	1.36281e-08
ENSG00000198948	4	169986597	170033031	-	MFAP3L	protein_coding	125.218	-2.36266	0.388954	-6.07439	1.24457e-09	1.36307e-08
ENSG00000147642	8	109573978	109691791	-	SYBU	protein_coding	743.392	-1.1448	0.188471	-6.07415	1.24647e-09	1.36355e-08
ENSG00000197976	X	1591604	1602520	+	AKAP17A	protein_coding	712.704	1.38076	0.227318	6.07415	1.24648e-09	1.36355e-08
ENSG00000005175	12	47661249	47706030	-	RPAP3	protein_coding	787.111	-1.10011	0.181124	-6.07378	1.24936e-09	1.36589e-08
ENSG00000126861	17	31272013	31297539	-	OMG	protein_coding	2704.82	-2.02223	0.33295	-6.07368	1.25008e-09	1.36589e-08
ENSG00000171155	X	120625674	120630054	-	C1GALT1C1	protein_coding	930.651	-1.33019	0.219037	-6.07292	1.25608e-09	1.37163e-08
ENSG00000134830	19	47332175	47347329	+	C5AR2	protein_coding	28.5226	5.32098	0.876953	6.06757	1.29859e-09	1.41714e-08
ENSG00000177600	11	809965	812880	+	RPLP2	protein_coding	5319.74	1.36477	0.224932	6.06749	1.29928e-09	1.41714e-08
ENSG00000065559	17	12020829	12143830	+	MAP2K4	protein_coding	953.998	-0.955558	0.157621	-6.06238	1.34121e-09	1.46201e-08
ENSG00000237491	1	778747	810065	+	LINC01409	lncRNA	35.0158	-4.70566	0.776228	-6.06221	1.34263e-09	1.46269e-08
ENSG00000283267	7	90316503	90321308	-	FAM237B	protein_coding	31.0805	-6.55763	1.08244	-6.0582	1.37654e-09	1.49876e-08
ENSG00000197056	1	35032172	35115859	+	ZMYM1	protein_coding	345.338	-1.52289	0.251392	-6.05783	1.37974e-09	1.50136e-08
ENSG00000113621	5	134873803	134901525	+	TXNDC15	protein_coding	508.303	-1.14755	0.189443	-6.0575	1.38251e-09	1.50349e-08
ENSG00000276289	21	7816675	7829926	-	KCNE1B	protein_coding	290.417	-3.09071	0.510278	-6.05692	1.38749e-09	1.50802e-08
ENSG00000002587	4	11393150	11429564	-	HS3ST1	protein_coding	531.145	1.89911	0.313597	6.05588	1.39649e-09	1.51692e-08
ENSG00000125945	1	23359448	23369836	-	ZNF436	protein_coding	799.535	-1.39294	0.230042	-6.05518	1.40257e-09	1.52263e-08
ENSG00000150773	11	112064010	112074274	-	PIH1D2	protein_coding	651.731	-1.24589	0.205834	-6.05289	1.42273e-09	1.54361e-08
ENSG00000170638	22	50185915	50199598	+	TRABD	protein_coding	430.107	1.25702	0.207715	6.05165	1.4337e-09	1.5546e-08
ENSG00000173715	11	66744451	66843328	+	C11orf80	protein_coding	285.276	1.28752	0.21279	6.05064	1.44273e-09	1.56347e-08
ENSG00000136783	9	104747683	104760120	+	NIPSNAP3A	protein_coding	640.564	-1.48357	0.245202	-6.05038	1.44507e-09	1.5651e-08
ENSG00000151012	4	138164097	138242349	-	SLC7A11	protein_coding	498.731	1.45687	0.240877	6.04818	1.46489e-09	1.58564e-08
ENSG00000242193	1	178006136	178037950	-	CRYZL2P	transcribed_unitary_pseudogene	137.645	-1.46011	0.241433	-6.04768	1.46944e-09	1.58963e-08
ENSG00000149212	11	95165513	95232541	-	SESN3	protein_coding	3013.98	-1.5878	0.262589	-6.04673	1.47819e-09	1.59817e-08
ENSG00000104529	8	143579697	143599541	-	EEF1D	protein_coding	311.619	-1.11898	0.185071	-6.04623	1.48279e-09	1.60221e-08
ENSG00000143842	1	204073115	204127743	+	SOX13	protein_coding	414.627	1.45698	0.241017	6.04513	1.49288e-09	1.61217e-08
ENSG00000167757	19	51022216	51028039	-	KLK11	protein_coding	731.26	1.69527	0.280452	6.04476	1.49632e-09	1.61495e-08
ENSG00000174446	15	66490135	66497780	-	SNAPC5	protein_coding	305.656	-1.34073	0.221898	-6.04211	1.52108e-09	1.64071e-08
ENSG00000163714	3	142964497	143060725	+	U2SURP	protein_coding	2353.95	-1.20787	0.199949	-6.04087	1.53283e-09	1.65229e-08
ENSG00000175984	1	114582848	114670422	-	DENND2C	protein_coding	1980.97	1.31093	0.217013	6.04079	1.53359e-09	1.65229e-08
ENSG00000221909	7	99546300	99558536	-	FAM200A	protein_coding	143.678	-2.41321	0.399499	-6.0406	1.53542e-09	1.6533e-08
ENSG00000128989	15	52547045	52569883	-	ARPP19	protein_coding	2543.07	0.834322	0.138151	6.03922	1.54864e-09	1.66609e-08
ENSG00000172403	4	118850688	119061247	+	SYNPO2	protein_coding	67.1248	-2.35619	0.390152	-6.03917	1.5491e-09	1.66609e-08
ENSG00000189369	X	51743442	51746232	+	GSPT2	protein_coding	130.235	-2.26674	0.375534	-6.03604	1.57941e-09	1.6977e-08
ENSG00000053770	14	57268924	57298742	+	AP5M1	protein_coding	1419.52	-1.51609	0.251186	-6.03571	1.58264e-09	1.70019e-08
ENSG00000267002	17	43148368	43171037	-	AC060780.1	lncRNA	446.295	-1.29361	0.214341	-6.0353	1.58672e-09	1.70359e-08
ENSG00000169379	3	93980139	94055678	+	ARL13B	protein_coding	394.691	-0.978671	0.162204	-6.03359	1.60355e-09	1.72067e-08
ENSG00000104413	8	94641074	94707466	+	ESRP1	protein_coding	2751.62	0.932469	0.154635	6.03012	1.63838e-09	1.75687e-08
ENSG00000170468	14	73490933	73493394	+	RIOX1	protein_coding	82.3564	-1.93251	0.320481	-6.03004	1.63919e-09	1.75687e-08
ENSG00000166479	18	68673688	68715108	-	TMX3	protein_coding	1069.11	-1.05378	0.174806	-6.02829	1.65707e-09	1.77501e-08
ENSG00000269439	19	17488990	17511889	-	AC010618.3	lncRNA	82.8799	2.45079	0.40658	6.0278	1.66202e-09	1.77928e-08
ENSG00000198331	11	125883614	125900648	+	HYLS1	protein_coding	201.103	-2.84706	0.472375	-6.02711	1.66913e-09	1.78587e-08
ENSG00000196396	20	50510321	50585241	+	PTPN1	protein_coding	700.708	1.35902	0.225515	6.02629	1.6777e-09	1.794e-08
ENSG00000162496	1	12567910	12618210	-	DHRS3	protein_coding	2975.9	1.42506	0.236493	6.02578	1.683e-09	1.79863e-08
ENSG00000015479	5	139293674	139331677	+	MATR3	protein_coding	202.335	1.88427	0.312759	6.02467	1.69451e-09	1.80989e-08
ENSG00000237460	1	106818224	106865316	+	LINC01661	lncRNA	15.38	-6.77244	1.12414	-6.02454	1.69588e-09	1.81031e-08
ENSG00000090238	16	30092314	30096915	-	YPEL3	protein_coding	580.774	1.53244	0.254382	6.02419	1.69961e-09	1.81325e-08
ENSG00000133115	13	38965925	38990859	-	STOML3	protein_coding	1711.51	-1.51915	0.252219	-6.02313	1.71075e-09	1.82408e-08
ENSG00000138658	4	112539333	112636995	-	ZGRF1	protein_coding	75.1408	-2.48032	0.411822	-6.0228	1.71426e-09	1.82677e-08
ENSG00000167969	16	2239402	2252300	-	ECI1	protein_coding	449.957	1.30607	0.216963	6.01976	1.74678e-09	1.86036e-08
ENSG00000189057	11	59107185	59127412	+	FAM111B	protein_coding	146.351	-7.44221	1.23705	-6.01611	1.78661e-09	1.90168e-08
ENSG00000165006	9	34179005	34252523	+	UBAP1	protein_coding	817.311	1.3593	0.225951	6.01589	1.78898e-09	1.90311e-08
ENSG00000270344	12	89524594	89548005	+	POC1B-AS1	lncRNA	138.064	-1.92929	0.320751	-6.01492	1.7998e-09	1.91353e-08
ENSG00000146223	6	42879616	42889925	+	RPL7L1	protein_coding	1749.46	-1.1139	0.185256	-6.01276	1.82396e-09	1.9381e-08
ENSG00000138794	4	109688622	109703583	-	CASP6	protein_coding	164.519	-1.96043	0.326128	-6.01125	1.84103e-09	1.95512e-08
ENSG00000115306	2	54456317	54671446	+	SPTBN1	protein_coding	5579.07	1.40798	0.234344	6.00817	1.87634e-09	1.99148e-08
ENSG00000143858	1	202590596	202710454	-	SYT2	protein_coding	29.1088	-5.44144	0.906031	-6.0058	1.90388e-09	2.01955e-08
ENSG00000129071	3	129430944	129440179	-	MBD4	protein_coding	956.363	-1.05259	0.17527	-6.00557	1.90662e-09	2.0213e-08
ENSG00000184949	22	38578120	38656629	-	FAM227A	protein_coding	1014.01	-1.3171	0.219324	-6.00529	1.90992e-09	2.02364e-08
ENSG00000065357	12	55927319	55954027	+	DGKA	protein_coding	1751.34	1.25538	0.209138	6.00262	1.94154e-09	2.05597e-08
ENSG00000030110	6	33572547	33580293	-	BAK1	protein_coding	717.931	2.1966	0.365965	6.00222	1.94639e-09	2.05988e-08
ENSG00000135365	11	45929323	46121178	-	PHF21A	protein_coding	626.253	0.883414	0.147186	6.00204	1.94857e-09	2.05988e-08
ENSG00000139517	13	27545913	27620529	-	LNX2	protein_coding	589.788	1.20743	0.201169	6.00206	1.94825e-09	2.05988e-08
ENSG00000189377	19	42428278	42442946	-	CXCL17	protein_coding	14967.9	1.20596	0.200966	6.00084	1.96304e-09	2.074e-08
ENSG00000138698	4	98261384	98443861	+	RAP1GDS1	protein_coding	904.197	1.12453	0.187467	5.99856	1.9908e-09	2.10213e-08
ENSG00000011304	19	797075	812327	+	PTBP1	protein_coding	2211.16	1.44221	0.240442	5.99815	1.99575e-09	2.10616e-08
ENSG00000165512	10	45000923	45005326	+	ZNF22	protein_coding	98.343	-1.70802	0.284787	-5.99751	2.00365e-09	2.11329e-08
ENSG00000172748	8	232137	264703	+	ZNF596	protein_coding	99.7308	-2.74969	0.458508	-5.99703	2.00955e-09	2.11831e-08
ENSG00000183309	8	143636013	143656418	+	ZNF623	protein_coding	253.743	-1.72546	0.287868	-5.99393	2.04835e-09	2.15798e-08
ENSG00000166004	11	93661682	93730358	+	CEP295	protein_coding	452.586	-2.06327	0.344261	-5.99332	2.05595e-09	2.16476e-08
ENSG00000148120	9	94726701	95087218	+	AOPEP	protein_coding	972.263	-1.10088	0.183709	-5.99251	2.06625e-09	2.17438e-08
ENSG00000133665	10	80344745	80368073	+	DYDC2	protein_coding	1395.02	-1.18732	0.198137	-5.99241	2.06748e-09	2.17443e-08
ENSG00000226328	22	45133020	45163781	-	NUP50-DT	lncRNA	822.412	1.10988	0.185244	5.99148	2.0794e-09	2.18573e-08
ENSG00000258846	12	96900697	96902698	-	EEF1A1P33	processed_pseudogene	16.224	-6.51935	1.08826	-5.99064	2.09023e-09	2.19587e-08
ENSG00000163597	17	76557764	76565348	+	SNHG16	lncRNA	731.456	0.970154	0.16199	5.98899	2.11148e-09	2.21693e-08
ENSG00000005238	9	35104112	35116341	-	FAM214B	protein_coding	520.4	1.94384	0.324576	5.98884	2.11345e-09	2.21775e-08
ENSG00000103489	16	17101769	17470960	-	XYLT1	protein_coding	43.9557	2.96245	0.494733	5.98798	2.1246e-09	2.22819e-08
ENSG00000116698	1	183472216	183598246	+	SMG7	protein_coding	1419.01	0.956044	0.159664	5.98783	2.12657e-09	2.22899e-08
ENSG00000129353	19	10602457	10644557	+	SLC44A2	protein_coding	1555.41	1.13217	0.189091	5.98742	2.132e-09	2.23342e-08
ENSG00000170100	16	89217703	89237071	+	ZNF778	protein_coding	89.5059	-2.5337	0.423232	-5.98654	2.14345e-09	2.24415e-08
ENSG00000170855	12	120443964	120446384	-	TRIAP1	protein_coding	464.93	-1.18924	0.198679	-5.98574	2.15406e-09	2.25398e-08
ENSG00000069345	16	46955362	46973674	-	DNAJA2	protein_coding	1454.49	1.17457	0.196256	5.98489	2.16534e-09	2.2645e-08
ENSG00000149346	20	10435305	10636829	+	SLX4IP	protein_coding	181.198	-1.62716	0.271971	-5.98284	2.19279e-09	2.29192e-08
ENSG00000164897	7	151081085	151083493	-	TMUB1	protein_coding	299.472	1.43083	0.23923	5.98098	2.21804e-09	2.31701e-08
ENSG00000117523	1	171485551	171593511	+	PRRC2C	protein_coding	3637.1	0.915246	0.153081	5.97883	2.24743e-09	2.34638e-08
ENSG00000058804	1	53765478	53838463	-	NDC1	protein_coding	764.901	-1.28475	0.214939	-5.97725	2.26932e-09	2.36791e-08
ENSG00000151093	3	25782917	25794534	+	OXSM	protein_coding	258.918	-1.47681	0.247077	-5.97711	2.27136e-09	2.36871e-08
ENSG00000162909	1	223701593	223776018	+	CAPN2	protein_coding	9579.44	1.1469	0.191932	5.97556	2.29304e-09	2.38863e-08
ENSG00000221986	1	109292365	109307011	-	MYBPHL	protein_coding	14.9578	-6.94204	1.16172	-5.97564	2.29184e-09	2.38863e-08
ENSG00000248213	4	118635970	118638782	-	CICP16	processed_pseudogene	12.9302	-6.80092	1.13835	-5.97435	2.31003e-09	2.40498e-08
ENSG00000171703	20	64049836	64072347	+	TCEA2	protein_coding	184.672	1.29174	0.216283	5.97244	2.33724e-09	2.43194e-08
ENSG00000220343	3	167065831	167066320	+	PPIAP74	processed_pseudogene	14.4455	-6.60471	1.10606	-5.97138	2.35257e-09	2.44651e-08
ENSG00000169919	7	65960684	65982215	-	GUSB	protein_coding	339.839	1.71367	0.287002	5.97093	2.35912e-09	2.45195e-08
ENSG00000272631	10	86749754	86756298	-	AC067750.1	lncRNA	12.344	-6.39923	1.07205	-5.96914	2.38506e-09	2.47752e-08
ENSG00000232551	1	106804474	106806032	-	MTCO1P14	processed_pseudogene	11.9938	-6.66635	1.11691	-5.96854	2.39383e-09	2.48525e-08
ENSG00000197362	7	149069641	149090782	-	ZNF786	protein_coding	40.3326	-3.82176	0.640532	-5.96654	2.42344e-09	2.51457e-08
ENSG00000143761	1	228082660	228099212	+	ARF1	protein_coding	4538.49	1.16825	0.195807	5.96635	2.42626e-09	2.51609e-08
ENSG00000187240	11	103109410	103479863	+	DYNC2H1	protein_coding	3729.7	-1.2061	0.202244	-5.9636	2.46741e-09	2.55734e-08
ENSG00000070061	9	108867517	108934124	-	ELP1	protein_coding	1366.43	-0.812579	0.136264	-5.96327	2.47245e-09	2.56113e-08
ENSG00000146094	5	177501907	177511274	-	DOK3	protein_coding	31.7852	-4.67858	0.78465	-5.96263	2.48213e-09	2.56972e-08
ENSG00000176890	18	657653	673578	+	TYMS	protein_coding	33.0797	-4.3209	0.724942	-5.96034	2.51715e-09	2.60307e-08
ENSG00000214530	11	72754729	72793681	-	STARD10	protein_coding	897.933	0.955289	0.160274	5.96035	2.51695e-09	2.60307e-08
ENSG00000142046	19	41350911	41384083	+	TMEM91	protein_coding	85.8623	1.83542	0.308134	5.95658	2.57573e-09	2.66216e-08
ENSG00000156030	14	73715122	73790285	-	ELMSAN1	protein_coding	510.207	1.17465	0.197309	5.95333	2.62746e-09	2.7126e-08
ENSG00000254884	11	9311284	9311689	-	PRR13P2	processed_pseudogene	22.2234	3.92924	0.660004	5.95336	2.62694e-09	2.7126e-08
ENSG00000147679	8	116766505	116849463	+	UTP23	protein_coding	159.01	-1.73086	0.290774	-5.9526	2.63915e-09	2.72316e-08
ENSG00000119616	14	74713144	74738620	+	FCF1	protein_coding	1042.16	-0.751474	0.126277	-5.95098	2.66538e-09	2.74869e-08
ENSG00000117676	1	26529761	26575030	+	RPS6KA1	protein_coding	627.587	1.43104	0.240475	5.95086	2.66734e-09	2.74918e-08
ENSG00000264112	17	57989039	57994850	-	AC015813.1	lncRNA	301.717	-1.74145	0.292764	-5.94831	2.70931e-09	2.79089e-08
ENSG00000196352	1	207321376	207386804	+	CD55	protein_coding	1498.08	1.60141	0.269299	5.94659	2.73794e-09	2.81882e-08
ENSG00000114473	3	197889077	197960142	-	IQCG	protein_coding	4200.93	-1.18933	0.200018	-5.94611	2.74597e-09	2.82394e-08
ENSG00000125534	20	63520765	63522206	+	PPDPF	protein_coding	2122.53	2.26014	0.3801	5.94618	2.74478e-09	2.82394e-08
ENSG00000131504	5	141515016	141619055	-	DIAPH1	protein_coding	1359.53	1.35905	0.228604	5.945	2.76457e-09	2.8415e-08
ENSG00000118690	6	108848416	108974476	+	ARMC2	protein_coding	750.698	-1.28426	0.216099	-5.94292	2.79981e-09	2.87475e-08
ENSG00000214783	7	43940895	44019175	-	POLR2J4	lncRNA	25.3604	-4.15449	0.699067	-5.94291	2.80002e-09	2.87475e-08
ENSG00000233030	1	149785659	149793020	-	AC243772.2	lncRNA	24.0038	-4.97902	0.837835	-5.94271	2.8034e-09	2.87662e-08
ENSG00000235109	6	28324693	28356271	-	ZSCAN31	protein_coding	1036.82	-3.27596	0.551316	-5.94207	2.8144e-09	2.88632e-08
ENSG00000247081	8	103153394	103298772	-	BAALC-AS1	lncRNA	291.636	-1.65176	0.277987	-5.94184	2.81832e-09	2.88874e-08
ENSG00000231064	1	155195004	155205495	+	AC234582.1	lncRNA	46.0229	-3.03424	0.510732	-5.94097	2.83336e-09	2.90255e-08
ENSG00000283156	4	56410516	56431548	+	AC068620.3	transcribed_unprocessed_pseudogene	26.6563	-5.39766	0.908918	-5.93856	2.87541e-09	2.944e-08
ENSG00000262503	17	6927472	6928191	-	AC027763.1	processed_pseudogene	15.5049	-6.44894	1.08596	-5.93846	2.87704e-09	2.94404e-08
ENSG00000137216	6	44126914	44155519	+	TMEM63B	protein_coding	957.422	1.56913	0.264236	5.93835	2.87913e-09	2.94456e-08
ENSG00000103121	16	80966448	81020270	-	CMC2	protein_coding	204.885	1.16348	0.196004	5.936	2.92054e-09	2.98362e-08
ENSG00000277161	17	36534987	36539310	+	PIGW	protein_coding	42.4245	-3.56612	0.600753	-5.93609	2.91898e-09	2.98362e-08
ENSG00000127914	7	91940867	92110673	+	AKAP9	protein_coding	5533.9	-1.08152	0.182222	-5.93519	2.93498e-09	2.99672e-08
ENSG00000139973	14	61811974	62112550	+	SYT16	protein_coding	63.2455	-2.76866	0.466582	-5.93391	2.95801e-09	3.01857e-08
ENSG00000158850	1	161171310	161177968	-	B4GALT3	protein_coding	403.885	1.32331	0.223049	5.93282	2.97777e-09	3.03707e-08
ENSG00000241322	17	15565483	15619512	-	CDRT1	protein_coding	45.919	-2.87826	0.4852	-5.93212	2.99057e-09	3.04844e-08
ENSG00000109323	4	102630770	102760994	-	MANBA	protein_coding	1020.13	1.12122	0.189034	5.93134	3.00475e-09	3.06121e-08
ENSG00000198561	11	57753243	57819546	+	CTNND1	protein_coding	622.566	1.04314	0.175895	5.93047	3.0207e-09	3.07578e-08
ENSG00000171815	5	141051135	141059344	+	PCDHB1	protein_coding	24.8639	-4.81145	0.811326	-5.93035	3.0229e-09	3.07632e-08
ENSG00000074964	1	17539698	17697874	+	ARHGEF10L	protein_coding	949.084	1.79944	0.303522	5.92855	3.05621e-09	3.10851e-08
ENSG00000187608	1	1001138	1014540	+	ISG15	protein_coding	1703.97	-3.52325	0.594306	-5.92833	3.06023e-09	3.1109e-08
ENSG00000006652	7	112422968	112481017	+	IFRD1	protein_coding	1683.6	1.04439	0.176181	5.92791	3.0682e-09	3.11729e-08
ENSG00000243650	2	230507101	230507386	+	RN7SL834P	misc_RNA	12.5661	-6.87782	1.16053	-5.92645	3.09545e-09	3.14325e-08
ENSG00000151694	2	9488486	9556732	-	ADAM17	protein_coding	1002.49	0.896396	0.151279	5.92547	3.11414e-09	3.16051e-08
ENSG00000126705	1	27534035	27604431	-	AHDC1	protein_coding	701.748	1.53684	0.259368	5.92534	3.11659e-09	3.16125e-08
ENSG00000168528	1	31409565	31434680	+	SERINC2	protein_coding	3097.05	2.16659	0.365704	5.92444	3.13356e-09	3.17673e-08
ENSG00000224347	13	77599755	77606551	-	SCEL-AS1	lncRNA	19.8867	4.49682	0.759158	5.92343	3.15286e-09	3.19456e-08
ENSG00000185621	3	197960200	198043720	+	LMLN	protein_coding	587.64	-0.982968	0.165959	-5.92294	3.16227e-09	3.20234e-08
ENSG00000173214	6	111259327	111445354	+	MFSD4B	protein_coding	400.793	-1.18364	0.199897	-5.92123	3.19536e-09	3.23408e-08
ENSG00000153786	16	84974181	85011535	-	ZDHHC7	protein_coding	1214.88	1.65604	0.279685	5.92108	3.19824e-09	3.23524e-08
ENSG00000182580	3	184561785	184582408	+	EPHB3	protein_coding	205.998	2.11045	0.356435	5.921	3.2e-09	3.23524e-08
ENSG00000138942	22	31160182	31207019	+	RNF185	protein_coding	637.499	-0.862726	0.145718	-5.92052	3.20929e-09	3.24287e-08
ENSG00000122034	13	27424619	27435823	+	GTF3A	protein_coding	717.809	1.06207	0.179411	5.91974	3.22449e-09	3.25646e-08
ENSG00000141971	19	17405722	17433724	+	MVB12A	protein_coding	354.935	1.33148	0.225011	5.91741	3.27055e-09	3.30117e-08
ENSG00000136854	9	127579370	127696027	+	STXBP1	protein_coding	238.978	1.76093	0.2976	5.9171	3.27676e-09	3.30564e-08
ENSG00000110218	11	94128841	94181968	+	PANX1	protein_coding	286.239	-1.18605	0.200472	-5.91631	3.2925e-09	3.31971e-08
ENSG00000204611	19	52113091	52139938	-	ZNF616	protein_coding	257.145	-1.47072	0.248649	-5.91487	3.32147e-09	3.3471e-08
ENSG00000163617	3	113964137	114056594	-	CCDC191	protein_coding	924.843	-1.1483	0.194193	-5.91321	3.35508e-09	3.37914e-08
ENSG00000158050	2	96143169	96145440	-	DUSP2	protein_coding	81.1767	3.61816	0.612163	5.91046	3.41153e-09	3.43413e-08
ENSG00000249464	4	123539026	123962698	+	LINC01091	lncRNA	160.422	-2.18755	0.370135	-5.91016	3.41783e-09	3.4386e-08
ENSG00000148337	9	128161251	128204383	-	CIZ1	protein_coding	475.199	1.22769	0.207732	5.90996	3.42191e-09	3.44084e-08
ENSG00000156253	21	29004384	29019360	-	RWDD2B	protein_coding	357.437	-1.27464	0.215686	-5.90971	3.427e-09	3.44409e-08
ENSG00000084234	11	130068147	130144811	+	APLP2	protein_coding	10927	1.47766	0.250071	5.90896	3.44266e-09	3.45608e-08
ENSG00000196821	6	34587288	34696859	-	ILRUN	protein_coding	1474.47	1.36153	0.230417	5.90897	3.4425e-09	3.45608e-08
ENSG00000169989	4	152769354	152779730	-	TIGD4	protein_coding	103.646	-2.08224	0.352409	-5.9086	3.45024e-09	3.46182e-08
ENSG00000125731	19	6752160	6767463	-	SH2D3A	protein_coding	582.364	1.32164	0.223712	5.90777	3.46779e-09	3.47754e-08
ENSG00000249631	4	11625714	11823906	+	AC005699.1	lncRNA	103.58	-2.82589	0.478421	-5.90671	3.49009e-09	3.49801e-08
ENSG00000100412	22	41469117	41528989	+	ACO2	protein_coding	860.87	1.40263	0.237605	5.9032	3.56521e-09	3.57138e-08
ENSG00000256433	12	6393879	6396148	+	AC005840.2	lncRNA	12.4473	-6.65869	1.12864	-5.89976	3.64025e-09	3.64457e-08
ENSG00000108175	10	79068966	79316528	+	ZMIZ1	protein_coding	644.056	1.53395	0.260012	5.89954	3.64512e-09	3.64748e-08
ENSG00000164930	8	103298433	103332866	+	FZD6	protein_coding	4858	-1.27842	0.216778	-5.89737	3.69333e-09	3.69373e-08
ENSG00000179583	16	10866222	10943021	+	CIITA	protein_coding	213.09	-1.65672	0.280989	-5.89605	3.72298e-09	3.72138e-08
ENSG00000198513	14	50532509	50633068	+	ATL1	protein_coding	192.799	-1.50664	0.255571	-5.89521	3.74202e-09	3.73839e-08
ENSG00000175550	11	65919274	65921563	+	DRAP1	protein_coding	595.242	2.08426	0.353571	5.89489	3.74923e-09	3.74358e-08
ENSG00000140391	15	77041404	77083984	-	TSPAN3	protein_coding	9037.06	0.897074	0.1522	5.89406	3.76818e-09	3.76048e-08
ENSG00000269899	8	11846154	11846391	-	AC025857.2	lncRNA	92.7997	2.30054	0.390382	5.89306	3.79113e-09	3.78134e-08
ENSG00000175793	1	26863149	26864456	+	SFN	protein_coding	4978.66	2.34994	0.39885	5.89179	3.82026e-09	3.8063e-08
ENSG00000186007	1	205381378	205455954	-	LEMD1	protein_coding	110.303	2.72882	0.463155	5.89181	3.81991e-09	3.8063e-08
ENSG00000138798	4	109912883	110013766	+	EGF	protein_coding	426.706	1.50037	0.254675	5.89132	3.83125e-09	3.8152e-08
ENSG00000073060	12	124776856	124882668	-	SCARB1	protein_coding	180.314	2.21853	0.376744	5.88869	3.89272e-09	3.87434e-08
ENSG00000167671	19	4444999	4457794	-	UBXN6	protein_coding	1105.81	1.22355	0.207814	5.8877	3.91597e-09	3.89538e-08
ENSG00000114126	3	141944428	142149544	-	TFDP2	protein_coding	947.521	-0.879066	0.149324	-5.88697	3.93332e-09	3.91054e-08
ENSG00000113593	5	65563236	65587549	+	PPWD1	protein_coding	697.887	-1.24123	0.21085	-5.88681	3.93713e-09	3.91223e-08
ENSG00000131508	5	139526431	139628434	+	UBE2D2	protein_coding	734.185	1.08171	0.183764	5.8864	3.94697e-09	3.91991e-08
ENSG00000170889	19	54200809	54249003	+	RPS9	protein_coding	7379.14	1.25856	0.213842	5.88545	3.96961e-09	3.94028e-08
ENSG00000149050	11	6997085	7020346	-	ZNF214	protein_coding	291.714	-1.80538	0.30682	-5.88417	4.00049e-09	3.96881e-08
ENSG00000151881	5	43444252	43483893	-	TMEM267	protein_coding	279.802	-1.26112	0.214417	-5.88159	4.06339e-09	4.02906e-08
ENSG00000161057	7	103344254	103369395	+	PSMC2	protein_coding	1977.55	-1.1176	0.190077	-5.87973	4.10944e-09	4.07254e-08
ENSG00000144821	3	108380368	108529322	-	MYH15	protein_coding	86.6754	-3.75652	0.638976	-5.87897	4.12822e-09	4.08897e-08
ENSG00000228918	1	182096338	182314061	-	LINC01344	lncRNA	90.9497	-2.06781	0.351874	-5.87658	4.18835e-09	4.14631e-08
ENSG00000118096	11	118544528	118572970	-	IFT46	protein_coding	1636.47	-0.988419	0.168231	-5.87537	4.21907e-09	4.17449e-08
ENSG00000233237	6	71343427	71420745	-	LINC00472	lncRNA	275.365	-2.31824	0.394608	-5.87478	4.23396e-09	4.187e-08
ENSG00000067082	10	3775996	3785281	-	KLF6	protein_coding	1728.9	1.9048	0.324335	5.87293	4.28152e-09	4.23177e-08
ENSG00000134215	1	107571161	107965180	-	VAV3	protein_coding	1213.58	-2.41878	0.41186	-5.87281	4.28469e-09	4.23264e-08
ENSG00000121900	1	32894594	32901438	-	TMEM54	protein_coding	290.724	2.01681	0.343466	5.87193	4.30741e-09	4.25282e-08
ENSG00000206531	3	112815709	112846856	-	CD200R1L	protein_coding	137.614	-5.06929	0.863458	-5.87091	4.33404e-09	4.27684e-08
ENSG00000147224	X	107628424	107651026	+	PRPS1	protein_coding	755.917	-1.14759	0.195544	-5.86872	4.39181e-09	4.33154e-08
ENSG00000132780	1	45583846	45618904	+	NASP	protein_coding	1270.03	-1.07583	0.183322	-5.86852	4.39698e-09	4.33203e-08
ENSG00000172167	8	120445400	120542133	+	MTBP	protein_coding	83.4323	-2.86316	0.487883	-5.86854	4.39661e-09	4.33203e-08
ENSG00000205937	16	2253116	2268397	-	RNPS1	protein_coding	694.869	1.14779	0.195593	5.86825	4.40418e-09	4.33682e-08
ENSG00000144909	3	125528858	125595497	-	OSBPL11	protein_coding	423.274	1.35209	0.230437	5.86749	4.42434e-09	4.35436e-08
ENSG00000159208	1	150282543	150287093	+	CIART	protein_coding	220.88	1.48145	0.252648	5.86369	4.52699e-09	4.45302e-08
ENSG00000135372	11	34105617	34147670	+	NAT10	protein_coding	455.703	-0.992603	0.169325	-5.86213	4.56962e-09	4.49258e-08
ENSG00000198380	2	69319769	69387254	-	GFPT1	protein_coding	3619.66	0.994365	0.169702	5.85947	4.64351e-09	4.5628e-08
ENSG00000148950	11	31432401	31509645	-	IMMP1L	protein_coding	72.0658	-2.2671	0.387031	-5.85765	4.69455e-09	4.61051e-08
ENSG00000142528	19	50025714	50053414	+	ZNF473	protein_coding	565.949	-1.16979	0.199711	-5.85741	4.70146e-09	4.61485e-08
ENSG00000136051	12	105107324	105169134	+	WASHC4	protein_coding	1446.81	-1.06163	0.181276	-5.85641	4.72969e-09	4.6401e-08
ENSG00000150093	10	32900318	33005792	-	ITGB1	protein_coding	18076.1	1.06755	0.182347	5.8545	4.78439e-09	4.69128e-08
ENSG00000267325	18	55776727	55781722	-	LINC01415	lncRNA	24.8361	-4.36182	0.745284	-5.85256	4.84052e-09	4.74381e-08
ENSG00000169750	17	82031678	82034204	+	RAC3	protein_coding	73.8312	1.55185	0.265181	5.85205	4.85551e-09	4.75599e-08
ENSG00000065978	1	42682418	42703805	+	YBX1	protein_coding	5037.44	1.43276	0.244902	5.85033	4.90593e-09	4.80284e-08
ENSG00000070526	17	76624761	76643786	-	ST6GALNAC1	protein_coding	3069.7	-1.00509	0.171819	-5.84973	4.92377e-09	4.81776e-08
ENSG00000204256	6	32968594	32981505	+	BRD2	protein_coding	1866.52	0.886595	0.151567	5.84954	4.92937e-09	4.8207e-08
ENSG00000267508	19	44382298	44401608	-	ZNF285	protein_coding	65.7053	-3.06292	0.523695	-5.84867	4.95517e-09	4.84338e-08
ENSG00000132664	20	18467389	18484646	+	POLR3F	protein_coding	295.256	-1.61737	0.276701	-5.84519	5.05976e-09	4.943e-08
ENSG00000182463	20	52972358	53495330	+	TSHZ2	protein_coding	616.61	1.16386	0.199183	5.84314	5.12256e-09	5.00171e-08
ENSG00000197748	10	104129888	104232364	-	CFAP43	protein_coding	3941.76	-1.14143	0.195371	-5.84239	5.14577e-09	5.02173e-08
ENSG00000175611	9	95759231	95876049	-	LINC00476	lncRNA	89.0221	-2.32587	0.398186	-5.84116	5.18384e-09	5.05622e-08
ENSG00000196937	7	121348878	121396364	-	FAM3C	protein_coding	4179.86	1.29371	0.221498	5.84074	5.1971e-09	5.06649e-08
ENSG00000158286	1	6205475	6221299	+	RNF207	protein_coding	284.312	-2.14946	0.368038	-5.84033	5.20984e-09	5.07624e-08
ENSG00000230739	1	162824795	162849467	+	AL392003.2	unprocessed_pseudogene	27.0996	-5.02149	0.860016	-5.83884	5.25669e-09	5.11919e-08
ENSG00000162971	2	199928913	199955736	-	TYW5	protein_coding	283.264	-1.42184	0.243522	-5.83864	5.26292e-09	5.12257e-08
ENSG00000175768	9	37582646	37592604	-	TOMM5	protein_coding	10.7933	-6.43136	1.10162	-5.83809	5.28024e-09	5.13674e-08
ENSG00000101444	20	34280268	34311802	-	AHCY	protein_coding	1318.89	1.28007	0.219296	5.83715	5.31028e-09	5.16325e-08
ENSG00000182087	19	1009648	1021179	-	TMEM259	protein_coding	869.285	1.32275	0.226685	5.83521	5.3723e-09	5.22082e-08
ENSG00000150990	12	124946825	124989131	-	DHX37	protein_coding	108.744	-1.61976	0.277633	-5.83418	5.40547e-09	5.2503e-08
ENSG00000181904	5	134845680	134859735	+	C5orf24	protein_coding	680.802	-1.12349	0.192584	-5.83375	5.41949e-09	5.26117e-08
ENSG00000137955	1	75786197	75795086	+	RABGGTB	protein_coding	1432.29	1.13654	0.194906	5.83121	5.50253e-09	5.33898e-08
ENSG00000088280	1	23428563	23484568	-	ASAP3	protein_coding	378.215	1.13272	0.194263	5.83087	5.5138e-09	5.34712e-08
ENSG00000145723	5	103086000	103120138	-	GIN1	protein_coding	168.822	-1.35037	0.2316	-5.83061	5.52264e-09	5.35289e-08
ENSG00000156671	10	75099586	75182123	+	SAMD8	protein_coding	1417.6	1.23974	0.212698	5.82864	5.588e-09	5.41341e-08
ENSG00000119720	14	90267860	90331969	-	NRDE2	protein_coding	361.263	-1.3071	0.224259	-5.8285	5.59282e-09	5.41525e-08
ENSG00000005379	17	58301228	58328795	-	TSPOAP1	protein_coding	319.698	-1.27898	0.219526	-5.8261	5.67382e-09	5.49082e-08
ENSG00000176444	1	155262868	155278491	-	CLK2	protein_coding	352.124	-1.48362	0.254695	-5.82508	5.70843e-09	5.52142e-08
ENSG00000087266	4	2793071	2841098	+	SH3BP2	protein_coding	1019.98	1.35651	0.2329	5.82445	5.73022e-09	5.53961e-08
ENSG00000182973	3	32685145	32773875	+	CNOT10	protein_coding	761.089	-1.14704	0.196975	-5.82329	5.76992e-09	5.57508e-08
ENSG00000268912	19	58428632	58431148	-	AC012313.5	lncRNA	106.134	-2.02914	0.348482	-5.82278	5.78751e-09	5.58917e-08
ENSG00000153822	17	70053429	70135608	+	KCNJ16	protein_coding	152.861	-3.41058	0.586146	-5.81866	5.93205e-09	5.72577e-08
ENSG00000074695	18	59327823	59359265	-	LMAN1	protein_coding	5178.3	0.846792	0.145586	5.81643	6.01185e-09	5.79977e-08
ENSG00000168447	16	23278231	23381294	+	SCNN1B	protein_coding	171.965	2.0018	0.344246	5.81502	6.06259e-09	5.84569e-08
ENSG00000115414	2	215360440	215436073	-	FN1	protein_coding	1362.94	-6.01892	1.0354	-5.8131	6.13247e-09	5.90999e-08
ENSG00000103319	16	22206278	22288738	+	EEF2K	protein_coding	215.731	-1.32421	0.227884	-5.8109	6.21376e-09	5.98263e-08
ENSG00000215190	6	57946074	57961501	-	LINC00680	transcribed_unprocessed_pseudogene	27.4573	-5.4903	0.944831	-5.81089	6.2143e-09	5.98263e-08
ENSG00000133477	22	39994954	40043534	+	FAM83F	protein_coding	706.018	1.29907	0.223571	5.81055	6.22667e-09	5.99143e-08
ENSG00000171453	6	43509702	43562419	+	POLR1C	protein_coding	337.08	-1.47834	0.254445	-5.81006	6.24502e-09	6.00597e-08
ENSG00000173409	1	230978981	231000733	+	ARV1	protein_coding	402.755	-1.32066	0.227384	-5.80808	6.31946e-09	6.07441e-08
ENSG00000131373	3	15560699	15601852	-	HACL1	protein_coding	483.839	-1.50112	0.258459	-5.80796	6.32388e-09	6.07551e-08
ENSG00000110711	11	67483026	67491103	+	AIP	protein_coding	502.501	1.0607	0.182638	5.80768	6.33461e-09	6.08267e-08
ENSG00000228486	2	97664217	97703064	+	C2orf92	protein_coding	189.697	-1.77237	0.305195	-5.80734	6.34737e-09	6.09176e-08
ENSG00000177483	2	237798389	237842808	+	RBM44	protein_coding	30.3354	3.42056	0.589094	5.80648	6.38007e-09	6.11998e-08
ENSG00000163162	2	101271219	101308701	-	RNF149	protein_coding	1049.72	1.14673	0.197515	5.80579	6.40623e-09	6.1419e-08
ENSG00000187866	9	68780065	68785566	+	FAM122A	protein_coding	238.523	-1.22448	0.210931	-5.80511	6.43245e-09	6.16385e-08
ENSG00000240288	3	10285754	10294903	+	GHRLOS	lncRNA	14.3793	-6.50068	1.12018	-5.80323	6.50481e-09	6.22997e-08
ENSG00000228140	1	15402979	15409433	-	AL031283.1	lncRNA	34.2503	-3.65881	0.630557	-5.8025	6.53336e-09	6.25408e-08
ENSG00000164151	5	5420664	5490220	+	ICE1	protein_coding	845.322	-1.09115	0.188058	-5.80218	6.54572e-09	6.26268e-08
ENSG00000023892	6	35297818	35321771	+	DEF6	protein_coding	416.462	1.37229	0.236554	5.80118	6.58506e-09	6.29707e-08
ENSG00000005884	17	50055968	50090481	+	ITGA3	protein_coding	3758.72	1.5062	0.259684	5.80015	6.62575e-09	6.33271e-08
ENSG00000140265	15	43358172	43371025	-	ZSCAN29	protein_coding	176.079	-1.38519	0.238841	-5.79962	6.64671e-09	6.34948e-08
ENSG00000070423	19	647526	663233	-	RNF126	protein_coding	340.873	1.57723	0.27207	5.79715	6.74524e-09	6.44028e-08
ENSG00000124209	20	58309715	58367507	+	RAB22A	protein_coding	748.873	1.29586	0.223553	5.79666	6.76501e-09	6.45583e-08
ENSG00000203867	10	110644336	110839468	+	RBM20	protein_coding	230.867	-1.93851	0.334442	-5.79624	6.78186e-09	6.46859e-08
ENSG00000259871	16	19315164	19316526	+	AC130456.1	lncRNA	13.8572	-6.50858	1.12323	-5.79451	6.85194e-09	6.53206e-08
ENSG00000260737	16	80553256	80572808	-	LINC01227	lncRNA	21.3971	-6.43107	1.1102	-5.79272	6.92568e-09	6.59897e-08
ENSG00000140374	15	76215353	76311472	-	ETFA	protein_coding	1328.02	0.87141	0.15048	5.79088	7.00189e-09	6.66816e-08
ENSG00000006453	7	98291650	98401090	-	BAIAP2L1	protein_coding	1018.93	1.28095	0.221206	5.79076	7.00675e-09	6.66936e-08
ENSG00000204116	X	73563200	73687102	+	CHIC1	protein_coding	230.953	-1.24965	0.215823	-5.79017	7.0316e-09	6.68852e-08
ENSG00000270882	1	149832659	149839767	+	H4C14	protein_coding	86.0037	-3.51774	0.607542	-5.79011	7.0341e-09	6.68852e-08
ENSG00000175390	11	7970251	8001862	+	EIF3F	protein_coding	1011.14	1.48717	0.256897	5.78897	7.08187e-09	6.7305e-08
ENSG00000167766	19	52594060	52690496	-	ZNF83	protein_coding	1195.02	1.17993	0.203834	5.7887	7.09327e-09	6.73788e-08
ENSG00000005889	X	24149173	24216255	+	ZFX	protein_coding	618.622	-1.33905	0.231408	-5.78654	7.18513e-09	6.82164e-08
ENSG00000124920	11	61752642	61788518	+	MYRF	protein_coding	346.952	2.19518	0.379391	5.78606	7.20562e-09	6.83759e-08
ENSG00000090857	16	70113626	70162537	+	PDPR	protein_coding	235.44	-1.5103	0.261079	-5.78482	7.25914e-09	6.88486e-08
ENSG00000203879	X	154436913	154443467	+	GDI1	protein_coding	881.159	1.41008	0.243806	5.78363	7.31057e-09	6.93009e-08
ENSG00000184208	22	41688877	41698136	+	C22orf46	transcribed_unitary_pseudogene	113.501	-2.19076	0.379019	-5.78006	7.46722e-09	7.07497e-08
ENSG00000229666	5	67001383	67003953	-	MAST4-AS1	lncRNA	49.073	-2.85945	0.494829	-5.77867	7.52934e-09	7.13019e-08
ENSG00000127666	19	4815932	4831704	-	TICAM1	protein_coding	212.834	2.30804	0.399516	5.77708	7.60065e-09	7.19404e-08
ENSG00000184898	2	151247940	151261863	-	RBM43	protein_coding	713.027	-1.42041	0.24598	-5.77451	7.71764e-09	7.30105e-08
ENSG00000134248	1	110401249	110407942	-	LAMTOR5	protein_coding	1264.94	1.06659	0.184777	5.77229	7.82025e-09	7.39208e-08
ENSG00000156795	8	123416726	123470028	+	WDYHV1	protein_coding	169.273	1.25496	0.217412	5.77225	7.82184e-09	7.39208e-08
ENSG00000204514	19	57848731	57889074	-	ZNF814	protein_coding	260.863	-1.65347	0.286478	-5.77171	7.84688e-09	7.41197e-08
ENSG00000189164	19	37371061	37393066	+	ZNF527	protein_coding	95.2967	-1.68121	0.291428	-5.76885	7.98126e-09	7.53506e-08
ENSG00000261505	16	1317891	1322845	-	AL031714.1	lncRNA	101.997	2.31785	0.401932	5.76676	8.08123e-09	7.62556e-08
ENSG00000259205	15	100553529	100558954	-	PRKXP1	processed_pseudogene	10.9419	-6.26311	1.08636	-5.76522	8.1553e-09	7.69153e-08
ENSG00000050730	4	121131408	121227466	-	TNIP3	protein_coding	11.7559	-6.86469	1.1909	-5.76429	8.20005e-09	7.72981e-08
ENSG00000171291	19	11848726	11883750	+	ZNF439	protein_coding	146.919	-1.7089	0.296537	-5.76287	8.26943e-09	7.78738e-08
ENSG00000173726	1	235109341	235128837	-	TOMM20	protein_coding	3124.23	0.808683	0.140326	5.76287	8.26952e-09	7.78738e-08
ENSG00000136514	3	187368385	187372076	+	RTP4	protein_coding	527.289	-2.21562	0.384532	-5.76185	8.31986e-09	7.8308e-08
ENSG00000176029	11	8920076	8933006	-	C11orf16	protein_coding	430.147	-1.82642	0.317027	-5.76109	8.35737e-09	7.86212e-08
ENSG00000249267	12	125958688	125983665	-	LINC00939	lncRNA	57.5204	-2.91216	0.5055	-5.76095	8.36404e-09	7.8644e-08
ENSG00000164967	9	34610486	34612104	-	RPP25L	protein_coding	263.627	-1.69789	0.294745	-5.76053	8.38484e-09	7.87996e-08
ENSG00000124201	20	49237946	49278426	-	ZNFX1	protein_coding	1674.65	-1.46659	0.254674	-5.75869	8.47669e-09	7.96225e-08
ENSG00000161654	17	44034328	44067619	-	LSM12	protein_coding	434.058	1.11305	0.193285	5.75859	8.48205e-09	7.96325e-08
ENSG00000186976	22	43528744	43812337	-	EFCAB6	protein_coding	613.745	-0.968351	0.168205	-5.75697	8.56377e-09	8.0359e-08
ENSG00000214106	7	154928460	154952188	+	PAXIP1-AS2	lncRNA	119.233	-2.01774	0.350591	-5.75527	8.65037e-09	8.11306e-08
ENSG00000172725	11	67435510	67443821	-	CORO1B	protein_coding	1194.39	1.3582	0.236006	5.75493	8.66752e-09	8.12503e-08
ENSG00000163961	3	196468783	196503768	-	RNF168	protein_coding	250.82	1.13504	0.197264	5.75394	8.71892e-09	8.16909e-08
ENSG00000104341	8	97775057	97853013	+	LAPTM4B	protein_coding	1068.18	1.17179	0.203762	5.75078	8.88336e-09	8.31895e-08
ENSG00000229321	2	206798325	206926876	+	AC008269.1	lncRNA	22.6704	-5.12112	0.890921	-5.74812	9.02393e-09	8.44633e-08
ENSG00000235131	1	3712200	3714298	-	AL136528.2	lncRNA	15.7404	-6.34883	1.10455	-5.74788	9.0368e-09	8.4541e-08
ENSG00000164548	7	23504780	23532041	-	TRA2A	protein_coding	1717.35	-0.890098	0.154871	-5.74734	9.06568e-09	8.47685e-08
ENSG00000244509	22	39014257	39020352	+	APOBEC3C	protein_coding	651.219	1.71114	0.297809	5.74578	9.15005e-09	8.55142e-08
ENSG00000141644	18	50266882	50281774	-	MBD1	protein_coding	876.634	0.926288	0.161255	5.74424	9.23359e-09	8.62515e-08
ENSG00000113811	3	53884417	53891962	-	SELENOK	protein_coding	715.915	1.08905	0.189621	5.74328	9.28618e-09	8.66991e-08
ENSG00000143748	1	224227334	224330189	-	NVL	protein_coding	424.936	-1.33429	0.232336	-5.74293	9.3053e-09	8.68338e-08
ENSG00000104611	8	19313693	19396218	+	SH2D4A	protein_coding	1099.58	-0.799926	0.139297	-5.74258	9.32462e-09	8.69704e-08
ENSG00000013441	2	200853009	200864744	-	CLK1	protein_coding	3324.6	1.32751	0.231229	5.74108	9.40735e-09	8.76979e-08
ENSG00000230533	6	137657998	137763984	+	AL356234.2	lncRNA	12.7187	-6.77886	1.18089	-5.74048	9.44073e-09	8.79648e-08
ENSG00000188283	19	37217926	37248738	+	ZNF383	protein_coding	171.291	-1.16507	0.203017	-5.73881	9.53451e-09	8.8794e-08
ENSG00000164342	4	186069152	186088069	+	TLR3	protein_coding	777.007	-1.39472	0.243041	-5.73863	9.54439e-09	8.88414e-08
ENSG00000177082	15	84639281	84654343	-	WDR73	protein_coding	185.891	-1.69282	0.295016	-5.73805	9.57713e-09	8.91014e-08
ENSG00000164332	5	159263290	159286036	+	UBLCP1	protein_coding	735.921	-0.818762	0.142702	-5.73758	9.60406e-09	8.93072e-08
ENSG00000130159	19	11505929	11529172	-	ECSIT	protein_coding	182.335	1.46874	0.256049	5.73618	9.68377e-09	9.00032e-08
ENSG00000272145	1	40690380	40692066	-	NFYC-AS1	lncRNA	9.1033	-6.53673	1.1397	-5.7355	9.72261e-09	9.03189e-08
ENSG00000182796	12	55829608	55836246	+	TMEM198B	transcribed_unitary_pseudogene	187.374	-1.5889	0.277104	-5.73394	9.81251e-09	9.11084e-08
ENSG00000116954	1	38838198	38859772	-	RRAGC	protein_coding	181.268	1.49377	0.260542	5.7333	9.84958e-09	9.14069e-08
ENSG00000123870	19	52588505	52597345	+	ZNF137P	transcribed_unprocessed_pseudogene	41.2553	-2.62385	0.457662	-5.73316	9.85746e-09	9.14342e-08
[truncated: 16,543 more rows]
